# Supplementary material for: A single NLR gene confers resistance to leaf and stripe rust in wheat
Source: Research Square preprint supplement (doi:10.21203/rs.3.rs-3146908/v1), 2023-07-28
Supplement: Supplementary file 1 [file 0d228b1fe93dca9266ee7783.xlsx]

## Sheet: Sup Table 2
Supplementary Table 2. Phenotyping results of Ae. longissima population using P.triticina isolates #12337 and #12460
ACCENUMB	Plants #12337	#12337	1-9 #12337	Plants #12460	#12460	1-9 #12460	Plants Y239	Y239	1-9 Y239	Plants #5014	#5014	1-9 #5014	Plants #16247	#16247	1-9 #16247	Plants #16300	#16300	1-9 #16300
AEG-16-4	3	2,2+	5	3	2,2+	5	3	0;	1	3	0;-1-	1	3	0;CL	1	3	0;-1--	1
AEG-19-7	3	(2)3,(1)0;	9/1	3	(2)0;-1-,(1)3,2	1/9	3	0;	1	3	(2)3,(1)0;-1-	9/1	2	0;	1	1	3	9
AEG-29-18	3	3	9	3	3	9	3	1-2,2+	5	3	3	9	3	2++-3	7	3	3	9
AEG-249-1	3	3	9	2	3/0;-1,2,2+	9/5	2	(2)0;(1)2	3	3	3	9	3	(2)3,(1)1-2,3	9
AEG-250-2	3	3	9	3	3	9	3	3	9	2	3	9	3	3	9	3	3	9
AEG-264-19	2	3	9	2	3,2,1	7	3	3	9	2	3	9	3	3	9	3	3	9
AEG-281-40	3	0;-1--	1	3	0;	1	2	0;-1,2	3	3	3-C	9	1	0;,1+	1	2	3-/0;	9
AEG-282-41	2	3	9	3	3	9	3	(2)3,(1)nt	9	3	(2)3,(1)nt	9	3	3	9	3	3	9
AEG-284-44	3	0;	1	3	0;-1-	1	2	3/nt	9	3	3	9	3	3	9	3	3	9
AEG-299-6	3	(2)3,(1)0nt	9	3	(2)3,(1)nt	9	2	3	9	3	3	9				2	3	9
AEG-622-4	3	0;	1	3	(2)0;,(1)nt	1	3	0;-1	1	3	0;-1C	1	2	3/nt	9	2	3	9
AEG-623-5	3	(2)0;-1,(1)3	1/9	3	(2)0;-1-,(1)3,2	1/9	3	0;-1,2,2+	5	3	3C	9	3	3	9	3	3	9
AEG-624-6	3	(2)0;-1,2,(1)3,2	1/9	5	0;-1	1	3	3	9	3	3	9	3	3C	9	2	3	9
AEG-625-7	3	0;-1--	1	3	0;-1,2,2+	3	3	3	9	2	3	9	3	3	9	3	3	9
AEG-627-9	3	0;-1,1+	1	3	0;	1	3	3	9	3	2-3	7
AEG-628-10	3	3	9	3	3	9	3	3	9	2	3	9	2	3	9
AEG-657-39	2	0;-1-	1	3	0;-1	1	3	3	9	3	3	9	2	3	9	3	3	9
AEG-664-4	3	0;-1,1+	1	3	(2)0;-1,1+,(1)nt	1	3	3	9	2	3	9	1	3	9	3	3	9
AEG-668-8	2	3	9	3	3	9	3	3	9	3	3	9	1	3	9	3	3	9
AEG-682-22	3	(1)3,(2)1-2	9/1	3	(2)3,2,(1)nt	7	2	3	9	3	3	9	3	3	9	3	3	9
AEG-710-50	2	3	9	3	3	9	3	3	9	4	3	9	3	3C	9	3	3	9
AEG-712-2	2	3	9	3	3	9	3	3	9	3	3	9	3	3,2	7	3	3	9
AEG-713-3	3	3	9	3	3	9	3	3	9	3	3	9	3	(2)3C,(1)nt	9	1	3	9
AEG-719-9	2	3	9	2	3,2/nt	7	3	3	9	3	3	9	2	3/nt	9
AEG-757-3	3	3	9	3	3	9	3	3	9	3	2-3C	7	3	3	9	3	3	9
AEG-761-7	3	0;	1	3	0;-1--	1	3	(1)3(2)0;	9/1	3	(2)0;-1,1+,(1)3	1/9	2	3-	9	3	3	9
AEG-763-9	2	3	9	3	3	9	3	3	9	2	3	9	3	3	9	3	3,2	7
AEG-766-12	3	3	9	1	3	9	5	3	9	3	3	9	2	3	9	3	3
AEG-791-37	2	0;-1-	1	1	0;-1--	1	3	3	9	3	1-2,2+	5	8	(3)3,(2)0//(2)3,(1)0	9/1	3	(2)0;-1,(1)1-2	3
AEG-1013-11	3	3	9	3	(2)3,(1)nt	9	3	0;-1	1	2	0;-1,1+,2	3				2	3/nt	9
AEG-1033-31	2	3	9	3	3	9	3	3	9	3	3	9	2	0;,1,2	3
AEG-1057-4	1	3	9	1	3	9	3	3	9	3	(1)3,(2)nt	9
AEG-1185-6	3	3	9	3	3	9	3	0;	1	2	3	9	3	3-	9	3	3	9
AEG-1205-1	3	0;-1,2	3	3	1-2,2+,3	7	3	3	9	3	3	9	2	3/0;,1-	9/1	2	1-2,2	3
AEG-1207-3	2	0;-1--	1	3	(2)0;-1,2,2+,(1)0;	5/1	3	2-3-C	7	3	3C	9	2	(2)1-2,2+(1)0;	5/1	3	3,2C	7
AEG-1208-4	3	3	9	3	3	9	3	3	9	3	3	9	2	(2)0;,(1)1-2	3	3	3	9
AEG-1255-1	3	3	9	3	3	9	3	3	9	3	3	9	3	3	9	3	3	9
AEG-1264-10	3	0;	1	3	0,0;	1	3	3	9	3	3	9	3	3	9	3	(2)3,(1)nt	9
AEG-1266-12	2	3	9	3	3	9	2	2-2+C	5	3	3-C	9	1	3	9	2	3,2/0;	7
AEG-1271-17	3	3	9	3	3	9	3	3	9	3	3	9	3	0;-1,2,2+	5	3	0;-1,1+	1
AEG-1285-31	3	3	9	2	3	9	3	3	9	3	(2)3,(1)nt	9	4	0;,1+	1	2	3	9
AEG-1296-42	3	3,2	7	3	3-	9	3	3	9	2	3	9	1	1-2	3	1	3	9
AEG-1303-49	3	3	9	3	3	9	2	3	9	3	3	9	3	2-2+,3	7	3	3	9
AEG-1306-2	3	(2)3,(1)0;-1,2,3	9/5	3	(2)3,(1)0;-1-	9/1	3	(2)0;(1)3	1/9	3	3	9	2	1+/0;	1	3	3	9
AEG-1356-2	3	3	9	3	3	9	3	3-	9	3	3	9	3	3	9	3	3	9
AEG-1358-4	3	0;-1,2	3	3	0;-1	1	3	(2)3(1)0;	9/1	3	(2)3,(1)0;	9/1	3	(2)3,(1)nt	9	3	3C	9
AEG-1361-7	3	(2)0;-1,(1)3-	1/9	3	(2)3,2,(1)0;-1,2,2+	7/5	3	3	9	3	3	9	2	3,2	7	2	3	9
AEG-1406-1	3	3	9	2	3	9	3	3	9	2	3	9	3	3-	9	2	3	9
AEG-1407-2	3	3	9	3	3	9	3	3	9	2	3	9	2	3	9	3	3	9
AEG-1449-44	3	3	9	3	3	9	3	0;,1-2	3	3	3	9	3	3-,2	7	3	3,2	7
AEG-1451-46	3	(2)1-2,2+,(1)nt	5	2	0;-1,1+/0;-1,2	3	3	0;	1	3	0;-1,1+	1	1	3,0;	7
AEG-1514-6	3	1-2	3	3	(2)0;-1,2,(1)nt	3	3	3	9	3	3	9	1	3	9	3	3	9
AEG-1515-7	3	0;	1	2	0;	1	3	1-2	3	3	(2)3,(1)0;C	9/1	2	0;-1,2/nt	3	3	3	9
AEG-1673-8	3	3,2	7	3	3,2	7	3	3-	9	3	3-C	9	3	3	9	3	3	9
AEG-1865-6	3	(2)3,(1)3,2	7	3	3	9	3	3	9	3	3	9	3	1-2	3	3	3	9
AEG-1880-8	3	1-2,2+	5	3	1-2,2+	5	3	0;-1	1	3	3	9	3	3,2	7	3	3-	9
AEG-1882-10	3	(2)3,(1)nt	9	3	3	9	3	2-2+C	5	3	0;-1,2,2+	5	3	3-	9	3	3	9
AEG-2052-9	3	3	9	3	3	9	3	3	9	3	3	9	3	3,2	7	3	3,2	7
AEG-2055-12	3	3+	9	3	3	9	3	3-	9	3	3	9	3	3,2	7	3	(2)3,(1)0;-1,1+	9/1
AEG-2284-41	3	(2)3,2,(1)0;-1-	7/1	3	3,2	7	2	0;,1-2,2+C	5	3	3	9	3	3-	9	2	0;CL	1
AEG-3355-20	3	0;-1--	1	2	0;-1--	1	3	1-2,2+C	5	3	0;	1	2	1-2,2+	5	3	3	9
AEG-3765-40	2	0;	1	1	0;-1--	1	2	(1)3-,(1)0;-1,(1)nt	9/1	2	0;-1--	1	1	0,0;	1
AEG-4001-16	2	3,2	7	3	3	9	3	3-	9	3	3	9	4	(3)3,(1)nt	9	3	3	9
AEG-4162-3				3	(2)0,0;,(1)nt	1							3	(2)3,(1)1--	9/1	2	3/2+	9/5
AEG-4163-4	1	3	9				2	3	9
AEG-4166-7	2	3	9	3	(2)3,(1)nt	9	3	3	9	3	3	9	2	0,0;	1
AEG-4185-26	3	(2)3,(1)3,2	7	3	(2)3,(1)nt	9	3	3	9	3	(2)3,(1)nt	9				3	3	9
AEG-4194-35	3	3	9	2	3	9	3	3	9	3	3	9	1	1-2	3	2	3-	9
AEG-5016-1	3	(2)0,0;,(1)0;-1,2,2+	3	3	(2)0;-1,1+,(1)0;-1--	1	3	3	9	3	3	9	1	nt		3	3	9
AEG-5646-1	2	3	9	3	3,2	7	2	3	9	3	3	9	1	0,0;	1	2	0;	1
AEG-5647-2	3	3,2	7	1	3-	9	2	3	9	3	3	9	3	3	9	2	3	9
AEG-6371-0	3	3	9	3	3,2	7	1	3	9	3	3-	9	3	3	9
AEG-6766-4	3	3	9	3	3	9	3	3	9	1	3	9	1	3	9
AEG-6781-1	3	3	9	3	3	9	3	3	9	3	3	9	2	3	9	3	3	9
AEG-6782-2	3	0;	1	3	0;C	1	3	0;	1				2	3	9	2	3	9
AEG-6783-3	3	3,2	7	3	3,2	7	3	0;-1--	1	3	(1)3,(2)0;-1,1+	9/1	2	3/0;	9/1
AEG-8696-1	3	3	9	3	3	9	3	3-	9	3	3	9	4	2-2+	5	3	2-2+	5
AEG-8698-3	3	3	9	3	3	9	3	1-2,2+	5	3	3	9	2	3	9
AEG-8708-13	2	3+	9	3	3	9	3	(2)3,(1)nt	9	3	3	9	3	3	9	3	3	9
AEG-8760-15	2	3+	9	2	3	9	3	(2)3(1)0;	9/1	2	3	9	1	3	9
AEG-8771-1	3	0,0;	1	3	0,0;	1	3	3	9	3	3	9	2	3	9	3	3	9
AEG-8773-3	2	1-2,2+	5	3	2,2+	5	2	0;,2-3C	7	3	3	9		died
AEG-8779-1		3	9	1	3-	9	3	3	9	2	3	9
AEG-9523-2	3	3	9	2	3	9	2	3	9	1	3	9
AEG-9525-4	1	0;-1,1+	1	2	3/nt	9	3	(2)0;,(1)2-3	1/7	3	2-3	7	2	2,2+	5
AEG-9527-1	3	0;	1	3	0;-1--	1	3	0;-1-	1	3	(2)3,(1)0;	9/1
AEG-9528-2	3	3	9	3	3	9	2	(1)3,(1)0;,(1)nt	9/1	3	3	9	2	3	9	2	3	9
AEG-9547-1	1	3	9				3	3	9	2	3/nt	9
AEG-9576-0	3	3,2	7	2	3	9	3	(1)3,(1)0;,(1)0;-1	9/1	3	3	9	3	3,2	7	2	3	9
AEG-9583-0	3	(2)0;-1,2,2+(1)nt	5	1	0;-1,1+	1	3	0;-1,2	3	3	0;-1,2	3	1	0;	1
AEG-9588-5	3	3,2	7	3	1-1+,2	3	3	0;	1	3	0;	1	3	0;CL	1	3	0;-1-	1
AEG-9614-2	3	3	9	3	3	9	3	3	9	3	3	9	2	3	9	2	3	9
AEG-9657-11	3	(2)3,(1)nt	9	2	3	9	3	3(0;)	9	3	0;	1	2	3	9	2	3/nt	9
AEG-9662-16	3	3	9	3	3	9	3	3	9	3	3	9	3	3	9	3	3C	9
AEG-9742-7	3	0;-1--	1	3	0;-1--	1	3	0;	1	3	0;-1C	1	3	0;-1,2	3	3	3	9
AEG-9754-1	3	3	9	3	3	9	3	0;,1-2	3	2	0;,1-2	3	3	2-2+	5	3	1-2,2+	5
AEG-9755-1	3	3	9	2	3,2/nt	7	3	(2)3-,(1)0;	9/1	3	3	9	2	0;-1	1	3	2-2+	5
AEG-9757-1	3	3	9	3	3	9	2	3	9	3	3	9	4	3	9	2	3+	9
AEG-8769-24	2	3	9				3	0;-1,2	3	3	0;-1,2	3
AEG-631-13	3	3	9	3	3	9
AEG-738-28	3	0;	1	3	0;-1--	1
AEG-746-36	3	0,0;	1	3	0,0;	1
AEG-1005-3	3	3	9	2	3-	9
AEG-1308-4	3	0;-1--	1	3	0;-1,1+	1
AEG-1316-12	3	1-2	3	3	2-2+	5
AEG-1360-6	3	(2)3,(1)albino	9	3	3	9
AEG-1409-4	3	0;-1,2,3	5	3	0;-1	1
AEG-1471-15	3	3	9	3	3-	9
AEG-1478-22	3	3	9	2	3	9
AEG-1509-1	3	3	9	3	3	9
AEG-1510-2	3	0;-1,2	3	3	1-2,2+	5
AEG-1513-5	3	3	9	3	3	9
AEG-1685-20	3	3	9	3	3	9
AEG-1754-89	3	3	9	3	3	9
AEG-1760-5	3	3	9	3	2-2+	5
AEG-1793-38	3	0;-1,2	3	3	3,2	7
AEG-1860-1	3	3	9	3	3	9
AEG-1877-5	3	3-	9	2	3,2	7
AEG-2062-19	3	3	9	3	3	9
AEG-2065-22	3	3	9	3	3	9
AEG-2247-4	3	0;	1	3	0;-1--	1
AEG-2252-9	3	3	9	2	3	9
AEG-2253-10	2	3	9	3	3	9
AEG-2265-22	3	0;	1	3	0;	1
AEG-2894-31	3	3	9	3	3	9
AEG-2898-1	3	3	9	3	3	9
AEG-2993-0	3	3	9	3	3	9
AEG-3039-0	3	3	9	3	3	9
AEG-3338-3	3	3	9	3	3	9
AEG-3339-4	3	3	9	2	3	9
AEG-3375-40	3	3	9	3	3	9
AEG-3407-5	3	0,0;	1	3	0;	1
AEG-3463-1	2	3,2	7	2	3/nt	9
AEG-3478-1	3	3	9	3	3	9
AEG-3491-14	3	3	9	3	3	9
AEG-8794-1	3	3	9	3	3	9
AEG-8795-2	3	3	9	3	3,2	7
