# Supplementary material for: A single NLR gene confers resistance to leaf and stripe rust in wheat
Source: Research Square preprint supplement (doi:10.21203/rs.3.rs-3146908/v1), 2023-07-28
Supplement: Supplementary file 2 [file 5e6c05ff8009c0efd343afe3.xlsx]

## Sheet: Sup Table 4
Supplementary Table 4. Lr/Yr548 protein sequence similarity in cereal species.
Description	Scientific Name	Query Cover	E value	Per. ident	Acc. Len	Accession
putative disease resistance protein RGA1 [Aegilops tauschii subsp. strangulata]	Aegilops tauschii subsp. strangulata	0.97	0	78.67	1346	XP_020162862.1
disease resistance protein RGA2-like [Triticum aestivum]	Triticum aestivum	0.97	0	60.69	1506	XP_044359446.1
putative disease resistance protein RGA3 isoform X2 [Triticum aestivum]	Triticum aestivum	0.97	0	57.82	1553	XP_044359457.1
putative disease resistance protein RGA3 isoform X1 [Triticum aestivum]	Triticum aestivum	0.97	0	57.63	1558	XP_044359453.1
putative disease resistance protein RGA1 isoform X1 [Aegilops tauschii subsp. strangulata]	Aegilops tauschii subsp. strangulata	0.97	0	58.56	1458	XP_020156333.1
hypothetical protein CFC21_013227 [Triticum aestivum]	Triticum aestivum	0.97	0	59.68	1540	KAF6996956.1
putative disease resistance protein RGA1 [Triticum aestivum]	Triticum aestivum	0.97	0	59.68	1703	XP_044451282.1
putative disease resistance protein RGA1 [Aegilops tauschii subsp. strangulata]	Aegilops tauschii subsp. strangulata	0.97	0	59.54	1540	XP_040245775.1
LOW QUALITY PROTEIN: putative disease resistance protein RGA3 [Brachypodium distachyon]	Brachypodium distachyon	0.99	0	61.31	1501	XP_024314765.1
LOW QUALITY PROTEIN: putative disease resistance protein RGA3 [Brachypodium distachyon]	Brachypodium distachyon	0.95	0	63.19	1326	XP_024314762.1
disease resistance protein RGA2-like [Triticum urartu]	Triticum urartu	0.98	0	61.56	1431	XP_048565996.1
disease resistance protein RGA2-like isoform X1 [Triticum aestivum]	Triticum aestivum	0.98	0	61.56	1433	XP_044359458.1
putative disease resistance protein RGA1 [Triticum urartu]	Triticum urartu	0.97	0	60.2	1407	XP_048566001.1
hypothetical protein CFC21_049919 [Triticum aestivum]	Triticum aestivum	0.98	0	61.56	1480	KAF7039982.1
disease resistance protein RGA2-like [Triticum urartu]	Triticum urartu	0.96	0	63.12	1373	XP_048565990.1
putative disease resistance protein RGA1 [Aegilops tauschii subsp. strangulata]	Aegilops tauschii subsp. strangulata	0.97	0	57.96	1779	XP_020199709.2
disease resistance protein RGA2-like isoform X2 [Triticum aestivum]	Triticum aestivum	0.98	0	61.56	1431	XP_044359459.1
putative disease resistance protein RGA3 [Lolium rigidum]	Lolium rigidum	0.97	0	61.25	1358	XP_047051384.1
putative disease resistance protein RGA3 [Triticum aestivum]	Triticum aestivum	0.97	0	56.76	1529	XP_044391916.1
hypothetical protein BRADI_2g60230v3 [Brachypodium distachyon]	Brachypodium distachyon	0.98	0	62.71	1405	PNT73551.1
putative disease resistance protein RGA3 isoform X1 [Brachypodium distachyon]	Brachypodium distachyon	0.98	0	62.71	1374	XP_010232791.2
hypothetical protein BRADI_2g60230v3 [Brachypodium distachyon]	Brachypodium distachyon	0.97	0	62.71	1402	PNT73547.1
putative disease resistance protein RGA3 isoform X2 [Brachypodium distachyon]	Brachypodium distachyon	0.97	0	62.71	1371	XP_014754561.1
unnamed protein product [Triticum turgidum subsp. durum]	Triticum turgidum subsp. durum	0.97	0	57.05	1433	VAI40400.1
putative disease resistance protein RGA3 [Triticum dicoccoides]	Triticum dicoccoides	0.97	0	56.85	1433	XP_037444597.1
disease resistance protein RGA2-like [Lolium rigidum]	Lolium rigidum	0.98	0	61.71	1553	XP_047058153.1
disease resistance protein RGA2-like [Aegilops tauschii subsp. strangulata]	Aegilops tauschii subsp. strangulata	0.98	0	60.33	1423	XP_045089812.1
putative disease resistance protein RGA4 [Lolium rigidum]	Lolium rigidum	0.97	0	61.06	1399	XP_047058181.1
hypothetical protein BRADI_2g60260v3 [Brachypodium distachyon]	Brachypodium distachyon	0.97	0	61.82	1353	KQK11445.1
putative disease resistance protein RGA3 isoform X2 [Aegilops tauschii subsp. strangulata]	Aegilops tauschii subsp. strangulata	0.91	0	59.4	1357	XP_020156337.1
putative disease resistance protein RGA1 [Triticum dicoccoides]	Triticum dicoccoides	0.97	0	56.11	1433	XP_037444588.1
putative disease resistance protein RGA3 isoform X3 [Aegilops tauschii subsp. strangulata]	Aegilops tauschii subsp. strangulata	0.9	0	59.54	1336	XP_020156338.1
putative disease resistance protein RGA4 [Oryza glaberrima]	Oryza glaberrima	0.98	0	55.33	1760	XP_052140172.1
hypothetical protein BRADI_2g60230v3 [Brachypodium distachyon]	Brachypodium distachyon	0.97	0	60.46	1361	PNT73549.1
Putative disease resistance protein RGA3 [Triticum urartu]	Triticum urartu	0.89	0	63.41	1299	EMS55639.1
hypothetical protein BRADI_2g60230v3 [Brachypodium distachyon]	Brachypodium distachyon	0.98	0	60.46	1364	PNT73546.1
putative disease resistance protein RGA3 [Hordeum vulgare subsp. vulgare]	Hordeum vulgare subsp. vulgare	0.98	0	56.44	1436	XP_044974159.1
hypothetical protein BRADI_2g60250v3 [Brachypodium distachyon]	Brachypodium distachyon	0.88	0	64.03	1210	PNT73556.1
hypothetical protein BRADI_2g60260v3 [Brachypodium distachyon]	Brachypodium distachyon	0.97	0	59.64	1312	PNT73559.1
Disease resistance protein RGA2 [Triticum urartu]	Triticum urartu	0.88	0	61.25	1292	EMS64207.1
hypothetical protein CFC21_075274 [Triticum aestivum]	Triticum aestivum	0.97	0	57.8	1343	KAF7069681.1
putative disease resistance protein RGA1 [Triticum aestivum]	Triticum aestivum	0.97	0	57.7	1345	XP_044365377.1
putative disease resistance protein RGA3 [Triticum urartu]	Triticum urartu	0.97	0	57.43	1373	XP_048543538.1
hypothetical protein CFC21_081221 [Triticum aestivum]	Triticum aestivum	0.92	0	57.41	1436	KAF7076593.1
putative disease resistance protein RGA3 isoform X4 [Triticum aestivum]	Triticum aestivum	0.92	0	57.41	1443	XP_044400613.1
unnamed protein product [Triticum turgidum subsp. durum]	Triticum turgidum subsp. durum	0.97	0	57.55	1345	VAH96290.1
putative disease resistance protein RGA3 isoform X1 [Triticum aestivum]	Triticum aestivum	0.97	0	57.41	1350	XP_044400600.1
NBS-LRR disease resistance protein [Dasypyrum villosum]	Dasypyrum villosum	0.97	0	58.39	1270	UBY07374.1
putative disease resistance protein RGA3 isoform X1 [Aegilops tauschii subsp. strangulata]	Aegilops tauschii subsp. strangulata	0.97	0	57.34	1350	XP_020198701.1
predicted protein [Hordeum vulgare subsp. vulgare]	Hordeum vulgare subsp. vulgare	0.92	0	55.2	1428	BAJ97003.1
putative disease resistance protein RGA1 [Hordeum vulgare subsp. vulgare]	Hordeum vulgare subsp. vulgare	0.98	0	55.07	1434	XP_044978332.1
disease resistance protein RGA2-like [Triticum dicoccoides]	Triticum dicoccoides	0.97	0	57.11	1489	XP_037474480.1
putative disease resistance protein RGA4 [Triticum aestivum]	Triticum aestivum	0.96	0	56.19	1469	XP_044354063.1
hypothetical protein CFC21_075275 [Triticum aestivum]	Triticum aestivum	0.97	0	58.11	1294	KAF7069682.1
disease resistance protein RGA2-like [Oryza glaberrima]	Oryza glaberrima	0.9	0	54.14	1337	XP_052140175.1
hypothetical protein CFC21_049921 [Triticum aestivum]	Triticum aestivum	0.96	0	56.05	1467	KAF7039985.1
putative disease resistance protein RGA3 isoform X2 [Triticum aestivum]	Triticum aestivum	0.91	0	58.99	1316	XP_044400607.1
putative disease resistance protein RGA3 isoform X3 [Triticum aestivum]	Triticum aestivum	0.91	0	58.99	1302	XP_044400611.1
putative disease resistance protein RGA3 [Triticum dicoccoides]	Triticum dicoccoides	0.97	0	56.07	1330	XP_037444761.1
unnamed protein product [Triticum turgidum subsp. durum]	Triticum turgidum subsp. durum	0.97	0	57.13	1297	VAH96291.1
unnamed protein product [Triticum turgidum subsp. durum]	Triticum turgidum subsp. durum	0.97	0	56.95	1270	VAI40399.1
disease resistance protein RGA2-like [Triticum aestivum]	Triticum aestivum	0.97	0	57.02	1275	XP_044391918.1
disease resistance protein RGA2-like [Triticum urartu]	Triticum urartu	0.98	0	50.9	1543	XP_048565975.1
hypothetical protein CFC21_008917 [Triticum aestivum]	Triticum aestivum	0.97	0	54.17	1501	KAF6991867.1
unnamed protein product [Triticum turgidum subsp. durum]	Triticum turgidum subsp. durum	0.82	0	57.77	1190	VAI40811.1
putative disease resistance protein RGA3 [Hordeum vulgare]	Hordeum vulgare	0.96	0	56.36	1255	KAE8816777.1
Putative disease resistance protein RGA3 [Triticum urartu]	Triticum urartu	0.99	0	55.21	1416	EMS59866.1
disease resistance protein RGA2-like isoform X1 [Triticum aestivum]	Triticum aestivum	0.97	0	53.82	1427	XP_044451715.1
disease resistance protein RGA2-like isoform X5 [Triticum aestivum]	Triticum aestivum	0.97	0	53.82	1340	XP_044451719.1
disease resistance protein RGA2-like isoform X4 [Triticum aestivum]	Triticum aestivum	0.97	0	53.82	1367	XP_044451718.1
putative disease resistance protein RGA3 [Triticum aestivum]	Triticum aestivum	0.97	0	54.13	1486	XP_044420693.1
disease resistance protein RGA2-like isoform X3 [Triticum aestivum]	Triticum aestivum	0.97	0	53.82	1369	XP_044451717.1
disease resistance protein RGA2-like isoform X2 [Triticum aestivum]	Triticum aestivum	0.97	0	53.82	1373	XP_044451716.1
disease resistance protein RGA2-like [Aegilops tauschii subsp. strangulata]	Aegilops tauschii subsp. strangulata	0.97	0	54.33	1280	XP_020154381.1
disease resistance protein RGA2 isoform X1 [Aegilops tauschii subsp. strangulata]	Aegilops tauschii subsp. strangulata	0.97	0	53.97	1416	XP_020178359.1
disease resistance protein RGA2 isoform X4 [Aegilops tauschii subsp. strangulata]	Aegilops tauschii subsp. strangulata	0.97	0	53.97	1329	XP_020178364.1
disease resistance protein RGA2 isoform X3 [Aegilops tauschii subsp. strangulata]	Aegilops tauschii subsp. strangulata	0.97	0	53.97	1356	XP_020178362.1
disease resistance protein RGA2 isoform X2 [Aegilops tauschii subsp. strangulata]	Aegilops tauschii subsp. strangulata	0.97	0	53.97	1358	XP_020178361.1
putative disease resistance protein RGA1 [Triticum aestivum]	Triticum aestivum	0.97	0	54.25	1280	XP_044400390.1
disease resistance protein RGA2 [Oryza sativa Japonica Group]	Oryza sativa Japonica Group	0.96	0	54.95	1217	XP_015649424.1
putative disease resistance protein RGA1 [Triticum urartu]	Triticum urartu	0.97	0	54.55	1284	XP_048551360.1
disease resistance protein RGA2-like [Triticum aestivum]	Triticum aestivum	0.96	0	54.96	1249	XP_044394499.1
putative blight resistance protein [Oryza sativa Japonica Group]	Oryza sativa Japonica Group	0.96	0	54.37	1213	BAD87306.1
putative disease resistance protein RGA1 isoform X3 [Aegilops tauschii subsp. strangulata]	Aegilops tauschii subsp. strangulata	0.97	0	52.77	1507	XP_045085363.1
putative disease resistance protein RGA1 isoform X4 [Aegilops tauschii subsp. strangulata]	Aegilops tauschii subsp. strangulata	0.97	0	52.77	1481	XP_045085364.1
putative disease resistance protein RGA1 isoform X7 [Triticum aestivum]	Triticum aestivum	0.97	0	52.77	1455	XP_044451712.1
putative disease resistance protein RGA1 isoform X5 [Aegilops tauschii subsp. strangulata]	Aegilops tauschii subsp. strangulata	0.97	0	52.77	1456	XP_045085365.1
putative disease resistance protein RGA1 isoform X8 [Triticum aestivum]	Triticum aestivum	0.97	0	52.77	1430	XP_044451713.1
putative disease resistance protein RGA1 isoform X5 [Triticum aestivum]	Triticum aestivum	0.97	0	52.77	1481	XP_044451710.1
putative disease resistance protein RGA1 isoform X6 [Triticum aestivum]	Triticum aestivum	0.97	0	52.77	1456	XP_044451711.1
putative disease resistance protein RGA1 isoform X2 [Aegilops tauschii subsp. strangulata]	Aegilops tauschii subsp. strangulata	0.97	0	52.77	1508	XP_020178369.1
putative disease resistance protein RGA1 isoform X3 [Triticum aestivum]	Triticum aestivum	0.97	0	52.77	1507	XP_044451708.1
putative disease resistance protein RGA1 isoform X4 [Triticum aestivum]	Triticum aestivum	0.97	0	52.77	1482	XP_044451709.1
putative disease resistance protein RGA1 isoform X1 [Aegilops tauschii subsp. strangulata]	Aegilops tauschii subsp. strangulata	0.97	0	52.77	1533	XP_020178367.1
putative disease resistance protein RGA1 isoform X2 [Triticum aestivum]	Triticum aestivum	0.97	0	52.77	1508	XP_044451707.1
putative disease resistance protein RGA1 isoform X1 [Triticum aestivum]	Triticum aestivum	0.97	0	52.77	1533	XP_044451706.1
hypothetical protein CFC21_100960 [Triticum aestivum]	Triticum aestivum	0.81	0	62.24	1091	KAF7099319.1
unnamed protein product [Triticum turgidum subsp. durum]	Triticum turgidum subsp. durum	0.81	0	62.15	1091	VAI82367.1
hypothetical protein OsJ_04697 [Oryza sativa Japonica Group]	Oryza sativa Japonica Group	0.96	0	53.35	1710	EEE55968.1
disease resistance protein RGA2-like [Triticum aestivum]	Triticum aestivum	0.97	0	53.98	1332	XP_044360032.1
