# Supplementary material for: A single NLR gene confers resistance to leaf and stripe rust in wheat
Source: Research Square preprint supplement (doi:10.21203/rs.3.rs-3146908/v1), 2023-07-28
Supplement: Supplementary file 3 [file c7a814c8808e4c610be0c2c0.xlsx]

## Sheet: Sup Table 3
Supplementary Table 3. Lr/Yr548 coding sequence similarity in cereal species
Description	Scientific Name	Query Cover	E value	Per. ident	Acc. Len	Accession
PREDICTED: Aegilops tauschii subsp. strangulata putative disease resistance protein RGA1 (LOC109748238), transcript variant X1, mRNA	Aegilops tauschii subsp. strangulata	0.97	0	86.56	5391	XM_020307273.3
PREDICTED: Triticum urartu disease resistance protein RGA2-like (LOC125545958), transcript variant X1, mRNA	Triticum urartu	0.86	0	82.98	5857	XM_048710018.1
PREDICTED: Triticum aestivum putative disease resistance protein RGA3 (LOC123114383), mRNA	Triticum aestivum	0.8	0	73.35	5500	XM_044535828.1
PREDICTED: Triticum dicoccoides putative disease resistance protein RGA3 (LOC119312915), mRNA	Triticum dicoccoides	0.8	0	73.35	5119	XM_037588700.1
PREDICTED: Triticum urartu disease resistance protein RGA2-like (LOC125545966), transcript variant X1, mRNA	Triticum urartu	0.74	0	77.59	6258	XM_048710033.1
PREDICTED: Triticum aestivum disease resistance protein RGA2-like (LOC123114490), mRNA	Triticum aestivum	0.62	0	74.38	4184	XM_044535983.1
Dasypyrum villosum isolate Hv_Contig_894_nlr_1 NBS-LRR disease resistance protein mRNA, partial cds	Dasypyrum villosum	0.6	0	81.94	3810	MZ672775.1
PREDICTED: Triticum aestivum putative disease resistance protein RGA4 (LOC123075549), mRNA	Triticum aestivum	0.6	0	77.81	4984	XM_044498128.1
PREDICTED: Triticum urartu putative disease resistance protein RGA3 (LOC125522530), mRNA	Triticum urartu	0.6	0	73.2	4673	XM_048687581.1
PREDICTED: Lolium rigidum disease resistance protein RGA2-like (LOC124664751), mRNA	Lolium rigidum	0.56	0	79.13	4662	XM_047202197.1
PREDICTED: Lolium rigidum putative disease resistance protein RGA4 (LOC124664787), mRNA	Lolium rigidum	0.55	0	78.87	4200	XM_047202225.1
PREDICTED: Triticum aestivum disease resistance protein RGA2-like (LOC123080588), transcript variant X1, mRNA	Triticum aestivum	0.49	0	78.91	4394	XM_044503523.1
PREDICTED: Triticum urartu disease resistance protein RGA2-like (LOC125545970), transcript variant X1, mRNA	Triticum urartu	0.49	0	78.86	5648	XM_048710039.1
PREDICTED: Aegilops tauschii subsp. strangulata disease resistance protein RGA2 (LOC109741696), mRNA	Aegilops tauschii subsp. strangulata	0.48	0	83.88	3370	XM_040402871.1
PREDICTED: Hordeum vulgare subsp. vulgare putative disease resistance protein RGA3 (LOC123442136), mRNA	Hordeum vulgare subsp. vulgare	0.47	0	73.82	5279	XM_045118224.1
PREDICTED: Brachypodium distachyon putative disease resistance protein RGA3 (LOC100836635), mRNA	Brachypodium distachyon	0.46	0	78.89	7247	XM_024458994.1
PREDICTED: Triticum aestivum disease resistance protein RGA2-like (LOC123117898), mRNA	Triticum aestivum	0.46	0	74.67	3958	XM_044538564.1
PREDICTED: Lolium rigidum putative disease resistance protein RGA3 (LOC124656732), mRNA	Lolium rigidum	0.45	0	79.54	4077	XM_047195428.1
Dasypyrum villosum isolate Hv_Contig_1228_nlr_1 NBS-LRR disease resistance protein mRNA, complete cds	Dasypyrum villosum	0.44	3e-123	73.92	3567	MZ672909.1
PREDICTED: Triticum aestivum putative disease resistance protein RGA3 (LOC123123989), mRNA	Triticum aestivum	0.4	0	74.25	3882	XM_044544679.1
PREDICTED: Aegilops tauschii subsp. strangulata disease resistance protein RGA2-like (LOC109741700), mRNA	Aegilops tauschii subsp. strangulata	0.39	0	79.31	4676	XM_045233877.1
PREDICTED: Aegilops tauschii subsp. strangulata disease resistance protein RGA2 (LOC109763900), transcript variant X1, mRNA	Aegilops tauschii subsp. strangulata	0.37	1e-166	74.69	4724	XM_020322770.3
PREDICTED: Triticum aestivum disease resistance protein RGA2-like (LOC123183052), transcript variant X1, mRNA	Triticum aestivum	0.37	1e-166	74.69	4513	XM_044595780.1
PREDICTED: Aegilops tauschii subsp. strangulata disease resistance protein RGA2 (LOC120961907), transcript variant X2, mRNA	Aegilops tauschii subsp. strangulata	0.21	0	81.99	1587	XM_040385781.2
PREDICTED: Aegilops tauschii subsp. strangulata putative disease resistance protein At3g14460 (LOC109741703), transcript variant X1, mRNA	Aegilops tauschii subsp. strangulata	0.17	0	87.87	5336	XM_045233875.1
