# Supplementary material for: A single NLR gene confers resistance to leaf and stripe rust in wheat
Source: Research Square preprint supplement (doi:10.21203/rs.3.rs-3146908/v1), 2023-07-28
Supplement: Supplementary file 4 [file d491bdccf1b735f7310173bc.xlsx]

## Sheet: Sup Table 1
Supplementary Table 1. Summary of the transcripts detected at different time intervals using the MutRNAseq analysis.
Transcript	Size	snps	fD42t	fsD42t	feD42t	Gene	sizegen	fD42g	fsD42g	feD42g	scf	tD42_0h	tD42_24h	tD42_48h	t10.6_0h	t10.6_24h	t10.6_48h	t78.9_0h	t78.9_24h	t78.9_48h	t109.2_0h	t109.2_24h	t109.2_48h	t134.3_0h	t134.3_24h	t134.3_48h	t125.5_0h	t125.5_24h	t125.5_48h	t20.2_0h	t20.2_24h	genAs548	evalD42	fAs548	sAs548	eAs548	As548_0h	As548_24h	As548_48h	sseqid1	pos1	pident1	length1	evalue1	bitscore1	sseqid2	pos2	pident2	length2
TRINITY_DN183_c3_g1_i12	2434	4	NA	NA	NA	TRINITY_DN183_c3_g1	2955	NA	NA	NA	jcf7180001902299	0	1927	0.776	0.686	2.23	1044	0.656	1212	1475	0	1885	0.938	0	0.833	1084	0	0.562	0.958	0.064	1739	As548_TRINITY_DN517_c1_g1	0	NA	NA	NA	25563	26.75	6657	NA	NA	NA	NA	NA	NA	NA	NA	NA	NA
TRINITY_DN2440_c0_g1_i8	3160	4	NA	NA	NA	TRINITY_DN2440_c0_g1	5682	NA	NA	NA	jcf7180001789853	1.87	3589	0.892	2227	5.94	1106	2624	5748	1973	3.6	4804	1482	1114	3029	1593	2.06	4558	3281	2107	8016	As548_TRINITY_DN266_c1_g1	0	NA	NA	NA	18461	53869	32.9	chr6S	224220084	93151	146	4.69e-52	213	chr6S	224220228	91096	146
TRINITY_DN6116_c0_g1_i3	4328	4	NBSLRR	321	4304	TRINITY_DN6116_c0_g1	7802	NBSLRR	952	7093	jcf7180001534211	0.393	4191	2398	0	2.24	1116	0.431	4316	2358	0	1733	1813	0	0	0	0.624	3905	1701	0	2451	As548_TRINITY_DN4720_c0_g1	0	NBSLRR	993	4760	2397	18033	7852	NA	NA	NA	NA	NA	NA	NA	NA	NA	NA
TRINITY_DN10111_c0_g1_i5	1089	3	NA	NA	NA	TRINITY_DN10111_c0_g1	1738	NA	NA	NA	NA	0	0.614	0	0	0	0	0	0	0.145	0	0.314	0	0	1817	0	0.281	0.618	0	0	1826	As548_TRINITY_DN8252_c0_g1	0	NA	NA	NA	2997	6166	5098	NA	NA	NA	NA	NA	NA	NA	NA	NA	NA
TRINITY_DN1020_c0_g1_i2	3691	3	NA	NA	NA	TRINITY_DN1020_c0_g1	3722	NA	NA	NA	jcf7180001632637	0	1951	1853	2371	3862	3597	2047	3078	3448	2526	0.835	2442	1251	0	1986	2476	1489	1569	1494	5439	As548_TRINITY_DN161_c0_g1	0	NA	NA	NA	25363	16.81	10879	chr6S	561820827	81853	259	8.51e-53	215	chr6S	561820266	91304	69
TRINITY_DN10230_c0_g1_i3	4511	3	NA	NA	NA	TRINITY_DN10230_c0_g1	4832	NA	NA	NA	NA	1247	2348	0.811	0.253	1733	0.382	0.597	0.663	0.312	1.03	1634	0.587	0.411	3294	0.844	1509	2212	0.54	0.226	0.806	As548_TRINITY_DN7110_c0_g1	0	NA	NA	NA	7782	3668	2458	NA	NA	NA	NA	NA	NA	NA	NA	NA	NA
TRINITY_DN10315_c0_g1_i4	1993	3	NA	NA	NA	TRINITY_DN10315_c0_g1	2737	NA	NA	NA	NA	0.081	0.301	0.405	0.096	0.578	0.868	0	0.451	0.405	0	0.575	0.864	0.978	0.757	0.566	0.271	0.358	0.672	0.451	0.261	As548_TRINITY_DN9647_c0_g1	0	NA	NA	NA	0.43	1443	1.4	NA	NA	NA	NA	NA	NA	NA	NA	NA	NA
TRINITY_DN10929_c0_g1_i5	1119	3	NA	NA	NA	TRINITY_DN10929_c0_g1	1429	NA	NA	NA	NA	0.948	1445	0.185	1661	2058	0.052	0.46	0.46	0.249	0.098	1517	0.587	0.899	0.818	0.624	0.551	0.611	0.774	1741	0	As548_TRINITY_DN4782_c0_g1	0	NA	NA	NA	2158	1425	1036	NA	NA	NA	NA	NA	NA	NA	NA	NA	NA
TRINITY_DN11006_c0_g2_i1	3810	3	NA	NA	NA	TRINITY_DN11006_c0_g2	4525	NA	NA	NA	jcf7180001849375	0.176	0.277	0.695	0	0	1736	0	0.142	1028	0.054	0	1578	0.626	0.734	2.86	0.062	0	0.346	0	0.277	As548_TRINITY_DN9669_c0_g1	0	NA	NA	NA	2118	0.748	9195	NA	NA	NA	NA	NA	NA	NA	NA	NA	NA
TRINITY_DN11302_c0_g1_i2	1175	3	NA	NA	NA	TRINITY_DN11302_c0_g1	1384	NA	NA	NA	NA	0.23	0.12	0.672	1805	0.243	0.92	0	0.168	0.966	1.67	0.691	0.64	0.538	0.273	0.653	0	1875	1121	0	1771	As548_TRINITY_DN5731_c0_g1	0	NA	NA	NA	0.549	1601	4563	NA	NA	NA	NA	NA	NA	NA	NA	NA	NA
TRINITY_DN1184_c0_g1_i17	3745	3	NA	NA	NA	TRINITY_DN1184_c0_g1	4959	NA	NA	NA	NA	1341	0.903	2629	0.156	0	1922	0	0	1.88	0.38	0.359	1696	0.919	1272	2198	0.843	0.211	2384	0.365	0.814	As548_TRINITY_DN875_c1_g2	0	NA	NA	NA	4855	4794	7044	NA	NA	NA	NA	NA	NA	NA	NA	NA	NA
TRINITY_DN1263_c0_g1_i8	4273	3	NA	NA	NA	TRINITY_DN1263_c0_g1	4660	NA	NA	NA	NA	1301	0.578	2375	0.445	0.395	1809	0.646	0.371	1911	0.878	0.207	2.09	1153	0	2792	1498	0.646	0.367	0.333	0.569	As548_TRINITY_DN14011_c0_g1	0	NA	NA	NA	4805	4988	9582	NA	NA	NA	NA	NA	NA	NA	NA	NA	NA
TRINITY_DN13863_c0_g1_i6	1047	3	NA	NA	NA	TRINITY_DN13863_c0_g1	1935	NA	NA	NA	jcf7180001698846	0.434	0.735	0.973	0.53	0	0.093	0	2184	0	0	0	1194	0	2218	0.221	0.219	0	0.937	0	0	As548_TRINITY_DN41525_c0_g1	0	NA	NA	NA	0.819	1003	1309	NA	NA	NA	NA	NA	NA	NA	NA	NA	NA
TRINITY_DN1422_c0_g1_i36	2146	3	NA	NA	NA	TRINITY_DN1422_c0_g1	3659	NA	NA	NA	jcf7180001646273	0.596	2397	0	0	0.122	0	0.362	0	0	1323	0	0	2766	1.56	0	0	0	0	0.86	5502	As548_TRINITY_DN4682_c0_g1	0	NA	NA	NA	18521	20452	12109	chr6S	733416700	86184	152	3.07e-37	163	NA	NA	NA	NA
TRINITY_DN1422_c0_g1_i8	2146	3	NA	NA	NA	TRINITY_DN1422_c0_g1	3659	NA	NA	NA	jcf7180001646273	0	0	0.162	0	0.659	0	0.774	0	0	0	0	0.213	0	0.666	0.921	0.062	0.934	0.295	0.591	0	As548_TRINITY_DN4682_c0_g1	0	NA	NA	NA	18521	20452	12109	chr6S	733416700	86184	152	3.07e-37	163	NA	NA	NA	NA
TRINITY_DN1433_c0_g1_i4	1679	3	NA	NA	NA	TRINITY_DN1433_c0_g1	2881	NA	NA	NA	NA	0.041	0.434	0.591	0.253	0.142	0.475	0.02	0.982	0.55	0.434	0.036	1568	0.049	0.03	0.086	0.656	0.316	0	0.871	0.016	As548_TRINITY_DN728_c0_g1	0	NA	NA	NA	33944	33206	25571	NA	NA	NA	NA	NA	NA	NA	NA	NA	NA
TRINITY_DN14390_c0_g1_i6	1548	3	NA	NA	NA	TRINITY_DN14390_c0_g1	2534	NA	NA	NA	NA	0.447	0.434	1714	1.42	0.436	0.889	0	0.318	1485	0	0.548	1738	0.909	0.144	2313	0.957	0.618	1498	0	0.348	As548_TRINITY_DN3832_c0_g1	0	NA	NA	NA	1129	5005	7511	NA	NA	NA	NA	NA	NA	NA	NA	NA	NA
TRINITY_DN14736_c0_g1_i10	3439	3	NA	NA	NA	TRINITY_DN14736_c0_g1	3858	NA	NA	NA	NA	0.285	0	0.915	0	0	1478	0	0	0.706	0	0	0.501	0.293	0	0.595	0.957	0	0	0.172	0	As548_TRINITY_DN33487_c1_g1	0	NA	NA	NA	1718	0.422	2.72	NA	NA	NA	NA	NA	NA	NA	NA	NA	NA
TRINITY_DN15262_c0_g1_i4	10528	3	NA	NA	NA	TRINITY_DN15262_c0_g1	11233	NA	NA	NA	jcf7180001530542	0	0.06	0	0	0	0	0	0	0	0	0	0	0	0	0	0	0	0	0	0	As548_TRINITY_DN29790_c0_g1	0	NA	NA	NA	0.699	0.132	1.4	chr6S	627038989	96214	898	0	1469	chr6S	627040790	97027	841
TRINITY_DN1553_c0_g1_i7	2462	3	NA	NA	NA	TRINITY_DN1553_c0_g1	5571	NA	NA	NA	NA	1924	1481	2.34	0	2514	1829	0.078	3148	2513	1811	4669	1664	3451	2423	1756	4724	2451	1763	2526	2901	As548_TRINITY_DN2950_c0_g1	0	NA	NA	NA	15254	18859	8.41	NA	NA	NA	NA	NA	NA	NA	NA	NA	NA
TRINITY_DN1620_c0_g1_i8	1389	3	NA	NA	NA	TRINITY_DN1620_c0_g1	4369	NA	NA	NA	NA	1003	12.26	2815	7197	12073	5281	3662	17971	5951	5617	11699	5759	5992	11955	5153	9541	22.02	4157	4718	10838	As548_TRINITY_DN12181_c0_g1	0	NA	NA	NA	62874	82572	51074	chr6B	48058605	96729	214	1.57e-95	357	chr6B	48066857	96729	214
TRINITY_DN16369_c0_g1_i3	711	3	NA	NA	NA	TRINITY_DN16369_c0_g1	824	NA	NA	NA	NA	0	0	0.51	0	1571	1.22	0	0.946	0.696	0	0	0.992	0	0.53	0.211	0	0.527	1365	0.129	0	As548_TRINITY_DN21081_c1_g1	0	NA	NA	NA	3157	4759	6931	NA	NA	NA	NA	NA	NA	NA	NA	NA	NA
TRINITY_DN1934_c0_g1_i2	1401	3	NA	NA	NA	TRINITY_DN1934_c0_g1	3688	NA	NA	NA	jcf7180001913857	0.84	0.614	1239	0	0.122	1902	0	0	0.717	0	0	0.683	0.753	0.84	1747	0.936	0.583	0	0.494	0	As548_TRINITY_DN561_c0_g1	0	NA	NA	NA	14535	6474	16786	chr6S	145665752	99112	338	3.31e-171	608	chr6S	145661460	94881	293
TRINITY_DN1942_c1_g1_i4	1734	3	NA	NA	NA	TRINITY_DN1942_c1_g1	2094	NA	NA	NA	NA	0.176	1108	2224	0.277	1176	2026	0	0.398	2077	3925	0	2261	0.87	0.129	0.873	2071	1594	2751	1354	0	As548_TRINITY_DN590_c1_g1	0	NA	NA	NA	10409	6175	9582	chr6B	68013699	85235	149	3.78e-34	152	chr6B	720008712	84768	151
TRINITY_DN21123_c0_g1_i5	2668	3	NA	NA	NA	TRINITY_DN21123_c0_g1	2804	NA	NA	NA	jcf7180001784277	0	0.963	0.985	0.349	0.639	0.465	0	0.363	0.883	0	0.081	0.981	1261	0	1.18	1457	0.878	0.448	0.537	0	As548_TRINITY_DN5599_c0_g1	0	NA	NA	NA	3826	2595	4893	chr6B	69460821	97297	37	2.45e-07	63.9	NA	NA	NA	NA
TRINITY_DN22789_c0_g1_i6	5797	3	NA	NA	NA	TRINITY_DN22789_c0_g1	6534	NA	NA	NA	jcf7180001701556	0	0	0.486	0	0.041	0.393	0	0	0.208	0	0	0	0	0	0.336	0	0	0	0.054	0	As548_TRINITY_DN77009_c0_g1	1.77e-10	NA	NA	NA	0	0	0.307	chr6S	287048619	95666	323	3.67e-143	516	chr6S	766553417	92941	85
TRINITY_DN2302_c0_g1_i23	2317	3	NA	NA	NA	TRINITY_DN2302_c0_g1	2875	NA	NA	NA	NA	0	0.313	0.405	1492	1541	0	0	0.884	0.114	0	0	0	0.85	0	0	0	0.126	1131	3418	0	As548_TRINITY_DN25781_c0_g1	0	NA	NA	NA	5584	8568	4017	NA	NA	NA	NA	NA	NA	NA	NA	NA	NA
TRINITY_DN2352_c0_g1_i11	5015	3	NA	NA	NA	TRINITY_DN2352_c0_g1	5949	NA	NA	NA	jcf7180001929588	0.054	0.686	0.266	0	0.193	0.269	0.548	0.442	0.197	0	0.575	0.299	0.528	1121	0.441	0.853	0.787	0.316	0.634	0.514	As548_TRINITY_DN12207_c0_g2	0	NA	NA	NA	1049	1768	1058	chr6B	720496807	93631	1099	0	1642	chr6B	720495666	93564	1010
TRINITY_DN2395_c0_g1_i4	1586	3	NA	NA	NA	TRINITY_DN2395_c0_g1	3085	NA	NA	NA	jcf7180001930483	0.42	0.747	1.61	0	0	1.55	0	0.212	1329	0	0	0.853	0.655	1.37	1775	1093	0.169	0	0.849	0	As548_TRINITY_DN1723_c0_g1	0	NA	NA	NA	6313	14866	14.51	chr6B	673068373	93.59	78	7.35e-23	115	chr6B	663040988	92105	76
TRINITY_DN25154_c0_g2_i4	1084	3	NA	NA	NA	TRINITY_DN25154_c0_g2	1511	NA	NA	NA	jcf7180001684061	1.07	0.927	1.1	1866	2788	1623	1.43	4431	1568	1507	2738	2069	1564	1431	1852	1155	1194	3444	3343	0	As548_TRINITY_DN45954_c0_g1	5.6e-144	NA	NA	NA	0	1935	0.546	NA	NA	NA	NA	NA	NA	NA	NA	NA	NA
TRINITY_DN2536_c0_g1_i10	1832	3	NA	NA	NA	TRINITY_DN2536_c0_g1	2584	NA	NA	NA	NA	0	1987	0	0	0	0.837	0	2627	0.343	0	1455	0	1975	1083	0.259	0.926	2016	0	3214	3099	As548_TRINITY_DN29684_c0_g2	0	NA	NA	NA	8421	12183	8877	NA	NA	NA	NA	NA	NA	NA	NA	NA	NA
TRINITY_DN25608_c0_g1_i1	1582	3	NA	NA	NA	TRINITY_DN25608_c0_g1	2240	NA	NA	NA	jcf7180001930691	0.352	0.831	0.602	1119	1247	0.589	0	1194	0.415	0	0.099	0.661	0.342	0.712	0.393	0.645	1096	0	0	0	As548_TRINITY_DN18143_c0_g1	6.44e-145	NA	NA	NA	3616	2032	4302	chr6S	415954861	90.96	177	3.02e-60	239	chr6S	186825978	100	44
TRINITY_DN2817_c0_g1_i11	5504	3	NA	NA	NA	TRINITY_DN2817_c0_g1	7051	NA	NA	NA	NA	0.19	0.566	0.672	0.891	0.507	0.548	0	0.593	0.727	0.325	0.108	0.779	0.616	0.598	0.739	0.499	0.485	0.897	0.193	0.324	As548_TRINITY_DN2191_c0_g1	0	NA	NA	NA	3856	4583	4006	NA	NA	NA	NA	NA	NA	NA	NA	NA	NA
TRINITY_DN31373_c0_g1_i12	1878	3	NA	NA	NA	TRINITY_DN31373_c0_g1	2729	NA	NA	NA	jcf7180001607967	0.366	0	0.707	0	0.568	0.682	0	0	0.395	0	0	0	0.714	0	0.71	1145	0.295	0	0.623	0	As548_TRINITY_DN25509_c0_g1	0	NA	NA	NA	0.1	0	0.626	chr6B	113766699	90909	88	5.02e-24	119	chr6B	113766696	92308	52
TRINITY_DN313_c0_g1_i18	1420	3	NA	NA	NA	TRINITY_DN313_c0_g1	3555	NA	NA	NA	NA	2805	6.13	7622	6018	1602	4.02	3868	6774	13294	3004	3493	7199	5992	4089	9817	5182	5275	9129	10114	5336	As548_TRINITY_DN868_c0_g1	1.39e-113	NA	NA	NA	7202	6369	16012	chr6B	718382871	100	127	6.24e-59	235	chr6B	307198185	93233	133
TRINITY_DN3189_c0_g1_i8	1496	3	NA	NA	NA	TRINITY_DN3189_c0_g1	3149	NA	NA	NA	NA	0	0.59	1819	0	0.811	2532	0.421	0.584	1309	0.705	0.655	2858	0.489	0	2102	0.208	0.197	0.774	0.752	0.743	As548_TRINITY_DN5633_c0_g1	0	NA	NA	NA	5205	2384	9867	NA	NA	NA	NA	NA	NA	NA	NA	NA	NA
TRINITY_DN32_c0_g1_i5	2527	3	NA	NA	NA	TRINITY_DN32_c0_g1	3975	NA	NA	NA	NA	0.325	1373	0.88	0	0.101	0	0	0	0.135	0	2281	0.395	0.391	0.613	0	0.499	0.007	0.082	0	0	As548_TRINITY_DN8055_c0_g1	0	NA	NA	NA	6383	8075	8899	NA	NA	NA	NA	NA	NA	NA	NA	NA	NA
TRINITY_DN3550_c0_g1_i9	1746	3	NA	NA	NA	TRINITY_DN3550_c0_g1	2543	NA	NA	NA	NA	3387	6274	2768	0.53	5808	2873	2027	0.38	1537	4348	2334	3.53	4252	0.772	1785	9417	3933	2914	4106	0.016	As548_TRINITY_DN9816_c0_g1	0	NA	NA	NA	38.42	38572	35415	NA	NA	NA	NA	NA	NA	NA	NA	NA	NA
TRINITY_DN37647_c0_g1_i6	1461	3	NA	NA	NA	TRINITY_DN37647_c0_g1	2103	NA	NA	NA	jcf7180001536280	0	0	0.359	0.542	0	1561	0.118	0	0.052	0	0	0.416	0	0	1046	0.042	0.084	0.122	0	0.514	As548_TRINITY_DN4363_c0_g1	1.54e-26	NA	NA	NA	2557	3334	7329	chr6S	527687375	91103	798	0	1053	chr6S	527690652	91006	656
TRINITY_DN3926_c0_g1_i11	3733	3	NA	NA	NA	TRINITY_DN3926_c0_g1	4485	NA	NA	NA	NA	0.325	4902	2398	0	4663	2119	0	5572	3.76	0.943	4884	1386	1183	3.71	2.15	1894	5521	0	0.419	4846	As548_TRINITY_DN1156_c0_g1	0	NA	NA	NA	3606	4882	4313	NA	NA	NA	NA	NA	NA	NA	NA	NA	NA
TRINITY_DN3926_c0_g1_i13	2679	3	NA	NA	NA	TRINITY_DN3926_c0_g1	4485	NA	NA	NA	NA	0.881	3938	3579	0.373	7.43	2243	2752	6995	4528	1746	5782	2453	2747	7428	2409	2164	7508	2.14	0.398	4435	As548_TRINITY_DN1156_c0_g1	0	NA	NA	NA	3606	4882	4313	NA	NA	NA	NA	NA	NA	NA	NA	NA	NA
TRINITY_DN4156_c0_g1_i9	3295	3	NA	NA	NA	TRINITY_DN4156_c0_g1	3883	NA	NA	NA	NA	0.095	0.879	0.429	0.481	0	0	0	0	0.208	0.943	0	0.651	0.655	0.326	0.691	0.853	0	1386	0	0	As548_TRINITY_DN8369_c0_g1	0	NA	NA	NA	7412	6289	5519	NA	NA	NA	NA	NA	NA	NA	NA	NA	NA
TRINITY_DN429_c0_g1_i4	2741	3	NA	NA	NA	TRINITY_DN429_c0_g1	6540	NA	NA	NA	jcf7180001892604	0.027	0.47	0.266	0.096	0.872	0.155	1498	0.124	0.239	1529	0.009	0.341	0.254	0.136	0.307	0.229	0.583	0.051	0.989	1391	As548_TRINITY_DN80_c0_g1	0	NA	NA	NA	252296	46155	94774	chr6S	725386630	98404	188	1.43e-87	331	chr6S	725386971	94086	186
TRINITY_DN4836_c0_g1_i7	5201	3	NA	NA	NA	TRINITY_DN4836_c0_g1	5881	NA	NA	NA	NA	0.217	0.554	0.243	0.132	1064	0.382	0	0.619	0.197	0.195	0.144	0.299	0.499	0.636	0.173	0.864	1032	0.153	0.247	0.593	As548_TRINITY_DN11407_c0_g1	5.68e-15	NA	NA	NA	1868	2604	2822	chr6S	627448262	75612	939	1.58e-121	444	chr6S	502099939	82418	91
TRINITY_DN51408_c0_g1_i2	232	3	NA	NA	NA	TRINITY_DN51408_c0_g1	559	NA	NA	NA	jcf7180001941843	0	18835	0	0	0	0	0	0	0	0	0	0	0	0	0	0	0	0	0	0	As548_TRINITY_DN11724_c0_g1	4.89e-61	NA	NA	NA	0	4002	0.137	chr6B	388448059	92945	326	5.08e-132	475	chr6B	341939241	92638	326
TRINITY_DN5285_c0_g1_i10	2076	3	NA	NA	NA	TRINITY_DN5285_c0_g1	2395	NA	NA	NA	NA	1775	2312	1876	1179	1865	1385	2575	1.68	2025	2375	1859	2314	1339	1378	2984	3236	1946	1661	2236	1834	As548_TRINITY_DN2152_c0_g1	0	NA	NA	NA	7652	6905	5588	NA	NA	NA	NA	NA	NA	NA	NA	NA	NA
TRINITY_DN5302_c0_g1_i11	2302	3	NA	NA	NA	TRINITY_DN5302_c0_g1	4795	NA	NA	NA	jcf7180001656125	0.474	0.831	0.29	0	0.537	0.868	0.098	0.557	0.042	0	0.207	0.363	0	0.303	0.211	0.281	0.302	1508	0	0	As548_TRINITY_DN4669_c0_g1	0	NA	NA	NA	2138	4724	3903	NA	NA	NA	NA	NA	NA	NA	NA	NA	NA
TRINITY_DN5343_c0_g1_i6	2782	3	NA	NA	NA	TRINITY_DN5343_c0_g1	3471	NA	NA	NA	NA	0	0	0.162	0	0	0	0	0	0	0.293	0	0	0	0	0.038	0	0	0	0	0	As548_TRINITY_DN47086_c0_g1	0	NA	NA	NA	1259	1882	2117	NA	NA	NA	NA	NA	NA	NA	NA	NA	NA
TRINITY_DN5967_c0_g1_i7	2928	3	NA	NA	NA	TRINITY_DN5967_c0_g1	3834	NA	NA	NA	jcf7180001608653	0.135	0.951	0.533	0	0.568	1023	0	0.212	1527	0.802	0.512	1429	0.616	0.235	1276	0.77	0.457	0	1.01	0.19	As548_TRINITY_DN9404_c0_g1	0	NA	NA	NA	6693	6096	7682	NA	NA	NA	NA	NA	NA	NA	NA	NA	NA
TRINITY_DN6116_c0_g1_i14	5402	3	NA	NA	NA	TRINITY_DN6116_c0_g1	7802	NBSLRR	952	7093	jcf7180001534211	0	0.915	0.058	0.313	2656	0.713	0	0.08	0.187	0.455	2029	0	0	0	0	1269	0.204	0	0	0	As548_TRINITY_DN4720_c0_g1	0	NBSLRR	993	4760	2397	18033	7852	NA	NA	NA	NA	NA	NA	NA	NA	NA	NA
TRINITY_DN6137_c0_g1_i1	1702	3	NA	NA	NA	TRINITY_DN6137_c0_g1	2018	NA	NA	NA	jcf7180001525475	0.854	2348	3799	1252	1429	3193	1988	1468	2067	0	1616	3701	0.938	1.06	3704	2945	2.36	0.469	0.688	2538	As548_TRINITY_DN539_c0_g5	0	NA	NA	NA	7982	9782	10549	chr6B	715696409	88927	289	7.2e-96	357	chr6B	715696196	93	100
TRINITY_DN6186_c0_g1_i2	3167	3	NA	NA	NA	TRINITY_DN6186_c0_g1	3245	NA	NA	NA	NA	0.854	0	2039	0	0.973	1168	0	1.22	1215	0	0.422	1.6	0.528	0.681	0.777	0.728	1.37	2191	0.236	0	As548_TRINITY_DN6055_c0_g1	0	NA	NA	NA	3626	4082	5451	NA	NA	NA	NA	NA	NA	NA	NA	NA	NA
TRINITY_DN6281_c0_g1_i49	1575	3	NA	NA	NA	TRINITY_DN6281_c0_g1	6682	NA	NA	NA	NA	2818	1.06	2826	5139	3315	1282	0	1733	2804	4391	4902	3285	1349	0.984	2754	1717	2873	5318	0	0.49	As548_TRINITY_DN9476_c0_g1	0	NA	NA	NA	4985	19678	7409	chr6B	506838473	80435	276	9.23e-50	206	chr6B	506838202	80072	276
TRINITY_DN63073_c0_g1_i2	442	3	NA	NA	NA	TRINITY_DN63073_c0_g1	839	NA	NA	NA	jcf7180001542931	0	1397	0	0	0	0	0	0	0	0	0	0	0	0	0	0	0	0	0	0	As548_TRINITY_DN893_c0_g1	6.82e-121	NA	NA	NA	3037	5348	5713	NA	NA	NA	NA	NA	NA	NA	NA	NA	NA
TRINITY_DN6636_c0_g1_i12	5042	3	NA	NA	NA	TRINITY_DN6636_c0_g1	6537	NA	NA	NA	NA	0.379	0.566	0	0.65	0.355	0.134	0	0	0.031	0	0.467	0.021	0.342	0.114	0.077	0.302	0	0.285	0.914	0	As548_TRINITY_DN25759_c0_g1	0	NA	NA	NA	5334	3422	3448	NA	NA	NA	NA	NA	NA	NA	NA	NA	NA
TRINITY_DN670_c0_g1_i24	2296	3	NA	NA	NA	TRINITY_DN670_c0_g1	2957	NA	NA	NA	jcf7180001889590	0.285	1469	0.637	1167	1105	1302	0.088	1459	1215	0	1293	1834	0.587	1386	2044	1519	1208	0.815	0	0	As548_TRINITY_DN1163_c0_g3	0	NA	NA	NA	5544	5401	8239	chr6B	719676231	96061	660	0	1098	chr6B	719677050	96755	339
TRINITY_DN6801_c0_g1_i3	6110	3	NA	NA	NA	TRINITY_DN6801_c0_g1	6449	NA	NA	NA	jcf7180001528017	0.42	1517	1378	0	1399	1375	0.607	0.929	0.955	0	1517	1877	1603	2112	1794	1228	2156	0.357	0	1004	As548_TRINITY_DN9149_c0_g1	0	NA	NA	NA	3267	3598	4222	NA	NA	NA	NA	NA	NA	NA	NA	NA	NA
TRINITY_DN6861_c0_g1_i26	3370	3	NA	NA	NA	TRINITY_DN6861_c0_g1	4178	NA	NA	NA	jcf7180001901393	0	2698	0.973	0	0	0.982	1136	0	0.519	0	1059	1546	1554	2355	1459	0.499	0.969	0	0.333	2.15	As548_TRINITY_DN10220_c0_g1	0	NA	NA	NA	1019	3026	1946	chr6S	159474119	96.04	303	3.94e-136	492	chr6S	159474476	92466	292
TRINITY_DN6885_c0_g1_i12	2142	3	NA	NA	NA	TRINITY_DN6885_c0_g1	3309	NA	NA	NA	NA	0.19	0	1135	0	0	1023	0.343	0	1.61	0	0	1642	0.205	0.197	1948	0.125	0	0.632	0	0	As548_TRINITY_DN13302_c0_g1	0	NA	NA	NA	1309	1654	6589	NA	NA	NA	NA	NA	NA	NA	NA	NA	NA
TRINITY_DN71116_c0_g2_i2	459	3	NA	NA	NA	TRINITY_DN71116_c0_g2	720	NA	NA	NA	NA	0	0	0.625	0	0	1147	0	0	0.187	0	0	0.491	0	0.401	1027	0	0	0	0	0	As548_TRINITY_DN19183_c2_g1	1.02e-83	NA	NA	NA	0	0.475	7386	NA	NA	NA	NA	NA	NA	NA	NA	NA	NA
TRINITY_DN7171_c0_g1_i6	3169	3	NA	NA	NA	TRINITY_DN7171_c0_g1	4063	NA	NA	NA	jcf7180001562614	0	0.458	0.22	0.842	2.21	0.816	1234	0	0.955	0	0	0.032	1564	0.341	0.662	1727	0.913	0.499	0	0.198	As548_TRINITY_DN1001_c0_g1	0	NA	NA	NA	5804	4126	3243	chr6B	32797147	89902	307	1.11e-106	394	NA	NA	NA	NA
TRINITY_DN7183_c0_g1_i8	2100	3	NA	NA	NA	TRINITY_DN7183_c0_g1	3813	NA	NA	NA	NA	1504	1517	0.811	0.698	0.811	1137	0.166	0.584	0.852	0.987	0	1152	2043	1613	0.749	1977	1292	0	0	0.727	As548_TRINITY_DN2239_c0_g1	0	NA	NA	NA	12337	7187	9332	chr6S	210235462	94099	322	1.29e-135	490	chr6S	186241902	85792	183
TRINITY_DN726_c0_g1_i12	1483	3	NA	NA	NA	TRINITY_DN726_c0_g1	2498	NA	NA	NA	jcf7180001584395	0	8237	1448	3623	7441	2398	6551	6801	2461	0	9032	0.107	4311	13015	1439	4755	9538	1824	6964	11605	As548_TRINITY_DN8975_c0_g1	5.6e-141	NA	NA	NA	21787	27902	15352	NA	NA	NA	NA	NA	NA	NA	NA	NA	NA
TRINITY_DN7542_c0_g1_i7	1620	3	NA	NA	NA	TRINITY_DN7542_c0_g1	2245	NA	NA	NA	jcf7180001942375	0.718	0	3429	0.686	0.304	2108	0.343	0	1568	0.423	0.467	2314	1124	0.515	3934	1041	0	0.051	1214	0	As548_TRINITY_DN924_c0_g2	0	NA	NA	NA	5814	2234	11892	chr6B	687555563	97333	525	0	891	chr6B	687554681	94212	501
TRINITY_DN7688_c0_g1_i29	6303	3	NA	NA	NA	TRINITY_DN7688_c0_g1	7239	NA	NA	NA	NA	0.257	1313	0.718	0.024	1561	1592	0	0.425	1433	0.976	0.916	1493	1623	1817	1334	1103	2135	1457	0	0.632	As548_TRINITY_DN7165_c0_g1	0	NA	NA	NA	4665	3941	5622	NA	NA	NA	NA	NA	NA	NA	NA	NA	NA
TRINITY_DN8124_c0_g1_i5	9945	3	NA	NA	NA	TRINITY_DN8124_c0_g1	10095	NA	NA	NA	NA	1639	1638	3498	0.217	1399	5767	0.157	0.752	4767	2624	1221	5.3	3265	1333	3349	2934	0.948	0.703	0	0.103	As548_TRINITY_DN2790_c0_g1	0	NA	NA	NA	2967	4416	3824	NA	NA	NA	NA	NA	NA	NA	NA	NA	NA
TRINITY_DN8908_c0_g1_i10	1215	3	NA	NA	NA	TRINITY_DN8908_c0_g1	2070	NA	NA	NA	NA	0	0.313	0.822	0	0.081	1033	0	1875	0.769	0	1329	1109	1.31	0.197	0	0.708	0.906	1182	1365	0.885	As548_TRINITY_DN3378_c0_g1	1.27e-151	NA	NA	NA	32975	3079	6009	NA	NA	NA	NA	NA	NA	NA	NA	NA	NA
TRINITY_DN8922_c0_g1_i7	4778	3	NA	NA	NA	TRINITY_DN8922_c0_g1	5070	NA	NA	NA	jcf7180001581637	0.054	0	0.347	0	0.223	0.258	0	0	0.177	0.466	0	0.288	0.469	0.394	0.288	0.281	0	0.122	0	0	As548_TRINITY_DN14495_c0_g1	0	NA	NA	NA	0.529	0.422	3403	chr6B	41202770	92174	115	4.27e-37	163	chr6B	41139498	88983	118
TRINITY_DN909_c0_g1_i10	2154	3	NA	NA	NA	TRINITY_DN909_c0_g1	2948	NA	NA	NA	jcf7180001705827	0	0.783	0	0.072	0	0	0	0	0	0	0.224	0	0	0.621	0.077	0	0	0	0.269	0.229	As548_TRINITY_DN90692_c0_g1	0	NA	NA	NA	2607	6659	6987	NA	NA	NA	NA	NA	NA	NA	NA	NA	NA
TRINITY_DN9350_c0_g1_i14	2314	3	NA	NA	NA	TRINITY_DN9350_c0_g1	2995	NA	NA	NA	NA	0.163	0	0.799	0.867	0	0.393	0	0	0.831	0	0	0.8	0.117	0.507	1075	0	0	0.489	0	0	As548_TRINITY_DN31225_c0_g1	0	NA	NA	NA	3746	4609	14055	NA	NA	NA	NA	NA	NA	NA	NA	NA	NA
TRINITY_DN937_c0_g1_i3	2655	3	NA	NA	NA	TRINITY_DN937_c0_g1	8312	NA	NA	NA	jcf7180001565297	0.827	3203	1297	0.421	0.831	0.527	1371	2635	1059	0	3187	0.597	0.782	0.628	1938	0.114	2.62	0.601	0.258	1304	As548_TRINITY_DN1288_c0_g4	0	NA	NA	NA	24994	10441	22863	chr6B	216355134	74607	1146	4.87e-113	416	chr6B	216356539	93478	184
TRINITY_DN9909_c0_g1_i5	3667	3	NA	NA	NA	TRINITY_DN9909_c0_g1	3901	NA	NA	NA	jcf7180001552043	0.583	0.698	0.313	0	0.172	0.909	0.392	0.354	0.405	0	1526	0.544	0.89	0.651	0.691	1113	0.52	1202	0.118	0.332	As548_TRINITY_DN10327_c0_g1	0	NA	NA	NA	2607	3246	3369	NA	NA	NA	NA	NA	NA	NA	NA	NA	NA
TRINITY_DN9909_c0_g1_i7	3671	3	NA	NA	NA	TRINITY_DN9909_c0_g1	3901	NA	NA	NA	jcf7180001552043	0	1.18	0.556	0	1024	0.651	0	0.46	0.706	0.434	0	0.587	0.587	1105	0.912	0.957	1.11	0	0.387	0.751	As548_TRINITY_DN10327_c0_g1	0	NA	NA	NA	2607	3246	3369	NA	NA	NA	NA	NA	NA	NA	NA	NA	NA
TRINITY_DN997_c0_g1_i11	3664	3	NA	NA	NA	TRINITY_DN997_c0_g1	4512	NA	NA	NA	jcf7180001928353	1125	0.747	1795	0.77	0.781	1695	0	0.195	1724	0	0.997	1472	1564	1022	2802	1.55	1363	0	1214	0	As548_TRINITY_DN3594_c0_g1	1.4e-94	NA	NA	NA	10349	6.14	6544	chr6S	126281406	96.81	627	0	1048	chr6S	126283743	98167	600
TRINITY_DN10024_c0_g1_i2	1223	2	NA	NA	NA	TRINITY_DN10024_c0_g1	2167	NA	NA	NA	NA	0	0.482	0.278	0	0.811	0.207	0	0.106	0.467	0	0.709	0.235	0.088	0.636	0.345	0.208	0.562	0	0	0.553	As548_TRINITY_DN15601_c0_g1	4.2e-62	NA	NA	NA	0.569	0.405	0.501	chr6S	573521584	87931	58	1.89e-07	63.9	NA	NA	NA	NA
TRINITY_DN1002_c3_g1_i3	2150	2	NA	NA	NA	TRINITY_DN1002_c3_g1	2283	NA	NA	NA	NA	1111	0.397	2409	0	0.203	1912	0	0	0.561	0	0.224	2496	0.792	0.22	3445	0.708	0.407	0.509	0.29	0	As548_TRINITY_DN14955_c0_g1	0	NA	NA	NA	3227	2393	7943	chr6S	175151584	90511	137	1.89e-42	180	NA	NA	NA	NA
TRINITY_DN1002_c4_g1_i11	772	2	NA	NA	NA	TRINITY_DN1002_c4_g1	1909	NA	NA	NA	jcf7180001891009	1233	1614	1077	0	0.436	1375	0	0.478	0.706	0.336	0.368	1109	0.459	0.931	1219	0.926	0.119	0	0	0	As548_TRINITY_DN981_c0_g1	7.93e-64	NA	NA	NA	17522	27761	5064	chr6S	128921475	90429	303	6.71e-106	390	chr6S	47826243	80457	394
TRINITY_DN1003_c0_g1_i9	3304	2	NA	NA	NA	TRINITY_DN1003_c0_g1	3890	NA	NA	NA	jcf7180001646004	3997	10297	12266	3081	7633	13694	3917	6.04	11674	3069	6976	13779	10225	12924	16697	7419	10641	6276	0.365	5636	As548_TRINITY_DN1403_c0_g1	0	NA	NA	NA	50078	60229	37179	chr6S	443255978	80714	140	2.6e-18	100	chr6S	440871195	83696	92
TRINITY_DN10042_c0_g1_i2	1702	2	NA	NA	NA	TRINITY_DN10042_c0_g1	2323	NA	NA	NA	NA	0.081	0.434	1077	0	0.446	1199	0.666	0.991	1.62	0	0.224	1066	0.899	0.962	1008	0.614	0.548	0.245	0.462	0.285	As548_TRINITY_DN9464_c0_g1	0	NA	NA	NA	0.999	1821	2151	NA	NA	NA	NA	NA	NA	NA	NA	NA	NA
TRINITY_DN100496_c0_g1_i10	2402	2	NA	NA	NA	TRINITY_DN100496_c0_g1	2668	NBSLRR	47	1463	jcf7180001607182	0.176	0	0.301	0.084	0	0.258	0	0.115	0.945	0.054	0.269	0.416	0.176	0	0.451	0.614	0.358	0.102	0.516	0.775	As548_TRINITY_DN4306_c0_g2	0	NBSLRR	244	2123	0.33	0.167	1115	NA	NA	NA	NA	NA	NA	NA	NA	NA	NA
TRINITY_DN10049_c0_g1_i1	1944	2	NA	NA	NA	TRINITY_DN10049_c0_g1	2074	NA	NA	NA	NA	0.447	1144	1668	1589	0.446	0.506	0.813	1972	0	0	2882	0.352	0.303	3831	2111	1405	1461	2.15	0	4609	As548_TRINITY_DN1002_c0_g1	0	NA	NA	NA	9.33	20795	9969	NA	NA	NA	NA	NA	NA	NA	NA	NA	NA
TRINITY_DN1004_c0_g1_i11	1184	2	NA	NA	NA	TRINITY_DN1004_c0_g1	3632	NA	NA	NA	jcf7180001524264	0.732	1602	0.822	0	0.547	1127	2321	1822	1091	0	2.29	0.992	1173	1174	1708	1384	0.997	0	1193	0.846	As548_TRINITY_DN1190_c0_g2	1.81e-122	NA	NA	NA	7133	4416	9.98	chr6B	182113568	90297	505	0	652	chr6B	182118034	91228	456
TRINITY_DN10051_c2_g1_i1	661	2	NA	NA	NA	TRINITY_DN10051_c2_g1	892	NA	NA	NA	NA	0	0	0.266	0	1004	1385	1038	0.522	1.62	0	0	0.48	0.186	0	0.509	0.541	1075	0	0	0	As548_TRINITY_DN5979_c0_g1	5.66e-117	NA	NA	NA	0.759	1091	1821	NA	NA	NA	NA	NA	NA	NA	NA	NA	NA
TRINITY_DN1006_c0_g1_i2	2084	2	NA	NA	NA	TRINITY_DN1006_c0_g1	2345	NA	NA	NA	NA	0.298	0.711	0.429	0	0.74	0.155	0	0.31	0.145	0	0	0.267	0.313	0	0.182	0.416	0.386	0.336	1204	0	As548_TRINITY_DN2472_c0_g1	0	NA	NA	NA	2238	3633	3539	NA	NA	NA	NA	NA	NA	NA	NA	NA	NA
TRINITY_DN10075_c0_g1_i2	1798	2	NA	NA	NA	TRINITY_DN10075_c0_g1	2319	NA	NA	NA	NA	1043	1999	1124	1661	1.47	1013	1097	0.761	1.34	2895	0.907	0.779	2033	0.485	1766	1145	0.794	0.377	1945	0.719	As548_TRINITY_DN3386_c2_g2	0	NA	NA	NA	5474	6087	5576	NA	NA	NA	NA	NA	NA	NA	NA	NA	NA
TRINITY_DN10105_c0_g1_i10	3340	2	NA	NA	NA	TRINITY_DN10105_c0_g1	3537	NA	NA	NA	NA	0.528	1.06	0.417	0.181	0.953	0.372	0	0	0	0.239	0	0.523	1017	0	0.403	1145	0.611	0	0	0	As548_TRINITY_DN11015_c0_g1	0	NA	NA	NA	3586	3923	2549	NA	NA	NA	NA	NA	NA	NA	NA	NA	NA
TRINITY_DN1010_c0_g1_i11	1404	2	NA	NA	NA	TRINITY_DN1010_c0_g1	7383	NA	NA	NA	NA	0	0	0.058	3442	0.821	0	0	4917	0.436	0	0.512	0	0.411	1651	0.374	2081	1686	0	0.914	0	As548_TRINITY_DN739_c2_g2	0	NA	NA	NA	14625	26873	16888	chr6S	767892118	95	40	2.34e-06	62.1	NA	NA	NA	NA
TRINITY_DN10155_c0_g1_i5	1496	2	NA	NA	NA	TRINITY_DN10155_c0_g1	1896	NA	NA	NA	NA	0	0.939	0.278	0	0	0.32	0	0	0.935	0.228	0.296	0.384	0.538	0	0.403	0.187	0	0.071	0.226	0.237	As548_TRINITY_DN6332_c0_g2	0	NA	NA	NA	1209	3088	0.558	NA	NA	NA	NA	NA	NA	NA	NA	NA	NA
TRINITY_DN1025_c0_g1_i5	2482	2	NA	NA	NA	TRINITY_DN1025_c0_g1	2980	NA	NA	NA	NA	0	0.59	0	0	0	0	0	0	0	0	0.386	0	0	0.394	0.058	0	0.19	0	0	0.909	As548_TRINITY_DN4164_c1_g1	0	NA	NA	NA	0.28	3835	3.38	NA	NA	NA	NA	NA	NA	NA	NA	NA	NA
TRINITY_DN10267_c0_g1_i15	1504	2	NA	NA	NA	TRINITY_DN10267_c0_g1	3029	NA	NA	NA	NA	0.461	0.819	0.336	0.493	1703	1064	0	0.92	0.457	0.835	0.799	0.715	0.909	0.848	0.998	0.479	1356	0.998	0	0	As548_TRINITY_DN18739_c0_g1	0	NA	NA	NA	1768	2674	2959	NA	NA	NA	NA	NA	NA	NA	NA	NA	NA
TRINITY_DN1026_c1_g1_i4	1497	2	NA	NA	NA	TRINITY_DN1026_c1_g1	2017	NA	NA	NA	NA	0	3203	0.197	0.903	0.436	0.145	0	1318	0.187	0	0	0	0.645	0.53	0.585	0.77	0.885	0.927	0	0.877	As548_TRINITY_DN1485_c1_g2	0	NA	NA	NA	13046	7829	4882	NA	NA	NA	NA	NA	NA	NA	NA	NA	NA
TRINITY_DN1027_c0_g1_i7	1831	2	NA	NA	NA	TRINITY_DN1027_c0_g1	2498	NA	NA	NA	NA	1003	1806	0	0	0	1447	0.46	0	0.685	0	0	0.832	0	1643	1065	0.021	0.133	0	1677	0	As548_TRINITY_DN786_c0_g2	0	NA	NA	NA	4555	25817	28564	NA	NA	NA	NA	NA	NA	NA	NA	NA	NA
TRINITY_DN10291_c0_g1_i12	1644	2	NA	NA	NA	TRINITY_DN10291_c0_g1	2841	NA	NA	NA	jcf7180001521902	0	0.686	0	0	0.527	0	0	0	0	0	0	0	0	0.098	0	0.156	0	0	0.054	0	As548_TRINITY_DN7534_c0_g1	4.96e-137	NA	NA	NA	6084	7926	12803	chr6B	657284626	96667	240	1.67e-108	399	chr6B	657284295	99476	191
TRINITY_DN102_c0_g1_i15	3416	2	NA	NA	NA	TRINITY_DN102_c0_g1	5041	NA	NA	NA	jcf7180001525088	1789	2806	2015	0.241	1125	2274	0	0	2025	0	0	2133	2835	3369	2322	0	1.7	1304	0	0	As548_TRINITY_DN1806_c0_g1	0	NA	NA	NA	10499	11928	8034	chr6B	395675652	96569	204	6.57e-90	339	chr6B	240324884	89.96	249
TRINITY_DN102_c0_g1_i3	3432	2	NA	NA	NA	TRINITY_DN102_c0_g1	5041	NA	NA	NA	jcf7180001525088	5406	5949	1911	3623	5261	1943	5866	6138	2139	3296	7075	2229	6315	5239	2303	5.39	4608	1202	0	5012	As548_TRINITY_DN1806_c0_g1	0	NA	NA	NA	10499	11928	8034	chr6B	395675652	96569	204	6.57e-90	339	chr6B	240324884	89.96	249
TRINITY_DN10348_c0_g1_i1	980	2	NA	NA	NA	TRINITY_DN10348_c0_g1	1808	NA	NA	NA	NA	0	0.301	0	0	0	0.062	0	0	0.415	0	0.368	0.619	0.381	0	0.163	0.291	0	0	0	0	As548_TRINITY_DN22148_c0_g3	1.13e-136	NA	NA	NA	17811	10336	11118	NA	NA	NA	NA	NA	NA	NA	NA	NA	NA
TRINITY_DN10398_c0_g1_i33	4537	2	NA	NA	NA	TRINITY_DN10398_c0_g1	4862	NA	NA	NA	NA	0.921	1505	2224	0.566	1196	1891	0.568	1893	1599	2028	2721	3498	2151	2181	3743	1415	2416	1223	0	1115	As548_TRINITY_DN310_c0_g5	0	NA	NA	NA	0.549	2718	2868	NA	NA	NA	NA	NA	NA	NA	NA	NA	NA
TRINITY_DN10402_c0_g1_i6	293	2	NA	NA	NA	TRINITY_DN10402_c0_g1	2885	NA	NA	NA	NA	0	0	2062	0	0	0	0	0	0	0	0	0	4936	0	0	0	0	0	0	0	As548_TRINITY_DN1259_c0_g1	8.32e-145	NA	NA	NA	14575	12535	2014	chr6S	587781663	92754	345	2.71e-136	492	chr6S	587779334	95222	293
TRINITY_DN10422_c0_g2_i10	2119	2	NA	NA	NA	TRINITY_DN10422_c0_g2	2736	NA	NA	NA	NA	0	0	0.475	0.12	0	0.217	0	0.363	0	0.239	0.054	0.725	0	0.098	0.173	0	0	0	0.14	0	As548_TRINITY_DN7295_c0_g1	0	NA	NA	NA	2807	0.906	9798	NA	NA	NA	NA	NA	NA	NA	NA	NA	NA
TRINITY_DN10432_c0_g1_i3	835	2	NA	NA	NA	TRINITY_DN10432_c0_g1	1614	NA	NA	NA	NA	0.447	2421	0	0	0.72	0	0.666	0.902	0.156	0	1024	0.053	0.557	2052	0.058	0.187	1011	0	0	0	As548_TRINITY_DN59296_c0_g1	2.96e-97	NA	NA	NA	0	22281	0	NA	NA	NA	NA	NA	NA	NA	NA	NA	NA
TRINITY_DN10439_c0_g1_i11	5028	2	NA	NA	NA	TRINITY_DN10439_c0_g1	5522	NA	NA	NA	NA	0.217	0.626	0.417	0	0	0.475	0	0.425	0.82	0	0	0.576	0.293	0.75	0.614	0.832	1243	0	0	0.095	As548_TRINITY_DN4989_c0_g1	0	NA	NA	NA	7312	10459	6316	NA	NA	NA	NA	NA	NA	NA	NA	NA	NA
TRINITY_DN10508_c0_g1_i15	1805	2	NA	NA	NA	TRINITY_DN10508_c0_g1	2760	NA	NA	NA	NA	0.515	0.229	0.591	0.277	0.355	0.589	0	0.363	0.249	0	0.305	0.469	0.381	0	0.653	0.666	0.52	0	0	0	As548_TRINITY_DN12350_c0_g1	0	NA	NA	NA	1638	1135	3.3	NA	NA	NA	NA	NA	NA	NA	NA	NA	NA
TRINITY_DN10509_c0_g1_i4	2186	2	NA	NA	NA	TRINITY_DN10509_c0_g1	2374	NA	NA	NA	NA	0.393	0.903	0.869	1216	0.801	0.444	0.215	1114	1724	0.488	1248	1493	0.88	1348	1478	0.978	1728	1.07	0.15	0	As548_TRINITY_DN23057_c0_g2	0	NA	NA	NA	1718	2762	2743	NA	NA	NA	NA	NA	NA	NA	NA	NA	NA
TRINITY_DN10511_c0_g1_i4	1089	2	NA	NA	NA	TRINITY_DN10511_c0_g1	1757	NA	NA	NA	NA	0	0.723	1019	0	0.385	2553	0	0	0.436	0	0.682	1664	1632	0.924	1161	0.427	0	1518	1161	0	As548_TRINITY_DN3691_c0_g1	0	NA	NA	NA	13556	9447	17685	NA	NA	NA	NA	NA	NA	NA	NA	NA	NA
TRINITY_DN10550_c0_g1_i2	1379	2	NA	NA	NA	TRINITY_DN10550_c0_g1	1684	NA	NA	NA	NA	1287	2589	0.371	0	0	0	1165	0.814	0.187	0.878	0	0	0	0	0	0.135	0.246	0	0.344	0	As548_TRINITY_DN7040_c0_g1	0	NA	NA	NA	2487	7011	8933	NA	NA	NA	NA	NA	NA	NA	NA	NA	NA
TRINITY_DN1061_c0_g2_i1	1196	2	NA	NA	NA	TRINITY_DN1061_c0_g2	1299	NA	NA	NA	NA	0.461	1301	4344	0	0.872	3338	0	0.46	3313	0	0.404	2506	0.381	2105	6737	0.801	0.625	1732	0	0.395	As548_TRINITY_DN18047_c0_g1	0	NA	NA	NA	0.1	0.273	1263	NA	NA	NA	NA	NA	NA	NA	NA	NA	NA
TRINITY_DN10622_c0_g1_i1	3959	2	NA	NA	NA	TRINITY_DN10622_c0_g1	4102	NA	NA	NA	jcf7180001538610	0	4034	1.61	0.385	3558	1933	1949	3352	1361	2646	2846	1013	2512	2794	0.902	2102	3659	3994	0.419	1209	As548_TRINITY_DN496_c0_g2	0	NA	NA	NA	8131	9175	5041	chr6S	108600566	93694	111	9.59e-38	165	chr6S	108600955	87671	73
TRINITY_DN10650_c1_g1_i2	277	2	NA	NA	NA	TRINITY_DN10650_c1_g1	639	NA	NA	NA	NA	0	18619	2965	0	2909	0	0	20995	0	0	13.8	0	1632	17816	0.595	0	0	0	0	0	As548_TRINITY_DN7198_c0_g2	1.56e-61	NA	NA	NA	1079	9773	5849	NA	NA	NA	NA	NA	NA	NA	NA	NA	NA
TRINITY_DN10773_c0_g2_i4	3167	2	NBSLRR	1126	2385	TRINITY_DN10773_c0_g2	3605	NBSLRR	1472	2731	jcf7180001776288	0.474	1072	0.695	0.457	0.405	0.63	0.215	0.23	0.789	0.412	0.781	0.715	0.616	0.939	1084	1165	1236	0	0	0.427	As548_TRINITY_DN2975_c0_g1	0	NBSLRR	1322	4454	121513	158845	73562	NA	NA	NA	NA	NA	NA	NA	NA	NA	NA
TRINITY_DN1078_c0_g1_i10	2361	2	NA	NA	NA	TRINITY_DN1078_c0_g1	2868	NA	NA	NA	NA	0.772	0	1.39	0	0	1705	0	0.345	1288	1312	0.808	1504	0.547	0.409	1622	0.926	0.183	2119	0.279	0	As548_TRINITY_DN7096_c0_g1	0	NA	NA	NA	18251	10784	28075	chr6S	233462221	84028	144	4.05e-30	139	chr6S	233468551	79054	148
TRINITY_DN1078_c0_g1_i6	2295	2	NA	NA	NA	TRINITY_DN1078_c0_g1	2868	NA	NA	NA	NA	0.759	0.241	3035	2527	1551	6087	0	0.849	4507	0.998	1095	4682	2561	0.924	6765	3246	0.112	0.54	2536	0.292	As548_TRINITY_DN7096_c0_g1	0	NA	NA	NA	18251	10784	28075	chr6S	233462221	84028	144	4.05e-30	139	chr6S	233468551	79054	148
TRINITY_DN1080_c0_g1_i6	973	2	NA	NA	NA	TRINITY_DN1080_c0_g1	1429	NA	NA	NA	NA	0.054	1349	0.718	0	0.345	1716	0	0	0.82	0	0.62	1077	0.968	1242	1766	1009	0.288	0.469	1268	0	As548_TRINITY_DN14833_c0_g1	1.43e-164	NA	NA	NA	5494	3439	9.07	NA	NA	NA	NA	NA	NA	NA	NA	NA	NA
TRINITY_DN1083_c0_g1_i14	1402	2	NA	NA	NA	TRINITY_DN1083_c0_g1	2112	NA	NA	NA	jcf7180001937904	0	0.566	0	0	0	0	1224	0.451	0.55	0.781	0	0	0	0.273	0.058	0.073	0.4	0	0	0	As548_TRINITY_DN2023_c0_g1	5.9e-165	NA	NA	NA	7013	3897	4916	chr6B	117708918	97391	115	6.25e-47	195	chr6B	45575153	98.02	101
TRINITY_DN1084_c1_g1_i16	2306	2	NA	NA	NA	TRINITY_DN1084_c1_g1	2998	NA	NA	NA	jcf7180001903550	0	0.337	0.012	0	0.122	0.382	0	0.044	0.218	0	0.081	0.523	0.323	0.182	0.211	0.052	0.548	0	0.312	0	As548_TRINITY_DN7850_c0_g1	0	NA	NA	NA	2218	5137	7784	chr6S	756997674	97273	110	1.49e-44	187	chr6S	756997104	96117	103
TRINITY_DN10854_c0_g1_i1	678	2	NA	NA	NA	TRINITY_DN10854_c0_g1	678	NA	NA	NA	NA	0	1445	0.185	0	0.253	0.041	0	0.212	0.343	0	0	0.192	0.283	0.151	0.115	0	0.379	0	0	0	As548_TRINITY_DN23971_c0_g1	0	NA	NA	NA	0.28	2771	0.854	NA	NA	NA	NA	NA	NA	NA	NA	NA	NA
TRINITY_DN10858_c0_g1_i5	1388	2	NA	NA	NA	TRINITY_DN10858_c0_g1	1543	NA	NA	NA	jcf7180001558109	0.935	1409	1923	2227	2.94	0.951	2438	1.99	1423	1.03	1481	0.97	2141	2332	2073	2539	0.92	1926	2483	1115	As548_TRINITY_DN16076_c0_g1	0	NA	NA	NA	1498	2744	2322	NA	NA	NA	NA	NA	NA	NA	NA	NA	NA
TRINITY_DN1087_c1_g1_i11	1090	2	NA	NA	NA	TRINITY_DN1087_c1_g1	1773	NA	NA	NA	NA	0.623	2071	0.741	0.505	2058	0.899	0	0	0.852	0	1149	0.938	1.31	0	0.749	0	0	0	2515	2925	As548_TRINITY_DN7264_c0_g1	8.62e-133	NA	NA	NA	14705	18525	9628	NA	NA	NA	NA	NA	NA	NA	NA	NA	NA
TRINITY_DN1087_c1_g1_i12	1090	2	NA	NA	NA	TRINITY_DN1087_c1_g1	1773	NA	NA	NA	NA	0.23	0.686	0.336	0	1592	0	1831	0	0.291	2548	1499	0.299	0.762	0	0.163	0	0	0.581	0.408	0.64	As548_TRINITY_DN7264_c0_g1	8.62e-133	NA	NA	NA	14705	18525	9628	NA	NA	NA	NA	NA	NA	NA	NA	NA	NA
TRINITY_DN1091_c0_g1_i36	1564	2	NA	NA	NA	TRINITY_DN1091_c0_g1	4176	NA	NA	NA	NA	0.027	0.638	0.394	0	0.284	0	0	0.363	0.966	0	0	0.096	0.108	0	0.115	0	0.4	0	0	0	As548_TRINITY_DN691_c0_g2	0	NA	NA	NA	8871	11.33	13599	chr6S	779957471	95.05	101	4.54e-36	159	chr6S	779957570	95	100
TRINITY_DN10921_c0_g1_i5	749	2	NA	NA	NA	TRINITY_DN10921_c0_g1	1927	NA	NA	NA	jcf7180001892134	6693	7768	9845	22928	1.46	8805	8999	4661	7904	4.24	5091	9566	10.44	5421	21025	10.28	6848	2741	28385	1036	As548_TRINITY_DN20933_c0_g2	3.42e-122	NA	NA	NA	0	0.598	0.683	chr6S	723653230	89161	286	1.15e-93	350	chr6S	723652986	98	50
TRINITY_DN10921_c0_g1_i8	713	2	NA	NA	NA	TRINITY_DN10921_c0_g1	1927	NA	NA	NA	jcf7180001892134	60187	60251	42868	63259	70979	32193	54623	83335	36039	51494	61781	37967	51281	35949	41081	65624	41981	17035	123985	53969	As548_TRINITY_DN20933_c0_g2	3.42e-122	NA	NA	NA	0	0.598	0.683	chr6S	723653230	89161	286	1.15e-93	350	chr6S	723652986	98	50
TRINITY_DN10924_c0_g1_i11	1350	2	NA	NA	NA	TRINITY_DN10924_c0_g1	2649	NA	NA	NA	NA	0	0	0.347	0	0	0	0	0.822	0.114	0	0	0.043	0.254	0.242	0.058	0	0.239	0.734	2719	0	As548_TRINITY_DN39378_c0_g2	0	NA	NA	NA	32286	37569	13656	chr6S	29942923	89011	91	2.93e-21	110	chr6S	29942964	95455	44
TRINITY_DN109285_c0_g1_i1	663	2	NA	NA	NA	TRINITY_DN109285_c0_g1	663	NA	NA	NA	jcf7180001941851	1043	1421	1.1	0	1592	1995	0	0.999	1309	0	1419	1504	2063	2158	0.921	1498	1967	0.754	0	0	As548_TRINITY_DN538_c0_g3	0	NA	NA	NA	1498	1372	0.216	chr6S	43279518	80769	520	6.34e-102	375	chr6S	43280181	92135	89
TRINITY_DN10937_c0_g1_i7	1794	2	NA	NA	NA	TRINITY_DN10937_c0_g1	2929	NA	NA	NA	jcf7180001941147	0.488	0.807	0.51	0	0.689	0.331	0	1831	0.114	0.163	0.215	0.437	0.616	1174	0.259	0.395	0.098	0.041	0.15	1668	As548_TRINITY_DN4836_c0_g1	0	NA	NA	NA	0.829	1557	2447	chr6B	156266045	98682	759	0	1347	chr6B	156266528	98684	532
TRINITY_DN1093_c0_g1_i1	1742	2	NA	NA	NA	TRINITY_DN1093_c0_g1	3404	NA	NA	NA	jcf7180001723582	4444	2168	4795	2082	1186	10035	0	0	7374	0	0	0	7664	2779	5134	6514	2121	4819	0.57	0	As548_TRINITY_DN54444_c0_g1	0	NA	NA	NA	25074	16.81	29122	NA	NA	NA	NA	NA	NA	NA	NA	NA	NA
TRINITY_DN1093_c0_g1_i5	2749	2	NA	NA	NA	TRINITY_DN1093_c0_g1	3404	NA	NA	NA	jcf7180001723582	4918	2818	6035	1.95	3355	10252	2664	1671	9.69	9162	2532	8702	9257	3165	7581	8303	1925	4666	4116	1708	As548_TRINITY_DN54444_c0_g1	0	NA	NA	NA	25074	16.81	29122	NA	NA	NA	NA	NA	NA	NA	NA	NA	NA
TRINITY_DN10951_c1_g1_i4	540	2	NA	NA	NA	TRINITY_DN10951_c1_g1	1006	NA	NA	NA	NA	0	0.674	0.718	0	0	1292	0	0	2108	0	0	1642	0	0.401	0.557	0	0	2099	0	0	As548_TRINITY_DN19088_c0_g1	1.97e-47	NA	NA	NA	22047	4979	7989	NA	NA	NA	NA	NA	NA	NA	NA	NA	NA
TRINITY_DN10975_c0_g1_i1	432	2	NA	NA	NA	TRINITY_DN10975_c0_g1	713	NA	NA	NA	jcf7180001796184	0	1.65	2154	0	1946	5839	0	0	2056	0	0	3.05	3509	4346	1315	4516	8667	0	0	9225	As548_TRINITY_DN3988_c0_g1	4.62e-97	NA	NA	NA	3986	4.82	3915	chr6S	772236001	88158	76	3.59e-15	87.9	chr6S	772270281	88158	76
TRINITY_DN10990_c0_g1_i1	1852	2	NA	NA	NA	TRINITY_DN10990_c0_g1	2186	NA	NA	NA	NA	0.352	0.662	0.799	0.746	0.152	0.393	0	0.142	0.644	0.011	0	0.501	0.655	0.25	0.403	0.645	0.077	0	0.204	0.877	As548_TRINITY_DN7891_c0_g1	0	NA	NA	NA	1079	1407	1582	NA	NA	NA	NA	NA	NA	NA	NA	NA	NA
TRINITY_DN11012_c0_g1_i1	291	2	NA	NA	NA	TRINITY_DN11012_c0_g1	291	NA	NA	NA	NA	0	0	2571	0	0	0	0	0	0	0	0	0	3167	4308	0	0	1637	0	0	0	As548_TRINITY_DN92943_c0_g1	4.39e-09	NA	NA	NA	0.909	0.73	0.193	NA	NA	NA	NA	NA	NA	NA	NA	NA	NA
TRINITY_DN11025_c0_g1_i6	2554	2	NA	NA	NA	TRINITY_DN11025_c0_g1	3069	NA	NA	NA	NA	0	1951	1008	1.48	0	0	0	0.035	0.166	0.434	0.198	0	0.44	1658	0.24	0	1601	0	0.849	1573	As548_TRINITY_DN12107_c0_g1	0	NA	NA	NA	2837	1856	0.854	NA	NA	NA	NA	NA	NA	NA	NA	NA	NA
TRINITY_DN11028_c0_g1_i12	1821	2	NA	NA	NA	TRINITY_DN11028_c0_g1	2438	NA	NA	NA	jcf7180001889808	1165	0.482	1436	4164	2261	1829	2184	0.486	1392	2223	0.808	2197	0.567	1227	1027	0.77	0.316	1885	1548	0.198	As548_TRINITY_DN20894_c0_g1	7.53e-95	NA	NA	NA	8581	5331	4939	chr6B	631947344	89903	822	0	1013	chr6B	631947204	96154	234
TRINITY_DN11033_c0_g1_i1	4267	2	NA	NA	NA	TRINITY_DN11033_c0_g1	5142	NA	NA	NA	NA	0	0.674	1263	0.397	1145	1416	0.274	0	0.945	0	0.503	1472	0	0.628	1708	0.916	0.548	0	0	0	As548_TRINITY_DN1252_c1_g2	0	NA	NA	NA	3047	2454	3198	NA	NA	NA	NA	NA	NA	NA	NA	NA	NA
TRINITY_DN11036_c0_g1_i6	1331	2	NA	NA	NA	TRINITY_DN11036_c0_g1	1783	NA	NA	NA	NA	0	0	0.614	0	0	0.951	0	0	1.61	0.575	0	1386	0	0.606	0.691	0.01	0	1039	0.774	0.482	As548_TRINITY_DN5126_c0_g1	0	NA	NA	NA	1818	1135	5497	NA	NA	NA	NA	NA	NA	NA	NA	NA	NA
TRINITY_DN11105_c0_g1_i2	1784	2	NA	NA	NA	TRINITY_DN11105_c0_g1	2753	NA	NA	NA	NA	0	0.301	0.046	0	0.132	0	1547	0.018	0.54	0	0	0	0.381	0	0.595	0	0.225	1131	0.312	0	As548_TRINITY_DN2134_c2_g4	0	NA	NA	NA	3047	3914	2071	NA	NA	NA	NA	NA	NA	NA	NA	NA	NA
TRINITY_DN1111_c1_g1_i18	2245	2	NA	NA	NA	TRINITY_DN1111_c1_g1	2734	NA	NA	NA	jcf7180001900303	0	0.506	0.463	0	4764	0.858	0	2512	0.81	0.629	1769	1109	0	0.954	0.499	0.062	1.37	0.611	0.183	2.87	As548_TRINITY_DN6670_c0_g1	0	NA	NA	NA	4795	2437	1388	chr6B	500209448	100	582	0	1075	chr6B	678347821	97679	474
TRINITY_DN11134_c0_g1_i4	2114	2	NA	NA	NA	TRINITY_DN11134_c0_g1	2298	NA	NA	NA	jcf7180001936625	0.718	0.145	1.32	0.566	1379	0.672	0	0.575	0.945	0.184	0.889	0.96	0.978	1257	1276	0.219	1285	0.866	0.806	0	As548_TRINITY_DN34594_c0_g1	0	NA	NA	NA	2467	2.05	5986	chr6B	528618706	98818	423	0	754	chr6B	528621093	98235	340
TRINITY_DN11140_c0_g1_i14	3607	2	NA	NA	NA	TRINITY_DN11140_c0_g1	4364	NBSLRR	1588	4028	NA	0.027	0.674	0.788	0	0.253	0.703	0	0.557	0.737	0.369	0.476	0.715	0.704	0	1046	0.718	1131	0	0	0.292	As548_TRINITY_DN2117_c0_g1	0	NBSLRR	1447	3873	1978	1073	2606	NA	NA	NA	NA	NA	NA	NA	NA	NA	NA
TRINITY_DN11160_c0_g1_i16	4663	2	NA	NA	NA	TRINITY_DN11160_c0_g1	7705	NA	NA	NA	jcf7180001890451	0.366	1265	0.301	1047	0.841	0.052	2037	0.858	0	1258	0.997	0.107	3578	1711	0.067	5171	1278	0	2053	0.988	As548_TRINITY_DN87369_c0_g1	0	NA	NA	NA	0	0	0.933	chr6B	567851279	87.5	552	1.15e-178	634	chr6B	5769482	84783	552
TRINITY_DN11160_c0_g1_i3	4001	2	NA	NA	NA	TRINITY_DN11160_c0_g1	7705	NA	NA	NA	jcf7180001890451	0	0	0.139	0.638	0	0	0	0.31	0	2245	0.727	0	2825	1885	0	1769	0.239	0	0.226	1.7	As548_TRINITY_DN87369_c0_g1	0	NA	NA	NA	0	0	0.933	chr6B	567851279	87.5	552	1.15e-178	634	chr6B	5769482	84783	552
TRINITY_DN11167_c0_g1_i2	260	2	NA	NA	NA	TRINITY_DN11167_c0_g1	302	NA	NA	NA	NA	0	13657	0	0	31192	2542	0	36428	8267	21469	18.55	14077	7859	33511	9644	1009	14771	67897	0	28206	As548_TRINITY_DN294_c0_g1	3.07e-110	NA	NA	NA	16842	35775	11938	NA	NA	NA	NA	NA	NA	NA	NA	NA	NA
TRINITY_DN11212_c0_g1_i5	2282	2	NA	NA	NA	TRINITY_DN11212_c0_g1	3412	NA	NA	NA	NA	0.244	0.325	0.73	1167	3274	0.827	0.627	3617	0.135	0.564	4408	0.299	0.987	2665	0.47	0.541	1.04	0	1021	3083	As548_TRINITY_DN33920_c0_g1	0	NA	NA	NA	0.36	0.537	1411	NA	NA	NA	NA	NA	NA	NA	NA	NA	NA
TRINITY_DN11261_c0_g1_i1	2067	2	NA	NA	NA	TRINITY_DN11261_c0_g1	2240	NA	NA	NA	NA	0.759	0.662	1.1	0	0.487	0.868	0	0.654	2316	0	0.287	2026	0.547	1878	1286	0	1082	0.265	0	0.806	As548_TRINITY_DN10178_c0_g1	0	NA	NA	NA	1179	2718	4495	NA	NA	NA	NA	NA	NA	NA	NA	NA	NA
TRINITY_DN11281_c0_g1_i1	2334	2	NA	NA	NA	TRINITY_DN11281_c0_g1	3003	NA	NA	NA	jcf7180001926778	0	0.698	0	0	0	0	0	0	0.156	0	0	0	0	0	0	0	0	0	0	0	As548_TRINITY_DN6276_c0_g1	0	NA	NA	NA	4875	2613	1809	chr6B	177728700	98705	386	0	684	chr6B	177720311	98093	367
TRINITY_DN11330_c0_g1_i1	367	2	NA	NA	NA	TRINITY_DN11330_c0_g1	578	NA	NA	NA	NA	0	1277	1471	0	1156	1044	0	0.495	6439	0	3089	2954	2219	3006	2246	0	4025	1.64	1773	0	As548_TRINITY_DN4558_c0_g1	8e-99	NA	NA	NA	4136	5375	4518	NA	NA	NA	NA	NA	NA	NA	NA	NA	NA
TRINITY_DN11334_c0_g1_i2	1628	2	NA	NA	NA	TRINITY_DN11334_c0_g1	2086	NA	NA	NA	NA	0.312	0.446	0.081	0	0.335	0.331	0.245	1079	0.343	0.466	0.521	0.651	0.841	0.56	0.221	0.146	0.485	0	0	0	As548_TRINITY_DN4991_c0_g1	1.34e-116	NA	NA	NA	12847	7785	9935	NA	NA	NA	NA	NA	NA	NA	NA	NA	NA
TRINITY_DN11364_c0_g1_i4	3345	2	NA	NA	NA	TRINITY_DN11364_c0_g1	3379	NA	NA	NA	NA	1301	0.807	1436	0.818	1409	1158	1635	2158	0.478	0	1921	1269	1857	3574	1.91	2.56	2838	2.14	0.43	1621	As548_TRINITY_DN8714_c1_g1	0	NA	NA	NA	6743	4671	4666	NA	NA	NA	NA	NA	NA	NA	NA	NA	NA
TRINITY_DN11367_c0_g1_i3	1136	2	NA	NA	NA	TRINITY_DN11367_c0_g1	1398	NA	NA	NA	NA	0.257	0.434	0.683	0	0.193	0.537	0	0	0.841	0	0.278	0.32	0.86	0	0.509	0.156	0.499	1814	0.441	0.443	As548_TRINITY_DN919_c0_g1	0	NA	NA	NA	14994	10125	1673	NA	NA	NA	NA	NA	NA	NA	NA	NA	NA
TRINITY_DN1137_c0_g1_i7	2881	2	NA	NA	NA	TRINITY_DN1137_c0_g1	4496	NA	NA	NA	NA	0.705	1144	0.602	1216	0.72	0.661	0.783	0.769	0.623	1214	0.314	1.44	1486	0.644	1305	1155	0.752	0.907	0.247	1589	As548_TRINITY_DN3754_c0_g2	0	NA	NA	NA	1888	2727	2356	NA	NA	NA	NA	NA	NA	NA	NA	NA	NA
TRINITY_DN11396_c0_g1_i35	838	2	NA	NA	NA	TRINITY_DN11396_c0_g1	3284	NA	NA	NA	NA	0	2168	0.741	0	1541	0	0	1618	1194	0.77	0.359	0.245	0	1552	0.451	0.198	0.695	0	0	0	As548_TRINITY_DN5738_c0_g1	4.32e-158	NA	NA	NA	1059	17.47	2413	NA	NA	NA	NA	NA	NA	NA	NA	NA	NA
TRINITY_DN11422_c0_g1_i7	1855	2	NA	NA	NA	TRINITY_DN11422_c0_g1	2164	NA	NA	NA	NA	0	0.096	1066	0	0	0.393	0	0	0	0	0	0.629	0.274	0	0	1436	0	0	0.494	0.893	As548_TRINITY_DN2502_c0_g1	0	NA	NA	NA	1858	2278	3528	NA	NA	NA	NA	NA	NA	NA	NA	NA	NA
TRINITY_DN11432_c0_g2_i1	1158	2	NA	NA	NA	TRINITY_DN11432_c0_g2	1158	NA	NA	NA	NA	0.461	0.626	0.776	0.794	0.628	1282	0.362	1017	0.467	0.282	0	0.651	0.371	1575	1017	1103	2177	0	0	0.522	As548_TRINITY_DN27869_c0_g2	1.19e-139	NA	NA	NA	0	0.748	0.205	NA	NA	NA	NA	NA	NA	NA	NA	NA	NA
TRINITY_DN11432_c2_g3_i3	1025	2	NA	NA	NA	TRINITY_DN11432_c2_g3	2249	NA	NA	NA	NA	0.108	0.434	0.417	0	0.456	1468	0.519	0	0.26	0	0	0.181	0	0	0.413	0	0.794	0.764	0	0	As548_TRINITY_DN27785_c0_g1	0	NA	NA	NA	1089	0.176	1366	chr6B	481269884	95082	61	1.93e-17	97.1	NA	NA	NA	NA
TRINITY_DN11443_c0_g1_i3	1581	2	NA	NA	NA	TRINITY_DN11443_c0_g1	1968	NA	NA	NA	NA	0.244	0.385	0.614	0	0.061	0.496	0	0.203	0.789	0.661	0.198	0.469	0.283	0.227	0.672	0.52	0.323	0	0.172	0.269	As548_TRINITY_DN41438_c0_g1	0	NA	NA	NA	0.839	0.8	1161	NA	NA	NA	NA	NA	NA	NA	NA	NA	NA
TRINITY_DN11447_c0_g1_i5	2075	2	NA	NA	NA	TRINITY_DN11447_c0_g1	3809	NA	NA	NA	NA	0	0.277	0.498	0.012	0.294	0.672	0.588	0	0.644	0	0.18	0.661	0.469	0.469	0.317	0.51	0.26	0	0.559	0	As548_TRINITY_DN5677_c0_g1	0	NA	NA	NA	1419	3008	3437	NA	NA	NA	NA	NA	NA	NA	NA	NA	NA
TRINITY_DN11463_c0_g1_i1	2151	2	NA	NA	NA	TRINITY_DN11463_c0_g1	2306	NA	NA	NA	NA	0.068	0	0.301	1324	0	0	0.813	0	0	0	0	0	0	0	0.048	0	0	0	0.828	0	As548_TRINITY_DN2037_c0_g1	0	NA	NA	NA	2417	1231	3266	NA	NA	NA	NA	NA	NA	NA	NA	NA	NA
TRINITY_DN11472_c2_g1_i2	1465	2	NA	NA	NA	TRINITY_DN11472_c2_g1	1590	NA	NA	NA	jcf7180001892604	0	0.915	0.915	0.469	0	1261	0	0.318	1018	1.16	1015	1077	0.948	1272	1286	1842	1089	0.448	0.419	0.577	As548_TRINITY_DN2218_c0_g1	6.64e-59	NA	NA	NA	57.12	44677	11448	chr6B	643866913	90059	845	0	1062	chr6B	643864814	86755	302
TRINITY_DN11513_c0_g1_i1	3071	2	NA	NA	NA	TRINITY_DN11513_c0_g1	4142	NA	NA	NA	jcf7180001586402	0.217	0.434	0.162	0	0.081	0.258	0	0.46	0.135	0	0.189	0.405	0.313	0.356	0.192	0	0.4	0	0.043	0.19	As548_TRINITY_DN6921_c0_g1	0	NA	NA	NA	2088	6113	2048	NA	NA	NA	NA	NA	NA	NA	NA	NA	NA
TRINITY_DN11569_c0_g1_i4	3443	2	NA	NA	NA	TRINITY_DN11569_c0_g1	3516	NA	NA	NA	NA	0	0.337	1587	0.421	0	0.889	0.725	0.239	1454	0.716	0.503	1.29	0.215	0.363	1593	0.208	0.52	0	0.376	0	As548_TRINITY_DN9069_c0_g1	0	NA	NA	NA	2517	1513	4324	NA	NA	NA	NA	NA	NA	NA	NA	NA	NA
TRINITY_DN11576_c0_g1_i13	361	2	NA	NA	NA	TRINITY_DN11576_c0_g1	2275	NA	NA	NA	jcf7180001926772	0	7202	6174	13275	28343	5829	0	3193	5079	5129	7515	8031	3998	0	8685	1613	2205	13714	1365	5613	As548_TRINITY_DN6119_c0_g3	3e-153	NA	NA	NA	14755	26292	19221	chr6S	653141825	86064	409	1e-129	470	chr6S	653142118	97.07	273
TRINITY_DN11581_c0_g1_i7	6090	2	NA	NA	NA	TRINITY_DN11581_c0_g1	6358	NA	NA	NA	jcf7180001930505	0	0	0.625	0	0	0.475	0	0	0.218	0.705	0.072	0.64	0.254	0.969	1017	0.25	0.857	0.948	0	0	As548_TRINITY_DN180_c0_g1	0	NA	NA	NA	2757	2577	4416	chr6B	708944048	97929	2269	0	3930	chr6B	708945632	99005	1005
TRINITY_DN1158_c0_g1_i4	2281	2	NA	NA	NA	TRINITY_DN1158_c0_g1	3834	NA	NA	NA	NA	0.989	2914	1066	0.614	0	2759	0	1512	2.41	0.705	1598	2261	0.987	0	2668	1009	1061	0.173	1.29	2.87	As548_TRINITY_DN33_c0_g1	0	NA	NA	NA	6933	7415	5485	NA	NA	NA	NA	NA	NA	NA	NA	NA	NA
TRINITY_DN11609_c0_g1_i4	548	2	NA	NA	NA	TRINITY_DN11609_c0_g1	989	NA	NA	NA	NA	7994	8575	10842	8.81	14678	11368	9655	46067	35187	3307	35052	17704	5865	17649	13233	5.64	17728	8691	16046	35479	As548_TRINITY_DN2909_c0_g2	5.22e-68	NA	NA	NA	3826	10995	2.97	NA	NA	NA	NA	NA	NA	NA	NA	NA	NA
TRINITY_DN11635_c0_g2_i1	2896	2	NA	NA	NA	TRINITY_DN11635_c0_g2	2896	NBSLRR	29	1771	jcf7180001932433	0.406	1337	0.857	0.686	0.588	0.341	0.47	0.557	0.343	1.16	1347	0.725	1965	1189	0.96	2.3	1398	0.275	0.398	0.166	As548_TRINITY_DN19246_c0_g1	0	NBSLRR	196	2283	2318	1056	2037	chr6B	12957378	82186	2077	0	1755	NA	NA	NA	NA
TRINITY_DN11649_c0_g1_i6	2564	2	NA	NA	NA	TRINITY_DN11649_c0_g1	3621	NA	NA	NA	jcf7180001891763	0.257	0.217	0.834	0	0.314	0.961	0.803	0.23	1049	0.586	0.287	1098	1046	0.341	1.2	0.832	0.232	1039	0.505	0.538	As548_TRINITY_DN2481_c0_g1	0	NA	NA	NA	2038	1144	2652	chr6S	54544156	98994	895	0	1602	chr6S	52608714	92961	895
TRINITY_DN11672_c0_g1_i5	1505	2	NA	NA	NA	TRINITY_DN11672_c0_g1	2913	NA	NA	NA	jcf7180001909474	0.352	0.193	0.938	0	0	0.806	0	0.38	0.55	0.119	0	1066	0.42	0.038	1391	0.333	0.232	0.122	0.236	0	As548_TRINITY_DN16921_c0_g1	6.77e-116	NA	NA	NA	0.929	1786	3.71	chr6B	179988789	92655	354	9.86e-136	490	chr6B	179990279	98378	185
TRINITY_DN116_c0_g1_i18	3250	2	NA	NA	NA	TRINITY_DN116_c0_g1	5521	NA	NA	NA	jcf7180001637604	0	1.06	0.672	0	0.608	0.723	0	0	0.955	0.9	1042	1.29	0.674	0.681	0.566	0.801	1419	2099	0	1115	As548_TRINITY_DN3433_c0_g1	0	NA	NA	NA	6024	6061	3938	NA	NA	NA	NA	NA	NA	NA	NA	NA	NA
TRINITY_DN11700_c0_g2_i1	577	2	NA	NA	NA	TRINITY_DN11700_c0_g2	577	NA	NA	NA	jcf7180001763528	0.366	0.795	0.927	1288	0.426	0.827	0	0	1485	0	0	1504	0.557	0	1123	0.343	0.365	0	0.355	0	As548_TRINITY_DN2305_c0_g1	1.91e-25	NA	NA	NA	2507	2252	3.96	NA	NA	NA	NA	NA	NA	NA	NA	NA	NA
TRINITY_DN11703_c0_g1_i3	2781	2	NA	NA	NA	TRINITY_DN11703_c0_g1	5027	NA	NA	NA	NA	0.718	0.735	0.846	1456	0.497	0.951	0	0.761	0.769	0	0.377	1002	0.802	0.81	0.844	0.499	1011	1793	0.537	1597	As548_TRINITY_DN550_c0_g2	0	NA	NA	NA	1828	3316	6.1	NA	NA	NA	NA	NA	NA	NA	NA	NA	NA
TRINITY_DN11709_c2_g1_i1	442	2	NA	NA	NA	TRINITY_DN11709_c2_g1	529	NA	NA	NA	jcf7180001933004	1003	2071	1703	1637	1419	0.351	5043	0	0.997	1106	0	2165	3412	0.795	0.086	3246	1047	0	2741	0.917	As548_TRINITY_DN15547_c0_g1	6.01e-55	NA	NA	NA	6044	2366	0.159	chr6B	391236310	100	235	8.13e-120	435	chr6B	391239961	90361	166
TRINITY_DN11713_c1_g1_i1	1158	2	NA	NA	NA	TRINITY_DN11713_c1_g1	1418	NA	NA	NA	NA	0	0.855	0.568	0.602	1379	0.424	0	0.964	0.301	0	1104	0.992	0.44	0.159	0.432	1103	0.365	0.897	0.29	0.648	As548_TRINITY_DN86471_c0_g1	0	NA	NA	NA	0	1319	1.24	NA	NA	NA	NA	NA	NA	NA	NA	NA	NA
TRINITY_DN11720_c0_g1_i10	1736	2	NA	NA	NA	TRINITY_DN11720_c0_g1	2720	NA	NA	NA	jcf7180001719503	0	0	0.185	0	0	0	0	0.08	0	0	0	0.075	0	0.31	0	0	0	0	0	0	As548_TRINITY_DN2571_c0_g2	0	NA	NA	NA	2797	7714	3289	NA	NA	NA	NA	NA	NA	NA	NA	NA	NA
TRINITY_DN11740_c0_g1_i4	471	2	NA	NA	NA	TRINITY_DN11740_c0_g1	592	NA	NA	NA	jcf7180001523459	1098	3456	0.95	1.48	1298	0.775	0	0	1984	0	0	0.853	2023	1.59	0.154	1883	2283	0	1225	0	As548_TRINITY_DN8462_c0_g1	1.87e-60	NA	NA	NA	0.36	0.396	0.33	chr6B	598015944	89621	501	1.83e-171	606	NA	NA	NA	NA
TRINITY_DN11773_c0_g1_i3	3322	2	NBSLRR	515	2976	TRINITY_DN11773_c0_g1	3451	NBSLRR	549	3105	NA	0.488	0.855	0.788	0	0.527	0.837	0.401	0.389	1049	0	0.386	0.736	1095	0.636	0.94	0.437	0.773	0.937	0.064	0	As548_TRINITY_DN10108_c0_g1	0	NBSLRR	183	1791	0.31	0.334	0.99	NA	NA	NA	NA	NA	NA	NA	NA	NA	NA
TRINITY_DN11780_c0_g1_i16	2087	2	NA	NA	NA	TRINITY_DN11780_c0_g1	3718	NA	NA	NA	NA	0.054	0.711	0.035	0.903	0	0.062	0	0	0.28	0	0	0.096	1046	0.401	0.182	0.51	0.323	0	0	0	As548_TRINITY_DN12247_c0_g1	0	NA	NA	NA	3516	4011	1343	NA	NA	NA	NA	NA	NA	NA	NA	NA	NA
TRINITY_DN11780_c0_g1_i21	694	2	NA	NA	NA	TRINITY_DN11780_c0_g1	3718	NA	NA	NA	NA	0	1	0.44	0	0.922	0.145	0	0.761	1163	1236	0.512	0	1124	0.712	0.288	1353	1096	0	0	0	As548_TRINITY_DN12247_c0_g1	0	NA	NA	NA	3516	4011	1343	NA	NA	NA	NA	NA	NA	NA	NA	NA	NA
TRINITY_DN11783_c0_g2_i1	2740	2	NA	NA	NA	TRINITY_DN11783_c0_g2	3989	NA	NA	NA	jcf7180001895373	0.203	0.566	0.255	0.409	0.365	0.269	0.441	0.239	0.125	0.325	0.341	0.309	0.645	0.363	0.202	0.499	0.478	0.285	0.032	0	As548_TRINITY_DN57315_c0_g1	0	NA	NA	NA	0.539	0	1115	chr6B	249501386	92193	269	3.96e-101	375	chr6B	249501689	94.18	189
TRINITY_DN117_c4_g1_i4	378	2	NA	NA	NA	TRINITY_DN117_c4_g1	588	NA	NA	NA	jcf7180001526978	0	1975	4703	0	5.21	2842	0	1.53	2617	19019	6007	5098	3519	4914	5815	7991	9875	0	0	0	As548_TRINITY_DN4259_c0_g1	2.23e-109	NA	NA	NA	5584	6.21	6544	chr6S	25054164	98246	171	1.24e-78	298	chr6S	25054240	88652	141
TRINITY_DN11813_c0_g1_i4	363	2	NA	NA	NA	TRINITY_DN11813_c0_g1	501	NA	NA	NA	NA	0	3974	1216	5669	1865	0	0	0	0.706	0	0	2666	0	1878	2015	0.635	0.723	0	0	0	As548_TRINITY_DN33818_c0_g1	4.42e-51	NA	NA	NA	0.879	0	0.068	NA	NA	NA	NA	NA	NA	NA	NA	NA	NA
TRINITY_DN11838_c0_g1_i3	3205	2	NA	NA	NA	TRINITY_DN11838_c0_g1	3837	NA	NA	NA	NA	0.312	1.12	1089	1071	2473	1033	0	0.31	1277	0	0.404	1109	1398	1817	1036	1186	1861	0.224	0.204	0.656	As548_TRINITY_DN19762_c0_g1	0	NA	NA	NA	0.969	1.1	1821	NA	NA	NA	NA	NA	NA	NA	NA	NA	NA
TRINITY_DN11867_c0_g1_i4	3709	2	NBSLRR	2774	3643	TRINITY_DN11867_c0_g1	5655	NBSLRR	3330	5089	jcf7180001939569	0.149	0.277	0.336	0	0.912	0.475	0	0.15	0.364	0	0.305	0.469	0.391	0.977	0.336	0.708	0.4	0	0.398	0	As548_TRINITY_DN470_c2_g1	0	NBSLRR	781	2115	6483	7714	4837	chr6B	699060715	86399	1147	0	1249	chr6B	699073617	84651	215
TRINITY_DN11867_c0_g1_i5	4599	2	NBSLRR	2774	4132	TRINITY_DN11867_c0_g1	5655	NBSLRR	3330	5089	jcf7180001939569	0	1	0.081	0	0	0	0	0	0.01	0.466	0.736	0	0.127	0.288	0	0	0.562	0.295	0	1012	As548_TRINITY_DN470_c2_g1	0	NBSLRR	781	2115	6483	7714	4837	chr6B	699060715	86399	1147	0	1249	chr6B	699073617	84651	215
TRINITY_DN11890_c0_g1_i10	3716	2	NA	NA	NA	TRINITY_DN11890_c0_g1	4228	NA	NA	NA	NA	0	0.301	0.637	0.12	0.152	1116	0	0.442	0.322	0	0.682	0.672	0.479	0.803	1487	0.187	0.393	0.194	0	0.3	As548_TRINITY_DN1061_c0_g1	0	NA	NA	NA	0.669	1.39	2367	NA	NA	NA	NA	NA	NA	NA	NA	NA	NA
TRINITY_DN1191_c0_g1_i3	4427	2	NA	NA	NA	TRINITY_DN1191_c0_g1	5120	NA	NA	NA	jcf7180001889560	0.542	0.229	3753	0.578	0.355	3.09	0	0.345	3396	0	0	4.82	2102	0.432	4184	0.988	0.667	2089	0.57	0.292	As548_TRINITY_DN75003_c0_g1	0	NA	NA	NA	5344	6659	21053	chr6S	58663674	97361	341	1e-162	580	chr6S	58453834	96774	341
TRINITY_DN11928_c0_g1_i9	1059	2	NA	NA	NA	TRINITY_DN11928_c0_g1	2485	NA	NA	NA	NA	0	0.482	0.127	0	0	0.083	0	0.389	0	0	0	0	0.743	0.591	0.365	0.416	0.759	0	0	0	As548_TRINITY_DN3870_c0_g2	6.11e-76	NA	NA	NA	4585	3.29	7465	NA	NA	NA	NA	NA	NA	NA	NA	NA	NA
TRINITY_DN11946_c0_g2_i5	6653	2	NA	NA	NA	TRINITY_DN11946_c0_g2	6888	NA	NA	NA	jcf7180001942055	0.65	1361	0.822	0.566	1348	0.971	0.94	0.725	1672	0.759	0.422	1578	0.743	0.568	1756	0.968	0.871	0.785	0.43	0.632	As548_TRINITY_DN10339_c0_g1	0	NA	NA	NA	2328	2313	4188	chr6B	693888105	83948	461	2.41e-115	424	chr6B	244562531	92437	238
TRINITY_DN11984_c0_g1_i3	2225	2	NA	NA	NA	TRINITY_DN11984_c0_g1	2623	NA	NA	NA	NA	0.312	2059	0.127	0	1399	0.145	0	0.982	0.135	0.51	2227	0.192	0.293	2938	0.259	0.219	1166	0.122	0	0.664	As548_TRINITY_DN7047_c0_g1	0	NA	NA	NA	2697	5911	1184	NA	NA	NA	NA	NA	NA	NA	NA	NA	NA
TRINITY_DN12003_c0_g1_i9	2672	2	NA	NA	NA	TRINITY_DN12003_c0_g1	4109	NA	NA	NA	NA	0.352	0	0.521	0	0	0.568	0	0	0.062	0.434	0	0.843	0.635	0	1152	0.437	0	0.377	0	0	As548_TRINITY_DN1088_c2_g1	0	NA	NA	NA	1608	0.405	4051	NA	NA	NA	NA	NA	NA	NA	NA	NA	NA
TRINITY_DN12024_c0_g1_i6	6017	2	NA	NA	NA	TRINITY_DN12024_c0_g1	6056	NA	NA	NA	NA	0.623	1963	1737	0	0	1054	0.685	0.088	2399	0	0.907	2069	1965	1325	1804	2112	1538	0.438	0.14	0.688	As548_TRINITY_DN943_c0_g1	0	NA	NA	NA	7003	5.04	6236	NA	NA	NA	NA	NA	NA	NA	NA	NA	NA
TRINITY_DN12061_c0_g1_i8	3158	2	NA	NA	NA	TRINITY_DN12061_c0_g1	3387	NA	NA	NA	NA	0.203	1.77	1297	0.867	0.933	1168	0.078	0.513	1693	1811	1158	2368	3646	0.371	1391	2112	1398	2007	0.15	0	As548_TRINITY_DN3095_c0_g1	0	NA	NA	NA	4156	4363	5144	NA	NA	NA	NA	NA	NA	NA	NA	NA	NA
TRINITY_DN12074_c0_g1_i1	1478	2	NA	NA	NA	TRINITY_DN12074_c0_g1	1706	NA	NA	NA	NA	71027	6.78	122061	71972	13472	80261	77792	8313	195.7	96688	15488	189353	111369	11069	147974	57769	1405	154989	57.5	3.17	As548_TRINITY_DN11464_c0_g1	0	NA	NA	NA	90465	24.41	211877	NA	NA	NA	NA	NA	NA	NA	NA	NA	NA
TRINITY_DN12086_c0_g1_i8	1077	2	NA	NA	NA	TRINITY_DN12086_c0_g1	1558	NA	NA	NA	NA	0	0.482	1019	0	1054	0.672	0	0	0	0	0	1045	0	0.583	0.864	0	0.913	3332	1043	1383	As548_TRINITY_DN2717_c0_g1	7.26e-163	NA	NA	NA	1059	8189	4871	NA	NA	NA	NA	NA	NA	NA	NA	NA	NA
TRINITY_DN12087_c0_g1_i4	1792	2	NA	NA	NA	TRINITY_DN12087_c0_g1	2749	NA	NA	NA	jcf7180001939060	0.379	0	0.811	0	0.112	0.703	0	0.212	0.405	0	0	0.48	0.098	0.295	0.451	0.177	0.133	0	0.15	0	As548_TRINITY_DN1050_c0_g1	0	NA	NA	NA	3656	5.99	7.67	chr6S	178685181	91489	141	8.16e-47	195	NA	NA	NA	NA
TRINITY_DN1209_c0_g1_i11	4125	2	NBSLRR	1232	3768	TRINITY_DN1209_c0_g1	7366	NBSLRR	3029	5565	jcf7180001672048	1396	2312	0.764	0	1551	2522	0	1.15	0.613	1529	2361	1578	3715	3013	1.67	2539	2606	0.764	0.226	1368	As548_TRINITY_DN24699_c0_g2	0	NA	NA	NA	3676	5155	4859	chr6S	6808775	96243	346	1.13e-158	568	chr6S	6809210	98684	304
TRINITY_DN12111_c0_g1_i3	1780	2	NA	NA	NA	TRINITY_DN12111_c0_g1	2294	NA	NA	NA	jcf7180001523288	0	0	1309	0	0.314	1344	1195	0	1994	0	0	1493	0.44	0	1958	0	0	0.968	0	0	As548_TRINITY_DN3642_c0_g1	0	NA	NA	NA	2877	3712	6396	NA	NA	NA	NA	NA	NA	NA	NA	NA	NA
TRINITY_DN12143_c0_g1_i4	1194	2	NA	NA	NA	TRINITY_DN12143_c0_g1	1362	NA	NA	NA	NA	0.61	0.807	0.579	0.566	0.426	0	0	0.876	0.706	0.466	0	1.45	0.088	0	0.403	1425	0	0.082	1043	1945	As548_TRINITY_DN2818_c0_g1	0	NA	NA	NA	8131	1135	5576	NA	NA	NA	NA	NA	NA	NA	NA	NA	NA
TRINITY_DN1214_c0_g1_i29	1480	2	NA	NA	NA	TRINITY_DN1214_c0_g1	5501	NA	NA	NA	jcf7180001929593	0.84	0.915	0.301	0	0	0	0	0.398	0	0	0	0	1202	0	0.672	0.614	0	0	0	0	As548_TRINITY_DN500_c1_g1	0	NA	NA	NA	0	0	0.444	chr6S	756173846	97.5	160	7.38e-70	272	chr6S	756179801	97.5	160
TRINITY_DN1214_c0_g1_i50	1561	2	NA	NA	NA	TRINITY_DN1214_c0_g1	5501	NA	NA	NA	jcf7180001929593	0.691	1951	0.591	0	1004	1788	0	0.858	0.945	0	0.512	0.565	1877	1423	0.566	1072	2.03	1029	0	2174	As548_TRINITY_DN500_c1_g1	0	NA	NA	NA	0	0	0.444	chr6S	756173846	97.5	160	7.38e-70	272	chr6S	756179801	97.5	160
TRINITY_DN12151_c0_g1_i20	3347	2	NA	NA	NA	TRINITY_DN12151_c0_g1	4479	NA	NA	NA	NA	0	0.542	0	0	0.193	0	0	0	0	0	0	0.192	0.244	0.068	0	0	0	0	0	0	As548_TRINITY_DN2479_c0_g1	0	NA	NA	NA	2128	6105	11278	NA	NA	NA	NA	NA	NA	NA	NA	NA	NA
TRINITY_DN12173_c0_g2_i2	2211	2	NA	NA	NA	TRINITY_DN12173_c0_g2	2615	NA	NA	NA	jcf7180001901011	0.42	0.674	0.359	0	0.01	0.093	0	0.301	0.509	0.249	0.215	0.267	0.293	0.515	0.355	0.385	0.52	0	0.129	0.522	As548_TRINITY_DN1930_c0_g1	7.91e-110	NA	NA	NA	5284	1.83	4928	chr6S	179911964	97483	874	0	1493	chr6S	179911392	96119	773
TRINITY_DN12264_c0_g1_i8	2035	2	NA	NA	NA	TRINITY_DN12264_c0_g1	3510	NA	NA	NA	NA	0.203	0	1031	0	0.416	1302	0	0.478	0.28	0	0.997	1.44	0.958	0.341	0.969	0	0.597	1416	0.957	0	As548_TRINITY_DN18243_c0_g1	0	NA	NA	NA	0.599	1777	1502	NA	NA	NA	NA	NA	NA	NA	NA	NA	NA
TRINITY_DN12314_c0_g2_i2	2110	2	NA	NA	NA	TRINITY_DN12314_c0_g2	2784	NA	NA	NA	jcf7180001716146	0.135	0.783	0.452	0.132	0	0.651	0.588	0.142	0.727	0.206	0.108	0.555	0.283	0.144	0.432	0.177	0.478	0	0	0.34	As548_TRINITY_DN65037_c0_g1	2.33e-115	NA	NA	NA	0	16.08	0	chr6S	463678059	96943	229	1.64e-103	383	NA	NA	NA	NA
TRINITY_DN12328_c0_g1_i3	4617	2	NA	NA	NA	TRINITY_DN12328_c0_g1	5599	NA	NA	NA	NA	0.827	1289	0.764	1192	1206	1292	0	1008	1205	0	0.817	1418	0.635	1151	1.67	1197	1271	0.958	0.215	1415	As548_TRINITY_DN6721_c0_g1	0	NA	NA	NA	3406	3686	3835	chr6S	180712216	85526	304	2.06e-80	307	NA	NA	NA	NA
TRINITY_DN12389_c0_g1_i15	3263	2	NA	NA	NA	TRINITY_DN12389_c0_g1	4736	NA	NA	NA	NA	2236	3396	1587	0	2423	2945	0.823	3246	2347	2505	3995	1898	3763	4603	1775	1831	4839	0.846	0.484	0.83	As548_TRINITY_DN2892_c0_g1	0	NA	NA	NA	7232	6333	3255	NA	NA	NA	NA	NA	NA	NA	NA	NA	NA
TRINITY_DN1241_c1_g1_i3	2107	2	NA	NA	NA	TRINITY_DN1241_c1_g1	2945	NA	NA	NA	jcf7180001893077	0	1.65	0.197	0	0	0.176	0	0.787	0.405	0.195	0.305	0.171	0.635	1651	0.23	0.52	1672	0	1032	0	As548_TRINITY_DN4900_c0_g1	0	NA	NA	NA	3856	10389	2.8	chr6S	83777623	81387	274	8.69e-52	211	chr6S	83797865	85714	168
TRINITY_DN1242_c0_g2_i3	2467	2	NA	NA	NA	TRINITY_DN1242_c0_g2	2892	NA	NA	NA	NA	0	0.915	0.405	0	0	0.403	0.911	0.628	0.789	0.26	0	0.352	0.332	0.53	0.605	0.291	0.639	0	0	0	As548_TRINITY_DN7239_c0_g1	0	NA	NA	NA	3446	0.985	6.1	chr6B	99076119	92188	64	4.17e-15	89.8	chr6B	692606761	95	40
TRINITY_DN1242_c0_g2_i4	2475	2	NA	NA	NA	TRINITY_DN1242_c0_g2	2892	NA	NA	NA	NA	1138	0.783	1309	1167	1075	1199	0	1141	1101	0.249	0.88	1013	1046	0.833	1555	1748	1131	1049	0.677	1676	As548_TRINITY_DN7239_c0_g1	0	NA	NA	NA	3446	0.985	6.1	chr6B	99076119	92188	64	4.17e-15	89.8	chr6B	692606761	95	40
TRINITY_DN12504_c0_g1_i6	813	2	NA	NA	NA	TRINITY_DN12504_c0_g1	1264	NA	NA	NA	NA	0	0	0.985	0	0	1251	1488	0	0.488	2483	0.377	0.181	1144	0	0.096	0.156	0	0	0	0	As548_TRINITY_DN5520_c0_g1	1e-145	NA	NA	NA	5135	4301	12746	NA	NA	NA	NA	NA	NA	NA	NA	NA	NA
TRINITY_DN12521_c0_g1_i3	4703	2	NA	NA	NA	TRINITY_DN12521_c0_g1	4900	NA	NA	NA	jcf7180001551064	0.759	0.554	1263	0.325	0.061	0.723	0.499	0.053	1558	0.564	0.853	1664	0	1015	1468	0.406	0.442	1294	0.215	0.877	As548_TRINITY_DN7586_c0_g1	0	NA	NA	NA	1718	2173	1.9	NA	NA	NA	NA	NA	NA	NA	NA	NA	NA
TRINITY_DN12546_c0_g1_i7	1935	2	NA	NA	NA	TRINITY_DN12546_c0_g1	2448	NA	NA	NA	NA	0	0	0.347	0.433	0.02	0.083	0	0	0.467	0.098	0	0.096	0	0	0.077	0.447	0.197	0	0	0	As548_TRINITY_DN64431_c0_g1	0	NA	NA	NA	7242	6562	8444	NA	NA	NA	NA	NA	NA	NA	NA	NA	NA
TRINITY_DN12586_c0_g1_i2	2451	2	NA	NA	NA	TRINITY_DN12586_c0_g1	2725	NA	NA	NA	NA	0	0.542	0.417	0	0.01	0.217	0	0	0.436	0	0.207	0.245	0.156	0.295	0.259	0	0.098	0.295	0	0	As548_TRINITY_DN8583_c0_g1	0	NA	NA	NA	1109	0.976	1138	NA	NA	NA	NA	NA	NA	NA	NA	NA	NA
TRINITY_DN1258_c0_g1_i1	2389	2	NA	NA	NA	TRINITY_DN1258_c0_g1	3103	NA	NA	NA	jcf7180001609194	0.312	0	1529	2.01	1561	0.465	0	0.106	1454	0	2254	1536	0.86	0.167	1401	0.728	2128	1274	0	0.783	As548_TRINITY_DN7424_c1_g2	0	NA	NA	NA	4156	10072	16274	chr6S	285714601	93048	187	1.15e-70	274	chr6S	285710514	96581	117
TRINITY_DN1263_c0_g1_i13	4273	2	NA	NA	NA	TRINITY_DN1263_c0_g1	4660	NA	NA	NA	NA	0.339	0.65	2247	1228	0.933	1416	0	0.663	1579	1117	0.754	1952	1095	0.81	2341	1654	0.309	1457	0.656	0.656	As548_TRINITY_DN14011_c0_g1	0	NA	NA	NA	4805	4988	9582	NA	NA	NA	NA	NA	NA	NA	NA	NA	NA
TRINITY_DN1266_c0_g1_i3	2169	2	NA	NA	NA	TRINITY_DN1266_c0_g1	3090	NA	NA	NA	NA	0.976	2095	0.614	0	0	0.248	0	0.725	0	1312	0	0.501	0	1272	0.336	0.021	0.934	0	0	0	As548_TRINITY_DN44_c0_g4	0	NA	NA	NA	8181	11602	3403	NA	NA	NA	NA	NA	NA	NA	NA	NA	NA
TRINITY_DN1270_c0_g1_i14	2160	2	NA	NA	NA	TRINITY_DN1270_c0_g1	2890	NA	NA	NA	NA	0	2782	1981	0	0	2594	0	0.539	0.54	0.694	1176	1493	1.32	2658	2802	1425	1882	0	0	0.553	As548_TRINITY_DN2879_c0_g1	0	NA	NA	NA	431808	214078	169.44	chr6S	270390360	97143	35	3.27e-06	60.2	NA	NA	NA	NA
TRINITY_DN1270_c0_g1_i3	2037	2	NA	NA	NA	TRINITY_DN1270_c0_g1	2890	NA	NA	NA	NA	1802	2059	0.788	1998	3001	2904	0.901	1946	4456	3036	1481	3306	3353	2801	2927	2435	2831	3128	2848	1984	As548_TRINITY_DN2879_c0_g1	0	NA	NA	NA	431808	214078	169.44	chr6S	270390360	97143	35	3.27e-06	60.2	NA	NA	NA	NA
TRINITY_DN12724_c0_g1_i2	2272	2	NA	NA	NA	TRINITY_DN12724_c0_g1	2558	NA	NA	NA	NA	0.068	0.458	0.382	0.518	0.112	0	0	0	0.644	0.651	0.557	0.672	0.088	0.962	0.768	0	1068	0	0.054	0.972	As548_TRINITY_DN19544_c0_g3	0	NA	NA	NA	0.749	1935	0.831	NA	NA	NA	NA	NA	NA	NA	NA	NA	NA
TRINITY_DN12731_c0_g1_i1	2848	2	NA	NA	NA	TRINITY_DN12731_c0_g1	3727	NA	NA	NA	NA	0	0.409	0.892	0.144	0	0.899	0	0.035	0.654	0	0	0.768	0.44	0	1065	0.104	0	0	0	0	As548_TRINITY_DN36054_c0_g2	0	NA	NA	NA	1588	1319	3403	chr6S	309052021	93.22	59	6.97e-14	86.1	NA	NA	NA	NA
TRINITY_DN12731_c0_g1_i3	2557	2	NA	NA	NA	TRINITY_DN12731_c0_g1	3727	NA	NA	NA	NA	0.434	0	0.44	0	0	0.465	0	0	0.353	0	0	0.181	0.01	0.235	0.864	0.052	0	0.204	0	0	As548_TRINITY_DN36054_c0_g2	0	NA	NA	NA	1588	1319	3403	chr6S	309052021	93.22	59	6.97e-14	86.1	NA	NA	NA	NA
TRINITY_DN12731_c0_g1_i6	1983	2	NA	NA	NA	TRINITY_DN12731_c0_g1	3727	NA	NA	NA	NA	0.244	0.229	2131	0.229	0.172	1075	0	0.23	0.904	0.152	0.566	1066	0.87	0.318	1401	0.541	0.162	0.479	0.688	0	As548_TRINITY_DN36054_c0_g2	0	NA	NA	NA	1588	1319	3403	chr6S	309052021	93.22	59	6.97e-14	86.1	NA	NA	NA	NA
TRINITY_DN12739_c0_g1_i4	407	2	NA	NA	NA	TRINITY_DN12739_c0_g1	643	NA	NA	NA	NA	0	0.53	0.208	0	0	0	0	0.363	0.499	2548	0	0	3324	0.22	0.221	3069	0.4	0	0	0	As548_TRINITY_DN1814_c2_g1	1.22e-57	NA	NA	NA	116948	79449	15466	NA	NA	NA	NA	NA	NA	NA	NA	NA	NA
TRINITY_DN12742_c0_g2_i5	1778	2	NA	NA	NA	TRINITY_DN12742_c0_g2	1936	NA	NA	NA	NA	0.488	0.927	0	0	0.132	0	0.666	0	0	0	0.153	0	0.02	0.538	0	0	0	0	0	1107	As548_TRINITY_DN4200_c4_g2	1.39e-41	NA	NA	NA	1229	1.24	2071	chr6B	114334534	84774	486	1.83e-131	475	NA	NA	NA	NA
TRINITY_DN1274_c0_g1_i10	960	2	NA	NA	NA	TRINITY_DN1274_c0_g1	1887	NA	NA	NA	jcf7180001762205	0	0	2212	0	0.933	1478	0	0	0	0.607	0.584	0	2874	0	1689	0	0.878	1528	4245	0	As548_TRINITY_DN6102_c0_g1	8.87e-158	NA	NA	NA	21128	12438	48229	NA	NA	NA	NA	NA	NA	NA	NA	NA	NA
TRINITY_DN1280_c0_g1_i10	4431	2	NA	NA	NA	TRINITY_DN1280_c0_g1	4773	NA	NA	NA	NA	1274	2.3	0.255	0	3305	0.217	0	1875	0.239	0	1589	0.299	0.479	1734	0.173	0.291	3442	0	0	3755	As548_TRINITY_DN2359_c0_g1	0	NA	NA	NA	11947	64363	8182	NA	NA	NA	NA	NA	NA	NA	NA	NA	NA
TRINITY_DN12821_c0_g1_i2	3260	2	NA	NA	NA	TRINITY_DN12821_c0_g1	4260	NA	NA	NA	NA	0	0.542	0.023	0	0	0.021	0	0	0.28	0	0.207	0.48	0.068	0.454	0.144	0	0.632	0.53	0	0.348	As548_TRINITY_DN12516_c0_g1	0	NA	NA	NA	2617	2841	3983	NA	NA	NA	NA	NA	NA	NA	NA	NA	NA
TRINITY_DN12824_c0_g1_i8	1040	2	NA	NA	NA	TRINITY_DN12824_c0_g1	1956	NA	NA	NA	NA	0	0.698	0.927	1143	0.558	0.703	0	0.486	0.312	0.293	0.593	0.747	1281	0	0.806	0.135	0.464	0.275	0	0	As548_TRINITY_DN10508_c0_g1	0	NA	NA	NA	8671	8031	6623	NA	NA	NA	NA	NA	NA	NA	NA	NA	NA
TRINITY_DN12883_c0_g2_i1	2334	2	NA	NA	NA	TRINITY_DN12883_c0_g2	2504	NA	NA	NA	jcf7180001942613	0.461	0.626	0	0	0.122	0.052	0	0.159	0	0.325	0	0.064	0.411	0.31	0.221	0.281	0	0.397	0	0	As548_TRINITY_DN2587_c0_g1	0	NA	NA	NA	5864	7231	5087	chr6S	83324552	99017	916	0	1642	chr6S	83322155	98588	779
TRINITY_DN12907_c0_g1_i1	2188	2	NA	NA	NA	TRINITY_DN12907_c0_g1	2933	NA	NA	NA	NA	0.772	1216	0.753	0	0.608	0.641	0	1.15	0.82	0.38	1059	0.491	0.626	1484	0.605	0.427	1.77	0.622	0	0.988	As548_TRINITY_DN17005_c0_g1	0	NA	NA	NA	8871	17777	5497	NA	NA	NA	NA	NA	NA	NA	NA	NA	NA
TRINITY_DN12912_c1_g1_i5	786	2	NA	NA	NA	TRINITY_DN12912_c1_g1	1153	NA	NA	NA	jcf7180001889590	1694	0.036	2432	0	0	0.723	0	0	0.218	0.314	0	1397	0	0	0	2091	0	3352	0.279	3526	As548_TRINITY_DN1163_c0_g3	4.56e-94	NA	NA	NA	5544	5401	8239	chr6S	799100330	85816	282	1.51e-70	272	chr6S	799100081	91346	208
TRINITY_DN12957_c0_g1_i2	1622	2	NA	NA	NA	TRINITY_DN12957_c0_g1	1731	NA	NA	NA	NA	0	0.325	2166	0	0.436	0.176	0	0.062	1257	0	0	0.384	0	0	1545	0	0	0.998	0	0	As548_TRINITY_DN807_c3_g1	0	NA	NA	NA	6144	13731	23.75	NA	NA	NA	NA	NA	NA	NA	NA	NA	NA
TRINITY_DN12960_c0_g1_i8	2248	2	NA	NA	NA	TRINITY_DN12960_c0_g1	3397	NA	NA	NA	jcf7180001702167	0.108	0.145	0.371	0	0.142	0.465	0.333	0.363	0.8	0.813	0.287	0.555	0.42	0.56	0.547	0.801	0.372	0	0	0	As548_TRINITY_DN16001_c0_g1	0	NA	NA	NA	6983	3088	5337	NA	NA	NA	NA	NA	NA	NA	NA	NA	NA
TRINITY_DN12961_c0_g2_i1	821	2	NA	NA	NA	TRINITY_DN12961_c0_g2	922	NA	NA	NA	NA	0	0	0.232	0	0	0	0	0.469	1049	0.586	0.503	1002	0	0	0	0.499	0	1691	1118	1194	As548_TRINITY_DN2634_c0_g2	5.38e-177	NA	NA	NA	3287	1161	7022	NA	NA	NA	NA	NA	NA	NA	NA	NA	NA
TRINITY_DN12965_c0_g2_i2	1361	2	NA	NA	NA	TRINITY_DN12965_c0_g2	1575	NA	NA	NA	NA	0.19	0	0.278	0	0.243	0.238	0	0	0.332	0.228	0	0.171	0.176	0	0.336	0.156	0	0	0.075	0.3	As548_TRINITY_DN6546_c0_g1	0	NA	NA	NA	2028	0.431	4.37	NA	NA	NA	NA	NA	NA	NA	NA	NA	NA
TRINITY_DN12965_c0_g2_i3	1361	2	NA	NA	NA	TRINITY_DN12965_c0_g2	1575	NA	NA	NA	NA	0.19	0	0.614	0.987	0.243	0.444	0	0	0.374	0.228	0	0.459	0.606	0.227	0.384	0	0.105	0.53	0.193	0	As548_TRINITY_DN6546_c0_g1	0	NA	NA	NA	2028	0.431	4.37	NA	NA	NA	NA	NA	NA	NA	NA	NA	NA
TRINITY_DN12991_c0_g1_i6	2220	2	NA	NA	NA	TRINITY_DN12991_c0_g1	2738	NA	NA	NA	NA	0	0.638	0.892	0	0	0.207	0	0.31	0.997	0	0.395	0.981	0.342	0.621	0.557	0.364	0.611	0.998	0	0	As548_TRINITY_DN5690_c0_g1	0	NA	NA	NA	1678	3175	2856	chr6S	794512633	83529	85	8.54e-12	78.7	NA	NA	NA	NA
TRINITY_DN13061_c0_g1_i9	1314	2	NA	NA	NA	TRINITY_DN13061_c0_g1	2796	NA	NA	NA	NA	0.217	0.349	0.336	1047	0.294	0.269	0	0.124	0.457	0.325	0	0.501	0.938	0.023	0.384	0.541	0.59	0	0.279	0	As548_TRINITY_DN91143_c0_g1	0	NA	NA	NA	4375	3721	5326	NA	NA	NA	NA	NA	NA	NA	NA	NA	NA
TRINITY_DN13099_c0_g2_i1	227	2	NA	NA	NA	TRINITY_DN13099_c0_g2	227	NA	NA	NA	NA	0	0	10633	0	0	0	0	0	0	0	0	0	0	0	0	18365	0	0	0	0	As548_TRINITY_DN955_c0_g1	2.96e-94	NA	NA	NA	4835	8964	8376	NA	NA	NA	NA	NA	NA	NA	NA	NA	NA
TRINITY_DN130_c1_g1_i19	3221	2	NA	NA	NA	TRINITY_DN130_c1_g1	3919	NA	NA	NA	NA	0.474	0.711	0.243	0	1298	0.909	0.92	1.07	0.509	0.477	0.691	0.267	0.841	1446	0.576	1738	1075	0.825	0	0	As548_TRINITY_DN762_c0_g2	0	NA	NA	NA	9011	7169	6.84	NA	NA	NA	NA	NA	NA	NA	NA	NA	NA
TRINITY_DN13102_c1_g1_i7	2327	2	NA	NA	NA	TRINITY_DN13102_c1_g1	4273	NA	NA	NA	NA	0.406	0.65	0.185	0.722	0.862	0.537	0.93	0.628	0.187	0.705	0.781	0.437	1124	0.689	0.537	0.114	0.934	0	0	0	As548_TRINITY_DN271_c0_g2	0	NA	NA	NA	3386	1469	1.24	NA	NA	NA	NA	NA	NA	NA	NA	NA	NA
TRINITY_DN13189_c0_g1_i5	2034	2	NA	NA	NA	TRINITY_DN13189_c0_g1	2391	NA	NA	NA	jcf7180001921421	0.556	0.939	0.869	0	2159	0.982	0	0.018	1.35	0	1643	0.672	0.02	0	1526	0.739	0	0	0.656	1344	As548_TRINITY_DN18416_c0_g1	0	NA	NA	NA	10139	4715	6157	chr6B	219013881	96.57	554	0	907	chr6B	219013219	97.24	471
TRINITY_DN1318_c0_g1_i1	680	2	NA	NA	NA	TRINITY_DN1318_c0_g1	1419	NA	NA	NA	NA	1775	0.325	2803	1.42	0.953	5343	0	0.999	2254	2461	1167	3349	0.205	3316	5575	1124	1054	2751	4675	2285	As548_TRINITY_DN532_c0_g1	1.25e-75	NA	NA	NA	49628	20073	144688	NA	NA	NA	NA	NA	NA	NA	NA	NA	NA
TRINITY_DN13199_c0_g2_i12	2779	2	NA	NA	NA	TRINITY_DN13199_c0_g2	3670	NA	NA	NA	NA	0.461	0	0.857	0	0.314	0.641	0	0.133	1215	0	0.215	0.555	0.303	0.363	1219	0.166	0.183	0	0	0	As548_TRINITY_DN3784_c0_g5	0	NA	NA	NA	1578	1495	3676	NA	NA	NA	NA	NA	NA	NA	NA	NA	NA
TRINITY_DN13212_c0_g1_i14	2859	2	NA	NA	NA	TRINITY_DN13212_c0_g1	4592	NA	NA	NA	jcf7180001627532	0	0.217	0.29	0	0.081	0.114	0	0	0.197	0.271	0	0.235	0.254	0	0.355	0	0.021	0.56	0	0	As548_TRINITY_DN5010_c0_g1	4.8e-139	NA	NA	NA	1309	1487	6817	chr6S	414579237	89787	891	0	1105	chr6S	414579041	94.57	221
TRINITY_DN1321_c0_g1_i8	1695	2	NA	NA	NA	TRINITY_DN1321_c0_g1	5772	NA	NA	NA	NA	0	0	0.533	0	0.628	0.393	0	0.486	0.644	1214	0.602	0.672	0.332	1764	1046	1436	1637	2211	0	1549	As548_TRINITY_DN816_c0_g1	0	NA	NA	NA	8791	9702	7898	NA	NA	NA	NA	NA	NA	NA	NA	NA	NA
TRINITY_DN13258_c0_g2_i7	441	2	NA	NA	NA	TRINITY_DN13258_c0_g2	1015	NA	NA	NA	NA	0	0	0.255	0	0	0.269	1772	0	0.904	0	1356	0.085	0.821	0	0	0	0.969	0	0	0	As548_TRINITY_DN4534_c1_g1	8.54e-101	NA	NA	NA	0.44	0.431	1434	chr6S	468748094	96552	58	8.59e-18	97.1	chr6S	68972363	95238	42
TRINITY_DN13268_c0_g1_i9	650	2	NA	NA	NA	TRINITY_DN13268_c0_g1	2140	NA	NA	NA	jcf7180001893147	1247	2926	2676	0	2.99	2873	0	1079	2929	1193	1508	3573	1212	0.326	2255	1249	0	2078	4482	4285	As548_TRINITY_DN35407_c0_g1	2.49e-59	NA	NA	NA	2797	2885	3892	chr6S	53920086	92952	227	4.63e-88	331	chr6S	717015896	94712	208
TRINITY_DN13270_c0_g1_i17	2060	2	NA	NA	NA	TRINITY_DN13270_c0_g1	6540	NA	NA	NA	NA	0	0.65	0.266	0	0.182	0.341	0	0	0.062	0	0.099	0.512	0	0.159	0.393	0.062	0.077	0.428	0	0	As548_TRINITY_DN14033_c0_g1	0	NA	NA	NA	1179	2102	2.39	NA	NA	NA	NA	NA	NA	NA	NA	NA	NA
TRINITY_DN1328_c0_g1_i16	1325	2	NA	NA	NA	TRINITY_DN1328_c0_g1	2256	NA	NA	NA	jcf7180001521795	7872	8.96	10668	0	0	0.238	14708	0.46	10022	6734	5028	16797	15709	1688	13943	17418	1798	6724	0	2245	As548_TRINITY_DN59761_c0_g1	0	NA	NA	NA	100295	20909	108795	chr6B	166113463	99051	316	3.42e-159	568	chr6B	166112831	99315	292
TRINITY_DN1331_c0_g1_i5	3134	2	NA	NA	NA	TRINITY_DN1331_c0_g1	3769	NA	NA	NA	jcf7180001926546	1612	4.95	2004	0.566	2575	0.703	0	2344	0.893	0	1131	0.608	1691	4.99	1919	1.79	6026	0	0.58	0	As548_TRINITY_DN25_c0_g1	0	NA	NA	NA	16543	16344	11062	chr6S	295136115	83553	152	4.12e-31	143	NA	NA	NA	NA
TRINITY_DN13336_c0_g1_i1	1263	2	NA	NA	NA	TRINITY_DN13336_c0_g1	2290	NA	NA	NA	NA	0	0	0.266	0	1551	1437	0	0	2233	0.455	0	1.13	0.137	0.621	1161	0.052	0	3271	0.247	0	As548_TRINITY_DN2838_c0_g1	0	NA	NA	NA	1728	1.68	32559	chr6B	536816010	79464	112	3.32e-10	73.1	NA	NA	NA	NA
TRINITY_DN1334_c2_g1_i2	1178	2	NA	NA	NA	TRINITY_DN1334_c2_g1	1495	NA	NA	NA	NA	1423	2.36	1054	0	0.912	0.403	1508	3255	1807	0	6509	0.565	0	8442	2178	0.198	4369	1386	0.258	6719	As548_TRINITY_DN436_c0_g6	0	NA	NA	NA	4016	12.64	4.7	chr6S	784918245	84135	208	2.63e-49	202	NA	NA	NA	NA
TRINITY_DN13368_c0_g1_i8	2107	2	NA	NA	NA	TRINITY_DN13368_c0_g1	2748	NA	NA	NA	NA	1504	0.157	2189	0.818	0	1933	0	0.177	1288	1941	0.269	2069	1574	0.591	2178	1217	0.414	0	0.376	1937	As548_TRINITY_DN7188_c0_g1	0	NA	NA	NA	9.92	11083	17434	NA	NA	NA	NA	NA	NA	NA	NA	NA	NA
TRINITY_DN1342_c0_g1_i11	2135	2	NA	NA	NA	TRINITY_DN1342_c0_g1	3949	NA	NA	NA	NA	0.23	0.458	1.61	1396	1358	3028	2.36	0	3895	1507	0.772	3445	0.997	0	3435	1124	1412	0	0	1036	As548_TRINITY_DN1611_c0_g1	0	NA	NA	NA	4365	9377	11.21	NA	NA	NA	NA	NA	NA	NA	NA	NA	NA
TRINITY_DN13432_c0_g1_i10	1554	2	NA	NA	NA	TRINITY_DN13432_c0_g1	2505	NA	NA	NA	NA	0	0.747	0.869	0.77	0.081	0.434	0	0.363	1631	0	0.521	1.44	0.635	0.636	1.19	0.51	0.695	0.52	0.365	0.324	As548_TRINITY_DN10389_c0_g1	2.49e-174	NA	NA	NA	3067	1328	2048	NA	NA	NA	NA	NA	NA	NA	NA	NA	NA
TRINITY_DN13432_c0_g1_i3	855	2	NA	NA	NA	TRINITY_DN13432_c0_g1	2505	NA	NA	NA	NA	0.352	0.614	0	0.71	0	0	0	0	0	0	1104	0	0	0.704	0	0.104	0	0	0	0	As548_TRINITY_DN10389_c0_g1	2.49e-174	NA	NA	NA	3067	1328	2048	NA	NA	NA	NA	NA	NA	NA	NA	NA	NA
TRINITY_DN1344_c0_g1_i37	2844	2	NA	NA	NA	TRINITY_DN1344_c0_g1	3453	NA	NA	NA	jcf7180001896520	0	0.024	0	0	0	0.021	0	0	0	0	0	0	0	0	0.01	0	0	0	0	0	As548_TRINITY_DN2466_c0_g1	0	NA	NA	NA	1728	4495	5599	chr6B	157666435	80843	261	2.22e-43	183	NA	NA	NA	NA
TRINITY_DN13467_c0_g1_i3	488	2	NA	NA	NA	TRINITY_DN13467_c0_g1	1533	NA	NA	NA	NA	0	0	0.336	0	1.46	2139	0	0.619	1402	0	2128	1472	1877	1189	2265	1041	1791	0	0	0	As548_TRINITY_DN22005_c1_g1	1.4e-50	NA	NA	NA	5724	0	0	chr6S	35312050	100	34	1.33e-07	63.9	NA	NA	NA	NA
TRINITY_DN13471_c0_g1_i7	1145	2	NA	NA	NA	TRINITY_DN13471_c0_g1	1469	NA	NA	NA	jcf7180001938707	0.325	0.59	0.846	0.662	0.213	0.713	0.754	0	0.571	0.586	0	0.907	0.313	0	0.777	0.187	0.435	0.835	0.935	1834	As548_TRINITY_DN416_c3_g1	4.33e-125	NA	NA	NA	1648	2806	2185	chr6S	607680367	99083	109	1.2e-47	196	chr6S	19875454	97297	111
TRINITY_DN13475_c0_g1_i13	2526	2	NA	NA	NA	TRINITY_DN13475_c0_g1	3443	NA	NA	NA	jcf7180001890827	0.637	0.711	0.394	0.265	0.142	1282	0.842	0.248	0.727	0	0.09	0.619	0.714	0.613	0.537	0.801	0.379	0.489	0.29	0	As548_TRINITY_DN3765_c0_g2	0	NA	NA	NA	2138	3651	0.637	chr6B	389252405	96802	469	0	774	chr6B	184798276	93235	473
TRINITY_DN1347_c0_g1_i8	2001	2	NA	NA	NA	TRINITY_DN1347_c0_g1	4353	NA	NA	NA	NA	5528	6106	5247	5211	4957	4041	2546	5846	4289	4.11	3825	4842	8045	6171	6746	11.31	8674	2.71	3052	4617	As548_TRINITY_DN2400_c0_g2	0	NA	NA	NA	14325	12192	11972	NA	NA	NA	NA	NA	NA	NA	NA	NA	NA
TRINITY_DN13559_c0_g1_i6	1792	2	NA	NA	NA	TRINITY_DN13559_c0_g1	3376	NA	NA	NA	NA	0	0.349	0.127	0	0.142	0.083	0	0	0.218	0	0	0.107	0	0	0.202	0	0.105	0	0	0	As548_TRINITY_DN246_c3_g1	0	NA	NA	NA	1818	3686	1502	NA	NA	NA	NA	NA	NA	NA	NA	NA	NA
TRINITY_DN13593_c0_g1_i5	2144	2	NA	NA	NA	TRINITY_DN13593_c0_g1	3089	NA	NA	NA	NA	0.339	0	0.371	0	0	0.227	0	0.203	0.343	0	0	0.171	0	0	0.509	0.291	0.885	0	0	0	As548_TRINITY_DN9974_c0_g1	0	NA	NA	NA	1808	1223	2822	NA	NA	NA	NA	NA	NA	NA	NA	NA	NA
TRINITY_DN13599_c0_g1_i4	2859	2	NA	NA	NA	TRINITY_DN13599_c0_g1	3561	NA	NA	NA	NA	1.49	2806	2884	0.566	2889	3462	1557	3131	3812	2.06	3.16	3093	2502	4603	3.1	2185	4263	3841	0	2008	As548_TRINITY_DN4364_c0_g1	0	NA	NA	NA	7602	4249	4825	NA	NA	NA	NA	NA	NA	NA	NA	NA	NA
TRINITY_DN1359_c0_g1_i10	4004	2	NA	NA	NA	TRINITY_DN1359_c0_g1	4318	NA	NA	NA	NA	1111	1325	0.313	0	0.933	0.424	0	1618	0.82	0	1.58	0.288	1652	1908	0.547	1571	1995	1131	0.204	0.743	As548_TRINITY_DN49_c1_g1	0	NA	NA	NA	4405	9439	1343	NA	NA	NA	NA	NA	NA	NA	NA	NA	NA
TRINITY_DN13600_c0_g1_i8	3023	2	NA	NA	NA	TRINITY_DN13600_c0_g1	3880	NA	NA	NA	NA	0	0.12	0.556	0	0	0.785	0	0.044	0.249	0	0.233	0.757	0.43	0.341	0.873	0.208	0.014	0	0.258	0.435	As548_TRINITY_DN4229_c0_g1	0	NA	NA	NA	1438	0.906	2629	NA	NA	NA	NA	NA	NA	NA	NA	NA	NA
TRINITY_DN13612_c0_g2_i1	1913	2	NA	NA	NA	TRINITY_DN13612_c0_g2	2256	NA	NA	NA	jcf7180001617161	0.732	0.711	7807	2961	1338	15.11	3134	1.45	12536	3144	1167	13726	1916	1984	10134	2331	0.281	17046	3052	0.324	As548_TRINITY_DN3630_c1_g1	0	NA	NA	NA	1898	0.422	3596	NA	NA	NA	NA	NA	NA	NA	NA	NA	NA
TRINITY_DN13617_c0_g1_i2	598	2	NA	NA	NA	TRINITY_DN13617_c0_g1	627	NA	NA	NA	NA	0	0.747	0.313	0	0	0	0	0	0.166	0	0	0.288	0	0	0.269	0	0	0	0	0	As548_TRINITY_DN49615_c0_g1	1.04e-152	NA	NA	NA	0	1909	0.41	NA	NA	NA	NA	NA	NA	NA	NA	NA	NA
TRINITY_DN1365_c1_g1_i6	2833	2	NA	NA	NA	TRINITY_DN1365_c1_g1	3324	NA	NA	NA	NA	0.325	0.843	0.023	0	0.03	0.103	0	1786	0	0	0.862	0	0.127	2158	0.048	0.156	1363	0	0	2.98	As548_TRINITY_DN10371_c0_g4	0	NA	NA	NA	0	3985	0.341	NA	NA	NA	NA	NA	NA	NA	NA	NA	NA
TRINITY_DN13683_c0_g1_i10	5313	2	NA	NA	NA	TRINITY_DN13683_c0_g1	6150	NA	NA	NA	NA	0.041	0	0.463	0	0.081	0.61	0	0	0.8	0.022	0.126	0.683	0.137	0	0.835	0.291	0	0	0	0	As548_TRINITY_DN20955_c0_g1	0	NA	NA	NA	1099	0.281	2014	chr6B	711497628	95294	85	1.13e-28	135	NA	NA	NA	NA
TRINITY_DN13693_c0_g1_i3	734	2	NA	NA	NA	TRINITY_DN13693_c0_g1	1376	NA	NA	NA	NA	1477	1626	1552	0	0.963	0.475	0	1088	2.15	2.06	0	0.203	0.43	0.394	0.269	0.531	0.962	0	1171	2024	As548_TRINITY_DN40192_c0_g1	3.38e-71	NA	NA	NA	3396	291811	23193	chr6S	780104593	96296	54	1.96e-15	89.8	NA	NA	NA	NA
TRINITY_DN13693_c0_g1_i6	278	2	NA	NA	NA	TRINITY_DN13693_c0_g1	1376	NA	NA	NA	NA	0	0	1761	0	0	0	0	0	0	6419	4112	0	0	0	0	0	0	0	6911	0	As548_TRINITY_DN40192_c0_g1	3.38e-71	NA	NA	NA	3396	291811	23193	chr6S	780104593	96296	54	1.96e-15	89.8	NA	NA	NA	NA
TRINITY_DN1370_c0_g2_i5	800	2	NA	NA	NA	TRINITY_DN1370_c0_g2	1162	NA	NA	NA	NA	0.718	0	1645	0	1024	0.506	0.842	0	0.893	0	1984	1397	0.772	0	7869	1155	0.119	1009	0	9312	As548_TRINITY_DN54206_c0_g1	3.43e-120	NA	NA	NA	0	0	1775	NA	NA	NA	NA	NA	NA	NA	NA	NA	NA
TRINITY_DN13720_c0_g1_i18	3819	2	NA	NA	NA	TRINITY_DN13720_c0_g1	4769	NA	NA	NA	jcf7180001935998	0	0.831	1008	0	0.456	1809	0	0	1.88	0	0.485	2314	1105	0.53	2629	0.603	0.021	1701	0	1115	As548_TRINITY_DN10793_c0_g1	0	NA	NA	NA	54763	45451	59143	chr6S	62906558	89916	1071	0	1323	chr6S	62900876	95402	783
TRINITY_DN13759_c0_g1_i8	2822	2	NA	NA	NA	TRINITY_DN13759_c0_g1	3395	NA	NA	NA	NA	0.027	0.626	1181	0	0.193	0.951	0	0	1246	0	0.144	0.981	0.87	0.348	2246	0.874	0.33	0	0	0.735	As548_TRINITY_DN25022_c0_g1	0	NA	NA	NA	1119	2859	3881	NA	NA	NA	NA	NA	NA	NA	NA	NA	NA
TRINITY_DN1376_c0_g1_i4	3016	2	NA	NA	NA	TRINITY_DN1376_c0_g1	4042	NA	NA	NA	NA	0.569	0.349	3903	1023	0	4868	0	0	2929	0	0.557	4191	0.547	0.151	4309	2508	0.105	2282	0	0.925	As548_TRINITY_DN64455_c0_g1	0	NA	NA	NA	2677	2331	13281	NA	NA	NA	NA	NA	NA	NA	NA	NA	NA
TRINITY_DN1377_c0_g1_i4	794	2	NA	NA	NA	TRINITY_DN1377_c0_g1	1520	NA	NA	NA	NA	0	0.915	5317	5861	5089	5746	0	7234	6803	6.43	7731	5.78	4.33	6511	9136	6337	9215	3.26	2547	3462	As548_TRINITY_DN117_c0_g2	1.32e-85	NA	NA	NA	5664	9236	7044	NA	NA	NA	NA	NA	NA	NA	NA	NA	NA
TRINITY_DN1379_c0_g2_i1	4465	2	NA	NA	NA	TRINITY_DN1379_c0_g2	4561	NA	NA	NA	jcf7180001663438	1802	2409	1749	0	3274	2057	0.969	1893	2503	2364	1185	2602	1144	0	2409	1.29	2318	4279	1515	2506	As548_TRINITY_DN34961_c0_g1	0	NA	NA	NA	1289	2313	2174	chr6B	525114447	75852	675	1.29e-86	327	chr6B	239357333	73427	429
TRINITY_DN13827_c0_g1_i1	1923	2	NA	NA	NA	TRINITY_DN13827_c0_g1	2366	NA	NA	NA	jcf7180001638550	0.42	0.494	0.475	0	0.01	0.827	0	0	0	1377	0	0.384	0.381	0.477	0.729	0.593	0.267	0	0.892	0	As548_TRINITY_DN7241_c0_g1	0	NA	NA	NA	2787	2938	2834	chr6B	344290741	85345	116	1.56e-23	117	NA	NA	NA	NA
TRINITY_DN13835_c0_g1_i2	1971	2	NA	NA	NA	TRINITY_DN13835_c0_g1	2294	NA	NA	NA	NA	0.461	1373	0.718	0	0.943	0.527	0.539	1265	0.426	0	0.395	0.565	0.733	1567	0.278	0.583	2346	0.316	0	0.751	As548_TRINITY_DN15914_c0_g1	0	NA	NA	NA	3716	3369	0.717	NA	NA	NA	NA	NA	NA	NA	NA	NA	NA
TRINITY_DN13870_c0_g1_i10	2766	2	NA	NA	NA	TRINITY_DN13870_c0_g1	3593	NA	NA	NA	NA	0.257	0.819	1135	0.59	0.77	0.765	0	1778	1309	0.184	1212	0.949	0.108	0.583	0.873	0.323	0.948	0.662	0	0.403	As548_TRINITY_DN11690_c0_g1	0	NA	NA	NA	10349	8559	4768	NA	NA	NA	NA	NA	NA	NA	NA	NA	NA
TRINITY_DN13870_c0_g1_i17	2971	2	NA	NA	NA	TRINITY_DN13870_c0_g1	3593	NA	NA	NA	NA	0	1024	0.695	0	0.892	1044	0	0.725	0.28	1377	0.341	1461	1105	1476	0.787	1238	1208	0.713	1666	0.198	As548_TRINITY_DN11690_c0_g1	0	NA	NA	NA	10349	8559	4768	NA	NA	NA	NA	NA	NA	NA	NA	NA	NA
TRINITY_DN13889_c0_g1_i2	2214	2	NA	NA	NA	TRINITY_DN13889_c0_g1	3234	NA	NA	NA	jcf7180001559676	0.122	0.169	0.035	0	0	0.134	0.568	0	0.093	0	0	0.224	0.254	0.469	0.202	0.125	0.084	0.295	0.451	0	As548_TRINITY_DN18530_c0_g1	0	NA	NA	NA	3177	3132	3892	NA	NA	NA	NA	NA	NA	NA	NA	NA	NA
TRINITY_DN1391_c0_g1_i9	2657	2	NA	NA	NA	TRINITY_DN1391_c0_g1	3270	NA	NA	NA	NA	9241	10754	12637	9965	9529	14851	4074	9401	17.78	9347	8242	12083	8651	11213	13281	10395	11589	16811	6.61	5581	As548_TRINITY_DN2642_c1_g1	0	NA	NA	NA	82224	47615	102012	NA	NA	NA	NA	NA	NA	NA	NA	NA	NA
TRINITY_DN1394_c0_g1_i2	3770	2	NA	NA	NA	TRINITY_DN1394_c0_g1	5526	NA	NA	NA	NA	1084	1445	0.903	0.626	1156	1075	0.705	0.336	1111	0.716	1526	1162	1163	1545	1257	1425	2.43	0.499	0.505	0.617	As548_TRINITY_DN6586_c0_g2	0	NA	NA	NA	4805	6.43	5349	NA	NA	NA	NA	NA	NA	NA	NA	NA	NA
TRINITY_DN13972_c0_g1_i2	784	2	NA	NA	NA	TRINITY_DN13972_c0_g1	1415	NA	NA	NA	NA	1165	3565	0.961	0	0.081	1912	1547	0.433	1142	1713	0.512	1312	1613	0.75	1056	0.26	1482	2873	1612	0.024	As548_TRINITY_DN8262_c0_g4	0	NA	NA	NA	8042	4293	4586	NA	NA	NA	NA	NA	NA	NA	NA	NA	NA
TRINITY_DN13973_c0_g1_i2	2999	2	NA	NA	NA	TRINITY_DN13973_c0_g1	3242	NA	NA	NA	jcf7180001551470	1274	3179	1.1	0	1946	1158	2007	3794	1028	1551	3.34	0.181	0.039	1431	0.134	2414	1812	0	0	0	As548_TRINITY_DN104_c2_g1	0	NA	NA	NA	4965	8779	3573	NA	NA	NA	NA	NA	NA	NA	NA	NA	NA
TRINITY_DN1399_c0_g2_i4	4021	2	NA	NA	NA	TRINITY_DN1399_c0_g2	5286	NA	NA	NA	jcf7180001890427	0	0.47	0	0.879	0	0.289	0	0	0	0	0	0	0.293	0	0.25	0	0	0	0	0	As548_TRINITY_DN11854_c0_g1	0	NA	NA	NA	4415	5973	1684	chr6S	12989211	96891	1608	0	2673	chr6S	12990425	97858	1214
TRINITY_DN14037_c0_g1_i7	570	2	NA	NA	NA	TRINITY_DN14037_c0_g1	1083	NA	NA	NA	jcf7180001891329	2791	2963	5096	0.048	7694	1075	0	7765	5.66	0.184	7865	3573	1.3	11546	3771	4245	5837	3189	2031	10972	As548_TRINITY_DN2909_c0_g1	1.59e-68	NA	NA	NA	41037	104774	68122	chr6B	465683904	92982	57	7.14e-14	84.2	NA	NA	NA	NA
TRINITY_DN14044_c0_g1_i11	1578	2	NA	NA	NA	TRINITY_DN14044_c0_g1	2065	NA	NA	NA	NA	0	0	0.707	0	0.233	0.3	0	0.345	0.27	0	0	0.864	0.244	0.469	0.374	0.177	0.541	0	0	0	As548_TRINITY_DN2439_c0_g1	0	NA	NA	NA	1688	0.387	1.73	NA	NA	NA	NA	NA	NA	NA	NA	NA	NA
TRINITY_DN14085_c0_g1_i4	8478	2	NA	NA	NA	TRINITY_DN14085_c0_g1	8599	NA	NA	NA	jcf7180001891095	0.366	0.53	0.637	0	0	0.217	0	0.212	0.364	0.423	0	0.651	0.068	0.583	0.297	0.031	0.351	0.194	0	0	As548_TRINITY_DN10979_c0_g2	0	NA	NA	NA	1209	3563	2071	chr6S	520649848	95928	835	0	1328	chr6S	520635568	98.92	741
TRINITY_DN14141_c0_g1_i2	1867	2	NA	NA	NA	TRINITY_DN14141_c0_g1	2643	NA	NA	NA	NA	1125	0.843	1564	0	0.943	1633	0	1813	1797	1475	1598	1973	1525	2082	2025	1602	2753	0.622	0	1494	As548_TRINITY_DN3189_c0_g1	0	NA	NA	NA	3936	3061	4085	chr6S	145318361	94444	54	6.37e-13	82.4	NA	NA	NA	NA
TRINITY_DN14175_c0_g1_i7	1316	2	NA	NA	NA	TRINITY_DN14175_c0_g1	1833	NA	NA	NA	jcf7180001910322	0.434	0	1019	0	0.628	1726	0.519	0	1828	0.358	0	1536	1.31	0.886	1718	0.437	0.815	0.55	0.849	0.387	As548_TRINITY_DN6829_c0_g2	7.45e-79	NA	NA	NA	0.21	0.018	2868	chr6S	12780052	85333	75	9.52e-10	71.3	chr6S	112297094	93333	45
TRINITY_DN1418_c0_g2_i3	1055	2	NA	NA	NA	TRINITY_DN1418_c0_g2	2858	NA	NA	NA	jcf7180001650939	1951	5323	4448	2407	4369	2584	4299	4.13	5214	0.77	5531	3701	3294	2393	4942	4287	7663	3097	0.828	5581	As548_TRINITY_DN26937_c0_g1	0	NA	NA	NA	10239	14092	11676	NA	NA	NA	NA	NA	NA	NA	NA	NA	NA
TRINITY_DN14192_c0_g1_i2	1077	2	NA	NA	NA	TRINITY_DN14192_c0_g1	1460	NA	NA	NA	jcf7180001722606	0	1144	0	0	0	0	0	4006	0	0	2047	0.011	0	0	0.048	0.146	0.19	0	0	2656	As548_TRINITY_DN11695_c0_g1	0	NA	NA	NA	0.17	5.7	0.467	NA	NA	NA	NA	NA	NA	NA	NA	NA	NA
TRINITY_DN1422_c0_g1_i31	2143	2	NA	NA	NA	TRINITY_DN1422_c0_g1	3659	NA	NA	NA	jcf7180001646273	0.556	0	2942	0	3345	3214	2017	6.35	3905	0	4076	2314	0.782	0	2341	2466	4.32	2618	0	0	As548_TRINITY_DN4682_c0_g1	0	NA	NA	NA	18521	20452	12109	chr6S	733416700	86184	152	3.07e-37	163	NA	NA	NA	NA
TRINITY_DN1422_c0_g1_i7	2143	2	NA	NA	NA	TRINITY_DN1422_c0_g1	3659	NA	NA	NA	jcf7180001646273	2913	3011	2.12	1673	4045	2201	0.979	7287	3116	1876	4166	2368	3685	3551	2745	6243	5036	1345	3364	3818	As548_TRINITY_DN4682_c0_g1	0	NA	NA	NA	18521	20452	12109	chr6S	733416700	86184	152	3.07e-37	163	NA	NA	NA	NA
TRINITY_DN14236_c0_g1_i2	1016	2	NA	NA	NA	TRINITY_DN14236_c0_g1	1295	NA	NA	NA	NA	0.718	0.879	0.324	0	0.902	0.217	0	0.31	0	0.022	0.18	0.064	0.078	0.25	0.528	0.479	1454	0	0	0	As548_TRINITY_DN61_c3_g1	4.99e-114	NA	NA	NA	0.24	1363	0.717	NA	NA	NA	NA	NA	NA	NA	NA	NA	NA
TRINITY_DN14258_c0_g3_i2	1291	2	NA	NA	NA	TRINITY_DN14258_c0_g3	1357	NA	NA	NA	NA	0.786	0.879	0.88	0.349	0.852	1902	0.206	0.071	0.966	0	0.26	1781	0.508	1408	0.912	1571	1342	0.387	0.441	1439	As548_TRINITY_DN81956_c0_g1	6.49e-143	NA	NA	NA	3416	0	1252	NA	NA	NA	NA	NA	NA	NA	NA	NA	NA
TRINITY_DN14262_c0_g1_i5	570	2	NA	NA	NA	TRINITY_DN14262_c0_g1	959	NA	NA	NA	NA	0.474	0	0.892	0	0.872	0.527	0	0.115	0.758	0	0	0.213	0.997	0	0.605	0	0.33	0.672	0	0	As548_TRINITY_DN1224_c1_g1	1.08e-74	NA	NA	NA	3626	2489	4165	NA	NA	NA	NA	NA	NA	NA	NA	NA	NA
TRINITY_DN14286_c1_g4_i1	298	2	NA	NA	NA	TRINITY_DN14286_c1_g4	298	NA	NA	NA	NA	0	3071	0	0	0	0	0	0	0	0	0	0	0	0	0	0	0	0	0	0	As548_TRINITY_DN11987_c2_g1	1.97e-52	NA	NA	NA	0	7539	0	NA	NA	NA	NA	NA	NA	NA	NA	NA	NA
TRINITY_DN14298_c0_g1_i2	523	2	NA	NA	NA	TRINITY_DN14298_c0_g1	577	NA	NA	NA	NA	0	0.289	0	0.915	0	0	0	0	0	0	0	0	0	0.485	0	0	0	0	0	0	As548_TRINITY_DN7629_c0_g2	3.96e-52	NA	NA	NA	9.81	44633	13133	NA	NA	NA	NA	NA	NA	NA	NA	NA	NA
TRINITY_DN14312_c0_g1_i6	2238	2	NA	NA	NA	TRINITY_DN14312_c0_g1	2238	NA	NA	NA	jcf7180001538699	0.081	1108	2965	0	0	2005	0	0.027	2.96	1095	0.018	2432	1623	0.023	1132	1987	0.99	0.153	2289	0	As548_TRINITY_DN74871_c0_g1	0	NA	NA	NA	2258	6307	12177	chr6B	164036942	98157	814	0	1421	chr6B	164036213	97538	731
TRINITY_DN14328_c0_g1_i1	2297	2	NA	NA	NA	TRINITY_DN14328_c0_g1	2952	NA	NA	NA	NA	0.285	0.686	0.336	0.53	0.071	0.558	0	1026	1039	0	0.404	0.587	1173	0.644	0.393	0.395	0.773	0.204	0.462	0.561	As548_TRINITY_DN9259_c0_g1	0	NA	NA	NA	0.769	1504	1411	NA	NA	NA	NA	NA	NA	NA	NA	NA	NA
TRINITY_DN1436_c0_g1_i10	1607	2	NA	NA	NA	TRINITY_DN1436_c0_g1	2973	NA	NA	NA	NA	0	0.409	0.208	0.686	0	0.858	0	1132	0.01	0	0	0.864	1584	0	0	0.687	0.112	0	0.032	0	As548_TRINITY_DN9883_c1_g3	0	NA	NA	NA	11068	9034	10174	NA	NA	NA	NA	NA	NA	NA	NA	NA	NA
TRINITY_DN1451_c0_g1_i16	1417	2	NA	NA	NA	TRINITY_DN1451_c0_g1	2793	NA	NA	NA	jcf7180001923804	0	1265	0.359	0	1145	0	0	0.053	0	1464	0	0	1564	0.129	0	0	0.73	0.438	0.118	0	As548_TRINITY_DN34679_c3_g2	1.19e-48	NA	NA	NA	0	0	0.296	chr6S	360756552	94776	134	1.07e-50	207	chr6S	360762680	94776	134
TRINITY_DN1452_c0_g1_i4	2708	2	NA	NA	NA	TRINITY_DN1452_c0_g1	3962	NA	NA	NA	jcf7180001894456	0.447	2517	3046	0	1419	3007	0	0.177	2981	0.065	0.027	2879	1975	1.37	3867	1904	0.351	0.479	1333	0.545	As548_TRINITY_DN31339_c0_g1	0	NA	NA	NA	7422	6043	13907	chr6S	37705696	98883	358	4.54e-180	638	chr6S	37703643	89046	283
TRINITY_DN1452_c0_g1_i6	2661	2	NA	NA	NA	TRINITY_DN1452_c0_g1	3962	NA	NA	NA	jcf7180001894456	0.474	0.313	1.61	0	0	1633	0	0.195	1267	1247	0.09	1866	1427	0.31	0.892	0.957	0.218	0.56	0	0.308	As548_TRINITY_DN31339_c0_g1	0	NA	NA	NA	7422	6043	13907	chr6S	37705696	98883	358	4.54e-180	638	chr6S	37703643	89046	283
TRINITY_DN1453_c2_g1_i2	1188	2	NA	NA	NA	TRINITY_DN1453_c2_g1	1294	NA	NA	NA	NA	1626	0	1888	0.602	0	1654	0	0	0.405	0	0.925	3199	0.831	0.439	1996	0.364	0	0.234	1687	0	As548_TRINITY_DN74759_c0_g1	0	NA	NA	NA	1648	0	1411	NA	NA	NA	NA	NA	NA	NA	NA	NA	NA
TRINITY_DN14551_c0_g1_i1	229	2	NA	NA	NA	TRINITY_DN14551_c0_g1	257	NA	NA	NA	NA	0	0	19344	0	0	10697	0	0	13304	0	15129	0	0	12803	0	0	6195	0	0	0	As548_TRINITY_DN2950_c0_g1	4.49e-78	NA	NA	NA	15254	18859	8.41	NA	NA	NA	NA	NA	NA	NA	NA	NA	NA
TRINITY_DN14591_c0_g1_i10	229	2	NA	NA	NA	TRINITY_DN14591_c0_g1	2454	NA	NA	NA	NA	0	21641	0	0	0	0	0	0	0	0	0	0	0	0	0	12.85	0	0	0	0	As548_TRINITY_DN102932_c0_g1	3.5e-98	NA	NA	NA	0	8163	0	chr6B	74727384	94186	86	2.08e-27	130	chr6B	439333576	94186	86
TRINITY_DN1460_c0_g1_i14	2825	2	NA	NA	NA	TRINITY_DN1460_c0_g1	6676	NA	NA	NA	NA	0.217	2047	1506	1492	1409	1819	0.96	2653	1901	0.586	1625	1621	1505	2468	1747	1717	1433	0.591	0.924	1194	As548_TRINITY_DN6288_c0_g1	0	NA	NA	NA	19.37	19774	28303	NA	NA	NA	NA	NA	NA	NA	NA	NA	NA
TRINITY_DN1460_c0_g1_i9	5410	2	NA	NA	NA	TRINITY_DN1460_c0_g1	6676	NA	NA	NA	NA	0.718	1963	1529	1468	2179	2129	0	2.14	2233	0.163	2343	2794	2014	2226	1948	2716	2114	2384	1268	2.98	As548_TRINITY_DN6288_c0_g1	0	NA	NA	NA	19.37	19774	28303	NA	NA	NA	NA	NA	NA	NA	NA	NA	NA
TRINITY_DN14612_c0_g1_i8	1522	2	NA	NA	NA	TRINITY_DN14612_c0_g1	2220	NA	NA	NA	NA	0.108	0	1575	0	1531	0.909	0	0.177	1.88	0.911	0	1301	0.665	0.401	1017	0.603	0.386	1936	0	1.02	As548_TRINITY_DN2928_c1_g1	0	NA	NA	NA	11868	16616	16865	NA	NA	NA	NA	NA	NA	NA	NA	NA	NA
TRINITY_DN14653_c0_g1_i6	507	2	NA	NA	NA	TRINITY_DN14653_c0_g1	1100	NA	NA	NA	jcf7180001939456	0	0	0.88	0	0.487	0	0	0.283	0.592	0	0	0.288	0.831	0	0.662	0.447	0.414	0	0	0	As548_TRINITY_DN29989_c0_g2	3.31e-105	NA	NA	NA	0.749	1117	1286	chr6B	396296856	97826	506	0	872	chr6B	651661533	92114	317
TRINITY_DN14757_c0_g1_i6	1754	2	NA	NA	NA	TRINITY_DN14757_c0_g1	2028	NA	NA	NA	NA	0.894	4962	0.255	0	4.45	0.145	0.441	16626	8039	0	12.39	6431	1134	21.73	6381	0	8.59	5573	1053	70989	As548_TRINITY_DN2696_c0_g2	0	NA	NA	NA	0.05	2709	3835	NA	NA	NA	NA	NA	NA	NA	NA	NA	NA
TRINITY_DN14830_c1_g1_i7	3775	2	NA	NA	NA	TRINITY_DN14830_c1_g1	4789	NA	NA	NA	NA	0.461	0.951	0.718	0.337	1419	1292	0.705	0.495	0.893	1095	1194	0.97	1134	1348	0.71	0.302	1306	0.306	0	0.727	As548_TRINITY_DN4695_c0_g1	0	NA	NA	NA	1299	1821	0.728	chr6S	14400846	94286	595	0	898	chr6S	14401172	94512	328
TRINITY_DN1485_c0_g1_i3	2982	2	NA	NA	NA	TRINITY_DN1485_c0_g1	5186	NA	NA	NA	NA	1694	2047	2039	0.265	3893	1137	0.48	3.98	1714	1204	1939	2218	2815	2408	0.749	3444	3912	0.397	0	2032	As548_TRINITY_DN4657_c0_g1	0	NA	NA	NA	3017	6307	5.03	chr6B	539277853	96154	52	9.72e-14	86.1	chr6B	695474426	97.5	40
TRINITY_DN14872_c0_g1_i9	953	2	NA	NA	NA	TRINITY_DN14872_c0_g1	1934	NA	NA	NA	jcf7180001938707	0	0.723	0.718	0	0	1891	0	0.248	1402	0	0	0.843	0.674	1855	0.988	0.603	1285	1243	0	0.743	As548_TRINITY_DN17223_c0_g1	5.83e-110	NA	NA	NA	0	1812	0.171	chr6B	25750184	84838	277	1.19e-68	267	chr6B	25750515	89474	114
TRINITY_DN14902_c0_g1_i3	929	2	NA	NA	NA	TRINITY_DN14902_c0_g1	1129	NA	NA	NA	NA	0	0.662	1865	2636	2413	0	0	6385	2731	0	0	1.61	4262	5.55	1814	1103	0	0	0	5889	As548_TRINITY_DN22367_c0_g1	1.43e-173	NA	NA	NA	9.37	12588	17343	NA	NA	NA	NA	NA	NA	NA	NA	NA	NA
TRINITY_DN14943_c0_g1_i2	3190	2	NA	NA	NA	TRINITY_DN14943_c0_g1	4146	NBSLRR	166	3510	NA	0.041	0.422	0.533	0	0	0.217	0	0.371	0.249	0	0.332	0.437	0.323	0.31	0.768	0.146	0.4	0	0.129	0	As548_TRINITY_DN10975_c0_g1	0	NBSLRR	9	648	2328	0	1548	NA	NA	NA	NA	NA	NA	NA	NA	NA	NA
TRINITY_DN14948_c0_g1_i1	2009	2	NA	NA	NA	TRINITY_DN14948_c0_g1	3025	NA	NA	NA	NA	0.176	0.349	0.058	0.337	0	0.382	0	0	0	0.77	0	0.053	0.235	0.144	0.144	0	0	0	0	0	As548_TRINITY_DN63586_c0_g1	5.92e-57	NA	NA	NA	0	0	6373	NA	NA	NA	NA	NA	NA	NA	NA	NA	NA
TRINITY_DN1496_c0_g1_i3	769	2	NA	NA	NA	TRINITY_DN1496_c0_g1	1962	NA	NA	NA	NA	2.1	23388	4564	0.229	31952	1654	3075	75146	10.23	0	37656	5204	1486	38985	8665	1228	29486	11106	1612	51281	As548_TRINITY_DN4234_c0_g2	2.73e-113	NA	NA	NA	0	19062	4245	NA	NA	NA	NA	NA	NA	NA	NA	NA	NA
TRINITY_DN1496_c0_g1_i7	899	2	NA	NA	NA	TRINITY_DN1496_c0_g1	1962	NA	NA	NA	NA	1.07	1469	0.695	0	2423	1.23	0	11232	2794	0.575	2945	0.949	0	8503	2015	0.166	4896	0	0.408	12435	As548_TRINITY_DN4234_c0_g2	2.73e-113	NA	NA	NA	0	19062	4245	NA	NA	NA	NA	NA	NA	NA	NA	NA	NA
TRINITY_DN15094_c0_g1_i5	1474	2	NA	NA	NA	TRINITY_DN15094_c0_g1	2830	NA	NA	NA	NA	0.718	1216	0.116	1805	0.568	0.093	0	2.22	0.135	0.531	1059	0.213	0.391	1401	0.192	1061	1622	0	1591	0	As548_TRINITY_DN118_c2_g1	0	NA	NA	NA	1159	1812	1718	chr6S	796631171	91837	49	5.32e-09	69.4	NA	NA	NA	NA
TRINITY_DN150_c0_g1_i5	2686	2	NA	NA	NA	TRINITY_DN150_c0_g1	3362	NA	NA	NA	jcf7180001526977	0	0.06	0.232	0	0	0.01	0	0	0.083	0.011	0.593	0.043	0.274	0.318	0.058	0.094	0.351	0	0	0	As548_TRINITY_DN8421_c1_g1	0	NA	NA	NA	0.17	0.537	0.319	chr6B	461679291	91568	593	0	806	chr6B	461680895	81705	481
TRINITY_DN15163_c6_g1_i4	336	2	NA	NA	NA	TRINITY_DN15163_c6_g1	643	NA	NA	NA	NA	0.217	0.867	0.556	0	0	0.816	0	0	1091	0	0	0	0.381	0	0.393	0	0	0	0	0	As548_TRINITY_DN42135_c0_g2	1.56e-66	NA	NA	NA	0	0	2162	NA	NA	NA	NA	NA	NA	NA	NA	NA	NA
TRINITY_DN15188_c1_g1_i1	2240	2	NA	NA	NA	TRINITY_DN15188_c1_g1	2240	NA	NA	NA	NA	0.65	1542	1263	0.253	0.578	1075	1146	0.805	1267	0	0.575	1.29	1349	0.681	1622	0.624	0.723	0.917	0.398	0.577	As548_TRINITY_DN670_c4_g1	0	NA	NA	NA	1039	0.405	0.99	NA	NA	NA	NA	NA	NA	NA	NA	NA	NA
TRINITY_DN15230_c0_g1_i1	970	2	NA	NA	NA	TRINITY_DN15230_c0_g1	1626	NA	NA	NA	NA	0.312	0.349	0.174	0	0	0	0	0.088	0.125	0	0.359	0.277	0	0.401	0.106	0.083	0.246	0	0	1217	As548_TRINITY_DN102449_c0_g1	9.93e-152	NA	NA	NA	0.32	0.633	0.159	NA	NA	NA	NA	NA	NA	NA	NA	NA	NA
TRINITY_DN15250_c0_g2_i2	2658	2	NA	NA	NA	TRINITY_DN15250_c0_g2	3273	NA	NA	NA	NA	0	0	0.197	0	0.193	0	0	0.062	0	0	0.144	0	0.01	0.151	0	0	0	0	0.075	0	As548_TRINITY_DN20059_c0_g1	0	NA	NA	NA	0.05	0.238	3164	NA	NA	NA	NA	NA	NA	NA	NA	NA	NA
TRINITY_DN1525_c0_g1_i16	1527	2	NA	NA	NA	TRINITY_DN1525_c0_g1	2043	NA	NA	NA	NA	0	0.626	0.382	0	0.375	0.32	0	0	0.779	0	0.26	0.779	0.313	0.371	0.825	0.385	0.218	0	0	0	As548_TRINITY_DN11893_c0_g1	9.68e-153	NA	NA	NA	3287	7679	5144	NA	NA	NA	NA	NA	NA	NA	NA	NA	NA
TRINITY_DN15262_c0_g1_i6	10502	2	NA	NA	NA	TRINITY_DN15262_c0_g1	11233	NA	NA	NA	jcf7180001530542	0	1048	0.88	0	0.659	0.269	0	0.946	0.415	1052	0	1109	1388	1189	0.585	1571	1433	0	0	0	As548_TRINITY_DN29790_c0_g1	0	NA	NA	NA	0.699	0.132	1.4	chr6S	627038989	96214	898	0	1469	chr6S	627040790	97027	841
TRINITY_DN15265_c0_g1_i9	1001	2	NA	NA	NA	TRINITY_DN15265_c0_g1	1480	NA	NA	NA	NA	0.705	0	1436	2239	0.476	1271	0	0	1433	1139	1751	1824	0.792	1211	2236	1.02	0.59	0	2472	0	As548_TRINITY_DN5326_c0_g1	2.62e-122	NA	NA	NA	4735	4213	9787	NA	NA	NA	NA	NA	NA	NA	NA	NA	NA
TRINITY_DN15266_c0_g1_i6	382	2	NA	NA	NA	TRINITY_DN15266_c0_g1	830	NA	NA	NA	jcf7180001889625	0	8009	2826	4176	5616	2377	12.26	18696	0.852	0	3017	1344	8211	5724	0.825	5015	11617	0	0.634	15826	As548_TRINITY_DN2909_c0_g2	9.3e-75	NA	NA	NA	3826	10995	2.97	chr6S	514036517	87.5	80	9.03e-17	93.5	NA	NA	NA	NA
TRINITY_DN15277_c0_g1_i2	1284	2	NA	NA	NA	TRINITY_DN15277_c0_g1	2353	NA	NA	NA	jcf7180001621680	0.108	0.735	0.811	0	0.618	0.424	0.509	0.805	0.249	0	0.943	0.32	0.411	1166	0.374	0.635	0.752	0.958	0.097	0.854	As548_TRINITY_DN10921_c0_g1	6.03e-46	NA	NA	NA	1608	2085	0.728	chr6S	682752039	98198	111	6.98e-47	195	chr6S	376409437	90909	110
TRINITY_DN15310_c0_g1_i10	2204	2	NA	NA	NA	TRINITY_DN15310_c0_g1	2951	NA	NA	NA	NA	0.366	1409	0.208	0	1703	0.134	0	1.38	0.291	0.163	1392	0.096	1017	1113	0.163	0.187	0.569	0	0	0	As548_TRINITY_DN4545_c0_g1	0	NA	NA	NA	18511	42979	38249	NA	NA	NA	NA	NA	NA	NA	NA	NA	NA
TRINITY_DN15310_c0_g1_i5	2163	2	NA	NA	NA	TRINITY_DN15310_c0_g1	2951	NA	NA	NA	NA	0.095	0.638	0	0	0.497	0	0	0.646	0	0	1472	0	0.293	1098	0.058	0.708	0.709	0	0	0.482	As548_TRINITY_DN4545_c0_g1	0	NA	NA	NA	18511	42979	38249	NA	NA	NA	NA	NA	NA	NA	NA	NA	NA
TRINITY_DN15341_c0_g1_i1	1315	2	NA	NA	NA	TRINITY_DN15341_c0_g1	1455	NA	NA	NA	jcf7180001892286	0.827	2457	0.88	1408	1997	0.062	0	0	1.62	0	1293	0.512	1926	0.848	0.547	0.676	0.674	2955	1268	0	As548_TRINITY_DN905_c0_g1	2.44e-162	NA	NA	NA	4385	7.38	9741	chr6B	531796357	98309	414	0	725	chr6B	531739916	89737	419
TRINITY_DN15372_c0_g1_i8	1538	2	NA	NA	NA	TRINITY_DN15372_c0_g1	2089	NA	NA	NA	jcf7180001927651	1328	1554	0.614	1252	0.618	0.537	0	0.513	0.717	0.076	0.62	0	1437	1242	0	0	1166	0.835	1.01	0.308	As548_TRINITY_DN62706_c0_g1	1.09e-82	NA	NA	NA	0	0	1172	chr6B	709994631	97464	276	9.17e-130	470	chr6B	709995045	96457	254
TRINITY_DN1547_c0_g2_i6	1318	2	NA	NA	NA	TRINITY_DN1547_c0_g2	1771	NA	NA	NA	NA	0	0	0.892	0	0.76	0.382	0	0.203	0.717	0	0	0.416	0	0	1008	0.427	0	1141	0	0	As548_TRINITY_DN4898_c0_g1	0	NA	NA	NA	1608	8401	6123	NA	NA	NA	NA	NA	NA	NA	NA	NA	NA
TRINITY_DN1556_c1_g1_i2	1473	2	NA	NA	NA	TRINITY_DN1556_c1_g1	1649	NA	NA	NA	jcf7180001887286	1138	0.47	4714	0	0.071	2739	2634	1008	3593	0	0.646	2741	2014	1484	4.99	0.76	0.253	1243	1376	0	As548_TRINITY_DN412_c1_g4	0	NA	NA	NA	45622	26847	64275	chr6B	415730160	77.32	388	8.02e-55	220	chr6B	509915353	81061	132
TRINITY_DN15650_c0_g1_i3	2546	2	NA	NA	NA	TRINITY_DN15650_c0_g1	3106	NA	NA	NA	NA	0	0.578	1425	1769	0.172	0.827	0.499	0	0.987	0	0.682	1376	0.919	0	1842	1915	0.386	0	0	0.198	As548_TRINITY_DN777_c0_g1	0	NA	NA	NA	3337	2665	3.79	NA	NA	NA	NA	NA	NA	NA	NA	NA	NA
TRINITY_DN15671_c0_g1_i13	2922	2	NA	NA	NA	TRINITY_DN15671_c0_g1	3508	NA	NA	NA	jcf7180001559889	0.393	0.602	0.452	0.265	0.081	0.527	0	0.044	0.353	0.336	0.224	0.181	0.567	0.447	0.182	0.697	0.295	0.183	0.15	0.166	As548_TRINITY_DN4516_c0_g3	1.98e-32	NA	NA	NA	1718	1064	0.262	chr6B	151877032	96629	89	8.25e-33	148	chr6B	151876134	95506	89
TRINITY_DN1568_c0_g1_i9	2616	2	NA	NA	NA	TRINITY_DN1568_c0_g1	3490	NA	NA	NA	jcf7180001896550	0	0.385	0.788	0.349	0	0	0	0.38	0.249	0	0	0	0.332	0	0.345	1238	1356	1834	0.774	1549	As548_TRINITY_DN6581_c0_g1	0	NA	NA	NA	4555	9315	5087	chr6B	661859895	94574	516	0	789	chr6B	661855666	98765	243
TRINITY_DN15697_c0_g3_i1	591	2	NA	NA	NA	TRINITY_DN15697_c0_g3	591	NA	NA	NA	NA	0.935	0	2595	11482	0.73	6191	0	0	2742	1475	0.673	6.09	0.89	0.621	5431	5.13	0	14223	1558	1462	As548_TRINITY_DN5707_c0_g1	1.76e-100	NA	NA	NA	119345	53667	198038	NA	NA	NA	NA	NA	NA	NA	NA	NA	NA
TRINITY_DN1570_c0_g1_i22	1623	2	NA	NA	NA	TRINITY_DN1570_c0_g1	3018	NA	NA	NA	NA	2.1	2613	0.591	1492	3416	1085	0.783	4988	2347	2461	7084	2037	0.704	4384	1833	1103	2606	2731	0.086	6087	As548_TRINITY_DN1600_c0_g1	4.99e-177	NA	NA	NA	31527	106542	10561	NA	NA	NA	NA	NA	NA	NA	NA	NA	NA
TRINITY_DN15743_c0_g1_i2	2360	2	NA	NA	NA	TRINITY_DN15743_c0_g1	4895	NA	NA	NA	jcf7180001524112	0	0.048	0	0.313	0.091	0	0	0	0	0	0.826	0	0	1635	0	1145	0.548	0.245	3106	0	As548_TRINITY_DN11881_c0_g1	0	NA	NA	NA	3337	5638	5132	chr6S	793532870	98148	216	1.35e-101	377	chr6S	9628441	97087	206
TRINITY_DN15760_c0_g1_i2	2184	2	NA	NA	NA	TRINITY_DN15760_c0_g1	2761	NA	NA	NA	NA	0	0.373	0.649	0	0.456	0.393	0	0.15	0.644	0	0	0.661	0	0.538	0.403	0.406	0.379	0.53	0	0	As548_TRINITY_DN15695_c0_g1	0	NA	NA	NA	0.929	1.61	5269	NA	NA	NA	NA	NA	NA	NA	NA	NA	NA
TRINITY_DN15764_c0_g1_i7	1207	2	NA	NA	NA	TRINITY_DN15764_c0_g1	2835	NA	NA	NA	jcf7180001895275	0.285	1108	0.371	0	0.933	0.279	0	0.371	0.166	0	0.395	0.629	0.567	0.969	0.173	0.271	1.44	0	0	0.332	As548_TRINITY_DN19480_c0_g3	1.39e-132	NA	NA	NA	0	0	6.35	chr6B	558302802	96.25	80	6.7e-28	132	chr6B	693560340	95	80
TRINITY_DN15770_c0_g1_i1	1451	2	NA	NA	NA	TRINITY_DN15770_c0_g1	1691	NA	NA	NA	NA	0.515	0.674	0.683	0.156	0.223	1095	0.323	0	0.914	0.26	0.485	0.853	0.743	0	1142	0.728	0.119	0	0.849	0	As548_TRINITY_DN15052_c0_g1	0	NA	NA	NA	58689	10556	13827	NA	NA	NA	NA	NA	NA	NA	NA	NA	NA
TRINITY_DN15776_c0_g1_i4	4101	2	NA	NA	NA	TRINITY_DN15776_c0_g1	4239	NA	NA	NA	NA	0.42	0.193	0.486	0.241	0	0.455	0.48	0.248	0.706	0.813	0.458	0.576	0.176	0.674	0.691	0.312	0	0.316	0.107	0	As548_TRINITY_DN13743_c0_g1	0	NA	NA	NA	1718	1047	1411	chr6S	181480533	85714	98	7.88e-19	102	chr6S	22644009	80315	127
TRINITY_DN1578_c0_g1_i2	3609	2	NBSLRR	275	3346	TRINITY_DN1578_c0_g1	4503	NBSLRR	275	4240	NA	1531	0.915	4448	5115	5555	10542	4397	5492	10178	3448	2388	9417	1652	1802	7994	3153	3702	6439	4116	8229	As548_TRINITY_DN82218_c0_g1	0	NBSLRR	126	1019	0.24	1126	0.489	NA	NA	NA	NA	NA	NA	NA	NA	NA	NA
TRINITY_DN1579_c0_g1_i10	8928	2	NA	NA	NA	TRINITY_DN1579_c0_g1	9267	NA	NA	NA	jcf7180001752881	0.393	1	1.1	0	0.274	1106	1146	0.486	1828	1941	0.467	1013	0.596	1393	1545	1051	0.737	0.245	0.118	1123	As548_TRINITY_DN6697_c0_g1	0	NA	NA	NA	8131	9.72	6.84	NA	NA	NA	NA	NA	NA	NA	NA	NA	NA
TRINITY_DN1584_c0_g1_i1	2139	2	NA	NA	NA	TRINITY_DN1584_c0_g1	2520	NA	NA	NA	NA	1545	0.494	3.29	0.229	1541	2687	1116	0.654	4279	0	0.952	3775	1476	1476	4174	0.884	1721	0	0	0.64	As548_TRINITY_DN6888_c0_g1	0	NA	NA	NA	3846	16141	7317	NA	NA	NA	NA	NA	NA	NA	NA	NA	NA
TRINITY_DN158_c0_g1_i10	1684	2	NA	NA	NA	TRINITY_DN158_c0_g1	3650	NA	NA	NA	NA	0	1493	1541	1.24	1956	1788	0	0.982	1194	0	1805	1866	0.499	1.62	2524	0.447	1665	4371	0.634	0.704	As548_TRINITY_DN12558_c0_g1	0	NA	NA	NA	3736	4697	8569	NA	NA	NA	NA	NA	NA	NA	NA	NA	NA
TRINITY_DN158_c0_g1_i3	3256	2	NA	NA	NA	TRINITY_DN158_c0_g1	3650	NA	NA	NA	NA	0.23	0.253	0	0	0	0.031	0	0	0	1171	0	1152	0	0.008	0	0	0	0	0	0	As548_TRINITY_DN12558_c0_g1	0	NA	NA	NA	3736	4697	8569	NA	NA	NA	NA	NA	NA	NA	NA	NA	NA
TRINITY_DN158_c0_g1_i9	3256	2	NA	NA	NA	TRINITY_DN158_c0_g1	3650	NA	NA	NA	NA	0.962	1542	1726	0	1237	2501	0.529	1786	3635	0.759	1544	2474	0.89	2809	2543	2175	3603	0.357	0	0.885	As548_TRINITY_DN12558_c0_g1	0	NA	NA	NA	3736	4697	8569	NA	NA	NA	NA	NA	NA	NA	NA	NA	NA
TRINITY_DN15900_c0_g1_i5	1909	2	NA	NA	NA	TRINITY_DN15900_c0_g1	2729	NA	NA	NA	NA	0.366	0.422	0.591	0	0.466	0.63	0	0.371	0.353	0	0.35	0.309	0.528	0	0.633	0.479	0.33	0.713	0	0	As548_TRINITY_DN20155_c0_g1	0	NA	NA	NA	1628	1056	0.523	chr6B	677007779	92513	187	4.71e-69	268	chr6B	677305134	90374	187
TRINITY_DN15905_c0_g1_i7	886	2	NA	NA	NA	TRINITY_DN15905_c0_g1	5458	NA	NA	NA	NA	0	0.458	0.51	0	0.831	0.506	0	0	1111	0.933	0.655	1258	0.156	0	0.768	0.458	0.176	0	0	0	As548_TRINITY_DN4276_c0_g1	0	NA	NA	NA	1129	6272	7488	NA	NA	NA	NA	NA	NA	NA	NA	NA	NA
TRINITY_DN15912_c0_g1_i25	1764	2	NA	NA	NA	TRINITY_DN15912_c0_g1	3057	NA	NA	NA	jcf7180001524123	2723	2.3	2768	3538	1358	3317	1714	2246	4071	4272	1607	3125	1183	1658	2735	2445	2676	3953	0.795	1123	As548_TRINITY_DN2423_c0_g1	0	NA	NA	NA	6633	5964	13531	chr6S	169721012	100	410	0	758	chr6S	169718974	97059	238
TRINITY_DN15923_c0_g1_i9	1492	2	NA	NA	NA	TRINITY_DN15923_c0_g1	2357	NA	NA	NA	jcf7180001524488	0	0.289	0.104	0	0	0	0	0	0.166	0	0	0	0	0	0.029	0	0	0	0	0	As548_TRINITY_DN2638_c0_g1	0	NA	NA	NA	3716	5999	2378	chr6B	484986207	94754	629	0	953	chr6B	484983563	98039	255
TRINITY_DN15937_c1_g1_i1	332	2	NA	NA	NA	TRINITY_DN15937_c1_g1	406	NA	NA	NA	NA	1125	0	1517	0	0	0	0	0	0.488	0	0	0	0	0	1094	0.229	3898	0	0	0	As548_TRINITY_DN19617_c0_g1	9.9e-47	NA	NA	NA	1868	12975	0.979	NA	NA	NA	NA	NA	NA	NA	NA	NA	NA
TRINITY_DN15948_c1_g1_i5	1226	2	NA	NA	NA	TRINITY_DN15948_c1_g1	2097	NA	NA	NA	jcf7180001926766	0	0.373	0.023	0	0.598	0.527	0	0	0.239	0	0	0.32	0	0.227	0.499	0	0	0.01	0	0	As548_TRINITY_DN11215_c0_g1	4.96e-101	NA	NA	NA	1658	0.114	3084	chr6B	29445595	90805	174	1.32e-58	233	NA	NA	NA	NA
TRINITY_DN15961_c0_g1_i1	490	2	NA	NA	NA	TRINITY_DN15961_c0_g1	490	NA	NA	NA	NA	0	0	0.266	2395	0.395	0.145	0	0	0	0	0	0.139	0.704	0	0	0.208	0	0	0	0	As548_TRINITY_DN24258_c1_g2	1.19e-56	NA	NA	NA	22456	22352	6157	NA	NA	NA	NA	NA	NA	NA	NA	NA	NA
TRINITY_DN1597_c0_g1_i6	1653	2	NA	NA	NA	TRINITY_DN1597_c0_g1	2230	NA	NA	NA	NA	1518	3408	3475	2359	2646	3421	4025	2803	4289	3979	2.37	4.01	5836	3362	4961	5067	3905	0.601	0.494	3589	As548_TRINITY_DN16873_c0_g1	0	NA	NA	NA	15754	10142	22692	NA	NA	NA	NA	NA	NA	NA	NA	NA	NA
TRINITY_DN15991_c0_g1_i4	804	2	NA	NA	NA	TRINITY_DN15991_c0_g1	1395	NA	NA	NA	NA	0	0	2803	0	1328	2015	0	0	3801	1865	0	1781	0	0	5115	0.146	0	5125	0	0	As548_TRINITY_DN45086_c0_g1	0	NA	NA	NA	0.41	0.677	1127	NA	NA	NA	NA	NA	NA	NA	NA	NA	NA
TRINITY_DN1601_c0_g1_i9	546	2	NA	NA	NA	TRINITY_DN1601_c0_g1	1381	NA	NA	NA	NA	0	0.06	0	0	0	0	0	0	0	0	1446	0	0	0	0	0	0	0	0	0	As548_TRINITY_DN109_c0_g1	1.55e-84	NA	NA	NA	110125	23636	6305	NA	NA	NA	NA	NA	NA	NA	NA	NA	NA
TRINITY_DN1604_c0_g1_i1	3767	2	NA	NA	NA	TRINITY_DN1604_c0_g1	5788	NA	NA	NA	NA	0.596	1337	1448	0	0.892	1912	0.029	0.672	1412	1.42	2352	1152	2121	1075	1353	1582	1.32	0.082	1204	0.198	As548_TRINITY_DN2220_c0_g1	0	NA	NA	NA	16053	9861	15022	chr6S	399595052	83.2	125	1.38e-22	115	NA	NA	NA	NA
TRINITY_DN160_c0_g1_i11	2627	2	NA	NA	NA	TRINITY_DN160_c0_g1	3375	NA	NA	NA	jcf7180001937526	2466	7178	1714	0	5139	1.86	1498	8897	2887	1594	7443	2346	2981	9979	2121	3663	10936	2017	0.795	4585	As548_TRINITY_DN668_c0_g2	0	NA	NA	NA	18411	18991	12598	chr6S	130493692	93	200	3.46e-76	292	chr6S	82855737	92.5	200
TRINITY_DN16145_c0_g1_i3	2773	2	NA	NA	NA	TRINITY_DN16145_c0_g1	2974	NA	NA	NA	NA	0.42	0.566	0.764	0	0.476	0.93	0	0.61	0.831	0.163	0.368	0.97	0.225	0.568	0.326	0.312	0.983	0.092	0.57	0	As548_TRINITY_DN20140_c0_g1	0	NA	NA	NA	3856	2313	1718	NA	NA	NA	NA	NA	NA	NA	NA	NA	NA
TRINITY_DN16149_c0_g1_i8	1006	2	NA	NA	NA	TRINITY_DN16149_c0_g1	1415	NA	NA	NA	NA	3184	7491	0.846	9749	22.17	4661	12946	0	4892	3741	3214	1408	1378	1136	3637	0	1573	7366	9361	3684	As548_TRINITY_DN74340_c0_g1	8.89e-132	NA	NA	NA	2048	18604	19847	chr6S	467729049	83616	354	1.84e-80	305	chr6S	467454438	94643	56
TRINITY_DN16195_c0_g1_i3	296	2	NA	NA	NA	TRINITY_DN16195_c0_g1	938	NA	NA	NA	NA	0	0	0.776	9388	0	1819	0	0	0.436	0	0	0.363	0	0	0	1217	0.737	7631	0	0	As548_TRINITY_DN1425_c0_g1	4.98e-63	NA	NA	NA	9.39	10204	7238	chr6S	203636320	98889	90	2.77e-37	161	NA	NA	NA	NA
TRINITY_DN16217_c0_g1_i5	722	2	NA	NA	NA	TRINITY_DN16217_c0_g1	1021	NA	NA	NA	NA	0	0.361	0.822	1613	0.801	1116	0	0.097	0.083	0.943	0.135	0.533	1046	0.22	0.71	0.166	1061	1437	0.161	0	As548_TRINITY_DN17737_c0_g1	8.41e-116	NA	NA	NA	0	1003	2253	NA	NA	NA	NA	NA	NA	NA	NA	NA	NA
TRINITY_DN16223_c0_g1_i2	1369	2	NA	NA	NA	TRINITY_DN16223_c0_g1	1790	NA	NA	NA	jcf7180001931139	0	0.626	0.776	0	0	1.24	0	0	0.779	0.39	0	0.885	0.342	0.371	1228	0.198	0.225	0	0	0	As548_TRINITY_DN19185_c0_g1	2.34e-158	NA	NA	NA	1968	0.413	0.592	chr6B	671560708	95261	211	2.98e-89	335	chr6B	689835701	92437	119
TRINITY_DN16223_c0_g1_i4	1327	2	NA	NA	NA	TRINITY_DN16223_c0_g1	1790	NA	NA	NA	jcf7180001931139	0.163	0.422	0.127	0	0.689	0.837	1234	0.469	0.623	0	0.485	0.821	0.196	0.22	0.23	0.832	0.752	0.438	0	0.142	As548_TRINITY_DN19185_c0_g1	2.34e-158	NA	NA	NA	1968	0.413	0.592	chr6B	671560708	95261	211	2.98e-89	335	chr6B	689835701	92437	119
TRINITY_DN16247_c0_g1_i4	3610	2	NA	NA	NA	TRINITY_DN16247_c0_g1	6499	NA	NA	NA	NA	0.339	0.193	0.764	0.385	0.112	0.176	0	0.088	0.478	0.531	0.224	0.885	0.283	0	0.461	0.291	0.176	0	0.172	0.071	As548_TRINITY_DN4532_c0_g1	0	NA	NA	NA	3586	4662	4.29	chr6B	52458848	82353	136	2.01e-21	111	NA	NA	NA	NA
TRINITY_DN16289_c0_g1_i8	1569	2	NA	NA	NA	TRINITY_DN16289_c0_g1	1989	NA	NA	NA	NA	1057	1433	0	2215	3467	1054	0	2653	0.904	2179	4238	1216	1554	1348	0.624	0.749	1426	0	0.484	3273	As548_TRINITY_DN2285_c0_g1	0	NA	NA	NA	6403	10336	2834	NA	NA	NA	NA	NA	NA	NA	NA	NA	NA
TRINITY_DN16294_c0_g1_i2	824	2	NA	NA	NA	TRINITY_DN16294_c0_g1	1069	NA	NA	NA	NA	0	0.277	0.44	1.24	0.132	0.527	1616	0	0.935	1345	0.386	0.235	0.831	0	1008	0.458	0.358	0	0	0.253	As548_TRINITY_DN8771_c0_g1	1.45e-123	NA	NA	NA	1009	0.44	0.296	NA	NA	NA	NA	NA	NA	NA	NA	NA	NA
TRINITY_DN1630_c0_g1_i12	381	2	NA	NA	NA	TRINITY_DN1630_c0_g1	2423	NA	NA	NA	NA	0	5431	0	0	0	0	0	0	0.208	0	2891	0.533	0.968	0	0	0	0	0	0	0	As548_TRINITY_DN6865_c0_g1	1.24e-97	NA	NA	NA	9.89	6685	7921	NA	NA	NA	NA	NA	NA	NA	NA	NA	NA
TRINITY_DN1633_c1_g1_i3	741	2	NA	NA	NA	TRINITY_DN1633_c1_g1	787	NA	NA	NA	jcf7180001933240	0	0.229	0.255	1083	0	0	0	0	0.177	0	0	0.203	0	0	0.307	0.156	0.063	0	0	0	As548_TRINITY_DN10036_c0_g1	8.32e-115	NA	NA	NA	3756	1706	3562	chr6S	499134699	83626	342	2.2e-72	278	chr6S	499132676	100	86
TRINITY_DN16394_c0_g1_i2	2385	2	NA	NA	NA	TRINITY_DN16394_c0_g1	2651	NA	NA	NA	jcf7180001721451	0	0	0.313	0	0	0	0	0	0	0	0	0	0	0.712	0.058	0	0	0	0	0	As548_TRINITY_DN22965_c0_g1	0	NA	NA	NA	1019	1.24	2117	NA	NA	NA	NA	NA	NA	NA	NA	NA	NA
TRINITY_DN16394_c0_g1_i5	2083	2	NA	NA	NA	TRINITY_DN16394_c0_g1	2651	NA	NA	NA	jcf7180001721451	0.163	1.12	0.394	0	0.233	0.103	0	0.345	0.093	0.249	0	0.501	0.42	0.326	0.605	0.416	0.379	0.509	0	0	As548_TRINITY_DN22965_c0_g1	0	NA	NA	NA	1019	1.24	2117	NA	NA	NA	NA	NA	NA	NA	NA	NA	NA
TRINITY_DN1643_c0_g1_i3	1761	2	NA	NA	NA	TRINITY_DN1643_c0_g1	6006	NA	NA	NA	jcf7180001542787	0.786	0.241	1946	1167	1622	3328	0.969	0.743	3666	1214	0.961	4458	1906	0.742	4549	0.385	0.316	1661	0.086	0	As548_TRINITY_DN1792_c0_g1	0	NA	NA	NA	169203	120968	116067	chr6S	790927259	85821	134	6.59e-31	143	chr6S	790892973	79592	196
TRINITY_DN16493_c0_g1_i13	1106	2	NA	NA	NA	TRINITY_DN16493_c0_g1	2610	NA	NA	NA	NA	0	0.385	0.475	2552	1723	0.413	0	0	1.08	7005	0	0.864	0.215	0	0.768	0.968	0	1936	0	0	As548_TRINITY_DN13819_c0_g1	2.63e-164	NA	NA	NA	8511	8594	7727	chr6S	710462839	95.07	142	3.55e-55	222	chr6S	552458679	98131	107
TRINITY_DN1654_c0_g1_i11	1482	2	NA	NA	NA	TRINITY_DN1654_c0_g1	2407	NA	NA	NA	NA	1165	2637	1506	0	0	1199	2027	8278	1184	0.878	5324	0.864	0.557	3998	1967	0.271	5977	0.52	1526	3249	As548_TRINITY_DN798_c0_g1	4.29e-122	NA	NA	NA	4965	7591	2515	NA	NA	NA	NA	NA	NA	NA	NA	NA	NA
TRINITY_DN1662_c0_g1_i5	1664	2	NA	NA	NA	TRINITY_DN1662_c0_g1	2555	NA	NA	NA	NA	0.569	0.915	0.822	1589	0.862	1.23	0	0	0.789	0.325	0.305	1.45	1515	0.303	1.18	0.676	0.183	0	0	0.759	As548_TRINITY_DN6343_c0_g1	1.6e-136	NA	NA	NA	1309	1487	2868	NA	NA	NA	NA	NA	NA	NA	NA	NA	NA
TRINITY_DN166_c0_g1_i1	1245	2	NA	NA	NA	TRINITY_DN166_c0_g1	2265	NA	NA	NA	NA	0.271	0.819	1.1	0	0.912	0.775	0.783	0.964	1309	0	2299	2218	0	0.083	0.72	1478	2.55	0	0.473	1217	As548_TRINITY_DN257_c1_g1	0	NA	NA	NA	9.39	13766	10288	NA	NA	NA	NA	NA	NA	NA	NA	NA	NA
TRINITY_DN16717_c0_g1_i9	472	2	NA	NA	NA	TRINITY_DN16717_c0_g1	1870	NA	NA	NA	NA	0.312	1457	1019	0	0	0.537	1508	0	1454	0	0	0.97	2014	0	0.662	0.229	1075	0	0	4593	As548_TRINITY_DN4000_c0_g3	0	NA	NA	NA	55502	42056	50494	NA	NA	NA	NA	NA	NA	NA	NA	NA	NA
TRINITY_DN1672_c1_g1_i14	1482	2	NA	NA	NA	TRINITY_DN1672_c1_g1	2648	NA	NA	NA	jcf7180001631784	2615	3071	0.903	2792	3609	3638	3476	1813	1973	1355	2442	2144	4741	4.8	1766	3194	3.35	2618	0	3162	As548_TRINITY_DN6952_c0_g1	5.21e-52	NA	NA	NA	2607	3378	2.72	chr6S	255365452	93318	434	3.02e-180	638	chr6S	255366350	95436	241
TRINITY_DN1672_c4_g1_i4	2109	2	NA	NA	NA	TRINITY_DN1672_c4_g1	2511	NA	NA	NA	jcf7180001929598	0	0.819	0	0	0	0	0.49	0	0.26	0.022	0	0	0	0.53	0	0	0	0	0.086	0.016	As548_TRINITY_DN1049_c3_g1	0	NA	NA	NA	1828	1363	0.854	chr6B	140600909	93711	636	0	1000	chr6B	140602120	98718	156
TRINITY_DN16746_c0_g1_i7	1977	2	NA	NA	NA	TRINITY_DN16746_c0_g1	2567	NA	NA	NA	NA	1301	3143	0.405	2.19	1845	1064	3339	0.663	1682	1008	1167	1514	2893	2786	1372	3.59	3645	0	0	2435	As548_TRINITY_DN3088_c0_g1	0	NA	NA	NA	6084	3607	0.956	NA	NA	NA	NA	NA	NA	NA	NA	NA	NA
TRINITY_DN16863_c0_g1_i7	2280	2	NA	NA	NA	TRINITY_DN16863_c0_g1	2667	NA	NA	NA	jcf7180001935640	0.176	0.626	0.266	0	7268	0.765	0.617	5572	1745	0.564	5028	0.832	0	1984	0.653	0.208	5219	0.397	0.269	5486	As548_TRINITY_DN11794_c0_g1	0	NA	NA	NA	0.839	1179	1627	chr6B	547757809	86.62	142	1.74e-33	150	NA	NA	NA	NA
TRINITY_DN1691_c0_g1_i8	749	2	NA	NA	NA	TRINITY_DN1691_c0_g1	11906	NA	NA	NA	jcf7180001867620	2371	3396	0.347	7233	1014	0.878	5885	3051	0.519	4044	1.14	0.608	0.987	1658	0.413	0.572	0.92	2017	3429	3186	As548_TRINITY_DN226_c0_g1	0	NA	NA	NA	3477371	2579479	3121817	chr6B	111694970	97851	1768	0	3051	chr6B	111708060	97568	1768
TRINITY_DN16959_c0_g1_i3	304	2	NA	NA	NA	TRINITY_DN16959_c0_g1	1163	NA	NA	NA	jcf7180001928751	0	6.66	0	0	0	1943	0	0	0	0	4121	2879	3392	2014	1343	0	0.316	0	0	0	As548_TRINITY_DN16226_c0_g1	2.2e-72	NA	NA	NA	0.19	0	0	chr6B	76052542	87259	259	9.13e-73	279	chr6B	687400682	94.22	173
TRINITY_DN1697_c0_g1_i10	1959	2	NA	NA	NA	TRINITY_DN1697_c0_g1	2472	NA	NA	NA	jcf7180001893097	3.97	4179	1402	0.674	10056	2945	3868	9542	3884	3318	7389	2634	8319	4687	1679	4745	6321	1355	2289	6514	As548_TRINITY_DN193_c0_g2	0	NA	NA	NA	3157	5.04	2.06	chr6B	681922541	99731	372	0	682	chr6B	681918729	100	151
TRINITY_DN17038_c0_g1_i2	1727	2	NA	NA	NA	TRINITY_DN17038_c0_g1	2036	NA	NA	NA	NA	1043	0.06	1587	1071	0.132	1654	0.245	0.027	0.955	1355	0.117	2197	0.567	0.447	1.66	0.916	0.112	1049	0.838	0.142	As548_TRINITY_DN10001_c1_g1	0	NA	NA	NA	1199	0.493	2424	NA	NA	NA	NA	NA	NA	NA	NA	NA	NA
TRINITY_DN17039_c0_g1_i5	1677	2	NA	NA	NA	TRINITY_DN17039_c0_g1	2334	NA	NA	NA	NA	0.244	1132	0.486	0	0	0	0	0.327	0.55	0.369	0	0.203	0.694	0.053	0.297	0	0.442	0.326	1064	0.253	As548_TRINITY_DN7910_c0_g1	0	NA	NA	NA	1019	2014	2208	NA	NA	NA	NA	NA	NA	NA	NA	NA	NA
TRINITY_DN1705_c0_g1_i3	3747	2	NBSLRR	90	2885	TRINITY_DN1705_c0_g1	4647	NBSLRR	130	3081	jcf7180001654550	0.434	1867	0.811	0.686	0.588	0.021	0	1167	1028	0.651	1832	0.053	0.225	3051	2044	0	0.534	1121	0	0	As548_TRINITY_DN3744_c0_g1	0	NBSLRR	370	3306	2817	1407	3.05	chr6S	601857748	89.63	135	6.5e-40	172	chr6S	57822931	90625	128
TRINITY_DN1705_c0_g1_i3	3747	2	NBSLRR	90	2885	TRINITY_DN1705_c0_g1	4647	NBSLRR	130	3081	jcf7180001654550	0.434	1867	0.811	0.686	0.588	0.021	0	1167	1028	0.651	1832	0.053	0.225	3051	2044	0	0.534	1121	0	0	As548_TRINITY_DN3744_c0_g1	0	NBSLRR	370	3306	2817	1407	3.05	chr6S	601857748	89.63	135	6.5e-40	172	chr6S	57822931	90625	128
TRINITY_DN17065_c0_g1_i1	666	2	NA	NA	NA	TRINITY_DN17065_c0_g1	826	NA	NA	NA	jcf7180001932043	0.921	1674	0.718	0.518	1145	0.041	4612	0.858	0.935	0.553	0.817	0.203	1114	0.856	0.796	0.645	0.78	2802	0.355	0.466	As548_TRINITY_DN99741_c0_g1	6.39e-156	NA	NA	NA	15374	18305	9.07	chr6S	190197373	98507	335	7.26e-167	592	chr6S	190197148	99038	208
TRINITY_DN17099_c0_g1_i11	612	2	NA	NA	NA	TRINITY_DN17099_c0_g1	1801	NA	NA	NA	NA	0	0.12	0.44	0	0.547	0.434	0	0.973	0	0	1158	0	0	0	0.585	0.26	0.787	0	2193	0	As548_TRINITY_DN10946_c0_g1	9.54e-73	NA	NA	NA	17092	28254	13918	NA	NA	NA	NA	NA	NA	NA	NA	NA	NA
TRINITY_DN1712_c0_g1_i5	981	2	NA	NA	NA	TRINITY_DN1712_c0_g1	1401	NA	NA	NA	jcf7180001928763	9444	24062	7703	16079	26437	4.63	2908	26593	11507	19008	22527	11294	10968	20208	8857	6909	15017	20438	7986	14957	As548_TRINITY_DN1340_c0_g1	0	NA	NA	NA	55632	53579	41003	chr6B	518392779	92059	680	0	917	chr6B	518392099	100	292
TRINITY_DN17178_c0_g1_i8	1842	2	NA	NA	NA	TRINITY_DN17178_c0_g1	2592	NA	NA	NA	NA	0.569	0	0.718	0	0.466	0.021	0	0	0	0	0	0	0	0	0	0	0	0	0	0	As548_TRINITY_DN659_c0_g2	0	NA	NA	NA	1948	3589	3608	NA	NA	NA	NA	NA	NA	NA	NA	NA	NA
TRINITY_DN1717_c0_g1_i1	4295	2	NA	NA	NA	TRINITY_DN1717_c0_g1	4557	NA	NA	NA	NA	0.976	1746	1633	0	0.649	1085	0	0.654	1651	0	0.655	0.523	1036	0.833	1593	0	0.611	0.55	0	0.988	As548_TRINITY_DN3953_c1_g1	0	NA	NA	NA	1369	3008	1.98	NA	NA	NA	NA	NA	NA	NA	NA	NA	NA
TRINITY_DN1717_c0_g1_i4	3688	2	NA	NA	NA	TRINITY_DN1717_c0_g1	4557	NA	NA	NA	NA	0	1252	0.185	0.59	0.639	0.672	0.588	0.398	0.841	0	0.198	0.821	0.733	0.81	1343	0.76	0.99	0.54	0.215	0	As548_TRINITY_DN3953_c1_g1	0	NA	NA	NA	1369	3008	1.98	NA	NA	NA	NA	NA	NA	NA	NA	NA	NA
TRINITY_DN17193_c0_g1_i1	4216	2	NA	NA	NA	TRINITY_DN17193_c0_g1	4435	NA	NA	NA	NA	0	0.193	0.185	0	0	0.496	0	0	0.571	0	0	0.395	0.88	0.288	0.96	0.676	0.52	0	0	0.356	As548_TRINITY_DN6801_c0_g1	0	NA	NA	NA	1588	4565	7022	NA	NA	NA	NA	NA	NA	NA	NA	NA	NA
TRINITY_DN17280_c0_g1_i5	11329	2	NA	NA	NA	TRINITY_DN17280_c0_g1	11963	NA	NA	NA	jcf7180001861498	0	0.181	0.579	0.06	0.324	0.207	0.294	0	0.53	0.087	0	0.789	0.127	0	0.576	0	0.625	0	0	0	As548_TRINITY_DN39190_c0_g1	0	NA	NA	NA	0.569	0.765	0.797	NA	NA	NA	NA	NA	NA	NA	NA	NA	NA
TRINITY_DN1729_c1_g1_i3	2065	2	NA	NA	NA	TRINITY_DN1729_c1_g1	4553	NA	NA	NA	jcf7180001935122	0.786	0.843	2143	0.891	0.487	1664	0	0.389	1215	0.542	0.503	1024	1799	0.424	1919	2164	0.358	0.571	0.903	0.561	As548_TRINITY_DN35730_c0_g1	0	NA	NA	NA	1708	0.088	1.9	chr6B	148311817	92218	257	1.27e-96	361	chr6B	126604881	84184	196
TRINITY_DN1730_c0_g1_i15	1359	2	NA	NA	NA	TRINITY_DN1730_c0_g1	1876	NA	NA	NA	NA	1436	0	2606	2443	1.48	1984	1048	0	0.613	0.737	0.772	2709	0	1052	3.08	1425	0	5695	1548	0.933	As548_TRINITY_DN678_c0_g1	4.07e-161	NA	NA	NA	5374	3536	16262	chr6S	299661989	97561	41	9.75e-10	71.3	chr6S	128682184	100	34
TRINITY_DN17331_c0_g2_i11	3274	2	NBSLRR	581	3043	TRINITY_DN17331_c0_g2	3910	NBSLRR	581	3484	jcf7180001592290	0	0.494	0.683	0	0.781	1251	0	0	1267	0.152	0.233	1056	0.577	0.568	1449	0.198	0.176	0.642	0	0.182	As548_TRINITY_DN53184_c0_g1	4.03e-149	NA	NA	NA	0	2.63	0	chr6B	708066476	76923	858	8.1e-123	448	chr6B	708098283	76798	862
TRINITY_DN1733_c0_g1_i30	6684	2	NA	NA	NA	TRINITY_DN1733_c0_g1	10150	NA	NA	NA	jcf7180001895416	2154	2409	3985	0	3487	2491	0.695	2052	3074	1073	2316	3445	2063	2968	3733	3226	3175	2058	0.881	1526	As548_TRINITY_DN2418_c0_g1	0	NA	NA	NA	7272	12702	11175	chr6B	20684486	98597	2424	0	4289	chr6B	20680881	98671	2258
TRINITY_DN1733_c0_g1_i33	6343	2	NA	NA	NA	TRINITY_DN1733_c0_g1	10150	NA	NA	NA	jcf7180001895416	0.054	0.265	0.069	0	0	0.31	0.127	0	0.644	0	0.422	0	0	0	0.749	0.739	0.337	0.499	0.021	0	As548_TRINITY_DN2418_c0_g1	0	NA	NA	NA	7272	12702	11175	chr6B	20684486	98597	2424	0	4289	chr6B	20680881	98671	2258
TRINITY_DN1733_c0_g1_i38	9123	2	NA	NA	NA	TRINITY_DN1733_c0_g1	10150	NA	NA	NA	jcf7180001895416	1382	1843	2768	0.385	1358	2315	1234	2308	2389	0.575	2191	2538	1769	2226	3176	2216	2128	1.08	0.656	0.996	As548_TRINITY_DN2418_c0_g1	0	NA	NA	NA	7272	12702	11175	chr6B	20684486	98597	2424	0	4289	chr6B	20680881	98671	2258
TRINITY_DN173_c0_g1_i1	1223	2	NA	NA	NA	TRINITY_DN173_c0_g1	1822	NA	NA	NA	jcf7180001597846	4756	5841	13031	3033	4349	7844	3251	4528	7384	4522	8188	9.94	3.05	2945	13751	2674	1946	9.16	1838	4814	As548_TRINITY_DN91895_c0_g1	2.46e-133	NA	NA	NA	27152	54845	36314	NA	NA	NA	NA	NA	NA	NA	NA	NA	NA
TRINITY_DN17402_c0_g1_i10	1997	2	NA	NA	NA	TRINITY_DN17402_c0_g1	3317	NA	NA	NA	NA	0.135	0.542	0.035	0.325	0.537	0.579	0	0.557	0.467	0	0.126	0.779	0.645	0.939	0.691	0.416	0.885	0	0	0	As548_TRINITY_DN11584_c0_g1	0	NA	NA	NA	0.36	0.457	1218	NA	NA	NA	NA	NA	NA	NA	NA	NA	NA
TRINITY_DN17441_c0_g1_i1	288	2	NA	NA	NA	TRINITY_DN17441_c0_g1	288	NA	NA	NA	NA	0	2818	1.83	0	0	0	0	0	0	0	0	0	0	0	0	0	0	0	0	0	As548_TRINITY_DN22357_c1_g1	9.21e-21	NA	NA	NA	0.889	0	3721	NA	NA	NA	NA	NA	NA	NA	NA	NA	NA
TRINITY_DN17482_c0_g1_i4	730	2	NA	NA	NA	TRINITY_DN17482_c0_g1	1128	NA	NA	NA	jcf7180001894515	0.176	0.566	1042	0	0.385	0.734	0	0.186	1039	1486	0	0.907	0.655	0	1.18	0.52	0.457	0.998	0	0.427	As548_TRINITY_DN3392_c0_g1	3.55e-75	NA	NA	NA	10589	8902	6.68	chr6B	718992143	96632	386	0	640	chr6B	424467493	88701	177
TRINITY_DN17490_c0_g1_i2	4614	2	NA	NA	NA	TRINITY_DN17490_c0_g1	4883	NA	NA	NA	NA	0.19	0.181	0.29	0	0.253	0.475	0.353	0	0.27	0.26	0.251	0.395	0.782	0.318	0.47	0.645	0.267	0	0	0	As548_TRINITY_DN13643_c0_g1	0	NA	NA	NA	0.979	0.915	1821	NA	NA	NA	NA	NA	NA	NA	NA	NA	NA
TRINITY_DN1750_c0_g1_i8	1124	2	NA	NA	NA	TRINITY_DN1750_c0_g1	2950	NA	NA	NA	NA	0	2372	2768	1938	3619	1561	0	5333	2513	0.542	3098	3957	0.831	2945	4942	1051	1974	10749	1784	5708	As548_TRINITY_DN3957_c0_g1	8.94e-110	NA	NA	NA	1938	4935	2606	NA	NA	NA	NA	NA	NA	NA	NA	NA	NA
TRINITY_DN17788_c0_g1_i3	987	2	NA	NA	NA	TRINITY_DN17788_c0_g1	2409	NA	NA	NA	jcf7180001603662	0.501	1409	0.973	0	0.74	1395	0	0.345	0.353	0.737	0.745	2.25	0.802	1529	1084	0.864	0.176	0	0.14	0	As548_TRINITY_DN54070_c0_g1	0	NA	NA	NA	0.549	3668	3152	NA	NA	NA	NA	NA	NA	NA	NA	NA	NA
TRINITY_DN1779_c0_g1_i19	2344	2	NA	NA	NA	TRINITY_DN1779_c0_g1	2726	NA	NA	NA	NA	0.705	0.951	0.069	0.421	1379	0.258	0	0	0.54	0	0	0.075	0.371	1704	0.374	0.531	2304	0.163	0.516	2387	As548_TRINITY_DN1025_c0_g1	0	NA	NA	NA	2687	5146	1878	NA	NA	NA	NA	NA	NA	NA	NA	NA	NA
TRINITY_DN17884_c0_g1_i1	1331	2	NA	NA	NA	TRINITY_DN17884_c0_g1	2064	NA	NA	NA	NA	0.081	0.024	0.278	0	0	0.289	0	0	0.364	0	0.539	0.811	0.205	0	0.883	0	0.386	0.815	0	0	As548_TRINITY_DN8883_c0_g1	0	NA	NA	NA	1578	1513	3505	NA	NA	NA	NA	NA	NA	NA	NA	NA	NA
TRINITY_DN1789_c0_g1_i11	2490	2	NA	NA	NA	TRINITY_DN1789_c0_g1	3342	NA	NA	NA	jcf7180001575960	1829	9297	0.857	0	2808	1075	5073	10117	2461	1746	8628	1152	8866	11758	1718	4141	15059	1508	2.01	5.7	As548_TRINITY_DN2521_c0_g1	0	NA	NA	NA	8241	6105	2253	NA	NA	NA	NA	NA	NA	NA	NA	NA	NA
TRINITY_DN1792_c1_g1_i12	1635	2	NA	NA	NA	TRINITY_DN1792_c1_g1	2266	NA	NA	NA	NA	5217	0.903	6324	2744	2707	4785	3202	1017	6315	9.78	1221	8201	6197	2143	6.65	6347	1384	9272	4063	0.877	As548_TRINITY_DN2381_c0_g1	0	NA	NA	NA	14765	12764	22282	NA	NA	NA	NA	NA	NA	NA	NA	NA	NA
TRINITY_DN17_c0_g1_i4	2618	2	NA	NA	NA	TRINITY_DN17_c0_g1	3238	NA	NA	NA	NA	0.637	0.674	0	0	0	0	0	0	0.156	0	0.889	0	0	0	0	0.135	0	0	0	0	As548_TRINITY_DN587_c1_g1	0	NA	NA	NA	12047	14584	5371	NA	NA	NA	NA	NA	NA	NA	NA	NA	NA
TRINITY_DN1807_c1_g1_i5	791	2	NA	NA	NA	TRINITY_DN1807_c1_g1	1390	NA	NA	NA	NA	0.921	1999	3498	0	5464	1116	7.07	6571	2274	0	6518	0.896	1144	9866	2581	3236	5935	4442	4879	7036	As548_TRINITY_DN5427_c1_g1	1.15e-120	NA	NA	NA	0.32	7187	2094	NA	NA	NA	NA	NA	NA	NA	NA	NA	NA
TRINITY_DN18081_c0_g1_i30	1363	2	NA	NA	NA	TRINITY_DN18081_c0_g1	2700	NA	NA	NA	jcf7180001891510	0.135	0	0.811	0.758	0.628	0.579	1116	0.584	0.364	0.716	0.997	0.693	0.078	0	0.816	0.114	0.534	0.642	0.58	0	As548_TRINITY_DN850_c0_g2	2.12e-160	NA	NA	NA	4016	3343	2982	chr6B	712251921	93939	396	1.88e-167	595	chr6B	712252601	99194	124
TRINITY_DN18092_c0_g1_i4	1743	2	NA	NA	NA	TRINITY_DN18092_c0_g1	2194	NA	NA	NA	NA	0.285	0.434	0.452	0.578	0.112	1426	1263	0.61	1267	0.173	0.189	1301	0.499	0.704	1785	0.718	0.225	1131	0.043	0.119	As548_TRINITY_DN5838_c0_g1	0	NA	NA	NA	1129	1425	2435	NA	NA	NA	NA	NA	NA	NA	NA	NA	NA
TRINITY_DN180_c1_g1_i6	1442	2	NA	NA	NA	TRINITY_DN180_c1_g1	1846	NA	NA	NA	jcf7180001941859	1.91	4865	2.12	5.97	7633	1.53	6776	7517	2025	4.25	5791	1205	1.74	4308	2217	3434	5605	2934	0.183	11297	As548_TRINITY_DN67_c0_g2	1.23e-91	NA	NA	NA	16693	36092	11835	chr6S	35663524	92118	203	3.15e-74	285	chr6S	761234628	89163	203
TRINITY_DN180_c3_g1_i4	795	2	NA	NA	NA	TRINITY_DN180_c3_g1	1292	NA	NA	NA	jcf7180001741952	0.406	6.72	3788	2876	6265	5188	1616	10639	6231	1.16	5558	3498	3255	6625	5729	3069	6539	8406	1.29	6.19	As548_TRINITY_DN517_c1_g1	1.74e-133	NA	NA	NA	25563	26.75	6657	NA	NA	NA	NA	NA	NA	NA	NA	NA	NA
TRINITY_DN1812_c0_g1_i6	2114	2	NA	NA	NA	TRINITY_DN1812_c0_g1	3481	NA	NA	NA	NA	0	1337	1077	1384	0.801	0.486	0.304	0.195	0.945	0.445	1302	0.597	0.547	0.598	0.643	1103	1292	1172	0	0.711	As548_TRINITY_DN1362_c0_g1	0	NA	NA	NA	5384	4829	5371	NA	NA	NA	NA	NA	NA	NA	NA	NA	NA
TRINITY_DN18170_c0_g1_i1	1906	2	NA	NA	NA	TRINITY_DN18170_c0_g1	2465	NA	NA	NA	NA	4946	12609	8467	9231	22301	8175	9528	9127	6.46	6842	11106	12446	5415	11.63	12149	3891	6097	11218	1849	8.98	As548_TRINITY_DN954_c0_g1	0	NA	NA	NA	11488	15244	11665	NA	NA	NA	NA	NA	NA	NA	NA	NA	NA
TRINITY_DN18170_c0_g1_i2	2056	2	NA	NA	NA	TRINITY_DN18170_c0_g1	2465	NA	NA	NA	NA	0.447	1457	0	0	1987	0.041	0	0	0.197	0	1.93	0.043	0.411	0.379	0.192	0.114	0.288	0.693	0	0	As548_TRINITY_DN954_c0_g1	0	NA	NA	NA	11488	15244	11665	NA	NA	NA	NA	NA	NA	NA	NA	NA	NA
TRINITY_DN18170_c0_g1_i8	2058	2	NA	NA	NA	TRINITY_DN18170_c0_g1	2465	NA	NA	NA	NA	0.217	1012	0	0	0.041	0	0	0	0.01	0	0	0	0.127	0.038	0.106	0	0.014	0.346	0	0	As548_TRINITY_DN954_c0_g1	0	NA	NA	NA	11488	15244	11665	NA	NA	NA	NA	NA	NA	NA	NA	NA	NA
TRINITY_DN1824_c0_g1_i8	1350	2	NA	NA	NA	TRINITY_DN1824_c0_g1	2224	NA	NA	NA	jcf7180001890468	7412	12778	4205	2876	16604	3297	6639	24374	9129	7807	18559	7465	6002	21018	6631	4152	27779	8569	2719	22522	As548_TRINITY_DN90839_c0_g1	0	NA	NA	NA	9.44	25131	16558	chr6B	418721577	95556	90	6.73e-32	145	chr6B	418721514	96667	60
TRINITY_DN1825_c2_g1_i1	476	2	NA	NA	NA	TRINITY_DN1825_c2_g1	1008	NA	NA	NA	NA	0	0.819	0.568	1902	0.841	0	0	0.248	0	0	0	0	0	0	0	0	0.407	0	0	0	As548_TRINITY_DN5763_c0_g1	6.37e-122	NA	NA	NA	14205	37261	25253	NA	NA	NA	NA	NA	NA	NA	NA	NA	NA
TRINITY_DN18267_c0_g1_i4	2306	2	NA	NA	NA	TRINITY_DN18267_c0_g1	5811	NA	NA	NA	NA	0	0.265	0.29	0	0.395	0.331	0	0.283	0.727	0.629	0.171	0.384	0.254	0.598	0.317	0.78	0.218	0	0	0	As548_TRINITY_DN11299_c0_g1	0	NA	NA	NA	0.999	1311	1.73	NA	NA	NA	NA	NA	NA	NA	NA	NA	NA
TRINITY_DN183_c2_g1_i15	2387	2	NA	NA	NA	TRINITY_DN183_c2_g1	3040	NA	NA	NA	NA	0.122	0.181	0	0	1358	0	1293	0	0	0	0	0	0.039	0.28	0	0.25	0	0	0.365	0	As548_TRINITY_DN739_c0_g5	0	NA	NA	NA	8052	45917	13121	NA	NA	NA	NA	NA	NA	NA	NA	NA	NA
TRINITY_DN183_c3_g1_i11	2352	2	NA	NA	NA	TRINITY_DN183_c3_g1	2955	NA	NA	NA	jcf7180001902299	0	0.361	0.417	0.12	0	0.052	0	0	1101	0	0	0.107	0	0	0.269	0	0	0	0	0	As548_TRINITY_DN517_c1_g1	0	NA	NA	NA	25563	26.75	6657	NA	NA	NA	NA	NA	NA	NA	NA	NA	NA
TRINITY_DN1840_c1_g1_i1	3498	2	NA	NA	NA	TRINITY_DN1840_c1_g1	4260	NA	NA	NA	jcf7180001542867	0.271	0.638	0.788	0.241	0	0.62	0	0.354	0.53	0	0.171	0.341	0.147	0	0.288	0.437	0.316	0.907	0	0	As548_TRINITY_DN2789_c0_g1	0	NA	NA	NA	2437	2665	7807	chr6B	107358229	97436	39	2.89e-08	67.6	NA	NA	NA	NA
TRINITY_DN1840_c1_g1_i4	3238	2	NA	NA	NA	TRINITY_DN1840_c1_g1	4260	NA	NA	NA	jcf7180001542867	0	0	1008	0.181	0	1375	0.744	0.009	0.343	0	0.557	1.61	0.508	1121	0.873	0.812	0.52	0.56	0.15	0	As548_TRINITY_DN2789_c0_g1	0	NA	NA	NA	2437	2665	7807	chr6B	107358229	97436	39	2.89e-08	67.6	NA	NA	NA	NA
TRINITY_DN1840_c1_g1_i6	3033	2	NA	NA	NA	TRINITY_DN1840_c1_g1	4260	NA	NA	NA	jcf7180001542867	0	0.638	0.382	0	0.466	0.641	0	0	1059	0.802	0	0	0.626	0.447	1017	0	0.716	0	0	0	As548_TRINITY_DN2789_c0_g1	0	NA	NA	NA	2437	2665	7807	chr6B	107358229	97436	39	2.89e-08	67.6	NA	NA	NA	NA
TRINITY_DN18430_c0_g1_i3	3180	2	NA	NA	NA	TRINITY_DN18430_c0_g1	3284	NA	NA	NA	jcf7180001876929	0.65	0.614	1228	0.156	0.375	1488	2047	0	1153	0.846	1086	1749	1789	1325	1535	1301	0.969	0.346	0.054	0.411	As548_TRINITY_DN18116_c0_g2	0	NA	NA	NA	0.44	0.334	2754	NA	NA	NA	NA	NA	NA	NA	NA	NA	NA
TRINITY_DN1849_c0_g1_i1	1082	2	NA	NA	NA	TRINITY_DN1849_c0_g1	1991	NA	NA	NA	NA	0	2083	1552	0	1926	0.734	2.34	0.531	2004	0	2765	1546	1339	3384	1679	2456	1384	1.1	0	1447	As548_TRINITY_DN1123_c4_g3	0	NA	NA	NA	4755	7653	4996	NA	NA	NA	NA	NA	NA	NA	NA	NA	NA
TRINITY_DN18513_c0_g1_i3	308	2	NA	NA	NA	TRINITY_DN18513_c0_g1	470	NA	NA	NA	jcf7180001525013	0	4504	3405	0	0	0	0	6704	0	0	0	0	0	6898	0.94	1623	0	0	0	0	As548_TRINITY_DN2979_c0_g3	3.08e-77	NA	NA	NA	0	0.264	0.751	chr6B	262847483	94624	186	5.91e-76	289	chr6B	643423869	93258	178
TRINITY_DN18531_c0_g1_i1	773	2	NA	NA	NA	TRINITY_DN18531_c0_g1	773	NA	NA	NA	NA	0	0.855	0.66	0	0.405	0.837	0	0.884	1693	0	0.341	0.64	0.254	0.674	0.211	0.988	0.759	1.1	0	0.617	As548_TRINITY_DN39365_c0_g1	9.41e-15	NA	NA	NA	1059	0.097	0.785	chr6B	704334659	94309	246	7.43e-102	375	chr6B	704335088	88636	88
TRINITY_DN185_c1_g1_i7	1580	2	NA	NA	NA	TRINITY_DN185_c1_g1	2472	NA	NA	NA	NA	0	4095	0.961	0	3791	0.579	1968	6491	1766	2.83	4992	0.459	0.411	3536	0.48	0.51	4818	0.632	0	10.53	As548_TRINITY_DN1265_c0_g3	4.37e-127	NA	NA	NA	1938	17399	2674	NA	NA	NA	NA	NA	NA	NA	NA	NA	NA
TRINITY_DN18662_c0_g2_i2	1730	2	NA	NA	NA	TRINITY_DN18662_c0_g2	2794	NA	NA	NA	NA	0.339	0.325	0.463	0	0	0.713	0.685	0	0.841	0.314	0.018	0.491	0	0.068	0.202	0	0.063	0	0.064	0	As548_TRINITY_DN39990_c0_g4	1.1e-103	NA	NA	NA	0	0	3334	chr6B	621979814	100	47	1.45e-14	87.9	NA	NA	NA	NA
TRINITY_DN1867_c0_g1_i10	3453	2	NA	NA	NA	TRINITY_DN1867_c0_g1	5698	NA	NA	NA	NA	7019	10766	6753	5717	7441	8371	11085	13328	5401	8154	14.42	7.7	13402	15696	6976	14858	18859	2343	1096	3968	As548_TRINITY_DN638_c0_g2	0	NA	NA	NA	20858	17346	21748	NA	NA	NA	NA	NA	NA	NA	NA	NA	NA
TRINITY_DN1867_c0_g1_i3	811	2	NA	NA	NA	TRINITY_DN1867_c0_g1	5698	NA	NA	NA	NA	0.528	2662	0.359	0.325	2311	0.424	5993	2423	0.987	0	2613	0.96	0.557	0	0.787	1301	0.506	1172	3439	0	As548_TRINITY_DN638_c0_g2	0	NA	NA	NA	20858	17346	21748	NA	NA	NA	NA	NA	NA	NA	NA	NA	NA
TRINITY_DN186_c0_g1_i21	1701	2	NA	NA	NA	TRINITY_DN186_c0_g1	7698	NA	NA	NA	jcf7180001553941	1138	0.903	4228	0	2717	0.951	0	2998	1558	1117	0	0.523	0	1991	8733	0	0.056	3454	0	0.64	As548_TRINITY_DN4033_c0_g2	0	NA	NA	NA	2328	5.41	1.4	NA	NA	NA	NA	NA	NA	NA	NA	NA	NA
TRINITY_DN1887_c0_g1_i11	1827	2	NA	NA	NA	TRINITY_DN1887_c0_g1	2494	NA	NA	NA	NA	0.65	2842	0.498	0	0.953	0.165	0	3573	0.249	0	1553	0.384	1789	2779	0.816	1675	2936	0	0	2.83	As548_TRINITY_DN18983_c1_g1	0	NA	NA	NA	9.22	22237	6566	NA	NA	NA	NA	NA	NA	NA	NA	NA	NA
TRINITY_DN18903_c0_g1_i4	2085	2	NA	NA	NA	TRINITY_DN18903_c0_g1	2453	NA	NA	NA	NA	0.163	0.096	0.475	0	0.487	0.145	0	0.274	0.083	0.607	0	0.267	0.293	0.84	0.432	0.489	0.253	0	0.118	0	As548_TRINITY_DN11751_c3_g1	0	NA	NA	NA	2957	2657	4268	NA	NA	NA	NA	NA	NA	NA	NA	NA	NA
TRINITY_DN1896_c0_g1_i11	5917	2	NA	NA	NA	TRINITY_DN1896_c0_g1	7003	NA	NA	NA	jcf7180001890734	1626	1445	2791	0.915	1602	3007	1.41	1105	2.42	0.434	1329	3967	1799	2688	3829	1748	3196	2211	0.946	1091	As548_TRINITY_DN6433_c0_g1	0	NA	NA	NA	4006	5858	4973	chr6B	717863224	99.39	492	0	893	chr6B	717870050	99407	337
TRINITY_DN18988_c0_g1_i7	2133	2	NA	NA	NA	TRINITY_DN18988_c0_g1	2509	NA	NA	NA	jcf7180001913150	0.041	0	0.475	0	0.03	0.424	0	0.168	0.125	0.087	0	0	0.479	0	0.47	0.427	0.056	0.825	0.032	0	As548_TRINITY_DN1385_c2_g2	0	NA	NA	NA	1448	0.836	2287	chr6S	789656144	96.29	593	0	974	chr6S	789656737	96718	518
TRINITY_DN18997_c0_g1_i2	2651	2	NA	NA	NA	TRINITY_DN18997_c0_g1	2651	NA	NA	NA	NA	0	0.157	0.591	0	0.527	0.878	0.979	0.053	0.685	0	0.144	0.459	0.479	0	0.643	0.343	0.288	0.815	0	1004	As548_TRINITY_DN13673_c0_g1	0	NA	NA	NA	2348	1777	1229	NA	NA	NA	NA	NA	NA	NA	NA	NA	NA
TRINITY_DN1906_c0_g1_i2	3932	2	NA	NA	NA	TRINITY_DN1906_c0_g1	5117	NA	NA	NA	NA	1341	2083	0.764	0.229	0.902	0.62	0.94	1503	1558	2407	1814	1024	1398	1953	1075	1498	2212	0.448	0.591	1289	As548_TRINITY_DN7821_c0_g1	0	NA	NA	NA	9.74	12236	4768	NA	NA	NA	NA	NA	NA	NA	NA	NA	NA
TRINITY_DN1907_c1_g1_i6	3005	2	NA	NA	NA	TRINITY_DN1907_c1_g1	5303	NA	NA	NA	jcf7180001611163	1761	5034	2421	0.505	3051	2604	1361	4342	3947	0.954	3969	2847	2512	4641	3128	2861	7073	1579	0.731	3431	As548_TRINITY_DN1055_c0_g1	0	NA	NA	NA	14095	7002	6908	chr6S	682360161	98248	628	0	1098	chr6S	682358557	98857	175
TRINITY_DN1916_c2_g1_i85	4863	2	NA	NA	NA	TRINITY_DN1916_c2_g1	6698	NA	NA	NA	jcf7180001941479	0	0.578	0	0	0.679	0.155	0	0	0.114	0.889	0	0.352	0.078	0	0.192	0	0.042	0	0	0	As548_TRINITY_DN25343_c0_g2	0	NA	NA	NA	0.959	2217	0.706	chr6B	612633263	93734	766	0	1149	chr6B	170868340	89313	262
TRINITY_DN191_c0_g1_i5	1441	2	NA	NA	NA	TRINITY_DN191_c0_g1	1825	NA	NA	NA	jcf7180001568844	25.69	7659	35.34	46168	13989	62619	20985	10188	55097	40553	8557	50615	25455	7708	51119	27698	8653	18401	25343	14538	As548_TRINITY_DN75_c0_g1	0	NA	NA	NA	68089	57731	121666	chr6B	317213372	90323	93	9.28e-25	121	chr6B	317212132	89247	93
TRINITY_DN19260_c0_g1_i5	774	2	NA	NA	NA	TRINITY_DN19260_c0_g1	1494	NA	NA	NA	jcf7180001724034	0.745	1301	0.695	1167	1.47	1612	3143	0	0.685	0	1787	0.97	0.958	0	0.883	1415	0.681	0.112	0	2087	As548_TRINITY_DN7564_c0_g1	3.7e-66	NA	NA	NA	0.23	2225	2094	NA	NA	NA	NA	NA	NA	NA	NA	NA	NA
TRINITY_DN1927_c0_g3_i2	525	2	NA	NA	NA	TRINITY_DN1927_c0_g3	795	NA	NA	NA	jcf7180001550374	0.732	1529	0.985	0	2484	3731	0	2.22	0.914	0.401	1724	1493	0.723	3869	3071	1072	0.829	4198	0	0	As548_TRINITY_DN4070_c0_g3	8.96e-70	NA	NA	NA	1498	1152	0.387	chr6S	649633392	98165	109	2.98e-46	191	chr6S	708271582	98165	109
TRINITY_DN19332_c0_g1_i5	900	2	NA	NA	NA	TRINITY_DN19332_c0_g1	1938	NA	NA	NA	jcf7180001891499	0	0	0.764	0.903	2311	2305	0.695	0.884	3864	2516	0.314	3093	2209	0.098	3685	2216	0.021	0.632	2225	2229	As548_TRINITY_DN73522_c0_g1	7.67e-99	NA	NA	NA	5274	0.369	6635	chr6S	787605820	97561	205	1.16e-93	350	chr6S	787605912	96	150
TRINITY_DN1933_c0_g1_i5	1017	2	NA	NA	NA	TRINITY_DN1933_c0_g1	2221	NA	NA	NA	NA	0	2047	1054	0.975	0	0.527	0	0	0	0	0.476	0	0	0.734	4558	0.687	0	1192	0	1328	As548_TRINITY_DN73112_c0_g1	0	NA	NA	NA	0.16	10652	3812	NA	NA	NA	NA	NA	NA	NA	NA	NA	NA
TRINITY_DN1933_c0_g1_i8	1272	2	NA	NA	NA	TRINITY_DN1933_c0_g1	2221	NA	NA	NA	NA	0	0	0.29	0	0	0.103	0	0	0	0	0	0	0	0.787	0.01	0	0.92	0	0.355	1312	As548_TRINITY_DN73112_c0_g1	0	NA	NA	NA	0.16	10652	3812	NA	NA	NA	NA	NA	NA	NA	NA	NA	NA
TRINITY_DN1933_c0_g1_i9	1251	2	NA	NA	NA	TRINITY_DN1933_c0_g1	2221	NA	NA	NA	NA	0	1216	3869	0	6619	2294	6.61	3352	5.92	2429	4301	5.77	1339	3.99	6948	0.229	2704	1793	4482	3739	As548_TRINITY_DN73112_c0_g1	0	NA	NA	NA	0.16	10652	3812	NA	NA	NA	NA	NA	NA	NA	NA	NA	NA
TRINITY_DN19342_c0_g1_i6	769	2	NA	NA	NA	TRINITY_DN19342_c0_g1	1128	NA	NA	NA	NA	0	0.843	0.116	0	0.588	0	0.842	0.212	0.301	0	0	0	0	0	0	0	0.112	0	0.333	0	As548_TRINITY_DN6676_c0_g1	1.47e-153	NA	NA	NA	1009	0	0.66	NA	NA	NA	NA	NA	NA	NA	NA	NA	NA
TRINITY_DN19364_c0_g1_i1	3320	2	NA	NA	NA	TRINITY_DN19364_c0_g1	3573	NA	NA	NA	jcf7180001925153	0.027	0.494	0.927	0	0.101	1571	0	0.097	1215	0.282	0	1589	0.587	0.273	1084	0.999	0.379	0	0.322	0.174	As548_TRINITY_DN6068_c0_g1	0	NA	NA	NA	3966	1196	4211	chr6S	157953437	100	147	4.78e-70	272	chr6S	157953294	81212	165
TRINITY_DN19378_c0_g1_i1	3253	2	NA	NA	NA	TRINITY_DN19378_c0_g1	3253	NA	NA	NA	NA	0.271	0.253	0.903	0.265	0.365	0.961	0.45	0.292	0.789	0.282	0.431	0.768	0.665	0.386	1046	0.468	0.358	0.143	0.107	0.15	As548_TRINITY_DN13964_c0_g1	0	NA	NA	NA	0.659	0	0.728	NA	NA	NA	NA	NA	NA	NA	NA	NA	NA
TRINITY_DN19541_c0_g1_i8	2607	2	NA	NA	NA	TRINITY_DN19541_c0_g1	2886	NA	NA	NA	NA	0	0	0.637	0	0	0	0	0	0	0	0	0	0	0	1507	0	0	0	0	0	As548_TRINITY_DN12220_c0_g1	0	NA	NA	NA	1888	1.17	1969	NA	NA	NA	NA	NA	NA	NA	NA	NA	NA
TRINITY_DN1958_c0_g1_i7	1649	2	NA	NA	NA	TRINITY_DN1958_c0_g1	2757	NA	NA	NA	NA	0.976	0.373	2351	0	0	2336	0	0.407	1901	1171	0	1984	0.156	0	2524	0.291	0.246	0.723	0.258	0	As548_TRINITY_DN6624_c0_g2	0	NA	NA	NA	8421	5146	15773	NA	NA	NA	NA	NA	NA	NA	NA	NA	NA
TRINITY_DN1963_c0_g1_i12	1124	2	NA	NA	NA	TRINITY_DN1963_c0_g1	5351	NA	NA	NA	jcf7180001771952	2778	4817	4981	17319	11536	0	12848	0.991	5754	0.824	0.198	0	3001	8.26	0	13412	2929	5665	19.69	3874	As548_TRINITY_DN521_c0_g2	0	NA	NA	NA	1748	27911	4438	NA	NA	NA	NA	NA	NA	NA	NA	NA	NA
TRINITY_DN19773_c0_g2_i2	3834	2	NA	NA	NA	TRINITY_DN19773_c0_g2	5795	NA	NA	NA	jcf7180001585855	0.379	0.458	0.394	0.168	0.051	0.103	0.529	0.478	0.021	0.098	0.198	0.213	0.469	0.447	0.365	0.302	1075	0	0.054	0.253	As548_TRINITY_DN37937_c0_g1	0	NA	NA	NA	0.739	0.238	0.603	NA	NA	NA	NA	NA	NA	NA	NA	NA	NA
TRINITY_DN19777_c0_g1_i3	3122	2	NA	NA	NA	TRINITY_DN19777_c0_g1	3394	NA	NA	NA	jcf7180001520801	0.813	1192	1598	0	0.801	1778	1107	0.893	2233	0	1481	1877	2.6	2589	1535	3059	2044	0.092	0.043	0.664	As548_TRINITY_DN29696_c0_g1	2.24e-101	NA	NA	NA	0	0.211	1001	chr6S	307801029	83819	618	5.17e-159	568	chr6S	792701850	87216	485
TRINITY_DN1980_c1_g1_i6	926	2	NA	NA	NA	TRINITY_DN1980_c1_g1	2616	NA	NA	NA	jcf7180001701201	0.745	1481	0.139	3767	1521	0	0	4024	0.883	1193	1472	0.309	1339	1.81	0.499	0.333	1791	1284	1043	1478	As548_TRINITY_DN1966_c0_g1	1.06e-83	NA	NA	NA	43185	62437	17958	chr6B	548443100	92308	169	4.57e-59	235	chr6B	548449922	92727	165
TRINITY_DN19823_c0_g1_i3	1798	2	NA	NA	NA	TRINITY_DN19823_c0_g1	2086	NA	NA	NA	NA	0.135	0.313	0.232	0	0	0.703	0	0	1246	0.618	0	0.864	0.362	0.485	0.998	0.271	0.042	0.418	0	0	As548_TRINITY_DN18121_c0_g1	0	NA	NA	NA	2517	2138	3.63	NA	NA	NA	NA	NA	NA	NA	NA	NA	NA
TRINITY_DN19832_c0_g1_i7	1528	2	NA	NA	NA	TRINITY_DN19832_c0_g1	2838	NA	NA	NA	NA	0.325	0.494	1147	0.758	1044	1602	1283	0	2513	1052	1015	2048	2082	0.977	1593	1.79	0.534	1375	0.29	0	As548_TRINITY_DN3248_c0_g1	0	NA	NA	NA	9.34	5163	7659	NA	NA	NA	NA	NA	NA	NA	NA	NA	NA
TRINITY_DN1983_c0_g1_i4	2452	2	NA	NA	NA	TRINITY_DN1983_c0_g1	3823	NA	NA	NA	NA	0	0.253	0	0	0.689	0.134	0	0.274	0.197	0.878	0.494	0.107	0.147	0	0.067	0.177	0.337	0	0	0	As548_TRINITY_DN3885_c0_g1	0	NA	NA	NA	77599	37358	32126	NA	NA	NA	NA	NA	NA	NA	NA	NA	NA
TRINITY_DN19846_c0_g1_i6	2635	2	NA	NA	NA	TRINITY_DN19846_c0_g1	3817	NA	NA	NA	jcf7180001544203	0	0	0.544	0.241	0	0.971	0	0	0.831	0	0	0.565	0	0	0	0.062	0	0	0	0	As548_TRINITY_DN836_c0_g1	0	NA	NA	NA	4805	3167	6.35	chr6S	701501542	95332	407	5.65e-179	634	chr6S	701500533	95802	262
TRINITY_DN1988_c0_g1_i3	3366	2	NA	NA	NA	TRINITY_DN1988_c0_g1	4548	NA	NA	NA	jcf7180001627157	1423	3468	0.892	0.181	1.47	0.434	0.558	3051	0.872	0.9	3169	0.747	1584	2552	1641	2705	2248	0.632	1902	1787	As548_TRINITY_DN3562_c0_g1	5.98e-158	NA	NA	NA	14145	12614	8376	NA	NA	NA	NA	NA	NA	NA	NA	NA	NA
TRINITY_DN198_c1_g1_i3	269	2	NA	NA	NA	TRINITY_DN198_c1_g1	4159	NBSLRR	2321	4021	NA	0	0	7367	0	7218	7917	0	11515	7987	0	5899	7796	7.37	0	1526	7689	4221	0	0	18451	As548_TRINITY_DN8710_c0_g2	0	NBSLRR	829	2640	0.579	0.29	1889	chr6B	715976769	91205	614	0	822	chr6B	715975966	95143	453
TRINITY_DN1990_c0_g1_i6	884	2	NA	NA	NA	TRINITY_DN1990_c0_g1	1319	NA	NA	NA	NA	1233	1758	0.602	2347	1145	1416	1391	0.752	2482	4565	1472	1696	1535	1582	1535	1259	0.218	1162	0	2237	As548_TRINITY_DN1670_c1_g1	6.49e-123	NA	NA	NA	40378	45917	42573	chr6S	566507107	93478	46	2.45e-09	69.4	NA	NA	NA	NA
TRINITY_DN19954_c0_g1_i7	1201	2	NA	NA	NA	TRINITY_DN19954_c0_g1	1463	NA	NA	NA	NA	0.095	0.939	0	0	0	0.899	0	0.027	0	0	0	0	0	0.379	0	0	0	0	0	0	As548_TRINITY_DN4279_c0_g1	0	NA	NA	NA	2817	1381	3482	NA	NA	NA	NA	NA	NA	NA	NA	NA	NA
TRINITY_DN1999_c0_g1_i19	1920	2	NA	NA	NA	TRINITY_DN1999_c0_g1	2486	NA	NA	NA	jcf7180001936585	1.91	2.89	1135	1192	1612	1333	0.656	2123	1745	2928	2065	1674	4066	1863	1593	2924	2325	1.6	1752	1233	As548_TRINITY_DN4518_c0_g1	0	NA	NA	NA	14055	24128	15568	chr6S	740432114	93.98	598	0	885	chr6S	740431333	94458	397
TRINITY_DN2000_c0_g1_i13	2292	2	NA	NA	NA	TRINITY_DN2000_c0_g1	3171	NA	NA	NA	NA	0	0	0.579	0	0	1085	0	0	0.592	0	0	0.832	0.802	0	0.892	0.385	0.576	0	0	0	As548_TRINITY_DN1690_c0_g1	0	NA	NA	NA	15933	17522	12325	NA	NA	NA	NA	NA	NA	NA	NA	NA	NA
TRINITY_DN2002_c0_g1_i26	5155	2	NA	NA	NA	TRINITY_DN2002_c0_g1	6323	NA	NA	NA	jcf7180001708401	0	0.434	0.116	0	1977	0	0	0	0	1735	3394	1418	0	0	0	4505	0	0.785	0.183	0	As548_TRINITY_DN3358_c0_g1	0	NA	NA	NA	37.83	18991	7511	NA	NA	NA	NA	NA	NA	NA	NA	NA	NA
TRINITY_DN2002_c0_g1_i7	1889	2	NA	NA	NA	TRINITY_DN2002_c0_g1	6323	NA	NA	NA	jcf7180001555075	0	0	0.429	1047	1216	0	0	3051	0	0	0	0	0	1355	0	0	3982	0	4267	1273	As548_TRINITY_DN3358_c0_g1	0	NA	NA	NA	37.83	18991	7511	NA	NA	NA	NA	NA	NA	NA	NA	NA	NA
TRINITY_DN2007_c0_g1_i1	1002	2	NA	NA	NA	TRINITY_DN2007_c0_g1	6233	NA	NA	NA	NA	3767	5046	2027	2.01	7745	2398	10684	9737	2835	7666	7587	2432	6.1	4399	2034	3673	4973	1325	5847	10261	As548_TRINITY_DN43097_c0_g3	1.46e-110	NA	NA	NA	1119	0.704	0.535	chr6S	29789832	84.3	586	1.23e-157	564	chr6S	710982474	93458	321
TRINITY_DN20092_c0_g1_i2	997	2	NA	NA	NA	TRINITY_DN20092_c0_g1	1331	NA	NA	NA	NA	2615	2722	2618	0	9965	0.568	2781	19111	4279	0	15632	2208	3118	10259	4194	1748	9384	5899	2859	12324	As548_TRINITY_DN20927_c0_g1	6.59e-118	NA	NA	NA	0	2287	0.171	NA	NA	NA	NA	NA	NA	NA	NA	NA	NA
TRINITY_DN2012_c0_g1_i8	1560	2	NA	NA	NA	TRINITY_DN2012_c0_g1	2445	NA	NA	NA	NA	0	0.65	0	0	0	0	0.049	0	0.156	0	0	0.053	0	0.848	0	0.104	0	0	0.871	1455	As548_TRINITY_DN2110_c0_g2	0	NA	NA	NA	8921	10.45	11596	NA	NA	NA	NA	NA	NA	NA	NA	NA	NA
TRINITY_DN20204_c0_g1_i2	632	2	NA	NA	NA	TRINITY_DN20204_c0_g1	1198	NA	NA	NA	NA	0	0.566	1239	0.722	1085	0.444	0	0	0.685	0	0.045	0.661	0	0.167	0.912	0.166	0.815	0	0	0	As548_TRINITY_DN4498_c0_g2	1.32e-94	NA	NA	NA	0	9148	16865	NA	NA	NA	NA	NA	NA	NA	NA	NA	NA
TRINITY_DN20217_c0_g1_i2	2474	2	NA	NA	NA	TRINITY_DN20217_c0_g1	2805	NA	NA	NA	NA	0	0.879	1263	0.578	0.304	0.713	0.803	0.929	1.07	0	0	0.928	0.694	1719	0.854	0.77	0.625	1437	0	0.743	As548_TRINITY_DN9617_c1_g2	0	NA	NA	NA	2058	1355	1.4	NA	NA	NA	NA	NA	NA	NA	NA	NA	NA
TRINITY_DN20234_c0_g1_i1	950	2	NA	NA	NA	TRINITY_DN20234_c0_g1	1635	NA	NA	NA	jcf7180001658488	0	0.494	0.429	0	1034	0.682	0	0.761	0.364	0	0.691	0.437	0.166	0.78	0.873	0.239	1517	0.214	0	0	As548_TRINITY_DN3813_c0_g1	1.06e-111	NA	NA	NA	0.999	3	2515	chr6S	782050366	93443	183	7.79e-70	270	chr6S	782050292	87407	135
TRINITY_DN2029_c0_g1_i17	1468	2	NA	NA	NA	TRINITY_DN2029_c0_g1	3013	NA	NA	NA	NA	0	1614	13459	0	1186	6656	0	0.531	9223	0.792	2343	8766	0.332	2044	17.36	0.77	2121	16017	0.29	2119	As548_TRINITY_DN1192_c0_g2	5.3e-132	NA	NA	NA	19.11	42231	167756	chr6S	94099686	93443	61	4.35e-15	89.8	chr6S	94100830	93443	61
TRINITY_DN2031_c2_g1_i17	1908	2	NA	NA	NA	TRINITY_DN2031_c2_g1	2483	NA	NA	NA	NA	0	0.53	0.799	0	0	1158	0	0	0.291	0	0	0.341	0.411	0	0.403	0.104	0	0	0	0	As548_TRINITY_DN273_c0_g2	0	NA	NA	NA	4795	2894	5132	NA	NA	NA	NA	NA	NA	NA	NA	NA	NA
TRINITY_DN20357_c0_g1_i28	1603	2	NA	NA	NA	TRINITY_DN20357_c0_g1	2236	NA	NA	NA	NA	0	0.807	0.278	0	0.72	0.734	0	0	0.415	0	0	0.405	0.459	0.538	0.758	0.25	1.77	0	0	0	As548_TRINITY_DN3205_c0_g1	3.81e-152	NA	NA	NA	0.539	3686	4791	NA	NA	NA	NA	NA	NA	NA	NA	NA	NA
TRINITY_DN20400_c0_g1_i8	3358	2	NA	NA	NA	TRINITY_DN20400_c0_g1	3766	NA	NA	NA	NA	0	0	0.695	0	0.456	0.413	0	0.301	0.966	0	0	1162	0.371	0.856	1152	0.853	0.407	0	0	0	As548_TRINITY_DN5930_c0_g1	0	NA	NA	NA	1129	1223	1445	NA	NA	NA	NA	NA	NA	NA	NA	NA	NA
TRINITY_DN20432_c0_g1_i5	2041	2	NA	NA	NA	TRINITY_DN20432_c0_g1	2519	NA	NA	NA	NA	0	0.108	0.498	0.024	0	0.3	0	0	0.675	0	0.377	0.693	0.489	0	0.576	0.302	0	0.295	0	0	As548_TRINITY_DN39417_c0_g1	0	NA	NA	NA	0.729	0.413	1627	NA	NA	NA	NA	NA	NA	NA	NA	NA	NA
TRINITY_DN20456_c0_g1_i4	792	2	NA	NA	NA	TRINITY_DN20456_c0_g1	1424	NA	NA	NA	NA	0	5299	1181	0.481	0.507	0.93	1684	2715	0.644	2039	2272	1034	1095	0.803	2.15	2.32	3561	2598	0	2625	As548_TRINITY_DN13258_c0_g1	9.6e-82	NA	NA	NA	0	0.598	0	NA	NA	NA	NA	NA	NA	NA	NA	NA	NA
TRINITY_DN2047_c0_g1_i8	1310	2	NA	NA	NA	TRINITY_DN2047_c0_g1	1937	NA	NA	NA	jcf7180001523185	0	0	1471	0.987	0	1633	0	0.893	0.665	1692	3035	1152	1672	1.09	0.432	0	0.899	1406	1483	0	As548_TRINITY_DN3057_c0_g2	0	NA	NA	NA	2597	4944	7465	chr6B	590671575	98239	284	3.9e-138	497	chr6B	590673676	98765	243
TRINITY_DN2050_c0_g1_i10	1452	2	NA	NA	NA	TRINITY_DN2050_c0_g1	2888	NA	NA	NA	jcf7180001586468	0	0	0.88	0	0	0.672	0	0	0	0	0	0.256	0	0	0.48	0.676	0.379	0	0	0	As548_TRINITY_DN883_c1_g1	0	NA	NA	NA	7932	19.95	11608	NA	NA	NA	NA	NA	NA	NA	NA	NA	NA
TRINITY_DN2057_c0_g1_i6	1459	2	NA	NA	NA	TRINITY_DN2057_c0_g1	2173	NA	NA	NA	NA	20907	11983	29293	20135	13229	58082	9773	13195	38.22	14356	13306	38926	25112	17755	33.99	32318	9925	21131	30771	13067	As548_TRINITY_DN7679_c0_g2	0	NA	NA	NA	113911	47342	120038	NA	NA	NA	NA	NA	NA	NA	NA	NA	NA
TRINITY_DN2067_c1_g1_i3	8592	2	NA	NA	NA	TRINITY_DN2067_c1_g1	8944	NA	NA	NA	NA	0.285	0.674	1378	0.205	0.213	0.961	0	0.23	0.955	0.401	1122	1066	0.841	0.81	1132	0.978	1271	0	0.129	0.64	As548_TRINITY_DN2575_c0_g3	0	NA	NA	NA	2867	3897	5087	NA	NA	NA	NA	NA	NA	NA	NA	NA	NA
TRINITY_DN2067_c1_g1_i5	8127	2	NA	NA	NA	TRINITY_DN2067_c1_g1	8944	NA	NA	NA	NA	0.501	0.674	1158	0.12	0.821	1323	0	0.513	1319	0.336	0.126	1.13	1114	1015	1.19	1041	0.976	0	0	0	As548_TRINITY_DN2575_c0_g3	0	NA	NA	NA	2867	3897	5087	NA	NA	NA	NA	NA	NA	NA	NA	NA	NA
TRINITY_DN206_c0_g1_i22	2340	2	NA	NA	NA	TRINITY_DN206_c0_g1	3515	NA	NA	NA	NA	0	0.988	0	0	0.294	0	0	0.849	0	0	1.05	0.203	0.127	0.008	0	0	0.864	0.326	0	0.498	As548_TRINITY_DN15805_c0_g1	0	NA	NA	NA	67.28	125876	32297	chr6B	502484242	84211	95	3.93e-16	93.5	NA	NA	NA	NA
TRINITY_DN20768_c0_g1_i1	790	2	NA	NA	NA	TRINITY_DN20768_c0_g1	894	NA	NA	NA	NA	0	0	0.185	0	0.953	0.527	0	0	0	0	0.027	0.352	0.518	0.295	0.691	0.156	0.442	0	1376	0	As548_TRINITY_DN7753_c1_g2	1.24e-108	NA	NA	NA	0.559	0	0.728	NA	NA	NA	NA	NA	NA	NA	NA	NA	NA
TRINITY_DN20998_c1_g1_i3	424	2	NA	NA	NA	TRINITY_DN20998_c1_g1	1969	NA	NA	NA	jcf7180001605733	0	0	0.382	0	0	0.103	0	0	0	0	0	0	0	0	0.384	0	0	0	0	0	As548_TRINITY_DN4958_c0_g1	2.08e-129	NA	NA	NA	13865	9192	9081	NA	NA	NA	NA	NA	NA	NA	NA	NA	NA
TRINITY_DN21044_c1_g2_i6	2143	2	NA	NA	NA	TRINITY_DN21044_c1_g2	3197	NA	NA	NA	NA	0	0	0.197	0	0.081	0.486	0.676	0.628	0.353	0	0.215	0.341	0.215	0.485	0.393	0.031	0.211	0.52	0	0	As548_TRINITY_DN17935_c0_g2	1.29e-88	NA	NA	NA	0.919	0.264	0	NA	NA	NA	NA	NA	NA	NA	NA	NA	NA
TRINITY_DN21050_c0_g3_i2	3445	2	NBSLRR	163	2460	TRINITY_DN21050_c0_g3	3445	NBSLRR	163	2460	jcf7180001523190	0.122	0	0.452	0	0	0	0	0	0.052	0	0	0.096	0	0	0.278	0.447	0	0	0	0	As548_TRINITY_DN10906_c1_g2	1.41e-78	NBSLRR	104	364	0.569	0	1058	chr6B	696356647	100	1774	0	3277	chr6B	696302743	82154	1541
TRINITY_DN21050_c0_g3_i3	3347	2	NBSLRR	163	2460	TRINITY_DN21050_c0_g3	3445	NBSLRR	163	2460	jcf7180001523190	0.339	0.494	2641	0	0.203	2594	0.245	0.053	3.24	0.672	0.35	3135	0.323	0.5	2466	0.562	0.351	1.6	0.118	0.419	As548_TRINITY_DN10906_c1_g2	1.41e-78	NBSLRR	104	364	0.569	0	1058	chr6B	696356647	100	1774	0	3277	chr6B	696302743	82154	1541
TRINITY_DN21084_c0_g1_i10	3044	2	NA	NA	NA	TRINITY_DN21084_c0_g1	4059	NA	NA	NA	jcf7180001544513	0	0.217	0.197	0	0.375	0.32	0	0.186	0.592	0.119	0.144	0.427	0.43	0.432	0.528	0.208	0.435	0	0	0.308	As548_TRINITY_DN16132_c1_g1	6.06e-68	NA	NA	NA	0.769	0.844	0.785	chr6S	616039692	96774	93	2.05e-34	154	chr6S	349059538	79208	202
TRINITY_DN2111_c0_g1_i3	3175	2	NA	NA	NA	TRINITY_DN2111_c0_g1	5995	NA	NA	NA	NA	0.135	3577	6116	6.03	8.87	9808	2.85	1185	7062	2093	2.37	10323	2346	6012	9548	1467	1861	13092	1806	1281	As548_TRINITY_DN20000_c0_g1	0	NA	NA	NA	28.54	52426	82131	NA	NA	NA	NA	NA	NA	NA	NA	NA	NA
TRINITY_DN2114_c0_g1_i16	2811	2	NA	NA	NA	TRINITY_DN2114_c0_g1	3521	NA	NA	NA	jcf7180001822445	0	0.855	1633	1264	1521	0.806	1518	0	0.935	2385	0.7	1.12	1818	3604	2572	0	0	1875	1677	0.83	As548_TRINITY_DN1343_c0_g3	0	NA	NA	NA	5374	5797	6669	NA	NA	NA	NA	NA	NA	NA	NA	NA	NA
TRINITY_DN21191_c0_g1_i11	953	2	NA	NA	NA	TRINITY_DN21191_c0_g1	2473	NA	NA	NA	jcf7180001792789	0	0.819	0.753	0.83	0.385	1033	0	1512	1361	0.423	0	0.885	0.225	1083	0.854	1696	0.801	0.234	1655	0	As548_TRINITY_DN5740_c0_g1	0	NA	NA	NA	12517	4864	3744	NA	NA	NA	NA	NA	NA	NA	NA	NA	NA
TRINITY_DN21191_c0_g1_i12	1601	2	NA	NA	NA	TRINITY_DN21191_c0_g1	2473	NA	NA	NA	jcf7180001745709	0.528	0	0.996	0	0.507	0.672	0	0	1901	0.314	0.512	0.853	1075	1068	0.441	0.135	0.604	0	0	2213	As548_TRINITY_DN5740_c0_g1	0	NA	NA	NA	12517	4864	3744	NA	NA	NA	NA	NA	NA	NA	NA	NA	NA
TRINITY_DN2119_c0_g1_i13	2090	2	NA	NA	NA	TRINITY_DN2119_c0_g1	2796	NA	NA	NA	NA	0.583	2252	1112	0.927	2869	1282	0.382	4174	1641	0.737	1248	1952	0.225	2377	1468	0.333	1412	0.397	0.462	1028	As548_TRINITY_DN99725_c0_g1	0	NA	NA	NA	6144	17707	8308	NA	NA	NA	NA	NA	NA	NA	NA	NA	NA
TRINITY_DN2119_c0_g1_i24	2044	2	NA	NA	NA	TRINITY_DN2119_c0_g1	2796	NA	NA	NA	NA	0	1481	0.174	0	0	0.351	0	0.389	0.208	0	0.557	0	0.235	0.401	0.154	1.28	1278	0	0.193	0.008	As548_TRINITY_DN99725_c0_g1	0	NA	NA	NA	6144	17707	8308	NA	NA	NA	NA	NA	NA	NA	NA	NA	NA
TRINITY_DN21256_c0_g1_i5	4513	2	NA	NA	NA	TRINITY_DN21256_c0_g1	4619	NA	NA	NA	NA	0	0	0.973	0	0.659	1168	0	0	1194	0.651	0.503	1482	0.557	0.742	1171	0.447	0.815	0.153	0	0	As548_TRINITY_DN4438_c0_g1	0	NA	NA	NA	3067	1.24	6009	NA	NA	NA	NA	NA	NA	NA	NA	NA	NA
TRINITY_DN2139_c0_g1_i17	3118	2	NA	NA	NA	TRINITY_DN2139_c0_g1	6106	NA	NA	NA	NA	0	4745	3672	0	2484	1933	0	1335	2648	1431	1957	2549	0.635	2.96	5124	0.26	3182	0.591	0	3597	As548_TRINITY_DN405_c0_g1	0	NA	NA	NA	2158	9852	6942	NA	NA	NA	NA	NA	NA	NA	NA	NA	NA
TRINITY_DN213_c0_g1_i8	1688	2	NA	NA	NA	TRINITY_DN213_c0_g1	2485	NA	NA	NA	jcf7180001932212	0.122	2011	0.834	0.951	0.781	1788	0	1088	1485	0	0.341	1152	1417	1287	1823	0.895	2.36	1386	0.602	0.814	As548_TRINITY_DN13178_c0_g1	0	NA	NA	NA	8191	7547	7978	chr6B	341955214	93548	186	7.11e-72	278	chr6B	341547367	93023	129
TRINITY_DN2156_c0_g1_i2	3427	2	NA	NA	NA	TRINITY_DN2156_c0_g1	3739	NA	NA	NA	NA	0.393	1915	0	0	2534	0.496	0	0.69	0.561	1952	1948	0.139	1202	2135	0.557	0.666	1342	1814	0.494	0.142	As548_TRINITY_DN2990_c0_g1	0	NA	NA	NA	1998	6632	7591	NA	NA	NA	NA	NA	NA	NA	NA	NA	NA
TRINITY_DN2156_c0_g1_i8	3110	2	NA	NA	NA	TRINITY_DN2156_c0_g1	3739	NA	NA	NA	NA	3523	9719	7309	0.818	1673	5705	0.372	4555	5.92	1865	5.98	6196	4164	10873	7773	5359	10774	0.509	1408	4577	As548_TRINITY_DN2990_c0_g1	0	NA	NA	NA	1998	6632	7591	NA	NA	NA	NA	NA	NA	NA	NA	NA	NA
TRINITY_DN2160_c0_g1_i8	2278	2	NA	NA	NA	TRINITY_DN2160_c0_g1	2848	NA	NA	NA	jcf7180001533879	0.556	1999	1286	0	0.223	1158	2654	2388	2171	0	0.521	0.97	2414	0.81	1862	0	2002	0	0.43	1747	As548_TRINITY_DN3943_c0_g1	0	NA	NA	NA	11258	10.23	8285	chr6B	470826032	91.95	323	7.61e-122	444	chr6B	470829250	97951	244
TRINITY_DN21657_c2_g1_i1	227	2	NA	NA	NA	TRINITY_DN21657_c2_g1	321	NA	NA	NA	NA	0	0	3544	0	0	5384	62182	0	0	0	0	11401	0	0	0	0	0	0	0	0	As548_TRINITY_DN6586_c0_g2	1.19e-99	NA	NA	NA	4805	6.43	5349	NA	NA	NA	NA	NA	NA	NA	NA	NA	NA
TRINITY_DN21660_c0_g2_i4	471	2	NA	NA	NA	TRINITY_DN21660_c0_g2	2118	NA	NA	NA	NA	0	1734	0.151	0	0	0.723	0	0.425	0	0	0.305	0.704	1398	1817	0.537	0.447	1454	0	0	0	As548_TRINITY_DN3573_c0_g1	1.87e-75	NBSLRR	1263	3169	3077	1064	2219	NA	NA	NA	NA	NA	NA	NA	NA	NA	NA
TRINITY_DN21677_c0_g1_i1	576	2	NA	NA	NA	TRINITY_DN21677_c0_g1	576	NA	NA	NA	NA	0.312	0.698	1019	6.86	2139	1922	0	0.336	3282	4825	1059	3.53	1672	0.954	1478	0.489	0.962	6663	0	2577	As548_TRINITY_DN1049_c4_g1	1.74e-90	NA	NA	NA	18481	24032	34141	NA	NA	NA	NA	NA	NA	NA	NA	NA	NA
TRINITY_DN21763_c0_g1_i3	6245	2	NA	NA	NA	TRINITY_DN21763_c0_g1	6650	NA	NA	NA	NA	0	0.554	0.232	0	0.436	0.176	0	0	0.405	0	0.233	0.8	0.186	0.303	0.461	0.312	1.51	0	0	0	As548_TRINITY_DN6573_c0_g1	0	NA	NA	NA	3297	2243	4404	NA	NA	NA	NA	NA	NA	NA	NA	NA	NA
TRINITY_DN21786_c0_g1_i11	2219	2	NA	NA	NA	TRINITY_DN21786_c0_g1	3057	NA	NA	NA	jcf7180001525476	0.257	0	0.486	0.217	0	0.703	0	0	0.571	1.67	0	1429	1202	0	1699	0.062	0.133	0	0.408	0.514	As548_TRINITY_DN10833_c0_g2	0	NA	NA	NA	8861	0.053	2208	chr6B	23443088	95848	289	4.85e-129	468	chr6B	24916889	97736	265
TRINITY_DN2178_c0_g1_i12	2672	2	NA	NA	NA	TRINITY_DN2178_c0_g1	4172	NA	NA	NA	NA	0.65	1831	2409	0	0.395	2129	0	0.637	1547	0.792	0.117	2336	0.723	0.727	3128	0	1229	1783	0.86	0	As548_TRINITY_DN4166_c0_g1	0	NA	NA	NA	10239	29028	24081	NA	NA	NA	NA	NA	NA	NA	NA	NA	NA
TRINITY_DN21803_c0_g1_i3	719	2	NA	NA	NA	TRINITY_DN21803_c0_g1	1141	NA	NA	NA	jcf7180001528458	0	0.313	0.452	0	0	0.93	0	0.566	0.395	0	0.79	0.64	0.352	0.522	0.355	0.062	1131	0	0	0	As548_TRINITY_DN13352_c0_g1	0	NA	NA	NA	1349	3888	0.58	chr6S	613390698	91237	194	3.24e-67	261	chr6S	126012867	86631	187
TRINITY_DN2187_c0_g1_i12	771	2	NA	NA	NA	TRINITY_DN2187_c0_g1	3324	NA	NA	NA	NA	1585	1421	1934	0	0	2201	0	1097	1007	0	2981	2101	0.577	4444	2764	0.437	2493	1.08	1601	5439	As548_TRINITY_DN23643_c0_g1	1.26e-133	NA	NA	NA	0.709	1.61	0.956	NA	NA	NA	NA	NA	NA	NA	NA	NA	NA
TRINITY_DN21926_c0_g1_i11	1214	2	NA	NA	NA	TRINITY_DN21926_c0_g1	2013	NA	NA	NA	NA	0.393	1855	1124	0	0	1292	1655	1026	2.97	1594	1059	2464	1887	2847	3733	1769	1342	2303	1086	0.538	As548_TRINITY_DN1704_c0_g2	1.02e-107	NA	NA	NA	69877	58777	40673	NA	NA	NA	NA	NA	NA	NA	NA	NA	NA
TRINITY_DN21926_c0_g1_i2	1097	2	NA	NA	NA	TRINITY_DN21926_c0_g1	2013	NA	NA	NA	NA	1328	2975	2293	0.614	1713	3152	2399	2954	3905	0.813	2496	4085	2.59	3975	4587	3319	4713	1854	1816	3265	As548_TRINITY_DN1704_c0_g2	1.02e-107	NA	NA	NA	69877	58777	40673	NA	NA	NA	NA	NA	NA	NA	NA	NA	NA
TRINITY_DN2194_c0_g1_i28	3469	2	NA	NA	NA	TRINITY_DN2194_c0_g1	4494	NA	NA	NA	NA	0.095	0.879	0.718	0	0.852	0.475	0.245	0.822	0.54	0	1113	0.533	0.137	1174	0.796	0	1011	0.998	0.054	2103	As548_TRINITY_DN3862_c0_g2	0	NA	NA	NA	5684	17373	4142	NA	NA	NA	NA	NA	NA	NA	NA	NA	NA
TRINITY_DN21953_c0_g1_i15	3758	2	NA	NA	NA	TRINITY_DN21953_c0_g1	4411	NA	NA	NA	jcf7180001630423	0	0.446	0	0	0.193	0	0	0	0	0	0	0.149	0	0	0.24	0	0	0	0	0	As548_TRINITY_DN12634_c0_g1	0	NA	NA	NA	8911	17672	11619	NA	NA	NA	NA	NA	NA	NA	NA	NA	NA
TRINITY_DN2203_c0_g1_i3	1961	2	NA	NA	NA	TRINITY_DN2203_c0_g1	2508	NA	NA	NA	jcf7180001732796	2873	1686	2919	0	4987	1674	0	3.06	0.831	1843	2631	1333	1.72	2605	2697	2695	3547	1549	0	5399	As548_TRINITY_DN1183_c0_g1	0	NA	NA	NA	19619	28817	19221	NA	NA	NA	NA	NA	NA	NA	NA	NA	NA
TRINITY_DN2209_c0_g1_i1	1847	2	NA	NA	NA	TRINITY_DN2209_c0_g1	2917	NA	NA	NA	NA	0.474	0.927	0.73	0	0.446	0.692	0.607	0.531	1423	0	0.835	1354	0.635	0.659	1.2	0.947	0.843	0.499	0.634	0.609	As548_TRINITY_DN36898_c0_g1	0	NA	NA	NA	1678	1803	3619	NA	NA	NA	NA	NA	NA	NA	NA	NA	NA
TRINITY_DN220_c0_g1_i11	2013	2	NA	NA	NA	TRINITY_DN220_c0_g1	3026	NA	NA	NA	jcf7180001730116	0.935	10092	8884	2383	7542	24256	0	2149	18684	1822	4516	23089	2141	8647	17551	2965	2957	16933	1558	2.98	As548_TRINITY_DN1420_c0_g1	0	NA	NA	NA	883535	339321	772852	chr6B	431160860	93678	174	8.74e-67	261	chr6B	431204738	93103	174
TRINITY_DN2210_c0_g1_i8	2322	2	NA	NA	NA	TRINITY_DN2210_c0_g1	3013	NA	NA	NA	NA	2778	2854	4008	2118	2625	3.4	5817	3829	4.58	1919	2496	4565	4575	2.87	6737	4672	3266	2.14	1408	2277	As548_TRINITY_DN2200_c1_g3	0	NA	NA	NA	5494	3395	10458	NA	NA	NA	NA	NA	NA	NA	NA	NA	NA
TRINITY_DN2219_c0_g1_i4	1921	2	NA	NA	NA	TRINITY_DN2219_c0_g1	2607	NA	NA	NA	NA	0	1734	3301	0.722	0.446	1612	0	1114	3137	0	0.979	1877	0.518	1302	1.66	0.812	2107	2323	0.107	1692	As548_TRINITY_DN8066_c0_g3	0	NA	NA	NA	0.499	2868	1753	NA	NA	NA	NA	NA	NA	NA	NA	NA	NA
TRINITY_DN22218_c0_g1_i4	2784	2	NA	NA	NA	TRINITY_DN22218_c0_g1	3303	NA	NA	NA	jcf7180001585928	0.203	0.927	0.973	0.313	0	1344	1038	0.478	0.447	0.965	0.988	1237	0.616	0.901	1171	1613	0.225	0.652	0	0	As548_TRINITY_DN3960_c0_g1	0	NA	NA	NA	3087	3818	2105	chr6B	716621445	85398	226	5.79e-59	235	chr6B	716621709	86429	140
TRINITY_DN2222_c0_g1_i3	2029	2	NA	NA	NA	TRINITY_DN2222_c0_g1	2494	NA	NA	NA	jcf7180001928463	0.42	2.12	1042	1757	2119	0.413	2517	4.67	0.904	1052	3861	0.651	1251	2567	1027	0.884	2009	1121	3.02	5621	As548_TRINITY_DN852_c0_g1	0	NA	NA	NA	12837	32793	16467	chr6B	452616788	97748	444	0	765	chr6B	452617808	91211	512
TRINITY_DN222_c0_g1_i34	1521	2	NA	NA	NA	TRINITY_DN222_c0_g1	3596	NA	NA	NA	jcf7180001705430	0.406	0.494	0.29	0	0.487	0	0	0.15	0.239	0	1437	0.181	0.587	1817	0	0.593	1538	0	0	1.36	As548_TRINITY_DN1842_c0_g1	0	NA	NA	NA	34404	91711	24706	chr6S	622579827	97521	121	4.95e-50	206	NA	NA	NA	NA
TRINITY_DN222_c0_g1_i45	1390	2	NA	NA	NA	TRINITY_DN222_c0_g1	3596	NA	NA	NA	jcf7180001705430	144736	170867	14583	24336	78217	2315	153556	319058	15838	60266	249747	2293	163.48	295368	6852	155378	220.47	4493	94225	145551	As548_TRINITY_DN1842_c0_g1	0	NA	NA	NA	34404	91711	24706	chr6S	622579827	97521	121	4.95e-50	206	NA	NA	NA	NA
TRINITY_DN2234_c0_g1_i23	2268	2	NA	NA	NA	TRINITY_DN2234_c0_g1	3002	NA	NA	NA	jcf7180001929593	0	1.06	0.208	0	0	1095	0	0.876	0.488	1334	0.395	1472	0.899	0.78	1507	0	0.997	0.183	0.591	0	As548_TRINITY_DN2019_c0_g1	0	NA	NA	NA	6513	5647	5781	chr6B	691829693	90244	164	2.46e-52	213	NA	NA	NA	NA
TRINITY_DN22390_c0_g1_i7	1400	2	NA	NA	NA	TRINITY_DN22390_c0_g1	1709	NA	NA	NA	jcf7180001933594	0	0.494	0.301	0	0	0	0	0	0.415	0	0	0	0.616	0.522	0.537	0.832	0.527	0	0	0	As548_TRINITY_DN5554_c0_g1	2.62e-43	NA	NA	NA	60257	46.04	8262	chr6B	560623954	97004	267	3.51e-123	448	chr6B	560624115	93789	161
TRINITY_DN22436_c0_g1_i33	1635	2	NA	NA	NA	TRINITY_DN22436_c0_g1	3507	NA	NA	NA	NA	0.461	0	1.83	0	1004	2894	0.979	0	1942	0	0	1866	1.76	0.719	1958	2.06	0.309	0	0	0	As548_TRINITY_DN8779_c0_g1	0	NA	NA	NA	1938	7802	2936	NA	NA	NA	NA	NA	NA	NA	NA	NA	NA
TRINITY_DN2246_c1_g1_i8	1135	2	NA	NA	NA	TRINITY_DN2246_c1_g1	1551	NA	NA	NA	jcf7180001935160	2845	0.723	3266	5404	1156	3514	0	0.637	3365	2017	1508	2613	1.3	1401	2869	3278	1004	5013	4.03	4688	As548_TRINITY_DN273_c0_g3	0	NA	NA	NA	6024	1205	6339	chr6S	796362516	91388	418	1.41e-156	558	chr6S	796359686	93559	295
TRINITY_DN2248_c0_g1_i3	5072	2	NA	NA	NA	TRINITY_DN2248_c0_g1	5485	NA	NA	NA	jcf7180001542200	0.623	1734	0.347	0	0.182	0.558	0.499	0.584	0.54	0.52	0.682	0.373	1.3	1136	0.345	0.832	1545	0.224	0.559	0.316	As548_TRINITY_DN1240_c0_g2	0	NA	NA	NA	2078	1619	2117	chr6B	455458902	92691	1286	0	1832	chr6B	455459536	90136	294
TRINITY_DN2250_c0_g1_i6	1929	2	NA	NA	NA	TRINITY_DN2250_c0_g1	2667	NA	NA	NA	NA	0	1192	0	0	0	0	0	0.097	0	0	0.215	0.373	0	0	0	0	0	0	0	0.98	As548_TRINITY_DN980_c0_g1	0	NA	NA	NA	9.27	11717	8285	NA	NA	NA	NA	NA	NA	NA	NA	NA	NA
TRINITY_DN2250_c0_g1_i8	1929	2	NA	NA	NA	TRINITY_DN2250_c0_g1	2667	NA	NA	NA	NA	2466	3697	2.27	1902	4126	2005	0.646	3573	1807	1713	3151	2581	4839	4831	2917	3.34	4.91	0.387	1086	2988	As548_TRINITY_DN980_c0_g1	0	NA	NA	NA	9.27	11717	8285	NA	NA	NA	NA	NA	NA	NA	NA	NA	NA
TRINITY_DN22630_c0_g1_i5	3156	2	NA	NA	NA	TRINITY_DN22630_c0_g1	3611	NA	NA	NA	NA	0	0	0.301	0	0	0	0	0	0	0	0	0	0.039	0	0.106	0	0	0.774	0	0	As548_TRINITY_DN2379_c0_g2	0	NA	NA	NA	1019	0.669	1013	NA	NA	NA	NA	NA	NA	NA	NA	NA	NA
TRINITY_DN22669_c0_g2_i3	1566	2	NA	NA	NA	TRINITY_DN22669_c0_g2	1809	NA	NA	NA	NA	0	0	0.846	1372	0.112	1819	0	0.478	0.955	0.108	0.063	0.843	0.469	0	1161	1113	0.077	2863	0.591	0	As548_TRINITY_DN72773_c0_g1	3.47e-67	NA	NA	NA	0	0	4643	NA	NA	NA	NA	NA	NA	NA	NA	NA	NA
TRINITY_DN22733_c0_g2_i2	1022	2	NA	NA	NA	TRINITY_DN22733_c0_g2	2117	NA	NA	NA	NA	0	0	0.324	0	0	0.775	0	0	0.955	0	0	0.107	0.059	0.719	0.624	0.062	0.133	0.265	0	0	As548_TRINITY_DN761_c0_g5	2.05e-10	NA	NA	NA	163729	0	0	chr6B	145374177	88462	52	1.84e-07	63.9	NA	NA	NA	NA
TRINITY_DN22810_c0_g1_i11	3032	2	NA	NA	NA	TRINITY_DN22810_c0_g1	3419	NA	NA	NA	jcf7180001866988	0	0.422	0.023	0.433	0.01	0.134	0	0.504	0.093	0	0.485	0.213	0.665	0.174	0.326	0.208	0.927	0	0	0	As548_TRINITY_DN10003_c0_g1	1.9e-42	NBSLRR	1575	3482	2737	0.308	1.32	chr6B	117845949	98507	67	6.3e-24	119	chr6B	393070560	98507	67
TRINITY_DN22861_c0_g1_i7	1583	2	NA	NA	NA	TRINITY_DN22861_c0_g1	2705	NA	NA	NA	NA	0.23	1228	1008	0	0.243	0.775	0	0.69	0.924	0	0.251	1.28	0.596	0.719	1.43	0.531	0.815	0	0	0	As548_TRINITY_DN501_c0_g1	0	NA	NA	NA	20469	5894	2583	NA	NA	NA	NA	NA	NA	NA	NA	NA	NA
TRINITY_DN2289_c0_g1_i17	5288	2	NBSLRR	2286	4325	TRINITY_DN2289_c0_g1	5803	NBSLRR	2505	4728	jcf7180001531312	0.637	2.12	1181	0.156	1176	1.54	0.695	0.708	0.924	0.26	1428	1034	1114	1507	0.883	1342	1714	0	0.634	0.64	As548_TRINITY_DN6644_c1_g1	0	NBSLRR	257	1814	1039	2498	3277	NA	NA	NA	NA	NA	NA	NA	NA	NA	NA
TRINITY_DN2289_c0_g1_i20	5294	2	NBSLRR	2286	4331	TRINITY_DN2289_c0_g1	5803	NBSLRR	2505	4728	jcf7180001531312	0	2782	0.776	0	2534	0.62	0	1565	0.592	0	0.485	1696	1124	1242	0.662	2237	2753	1039	0.129	0	As548_TRINITY_DN6644_c1_g1	0	NBSLRR	257	1814	1039	2498	3277	NA	NA	NA	NA	NA	NA	NA	NA	NA	NA
TRINITY_DN228_c0_g1_i25	4278	2	NA	NA	NA	TRINITY_DN228_c0_g1	5911	NA	NA	NA	NA	1165	2.83	2143	0.554	3031	2387	0.362	1327	2337	1431	1894	1.28	2346	2256	1372	2945	3196	0	0	0	As548_TRINITY_DN1398_c0_g1	0	NA	NA	NA	15024	16352	12928	chr6B	716881493	90909	55	2.4e-10	75	NA	NA	NA	NA
TRINITY_DN2294_c0_g1_i6	1662	2	NA	NA	NA	TRINITY_DN2294_c0_g1	2350	NA	NA	NA	NA	0.285	0	1.1	0	0	0.713	0.323	0.371	1.62	0	0	1504	0.802	0.28	1459	0.312	0.183	0.092	0.118	0	As548_TRINITY_DN11642_c0_g1	0	NA	NA	NA	2817	1302	7431	NA	NA	NA	NA	NA	NA	NA	NA	NA	NA
TRINITY_DN2295_c0_g1_i2	2519	2	NA	NA	NA	TRINITY_DN2295_c0_g1	2912	NA	NA	NA	NA	1463	2722	0.938	1432	2676	1302	1263	3511	0.634	0.304	2056	1237	3627	3513	1555	3028	2.88	0.428	2321	2.15	As548_TRINITY_DN5273_c1_g1	0	NA	NA	NA	8811	7072	5485	NA	NA	NA	NA	NA	NA	NA	NA	NA	NA
TRINITY_DN22978_c0_g1_i3	817	2	NA	NA	NA	TRINITY_DN22978_c0_g1	1037	NA	NA	NA	NA	0	0.47	0	0	0	0	1528	0.637	0	2483	0	0.288	0.098	0	0	0.312	0	0	0.344	0	As548_TRINITY_DN32165_c0_g1	2.38e-116	NA	NA	NA	4915	5401	4871	NA	NA	NA	NA	NA	NA	NA	NA	NA	NA
TRINITY_DN2297_c0_g1_i10	2343	2	NA	NA	NA	TRINITY_DN2297_c0_g1	2933	NA	NA	NA	NA	0.474	3733	3.29	2407	4592	2418	0	0	3635	1605	1652	2943	2854	3415	1564	1675	1496	3148	2117	5842	As548_TRINITY_DN7509_c0_g1	0	NA	NA	NA	5324	7539	15284	NA	NA	NA	NA	NA	NA	NA	NA	NA	NA
TRINITY_DN2302_c0_g1_i6	2332	2	NA	NA	NA	TRINITY_DN2302_c0_g1	2875	NA	NA	NA	NA	1.07	3492	1.39	0	2352	1.54	2575	3.44	1101	0.445	3942	1098	1036	2817	0.825	4308	2121	0	3042	2672	As548_TRINITY_DN25781_c0_g1	0	NA	NA	NA	5584	8568	4017	NA	NA	NA	NA	NA	NA	NA	NA	NA	NA
TRINITY_DN23035_c0_g1_i3	607	2	NA	NA	NA	TRINITY_DN23035_c0_g1	1028	NA	NA	NA	jcf7180001898560	0	0	2583	0	0	0.754	0	0	0.519	0	0	1888	0	0.091	2965	0.375	0.288	0.835	0	0	As548_TRINITY_DN2526_c0_g1	8.71e-96	NA	NA	NA	1309	1284	9628	chr6S	795857938	79839	248	8.4e-43	180	NA	NA	NA	NA
TRINITY_DN2313_c1_g1_i1	2966	2	NA	NA	NA	TRINITY_DN2313_c1_g1	4020	NA	NA	NA	NA	0.65	1.06	1483	0.782	0.801	2015	0.685	0.336	1662	0.477	1266	2346	1378	0.931	2.14	2227	0.667	0.601	0	2427	As548_TRINITY_DN1795_c0_g1	0	NA	NA	NA	6164	3369	9423	NA	NA	NA	NA	NA	NA	NA	NA	NA	NA
TRINITY_DN23471_c0_g1_i1	1661	2	NA	NA	NA	TRINITY_DN23471_c0_g1	2388	NA	NA	NA	NA	0.244	3203	0.012	0	4967	0	0	4926	0	0	6096	0.043	0.293	2945	0	0.146	2163	0	0.634	0.545	As548_TRINITY_DN50189_c0_g1	2.02e-105	NA	NA	NA	0	1188	0.615	chr6S	747902985	84259	108	4.42e-19	102	NA	NA	NA	NA
TRINITY_DN2348_c0_g1_i23	2693	2	NA	NA	NA	TRINITY_DN2348_c0_g1	5172	NA	NA	NA	NA	0	0.446	0.22	0	0	0.899	0	0	2056	1312	0.691	0.704	0.85	1052	1132	0.302	0.471	1314	1462	1099	As548_TRINITY_DN37980_c0_g1	4.16e-145	NA	NA	NA	0.789	0.589	1627	NA	NA	NA	NA	NA	NA	NA	NA	NA	NA
TRINITY_DN23499_c0_g1_i3	501	2	NA	NA	NA	TRINITY_DN23499_c0_g1	2145	NA	NA	NA	NA	0	0.735	0	0	0	0.072	0	0.805	0.374	0	0	0	0	0.924	0	0	0	0	0	2213	As548_TRINITY_DN18691_c0_g1	2.93e-128	NA	NA	NA	0	0	1923	NA	NA	NA	NA	NA	NA	NA	NA	NA	NA
TRINITY_DN23525_c0_g1_i10	2066	2	NA	NA	NA	TRINITY_DN23525_c0_g1	2293	NA	NA	NA	NA	0	0.602	0.544	1565	0.152	0.403	0	0	0.228	0.867	0.44	0.875	0.44	0.598	1008	0.031	0.737	0.489	0	0.806	As548_TRINITY_DN22458_c1_g1	0	NA	NA	NA	2497	2296	4928	chr6S	801712329	98438	64	1.96e-22	113	chr6S	767644116	95312	64
TRINITY_DN23747_c0_g1_i5	3548	2	NA	NA	NA	TRINITY_DN23747_c0_g1	3722	NA	NA	NA	jcf7180001598218	0	0.891	0.672	0	0.416	0.506	0	0.929	0.665	0	0.108	1.45	0.626	0.432	0.345	0.302	0.569	0.306	0.226	0.364	As548_TRINITY_DN11298_c0_g1	0	NA	NA	NA	0.979	1865	1.24	NA	NA	NA	NA	NA	NA	NA	NA	NA	NA
TRINITY_DN2381_c0_g1_i14	1817	2	NA	NA	NA	TRINITY_DN2381_c0_g1	2489	NA	NA	NA	NA	0	2372	4042	2.13	2139	1.85	0	5545	2316	0	3466	2773	3.04	3415	5451	1779	4657	0	2214	1763	As548_TRINITY_DN332_c0_g1	0	NA	NA	NA	11348	20.24	21896	NA	NA	NA	NA	NA	NA	NA	NA	NA	NA
TRINITY_DN2383_c0_g1_i2	284	2	NA	NA	NA	TRINITY_DN2383_c0_g1	1696	NA	NA	NA	NA	0	0	0.498	0	0	0.465	0	2255	1662	0	3062	0	0	4013	0	0	4299	0	0	0	As548_TRINITY_DN9788_c0_g1	0	NA	NA	NA	6443	14417	3847	chr6B	716156787	89474	57	2.45e-10	73.1	NA	NA	NA	NA
TRINITY_DN23923_c0_g1_i2	1942	2	NA	NA	NA	TRINITY_DN23923_c0_g1	2987	NA	NA	NA	NA	1518	2312	1042	0.83	3092	0.992	1332	5147	1298	1648	3888	1045	2.18	3119	1603	2674	4551	0.214	0.548	2901	As548_TRINITY_DN149_c2_g1	0	NA	NA	NA	11908	29.31	31227	NA	NA	NA	NA	NA	NA	NA	NA	NA	NA
TRINITY_DN2395_c0_g1_i12	1451	2	NA	NA	NA	TRINITY_DN2395_c0_g1	3085	NA	NA	NA	jcf7180001930483	1531	2108	2525	2335	1.49	1581	0	1044	2306	1822	1437	2336	2258	1257	3138	2071	3385	1162	1365	1945	As548_TRINITY_DN1723_c0_g1	0	NA	NA	NA	6313	14866	14.51	chr6B	673068373	93.59	78	7.35e-23	115	chr6B	663040988	92105	76
TRINITY_DN2397_c0_g1_i18	1524	2	NA	NA	NA	TRINITY_DN2397_c0_g1	2315	NA	NA	NA	jcf7180001552261	0	0	0.208	0	0.558	0	0	0.61	0.706	0.184	0.431	0	0	0	0.499	0	0.049	0	0	0	As548_TRINITY_DN127_c0_g1	0	NA	NA	NA	12497	10072	13406	NA	NA	NA	NA	NA	NA	NA	NA	NA	NA
TRINITY_DN23_c0_g1_i11	1395	2	NA	NA	NA	TRINITY_DN23_c0_g1	2260	NA	NA	NA	NA	0.149	0.638	1355	2588	0	2677	2624	6624	1402	1214	5351	0	0	0	0	3.59	0	0	2848	3565	As548_TRINITY_DN4582_c0_g1	0	NA	NA	NA	18561	39496	35119	NA	NA	NA	NA	NA	NA	NA	NA	NA	NA
TRINITY_DN2411_c0_g1_i17	2506	2	NA	NA	NA	TRINITY_DN2411_c0_g1	4879	NA	NA	NA	jcf7180001719792	7208	32131	8235	4321	26711	1209	7021	22534	1797	6246	34567	2538	10587	30.18	3675	10436	29163	0.428	0.957	9202	As548_TRINITY_DN1436_c0_g1	3.03e-146	NA	NA	NA	2847	53139	0.535	chr6S	699987766	84946	93	1.52e-16	95.3	NA	NA	NA	NA
TRINITY_DN2413_c2_g1_i1	1293	2	NA	NA	NA	TRINITY_DN2413_c2_g1	1335	NA	NA	NA	jcf7180001866336	0.705	0	0.822	0	0	0.785	0.274	0	0.156	1041	0.449	1717	0.997	0	0.643	0.749	0.105	1.07	0.892	0.15	As548_TRINITY_DN217_c1_g1	0	NA	NA	NA	2847	3008	4552	chr6S	145638983	98.37	368	0	647	chr6S	145635449	97015	134
TRINITY_DN24185_c0_g4_i2	437	2	NA	NA	NA	TRINITY_DN24185_c0_g4	802	NA	NA	NA	NA	0	0.626	0	0	0	0	0	0	0	0	0	0	0	0	0	0	0	0	0	0	As548_TRINITY_DN31243_c0_g2	6.51e-121	NA	NA	NA	0	2199	0.467	NA	NA	NA	NA	NA	NA	NA	NA	NA	NA
TRINITY_DN2423_c0_g1_i5	1120	2	NA	NA	NA	TRINITY_DN2423_c0_g1	2602	NA	NA	NA	NA	1098	1.65	0.533	0.758	3801	1209	0	1044	2898	1496	1383	1909	2.61	2.37	1334	2539	3062	4.34	2031	2142	As548_TRINITY_DN670_c0_g1	0	NA	NA	NA	7912	24.7	4655	NA	NA	NA	NA	NA	NA	NA	NA	NA	NA
TRINITY_DN242_c0_g1_i1	3353	2	NBSLRR	207	2734	TRINITY_DN242_c0_g1	6559	NBSLRR	261	4700	NA	0	2553	1958	1143	0.649	1447	0	1557	2773	0	1751	1514	0.753	2453	1967	1217	2985	1111	0.193	1067	As548_TRINITY_DN5002_c0_g1	0	NBSLRR	1128	3968	3606	2982	1821	NA	NA	NA	NA	NA	NA	NA	NA	NA	NA
TRINITY_DN2436_c0_g1_i3	5591	2	NA	NA	NA	TRINITY_DN2436_c0_g1	6076	NA	NA	NA	NA	1219	3191	2085	1372	2615	3721	1.91	2.37	2866	1637	3726	2901	3236	5.8	3138	4297	6764	0.265	0	1755	As548_TRINITY_DN1376_c0_g2	0	NA	NA	NA	3616	3105	3938	chr6S	59994711	89954	219	2.27e-70	274	chr6S	59994749	93478	46
TRINITY_DN243_c1_g1_i7	1735	2	NA	NA	NA	TRINITY_DN243_c1_g1	2129	NA	NA	NA	NA	0	0.951	0.521	0.806	0	0.176	0	1212	0.249	0	0.242	0.907	0.274	0	1507	0.468	1075	0	0	0	As548_TRINITY_DN1297_c1_g1	0	NA	NA	NA	4755	10732	5132	NA	NA	NA	NA	NA	NA	NA	NA	NA	NA
TRINITY_DN2448_c0_g1_i4	531	2	NA	NA	NA	TRINITY_DN2448_c0_g1	3057	NA	NA	NA	NA	2.29	2071	2305	0.108	1885	4547	0	0.522	4.31	0	3529	2677	0.616	0.999	1871	2549	1566	1223	0	0	As548_TRINITY_DN9819_c1_g1	0	NA	NA	NA	6723	12992	7124	NA	NA	NA	NA	NA	NA	NA	NA	NA	NA
TRINITY_DN2450_c0_g1_i8	1443	2	NA	NA	NA	TRINITY_DN2450_c0_g1	2336	NA	NA	NA	jcf7180001649426	1219	0.807	2467	0.301	0	2026	1195	0	1361	0.466	0.476	2.89	0.792	0.848	1727	0.999	0.232	2588	0.43	0	As548_TRINITY_DN815_c1_g1	0	NA	NA	NA	4965	3334	10993	chr6B	516563037	97	100	4.2e-39	169	NA	NA	NA	NA
TRINITY_DN24805_c0_g1_i9	1418	2	NA	NA	NA	TRINITY_DN24805_c0_g1	2239	NA	NA	NA	NA	0	0	1344	0	1551	0.548	3682	0.69	1568	2646	0.189	0.672	0.332	0	0.681	1145	0.028	0	2332	0.134	As548_TRINITY_DN8866_c0_g1	0	NA	NA	NA	1399	1073	3767	NA	NA	NA	NA	NA	NA	NA	NA	NA	NA
TRINITY_DN24856_c0_g1_i2	682	2	NA	NA	NA	TRINITY_DN24856_c0_g1	3756	NA	NA	NA	jcf7180001863565	0.19	1409	0.869	1095	1754	1747	1831	0.416	0.685	0	0.826	1066	0.802	1628	1353	3.33	2.1	0	0	0	As548_TRINITY_DN18762_c0_g1	0	NA	NA	NA	2138	0.466	1138	chr6S	790580921	98	50	1.95e-14	87.9	NA	NA	NA	NA
TRINITY_DN2485_c1_g1_i15	2173	2	NA	NA	NA	TRINITY_DN2485_c1_g1	2765	NA	NA	NA	NA	0	0	0.046	0.144	0	0	0	0	0	0	0.781	0	0	0	0.058	0.541	0	0	0	0	As548_TRINITY_DN18261_c0_g1	1.22e-23	NA	NA	NA	1518	0.51	0.854	chr6S	567689668	92857	42	3.13e-06	60.2	NA	NA	NA	NA
TRINITY_DN2485_c5_g1_i4	353	2	NA	NA	NA	TRINITY_DN2485_c5_g1	557	NA	NA	NA	NA	0	2372	0.846	0	0	1592	0	0	0.966	4.76	1167	1546	3969	1651	2476	0.593	0	3515	0	0	As548_TRINITY_DN2137_c0_g2	2.87e-73	NA	NA	NA	3097	1258	4859	NA	NA	NA	NA	NA	NA	NA	NA	NA	NA
TRINITY_DN2486_c0_g1_i4	852	2	NA	NA	NA	TRINITY_DN2486_c0_g1	2469	NA	NA	NA	NA	0	1	0.683	0	2372	0.703	0	0.716	1433	0	0	0.267	1065	0.833	0.422	1301	1377	0.051	0	0	As548_TRINITY_DN6627_c0_g1	0	NA	NA	NA	4076	8.84	5098	NA	NA	NA	NA	NA	NA	NA	NA	NA	NA
TRINITY_DN24877_c0_g1_i1	5016	2	NA	NA	NA	TRINITY_DN24877_c0_g1	5401	NA	NA	NA	jcf7180001586880	0.081	0	0.405	0	0	0.951	0	0.071	0.488	0.054	0.242	0.96	0.254	0.394	0.816	0.219	0.386	0.693	0	0.071	As548_TRINITY_DN38736_c0_g1	0	NA	NA	NA	0	0.255	2743	NA	NA	NA	NA	NA	NA	NA	NA	NA	NA
TRINITY_DN2491_c0_g1_i7	2918	2	NA	NA	NA	TRINITY_DN2491_c0_g1	3184	NA	NA	NA	jcf7180001527030	0.989	2156	0.996	0	1774	0.568	0.832	0.867	1257	0.857	0.997	0.896	2199	1757	0.595	2133	1517	0	1032	1036	As548_TRINITY_DN6203_c0_g1	0	NA	NA	NA	4705	5234	3892	chr6B	475271573	88.05	159	4.41e-45	189	NA	NA	NA	NA
TRINITY_DN2495_c0_g1_i10	2631	2	NA	NA	NA	TRINITY_DN2495_c0_g1	5837	NA	NA	NA	NA	8807	8105	14386	14707	40457	38549	11614	19306	41512	15538	19717	30768	11.32	12675	15891	9635	17784	17484	16799	26063	As548_TRINITY_DN7004_c1_g1	0	NA	NA	NA	12667	9.5	16433	NA	NA	NA	NA	NA	NA	NA	NA	NA	NA
TRINITY_DN2504_c0_g1_i34	7939	2	NA	NA	NA	TRINITY_DN2504_c0_g1	8156	NA	NA	NA	jcf7180001555146	0.447	1806	0.568	0.481	1166	1654	0	0.84	1.88	1008	1365	1898	0.86	2075	1756	1342	2149	0	0	0	As548_TRINITY_DN10031_c0_g1	0	NA	NA	NA	2318	2375	2777	NA	NA	NA	NA	NA	NA	NA	NA	NA	NA
TRINITY_DN2518_c2_g1_i2	704	2	NA	NA	NA	TRINITY_DN2518_c2_g1	4150	NA	NA	NA	NA	0	1975	0	0	0	0	0	0	0	0	0	0	0	0	0	0	0	0	0	0	As548_TRINITY_DN2774_c0_g1	0	NA	NA	NA	3346	4275	8023	NA	NA	NA	NA	NA	NA	NA	NA	NA	NA
TRINITY_DN2524_c0_g1_i2	1874	2	NA	NA	NA	TRINITY_DN2524_c0_g1	2496	NA	NA	NA	NA	0	0.145	0	1962	1156	0	2556	1167	0	0	0	0	0	0	0	0	0	0	0	0.743	As548_TRINITY_DN1873_c2_g1	0	NA	NA	NA	6603	5339	12234	NA	NA	NA	NA	NA	NA	NA	NA	NA	NA
TRINITY_DN2551_c0_g1_i1	1379	2	NA	NA	NA	TRINITY_DN2551_c0_g1	5077	NA	NA	NA	NA	0.339	0.482	1367	0.927	0.264	0.827	0.783	0.398	0.343	0	0.26	0.896	0.508	0.318	1593	1186	1089	0	0	2221	As548_TRINITY_DN1058_c0_g1	0	NA	NA	NA	7752	9139	11961	NA	NA	NA	NA	NA	NA	NA	NA	NA	NA
TRINITY_DN25607_c1_g1_i1	324	2	NA	NA	NA	TRINITY_DN25607_c1_g1	324	NA	NA	NA	NA	0	0	1645	0	3315	2811	0	5209	1091	0	0.503	1674	2923	1158	3666	3413	4306	0	13671	0.798	As548_TRINITY_DN5012_c0_g1	2.78e-51	NA	NA	NA	4925	3932	2652	NA	NA	NA	NA	NA	NA	NA	NA	NA	NA
TRINITY_DN2562_c0_g1_i10	966	2	NA	NA	NA	TRINITY_DN2562_c0_g1	1401	NA	NA	NA	jcf7180001569859	0.19	0	1251	0	0.172	1602	0	0.327	1142	1594	0	1.29	0.528	0.56	0.749	1176	1159	0	0.333	0.988	As548_TRINITY_DN101527_c0_g1	5.18e-144	NA	NA	NA	1598	4.9	4973	NA	NA	NA	NA	NA	NA	NA	NA	NA	NA
TRINITY_DN2567_c0_g1_i12	3348	2	NA	NA	NA	TRINITY_DN2567_c0_g1	4239	NA	NA	NA	jcf7180001530377	0	0	0.371	0	0.405	0.63	0.48	0.92	0.353	0.596	0	0.171	0.01	0.583	0.576	0.239	0.274	0.071	0	0	As548_TRINITY_DN5253_c0_g1	0	NA	NA	NA	19.02	5973	8763	chr6S	524831834	94643	112	1.65e-40	174	NA	NA	NA	NA
TRINITY_DN25779_c0_g2_i1	778	2	NA	NA	NA	TRINITY_DN25779_c0_g2	1149	NA	NA	NA	jcf7180001913278	0	0.253	0.324	0	0.608	0	0	0	0	0.033	0.961	0	0.254	0	0	0.229	0.752	0	0	0	As548_TRINITY_DN4009_c0_g1	1.29e-79	NA	NA	NA	25284	101299	48411	chr6S	82196117	87831	189	1.99e-54	219	chr6S	795797548	82.71	214
TRINITY_DN25803_c0_g1_i7	3579	2	NBSLRR	258	2744	TRINITY_DN25803_c0_g1	5142	NBSLRR	167	4307	jcf7180001889608	0.325	1409	0.625	0.253	0.75	1054	0	0	1246	0.586	0.727	1248	0.283	0.583	1785	1124	0.372	0.194	0.376	0.016	As548_TRINITY_DN10906_c2_g1	0	NBSLRR	71	727	0.3	0	0.455	chr6B	696302711	74485	388	9.3e-39	169	NA	NA	NA	NA
TRINITY_DN25803_c0_g1_i7	3579	2	NBSLRR	258	2744	TRINITY_DN25803_c0_g1	5142	NBSLRR	1389	4307	jcf7180001889608	0.325	1409	0.625	0.253	0.75	1054	0	0	1246	0.586	0.727	1248	0.283	0.583	1785	1124	0.372	0.194	0.376	0.016	As548_TRINITY_DN10906_c2_g1	0	NBSLRR	71	727	0.3	0	0.455	chr6B	696302711	74485	388	9.3e-39	169	NA	NA	NA	NA
TRINITY_DN25868_c0_g1_i4	794	2	NA	NA	NA	TRINITY_DN25868_c0_g1	1311	NA	NA	NA	jcf7180001924274	0.488	0	0.591	0	0.781	0.217	0.823	0.814	0.166	0	0.323	0.587	0.499	0.621	0.729	1.03	0.541	0.499	0	1012	As548_TRINITY_DN75454_c0_g1	7.32e-33	NA	NA	NA	0	0	8877	chr6S	784920929	89826	344	7.49e-119	433	chr6S	784921469	95455	264
TRINITY_DN2587_c0_g1_i4	974	2	NA	NA	NA	TRINITY_DN2587_c0_g1	1306	NA	NA	NA	jcf7180001899979	0.813	1168	4135	2335	2666	5188	0	1.45	4902	0	1464	3562	1036	1522	4961	1373	0.323	5522	0.344	0	As548_TRINITY_DN24413_c0_g1	1.53e-49	NA	NA	NA	0	0	6191	chr6B	149020986	97561	287	1.21e-136	492	chr6B	558917692	89504	343
TRINITY_DN26048_c0_g1_i2	253	2	NA	NA	NA	TRINITY_DN26048_c0_g1	253	NA	NA	NA	NA	5.65	26194	4865	0	5961	1054	0	37719	2586	0	41714	0	18671	31376	4741	22849	17489	0	16.68	7968	As548_TRINITY_DN21352_c0_g1	8.97e-120	NA	NA	NA	16463	17602	3.38	NA	NA	NA	NA	NA	NA	NA	NA	NA	NA
TRINITY_DN2611_c0_g1_i6	2688	2	NA	NA	NA	TRINITY_DN2611_c0_g1	4570	NA	NA	NA	jcf7180001890087	1003	2023	0.371	0.505	1014	0.455	0	3184	0.374	0	1796	0.448	1476	3657	0.202	2383	3041	0	0.731	0.743	As548_TRINITY_DN7785_c0_g1	0	NA	NA	NA	31587	25791	6134	chr6B	474436305	97.16	1162	0	1941	NA	NA	NA	NA
TRINITY_DN2611_c0_g1_i8	1496	2	NA	NA	NA	TRINITY_DN2611_c0_g1	4570	NA	NA	NA	jcf7180001643023	0	0.53	0.371	1143	0.466	0.548	3026	0	0.301	0	0	0.768	0	0	1027	0	1159	0	0	1439	As548_TRINITY_DN7785_c0_g1	0	NA	NA	NA	31587	25791	6134	chr6B	474436305	97.16	1162	0	1941	NA	NA	NA	NA
TRINITY_DN2620_c0_g1_i9	2778	2	NA	NA	NA	TRINITY_DN2620_c0_g1	3864	NA	NA	NA	NA	0.366	1578	0.788	0.493	0.953	1964	0	1079	1579	1279	0.997	1632	0.86	1408	1257	0.166	0.695	0	0.064	0	As548_TRINITY_DN1621_c0_g1	0	NA	NA	NA	12707	9623	7727	NA	NA	NA	NA	NA	NA	NA	NA	NA	NA
TRINITY_DN2622_c0_g1_i5	6876	2	NA	NA	NA	TRINITY_DN2622_c0_g1	7255	NA	NA	NA	jcf7180001936676	0.312	1204	0	0	2.24	0.186	0	0	0.789	0	1724	1344	0.606	0.628	0.883	0.905	1.84	0	0.064	0	As548_TRINITY_DN55_c3_g1	0	NA	NA	NA	3636	7618	5212	chr6S	799175990	97878	3111	0	5376	chr6S	799177679	98442	770
TRINITY_DN26390_c0_g1_i4	1502	2	NA	NA	NA	TRINITY_DN26390_c0_g1	2444	NA	NA	NA	jcf7180001608285	0	0.145	0.151	0	0.172	0.186	0	0	0.467	0	0	0.363	0.43	0.28	0.509	0	0.457	0.815	0.215	0.443	As548_TRINITY_DN16305_c0_g1	0	NA	NA	NA	1099	0.906	1616	NA	NA	NA	NA	NA	NA	NA	NA	NA	NA
TRINITY_DN2641_c0_g1_i2	729	2	NA	NA	NA	TRINITY_DN2641_c0_g1	4565	NA	NA	NA	NA	0.61	0.831	0.66	0	0	0.455	0	0	0.332	0.77	0.44	0.224	0.929	0.182	0.441	0	0.955	1498	0.516	0	As548_TRINITY_DN9582_c0_g1	0	NA	NA	NA	0.979	0.818	0.58	chr6B	14682767	94223	1056	0	1580	chr6B	14683534	94191	723
TRINITY_DN2655_c0_g1_i15	1626	2	NA	NA	NA	TRINITY_DN2655_c0_g1	2978	NA	NA	NA	jcf7180001526258	0.434	2457	0.776	0.963	2575	1561	0	1415	0.924	3329	0	1557	1007	2733	0.729	0.125	1082	5471	0	2704	As548_TRINITY_DN5015_c0_g1	0	NA	NA	NA	4665	12746	13531	chr6B	341738576	82278	395	6.51e-83	315	chr6B	582390943	86822	258
TRINITY_DN2656_c0_g1_i6	2117	2	NA	NA	NA	TRINITY_DN2656_c0_g1	3657	NA	NA	NA	NA	0	0.542	0	0	0	0	0	0	0.758	0	0	0.672	0	2324	0.24	0.364	0	0	0.183	1668	As548_TRINITY_DN82778_c0_g1	0	NA	NA	NA	14954	10723	7989	NA	NA	NA	NA	NA	NA	NA	NA	NA	NA
TRINITY_DN2668_c2_g1_i2	594	2	NA	NA	NA	TRINITY_DN2668_c2_g1	1152	NA	NA	NA	NA	0.23	2445	0.672	6.62	2027	1127	0	1893	0.82	1.93	4301	0.992	2414	2188	0.758	1238	1805	1019	0.871	1344	As548_TRINITY_DN6641_c0_g2	0	NA	NA	NA	4905	4794	4871	NA	NA	NA	NA	NA	NA	NA	NA	NA	NA
TRINITY_DN2685_c0_g1_i23	1228	2	NA	NA	NA	TRINITY_DN2685_c0_g1	5040	NA	NA	NA	NA	0.976	1.65	0.255	0.518	1815	1282	0	0.256	1236	2266	2146	1653	2933	1.56	1104	1186	2999	0.723	0.935	1004	As548_TRINITY_DN718_c0_g1	0	NA	NA	NA	32426	32019	21406	NA	NA	NA	NA	NA	NA	NA	NA	NA	NA
TRINITY_DN2689_c0_g1_i6	1986	2	NA	NA	NA	TRINITY_DN2689_c0_g1	3126	NA	NA	NA	NA	0.596	1819	0.486	0	4602	0	0	3.9	0	0	4821	0	1046	2491	0	1051	4235	1375	2042	0	As548_TRINITY_DN16253_c0_g1	7.48e-96	NA	NA	NA	5914	1944	4746	NA	NA	NA	NA	NA	NA	NA	NA	NA	NA
TRINITY_DN26988_c0_g1_i1	315	2	NA	NA	NA	TRINITY_DN26988_c0_g1	429	NA	NA	NA	NA	0	4408	0	0	0	0	0	0	0	0	0	0	0	0	0	0	0	0	0	0	As548_TRINITY_DN10775_c0_g1	1.76e-44	NA	NA	NA	5025	1073	0	NA	NA	NA	NA	NA	NA	NA	NA	NA	NA
TRINITY_DN26998_c0_g1_i14	2255	2	NA	NA	NA	TRINITY_DN26998_c0_g1	3184	NA	NA	NA	jcf7180001923250	0	0	0.116	0	0.243	0.403	0	0	0	0.531	0	0	0	0	0.48	0	0	0	0	0	As548_TRINITY_DN4645_c0_g1	4.13e-168	NA	NA	NA	14695	2551	6544	chr6S	181507250	85.61	549	1.35e-159	569	chr6S	5506729	89524	420
TRINITY_DN2701_c0_g1_i13	5006	2	NA	NA	NA	TRINITY_DN2701_c0_g1	8441	NA	NA	NA	jcf7180001750157	0.081	0.614	0.741	0	0.466	1.24	0.245	0.442	0.987	0.499	0.395	1344	0.547	0.477	1.42	0.343	0.611	0.509	0.269	0.538	As548_TRINITY_DN4098_c0_g1	0	NA	NA	NA	0.479	1372	2504	NA	NA	NA	NA	NA	NA	NA	NA	NA	NA
TRINITY_DN2701_c0_g1_i39	2497	2	NA	NA	NA	TRINITY_DN2701_c0_g1	8441	NA	NA	NA	jcf7180001750157	0	0	1239	0	0	1044	0	0.504	1.08	0.141	0	0.811	0.117	0.575	1583	0.76	0.435	0	0	0.893	As548_TRINITY_DN4098_c0_g1	0	NA	NA	NA	0.479	1372	2504	NA	NA	NA	NA	NA	NA	NA	NA	NA	NA
TRINITY_DN27033_c0_g2_i1	237	2	NA	NA	NA	TRINITY_DN27033_c0_g2	237	NA	NA	NA	NA	0	21172	0	0	0	0	0	0	9399	0	0	0	0	0	0	0	0	0	0	0	As548_TRINITY_DN44649_c0_g1	6.87e-76	NA	NA	NA	0	0	13656	chr6B	124903910	91549	71	5.06e-19	99	NA	NA	NA	NA
TRINITY_DN2704_c0_g1_i12	1628	2	NA	NA	NA	TRINITY_DN2704_c0_g1	4593	NA	NA	NA	jcf7180001527126	1328	3264	0.313	1541	7.4	0	0.774	2715	0	3242	3286	0.576	2082	4.99	0.528	1342	6623	0.611	1161	0	As548_TRINITY_DN9952_c0_g2	4.7e-154	NA	NA	NA	12257	10952	7.17	NA	NA	NA	NA	NA	NA	NA	NA	NA	NA
TRINITY_DN2704_c0_g1_i27	1914	2	NA	NA	NA	TRINITY_DN2704_c0_g1	4593	NA	NA	NA	NA	0.976	3456	0	0.951	1024	0.248	0	3325	0.384	1182	2227	0.117	0.616	4066	0.912	2081	4299	0	2203	0	As548_TRINITY_DN9952_c0_g2	4.7e-154	NA	NA	NA	12257	10952	7.17	NA	NA	NA	NA	NA	NA	NA	NA	NA	NA
TRINITY_DN2704_c0_g1_i6	2037	2	NA	NA	NA	TRINITY_DN2704_c0_g1	4593	NA	NA	NA	NA	0	0.795	0	0	0	0	0	0.035	0	0	0	0	0	0.053	0.01	0.01	0.077	1233	0	0	As548_TRINITY_DN9952_c0_g2	4.7e-154	NA	NA	NA	12257	10952	7.17	NA	NA	NA	NA	NA	NA	NA	NA	NA	NA
TRINITY_DN2713_c0_g1_i2	988	2	NA	NA	NA	TRINITY_DN2713_c0_g1	4486	NA	NA	NA	jcf7180001527187	0	1216	0.903	0	1125	3328	0	1795	2326	0.911	2442	2.4	0.694	0.78	1679	0.323	1784	2272	0	0	As548_TRINITY_DN259_c0_g1	0	NA	NA	NA	18611	8858	26459	chr6B	492190361	98783	904	0	1607	chr6B	492191571	87229	783
TRINITY_DN271_c0_g1_i21	808	2	NA	NA	NA	TRINITY_DN271_c0_g1	2613	NA	NA	NA	NA	0	0	4494	0	0	4093	1792	0.292	2337	0	0.171	1354	0.821	0	3666	0.583	0.302	0	0.473	0	As548_TRINITY_DN9988_c0_g1	4.93e-82	NA	NA	NA	3826	4187	16501	NA	NA	NA	NA	NA	NA	NA	NA	NA	NA
TRINITY_DN271_c0_g1_i22	918	2	NA	NA	NA	TRINITY_DN271_c0_g1	2613	NA	NA	NA	NA	0	0.578	8734	0.469	0	2976	0	0.654	4549	0.564	0.521	2943	0.518	0.061	14932	0	1103	3301	0	0	As548_TRINITY_DN9988_c0_g1	4.93e-82	NA	NA	NA	3826	4187	16501	NA	NA	NA	NA	NA	NA	NA	NA	NA	NA
TRINITY_DN2723_c0_g1_i15	1397	2	NA	NA	NA	TRINITY_DN2723_c0_g1	1702	NA	NA	NA	NA	0	0.048	1726	0	0.405	0.062	0.46	0	0.395	0.358	0	0.203	0	0.75	1353	0.51	0.407	0	0	0	As548_TRINITY_DN35961_c0_g1	1.06e-136	NA	NA	NA	0	0.651	1423	NA	NA	NA	NA	NA	NA	NA	NA	NA	NA
TRINITY_DN27284_c0_g1_i12	1822	2	NA	NA	NA	TRINITY_DN27284_c0_g1	3528	NA	NA	NA	jcf7180001713269	0.894	1.12	0.521	0.698	0.537	0.93	0.656	0.327	0.955	1193	0.44	0.512	1398	1.06	0.796	1478	1285	0.958	0.247	0	As548_TRINITY_DN2437_c0_g1	0	NA	NA	NA	0.789	0.968	0.467	chr6S	704414435	92601	446	4.04e-180	638	chr6S	190188538	94203	414
TRINITY_DN27320_c0_g1_i1	368	2	NA	NA	NA	TRINITY_DN27320_c0_g1	368	NA	NA	NA	NA	0	0.927	0	0	0	0	0	0	0	0	0	0.448	0	0	0.144	0	0.274	0	0	0	As548_TRINITY_DN46566_c0_g1	3.12e-66	NA	NA	NA	0	0	5144	NA	NA	NA	NA	NA	NA	NA	NA	NA	NA
TRINITY_DN27364_c0_g1_i7	907	2	NA	NA	NA	TRINITY_DN27364_c0_g1	1666	NA	NA	NA	NA	1396	3384	0.486	0	2017	0.682	1381	2467	0.488	0.26	3654	0.736	2414	3044	1631	3122	2325	0.255	0	1051	As548_TRINITY_DN1172_c0_g3	8.33e-113	NA	NA	NA	65142	35.52	28359	NA	NA	NA	NA	NA	NA	NA	NA	NA	NA
TRINITY_DN2737_c0_g1_i2	896	2	NA	NA	NA	TRINITY_DN2737_c0_g1	1056	NA	NA	NA	NA	1.45	2637	1541	2.07	0	0.765	0.911	3281	0.987	0.477	1293	0.416	1281	3619	1353	2341	3.09	0.795	5428	2158	As548_TRINITY_DN5666_c0_g1	0	NA	NA	NA	7902	8154	5019	NA	NA	NA	NA	NA	NA	NA	NA	NA	NA
TRINITY_DN27408_c0_g1_i2	1194	2	NA	NA	NA	TRINITY_DN27408_c0_g1	1889	NA	NA	NA	NA	0	0.193	0	0	0	0.072	0	0	0	0.499	0.377	0	0.674	0.984	0.441	0	0	0	0	0.427	As548_TRINITY_DN5138_c0_g1	0	NA	NA	NA	5654	5656	9104	NA	NA	NA	NA	NA	NA	NA	NA	NA	NA
TRINITY_DN27436_c0_g2_i2	1165	2	NA	NA	NA	TRINITY_DN27436_c0_g2	1419	NA	NA	NA	NA	0.257	0	1042	0	0.314	0.455	0	0	0	0	0.826	0.619	0.802	0.386	0.653	0.551	0.702	0.102	0	0	As548_TRINITY_DN92688_c0_g1	0	NA	NA	NA	0.16	0.413	0.649	NA	NA	NA	NA	NA	NA	NA	NA	NA	NA
TRINITY_DN27468_c0_g1_i9	2332	2	NA	NA	NA	TRINITY_DN27468_c0_g1	2637	NA	NA	NA	jcf7180001828308	0	0	0.301	0	0	0.083	0	0	0	0	0	0.416	0	0	0.154	0	0	0	0	0	As548_TRINITY_DN13255_c0_g1	0	NA	NA	NA	0.42	0.695	2185	chr6B	125017766	96939	98	2.21e-37	163	chr6B	159092821	94231	104
TRINITY_DN2747_c0_g1_i11	5221	2	NA	NA	NA	TRINITY_DN2747_c0_g1	6013	NA	NA	NA	NA	2181	7924	3568	0	2646	3121	0	4793	4289	3394	1329	3605	2014	5747	5182	5.65	5465	6164	0.516	4119	As548_TRINITY_DN2583_c1_g1	0	NA	NA	NA	19649	21762	17139	NA	NA	NA	NA	NA	NA	NA	NA	NA	NA
TRINITY_DN2756_c0_g1_i14	1767	2	NA	NA	NA	TRINITY_DN2756_c0_g1	2261	NA	NA	NA	NA	1.49	2409	1413	1312	1754	1426	5611	0.133	2316	0.878	0.745	1344	2063	0.931	1267	2861	1917	2598	2999	1138	As548_TRINITY_DN11070_c0_g1	0	NA	NA	NA	34814	14558	29702	NA	NA	NA	NA	NA	NA	NA	NA	NA	NA
TRINITY_DN2757_c0_g1_i16	1554	2	NA	NA	NA	TRINITY_DN2757_c0_g1	4399	NA	NA	NA	NA	0.772	0.927	0.44	0.457	1358	0.909	3036	2317	0.499	1073	1.76	0.544	0.811	1605	0.451	1446	2325	0.774	0.333	0	As548_TRINITY_DN4272_c0_g1	0	NA	NA	NA	6223	4504	22191	NA	NA	NA	NA	NA	NA	NA	NA	NA	NA
TRINITY_DN2757_c0_g1_i19	3753	2	NA	NA	NA	TRINITY_DN2757_c0_g1	4399	NA	NA	NA	NA	0.095	0.554	2236	0.289	0.182	2387	0	0.31	3292	0	0.126	2272	1.32	0	2178	0.239	0	0	0	0	As548_TRINITY_DN4272_c0_g1	0	NA	NA	NA	6223	4504	22191	NA	NA	NA	NA	NA	NA	NA	NA	NA	NA
TRINITY_DN2757_c0_g1_i23	3707	2	NA	NA	NA	TRINITY_DN2757_c0_g1	4399	NA	NA	NA	NA	0.217	0.783	1.1	0.253	0.933	1.85	0	0	0	1334	0.844	0.821	0.088	0	1257	0.593	0	1141	0.505	0.893	As548_TRINITY_DN4272_c0_g1	0	NA	NA	NA	6223	4504	22191	NA	NA	NA	NA	NA	NA	NA	NA	NA	NA
TRINITY_DN275_c0_g1_i10	3960	2	NBSLRR	191	3560	TRINITY_DN275_c0_g1	6933	NBSLRR	191	5739	jcf7180001624151	0.095	1397	2085	0.421	0.993	0.961	0.157	0.292	1859	0.499	1095	1834	0.929	0.765	2121	0.645	1742	0.734	0.14	0.142	As548_TRINITY_DN7556_c0_g1	0	NBSLRR	221	5651	4895	4724	8683	NA	NA	NA	NA	NA	NA	NA	NA	NA	NA
TRINITY_DN275_c0_g1_i10	3960	2	NBSLRR	191	3560	TRINITY_DN275_c0_g1	6933	NBSLRR	191	5739	jcf7180001624151	0.095	1397	2085	0.421	0.993	0.961	0.157	0.292	1859	0.499	1095	1834	0.929	0.765	2121	0.645	1742	0.734	0.14	0.142	As548_TRINITY_DN7556_c0_g1	0	NBSLRR	221	5651	4895	4724	8683	NA	NA	NA	NA	NA	NA	NA	NA	NA	NA
TRINITY_DN275_c0_g1_i3	3960	2	NBSLRR	191	3560	TRINITY_DN275_c0_g1	6933	NBSLRR	191	5739	jcf7180001671279	0.054	0.482	0.834	0.493	0.243	0.63	0	0.115	1433	0.575	0.108	0.981	0.049	0.098	1152	0.198	0.681	1538	0.193	0.142	As548_TRINITY_DN7556_c0_g1	0	NBSLRR	221	5651	4895	4724	8683	NA	NA	NA	NA	NA	NA	NA	NA	NA	NA
TRINITY_DN275_c0_g1_i3	3960	2	NBSLRR	191	3560	TRINITY_DN275_c0_g1	6933	NBSLRR	191	5739	jcf7180001671279	0.054	0.482	0.834	0.493	0.243	0.63	0	0.115	1433	0.575	0.108	0.981	0.049	0.098	1152	0.198	0.681	1538	0.193	0.142	As548_TRINITY_DN7556_c0_g1	0	NBSLRR	221	5651	4895	4724	8683	NA	NA	NA	NA	NA	NA	NA	NA	NA	NA
TRINITY_DN275_c0_g1_i6	4020	2	NBSLRR	191	3321	TRINITY_DN275_c0_g1	6933	NBSLRR	191	5739	jcf7180001624151	0.772	2.77	1517	0.758	1632	0.847	0.588	1282	1392	1301	1.58	1216	2219	3066	1535	1.53	2156	0.204	0.312	1036	As548_TRINITY_DN7556_c0_g1	0	NBSLRR	221	5651	4895	4724	8683	NA	NA	NA	NA	NA	NA	NA	NA	NA	NA
TRINITY_DN275_c0_g1_i6	4020	2	NBSLRR	191	3321	TRINITY_DN275_c0_g1	6933	NBSLRR	191	5739	jcf7180001624151	0.772	2.77	1517	0.758	1632	0.847	0.588	1282	1392	1301	1.58	1216	2219	3066	1535	1.53	2156	0.204	0.312	1036	As548_TRINITY_DN7556_c0_g1	0	NBSLRR	221	5651	4895	4724	8683	NA	NA	NA	NA	NA	NA	NA	NA	NA	NA
TRINITY_DN2760_c0_g1_i1	3565	2	NA	NA	NA	TRINITY_DN2760_c0_g1	4406	NA	NA	NA	NA	0.285	0.397	2317	0	0.466	4186	0	0.133	3407	1073	0.611	3989	2356	1.09	2361	1498	0.611	1651	0	0.316	As548_TRINITY_DN2664_c0_g1	0	NA	NA	NA	8062	4301	13372	NA	NA	NA	NA	NA	NA	NA	NA	NA	NA
TRINITY_DN27656_c0_g1_i2	231	2	NA	NA	NA	TRINITY_DN27656_c0_g1	370	NA	NA	NA	jcf7180001864226	0	29578	0	0	60498	0	0	51444	6076	0	0	0	20997	0	0	0	36699	31126	0	0	As548_TRINITY_DN34834_c0_g1	3.09e-76	NA	NA	NA	8851	0	12.86	chr6B	450083355	85906	149	4.85e-36	156	chr6B	678777842	82993	147
TRINITY_DN276_c0_g1_i10	2972	2	NA	NA	NA	TRINITY_DN276_c0_g1	4021	NA	NA	NA	jcf7180001892208	3469	3998	4459	3779	3153	5446	3623	3538	6346	3969	3.43	6452	5376	2.68	5345	5275	5001	5543	5524	3961	As548_TRINITY_DN1843_c0_g1	0	NA	NA	NA	19659	23592	29941	chr6S	143890336	96479	142	7.06e-59	235	chr6S	143891009	95968	124
TRINITY_DN2775_c0_g1_i1	4236	2	NA	NA	NA	TRINITY_DN2775_c0_g1	4508	NA	NA	NA	NA	0.528	3312	1019	0.385	1439	0.971	1067	0.982	1672	1919	1948	1312	1584	2627	1583	2622	2086	1854	0.107	1597	As548_TRINITY_DN4949_c0_g1	0	NA	NA	NA	4545	4.97	6339	NA	NA	NA	NA	NA	NA	NA	NA	NA	NA
TRINITY_DN27805_c0_g1_i6	1804	2	NA	NA	NA	TRINITY_DN27805_c0_g1	3360	NA	NA	NA	jcf7180001533849	0	0	1703	0	0.112	0.289	0	0	0.852	0.098	0	0.811	0	0	0.979	0.135	0	1202	0	0	As548_TRINITY_DN24131_c0_g1	1.3e-118	NA	NA	NA	0	0.537	0.819	chr6B	712232590	88271	827	0	959	chr6B	712231464	89414	444
TRINITY_DN2783_c0_g1_i3	2072	2	NA	NA	NA	TRINITY_DN2783_c0_g1	5664	NA	NA	NA	NA	4404	0.915	6429	0.734	2595	7658	2115	1035	5619	6029	1374	11902	7331	2408	13588	4703	0	3.8	8.19	1083	As548_TRINITY_DN961_c0_g1	0	NA	NA	NA	40907	48407	28689	NA	NA	NA	NA	NA	NA	NA	NA	NA	NA
TRINITY_DN27868_c0_g1_i4	587	2	NA	NA	NA	TRINITY_DN27868_c0_g1	1816	NA	NA	NA	jcf7180001529371	0	0.337	0	0	1419	0.455	0	0	0	0	0	0.661	0.489	0.197	0	0.187	0.442	0	0	0	As548_TRINITY_DN3707_c0_g1	9.48e-83	NA	NA	NA	14355	21331	3824	chr6B	395675417	98204	167	1.85e-76	292	chr6B	395675251	95238	63
TRINITY_DN27930_c0_g1_i2	316	2	NA	NA	NA	TRINITY_DN27930_c0_g1	394	NA	NA	NA	NA	0	1891	0	0	0	0	0	0	0	0	4525	0	0.762	4687	0	0.572	1552	0	0	0	As548_TRINITY_DN988_c0_g2	1.23e-50	NA	NA	NA	84961	47474	22578	NA	NA	NA	NA	NA	NA	NA	NA	NA	NA
TRINITY_DN27959_c0_g3_i2	473	2	NA	NA	NA	TRINITY_DN27959_c0_g3	555	NA	NA	NA	NA	0	0.783	2178	4778	0	0.992	0	0.416	0.509	0	0.458	1152	0.411	0	1.18	0	0.962	0	0	0	As548_TRINITY_DN10270_c0_g1	1.02e-77	NA	NA	NA	0	0	2253	NA	NA	NA	NA	NA	NA	NA	NA	NA	NA
TRINITY_DN2812_c0_g2_i2	1814	2	NA	NA	NA	TRINITY_DN2812_c0_g2	1826	NA	NA	NA	jcf7180001767001	0.366	2854	2108	0.939	6934	2615	0	4891	2306	1.93	2972	4245	1251	3748	3435	1.29	2058	3291	1773	4261	As548_TRINITY_DN8495_c0_g1	0	NA	NA	NA	3516	5674	4.7	NA	NA	NA	NA	NA	NA	NA	NA	NA	NA
TRINITY_DN28139_c0_g1_i2	911	2	NA	NA	NA	TRINITY_DN28139_c0_g1	1129	NA	NA	NA	jcf7180001538689	0	0.253	0.058	0	0.162	0.176	0	0	0	0	0.189	0.171	0	0.235	0.096	0.239	0.281	0	0	0	As548_TRINITY_DN3498_c0_g3	0	NA	NA	NA	2318	4398	2549	chr6S	66106181	96486	313	2.23e-143	514	chr6S	66106527	93778	225
TRINITY_DN2814_c0_g1_i10	2090	2	NA	NA	NA	TRINITY_DN2814_c0_g1	3653	NA	NA	NA	jcf7180001648425	0.339	0.301	2085	0	1135	0.372	1528	0.071	1516	0	0.045	0.704	1281	0.227	1478	0.603	0.225	2547	0	0	As548_TRINITY_DN7100_c0_g1	0	NA	NA	NA	3916	3712	11676	NA	NA	NA	NA	NA	NA	NA	NA	NA	NA
TRINITY_DN2817_c0_g1_i8	5787	2	NA	NA	NA	TRINITY_DN2817_c0_g1	7051	NA	NA	NA	NA	0.434	0.795	0.892	0	0.101	0.765	0	0.805	0.82	0.629	0.503	0.597	0.821	0.795	0.47	1155	1236	0	0	0.933	As548_TRINITY_DN2191_c0_g1	0	NA	NA	NA	3856	4583	4006	NA	NA	NA	NA	NA	NA	NA	NA	NA	NA
TRINITY_DN2821_c0_g1_i6	494	2	NA	NA	NA	TRINITY_DN2821_c0_g1	2678	NA	NA	NA	NA	7913	13019	12996	13239	13.32	8826	18224	13239	13782	16341	28022	11529	18289	23085	8.09	18448	32899	12614	8458	15605	As548_TRINITY_DN422_c0_g1	8.16e-105	NA	NA	NA	256921	182587	36235	chr6S	694719431	96581	117	7.95e-47	195	chr6S	694719997	90	140
TRINITY_DN28249_c0_g1_i9	401	2	NA	NA	NA	TRINITY_DN28249_c0_g1	1926	NA	NA	NA	jcf7180001915399	0.705	0	0.88	0	0	0.94	0	0	0.384	0	0	0	1427	0	0.115	0	0	0	0	0	As548_TRINITY_DN2330_c0_g1	6.19e-65	NA	NA	NA	10199	9491	16706	chr6B	159804460	99635	274	3e-139	501	chr6B	503881634	95.05	303
TRINITY_DN28271_c0_g1_i1	1764	2	NA	NA	NA	TRINITY_DN28271_c0_g1	1764	NA	NA	NA	NA	0.298	0.795	1158	0	0.203	0.951	0	0.31	1028	0.26	0.081	1002	0.479	0.575	1.19	0.52	0.33	0.734	0.398	0.451	As548_TRINITY_DN7287_c0_g2	0	NA	NA	NA	1658	1152	3494	NA	NA	NA	NA	NA	NA	NA	NA	NA	NA
TRINITY_DN28282_c0_g3_i2	909	2	NA	NA	NA	TRINITY_DN28282_c0_g3	979	NA	NA	NA	NA	0.366	0.578	0.753	0	1075	1189	0	0	1091	1008	0.485	1482	1369	0.992	0.969	0.541	0.197	1447	0	0	As548_TRINITY_DN1108_c0_g1	0	NA	NA	NA	2328	1619	6327	NA	NA	NA	NA	NA	NA	NA	NA	NA	NA
TRINITY_DN28419_c1_g1_i4	937	2	NA	NA	NA	TRINITY_DN28419_c1_g1	2117	NA	NA	NA	NA	0.122	0.686	0.533	0	0.426	0.816	0.02	1663	1018	0.889	0	0.587	0.225	0	1439	1696	0.14	0	0	0	As548_TRINITY_DN1826_c4_g1	3.69e-137	NA	NA	NA	2947	1689	3186	chr6B	439390922	91133	203	3.64e-69	268	chr6B	439390506	89286	196
TRINITY_DN2842_c0_g1_i3	2276	2	NA	NA	NA	TRINITY_DN2842_c0_g1	3064	NA	NA	NA	jcf7180001936557	2967	3709	1483	2287	2159	1127	0	4.44	0.8	2.7	3457	1344	1887	1825	1718	1862	4228	1396	5116	3715	As548_TRINITY_DN50544_c0_g1	0	NA	NA	NA	0.499	1231	0.854	chr6B	96106883	92265	181	4.12e-65	255	chr6B	219823183	92265	181
TRINITY_DN2849_c0_g2_i3	755	2	NA	NA	NA	TRINITY_DN2849_c0_g2	941	NA	NA	NA	jcf7180001893776	0	0	8247	0.542	1926	9725	0	0.478	7062	3329	0.835	12051	1378	0.485	7773	0.572	0.204	5115	4761	1043	As548_TRINITY_DN4659_c1_g1	2.88e-90	NA	NA	NA	9.86	17945	23386	chr6B	50484674	85816	564	3.01e-161	573	chr6B	50484135	97516	161
TRINITY_DN2853_c0_g1_i10	2403	2	NA	NA	NA	TRINITY_DN2853_c0_g1	3226	NA	NA	NA	jcf7180001552270	0.677	2926	1239	0	4187	0.496	0.803	4.51	0.634	0.455	3367	0.587	0.684	1749	1161	1228	2191	0.764	2784	3383	As548_TRINITY_DN4936_c0_g3	0	NA	NA	NA	2118	3738	2731	NA	NA	NA	NA	NA	NA	NA	NA	NA	NA
TRINITY_DN28560_c0_g1_i8	232	2	NA	NA	NA	TRINITY_DN28560_c0_g1	879	NA	NA	NA	NA	0	18835	0	0	24775	0	0	15371	0	0	0	0	0	0	0	11664	0	0	0	0	As548_TRINITY_DN31974_c0_g1	0	NA	NA	NA	282974	1127767	390.66	NA	NA	NA	NA	NA	NA	NA	NA	NA	NA
TRINITY_DN28567_c2_g1_i1	620	2	NA	NA	NA	TRINITY_DN28567_c2_g1	620	NA	NA	NA	jcf7180001921740	0.908	0	1239	0	0.294	0.186	0	0.292	0.156	3231	0.575	0	0.606	1015	0	0	0.759	0	0	1929	As548_TRINITY_DN32301_c0_g1	0	NA	NA	NA	3067	8216	3755	chr6S	674432840	96774	62	3.08e-20	104	chr6S	674433316	96774	62
TRINITY_DN2857_c0_g1_i22	543	2	NA	NA	NA	TRINITY_DN2857_c0_g1	2448	NA	NA	NA	NA	1789	2264	0.162	0	0.689	0.951	2899	0.398	0.509	0	0	0.779	2336	1295	1027	1051	0.822	0	0	1.13	As548_TRINITY_DN1712_c1_g1	0	NA	NA	NA	4186	2621	2868	NA	NA	NA	NA	NA	NA	NA	NA	NA	NA
TRINITY_DN2864_c0_g1_i15	1307	2	NA	NA	NA	TRINITY_DN2864_c0_g1	3631	NA	NA	NA	jcf7180001893067	1978	3529	3035	5368	1368	2108	1067	0.433	3677	3643	0.646	4074	4506	0.84	4021	3101	0	9149	2655	0.538	As548_TRINITY_DN1654_c0_g1	0	NA	NA	NA	85091	133723	179284	chr6B	572393472	95991	449	0	728	chr6B	572393022	98026	304
TRINITY_DN2869_c0_g1_i12	1161	2	NA	NA	NA	TRINITY_DN2869_c0_g1	2419	NA	NA	NA	NA	0	2168	1784	0	0	0.217	4514	0	0	0	3843	0	0.43	0.477	1737	0	1103	6561	1	7557	As548_TRINITY_DN20376_c0_g1	0	NA	NA	NA	4425	11145	10436	chr6B	615284746	97487	199	8.71e-91	340	chr6B	626181190	97.03	202
TRINITY_DN2877_c0_g1_i20	2241	2	NA	NA	NA	TRINITY_DN2877_c0_g1	4630	NA	NA	NA	NA	0	0.771	0.151	0	0.243	0.393	0	0	0.187	0	0.62	0.587	0.293	0.348	0.355	0.042	0.211	0	0	0	As548_TRINITY_DN1586_c0_g1	0	NA	NA	NA	1598	1.97	1.65	NA	NA	NA	NA	NA	NA	NA	NA	NA	NA
TRINITY_DN28786_c0_g1_i6	769	2	NA	NA	NA	TRINITY_DN28786_c0_g1	1759	NA	NA	NA	NA	0.257	0	0.741	0	0.821	0.62	0.656	0.61	0.955	1486	0	0	0	0.598	0.441	0.489	0	1518	0	2538	As548_TRINITY_DN13609_c0_g1	0	NA	NA	NA	1508	2366	4165	NA	NA	NA	NA	NA	NA	NA	NA	NA	NA
TRINITY_DN2887_c0_g1_i3	2293	2	NA	NA	NA	TRINITY_DN2887_c0_g1	2802	NA	NA	NA	NA	1301	0.975	1494	0.144	1825	1406	0	1309	1984	0.987	0.943	2282	1701	1704	1.43	1571	1875	2466	0.892	4032	As548_TRINITY_DN4052_c0_g1	0	NA	NA	NA	9.12	9966	12666	NA	NA	NA	NA	NA	NA	NA	NA	NA	NA
TRINITY_DN28883_c1_g1_i1	1538	2	NA	NA	NA	TRINITY_DN28883_c1_g1	1538	NA	NA	NA	NA	0.406	0.169	0.753	0	0.628	0.413	0	0.159	0.509	0	0.162	0.48	0.704	0.114	0.547	0.458	0.281	0	0.118	0.538	As548_TRINITY_DN22988_c0_g1	5.74e-139	NA	NA	NA	0	0	0.694	NA	NA	NA	NA	NA	NA	NA	NA	NA	NA
TRINITY_DN28893_c0_g1_i8	2117	2	NA	NA	NA	TRINITY_DN28893_c0_g1	3588	NA	NA	NA	jcf7180001939732	0	0.169	2884	0	0.02	1.54	0	0	3593	0	0	2442	0.459	0	5.22	0.031	0	11472	0	0	As548_TRINITY_DN9994_c0_g3	3.89e-114	NA	NA	NA	0	0.572	0.831	chr6S	788584298	95199	604	0	952	chr6S	788583470	96.39	554
TRINITY_DN28940_c0_g1_i1	673	2	NA	NA	NA	TRINITY_DN28940_c0_g1	1033	NA	NA	NA	NA	0	1036	0.22	0	1227	0.475	0	0.973	0.125	0	0	0.117	0.244	2703	0.499	0.146	0.421	1233	0	1597	As548_TRINITY_DN44293_c0_g1	1.13e-94	NA	NA	NA	0	75939	33401	NA	NA	NA	NA	NA	NA	NA	NA	NA	NA
TRINITY_DN2896_c0_g1_i21	2278	2	NA	NA	NA	TRINITY_DN2896_c0_g1	3292	NA	NA	NA	NA	0	1.65	0.093	0	2798	0	0	1406	0.156	0.206	0.691	0.075	1711	2188	0	1186	1573	0.458	0	1439	As548_TRINITY_DN2376_c1_g1	0	NA	NA	NA	3906	10591	0.899	NA	NA	NA	NA	NA	NA	NA	NA	NA	NA
TRINITY_DN28_c0_g1_i20	3139	2	NA	NA	NA	TRINITY_DN28_c0_g1	4137	NA	NA	NA	NA	2087	3806	1251	0	3812	0.176	0.774	3661	0.602	0.119	2451	0.064	1857	4649	0.672	2424	4481	0	3429	2261	As548_TRINITY_DN6303_c0_g1	0	NA	NA	NA	1578	1108	0.341	NA	NA	NA	NA	NA	NA	NA	NA	NA	NA
TRINITY_DN2900_c0_g4_i2	2025	2	NA	NA	NA	TRINITY_DN2900_c0_g4	2219	NA	NA	NA	jcf7180001526988	6775	16872	3452	11518	35074	1767	12201	44.29	3001	2819	33912	3.53	10762	14333	2.13	11425	54.75	2435	42991	191211	As548_TRINITY_DN4659_c0_g2	0	NA	NA	NA	5424	0.114	3414	chr6S	185924668	79524	840	2.02e-156	558	chr6S	53023791	77651	613
TRINITY_DN2902_c0_g1_i14	2119	2	NA	NA	NA	TRINITY_DN2902_c0_g1	2743	NA	NA	NA	jcf7180001541301	7385	3107	15869	0	0	0	13328	4793	23295	20732	5.63	23708	10489	3.68	10143	15795	3364	10759	6879	5968	As548_TRINITY_DN7222_c0_g1	0	NA	NA	NA	101514	117942	138918	NA	NA	NA	NA	NA	NA	NA	NA	NA	NA
TRINITY_DN2905_c0_g1_i3	1455	2	NA	NA	NA	TRINITY_DN2905_c0_g1	1986	NA	NA	NA	NA	0.894	0.506	5235	0.927	0.436	6201	0.783	0	4102	0	0.126	4223	0.811	0.235	5748	1.55	0.274	3393	0.172	0.838	As548_TRINITY_DN82536_c0_g1	0	NA	NA	NA	4705	3615	21577	NA	NA	NA	NA	NA	NA	NA	NA	NA	NA
TRINITY_DN2909_c0_g1_i2	6370	2	NA	NA	NA	TRINITY_DN2909_c0_g1	8087	NBSLRR	5551	7595	jcf7180001556001	0.718	3517	0.371	0.193	2727	0.186	0.274	1.91	0.478	0.412	1975	0.267	0.987	3536	0.47	1.02	3737	0.662	0.097	1945	As548_TRINITY_DN2525_c0_g1	0	NBSLRR	813	4196	2547	8708	5121	chr6S	785035275	74459	231	1.52e-13	86.1	chr6S	463706318	91304	46
TRINITY_DN2909_c0_g1_i2	6370	2	NA	NA	NA	TRINITY_DN2909_c0_g1	8087	NBSLRR	44	1479	jcf7180001556001	0.718	3517	0.371	0.193	2727	0.186	0.274	1.91	0.478	0.412	1975	0.267	0.987	3536	0.47	1.02	3737	0.662	0.097	1945	As548_TRINITY_DN2525_c0_g1	0	NBSLRR	813	4196	2547	8708	5121	chr6S	785035275	74459	231	1.52e-13	86.1	chr6S	463706318	91304	46
TRINITY_DN2909_c0_g1_i4	6370	2	NA	NA	NA	TRINITY_DN2909_c0_g1	8087	NBSLRR	5551	7595	jcf7180001556001	1341	2421	1019	0.481	1936	0.951	1077	2379	1631	1.41	2442	1066	2.17	3665	1132	2476	2852	0.326	0.086	2.15	As548_TRINITY_DN2525_c0_g1	0	NBSLRR	813	4196	2547	8708	5121	chr6S	785035275	74459	231	1.52e-13	86.1	chr6S	463706318	91304	46
TRINITY_DN2909_c0_g1_i4	6370	2	NA	NA	NA	TRINITY_DN2909_c0_g1	8087	NBSLRR	44	1479	jcf7180001556001	1341	2421	1019	0.481	1936	0.951	1077	2379	1631	1.41	2442	1066	2.17	3665	1132	2476	2852	0.326	0.086	2.15	As548_TRINITY_DN2525_c0_g1	0	NBSLRR	813	4196	2547	8708	5121	chr6S	785035275	74459	231	1.52e-13	86.1	chr6S	463706318	91304	46
TRINITY_DN2909_c0_g1_i6	4459	2	NA	NA	NA	TRINITY_DN2909_c0_g1	8087	NBSLRR	5551	7595	jcf7180001556001	0	2842	0.012	0	1085	0	0.372	1813	0.145	0.488	1832	0	0.762	2143	0.393	0.978	2051	0	0.011	0.664	As548_TRINITY_DN2525_c0_g1	0	NBSLRR	813	4196	2547	8708	5121	chr6S	785035275	74459	231	1.52e-13	86.1	chr6S	463706318	91304	46
TRINITY_DN2909_c0_g1_i6	4459	2	NA	NA	NA	TRINITY_DN2909_c0_g1	8087	NBSLRR	44	1479	jcf7180001556001	0	2842	0.012	0	1085	0	0.372	1813	0.145	0.488	1832	0	0.762	2143	0.393	0.978	2051	0	0.011	0.664	As548_TRINITY_DN2525_c0_g1	0	NBSLRR	813	4196	2547	8708	5121	chr6S	785035275	74459	231	1.52e-13	86.1	chr6S	463706318	91304	46
TRINITY_DN2913_c0_g1_i10	3045	2	NA	NA	NA	TRINITY_DN2913_c0_g1	3997	NA	NA	NA	jcf7180001554283	0	0.253	0.046	0	0.274	0.093	0.02	0	0.114	0	0	0.117	0.371	0.114	0.269	0	0.162	0.275	0	0.158	As548_TRINITY_DN2007_c0_g1	0	NA	NA	NA	2617	4002	3516	NA	NA	NA	NA	NA	NA	NA	NA	NA	NA
TRINITY_DN29153_c0_g1_i2	410	2	NA	NA	NA	TRINITY_DN29153_c0_g1	535	NA	NA	NA	NA	1219	1481	1355	0	1429	0	3809	0.097	0	0	0.763	0.107	0.489	1931	0.211	0.749	1.77	0.336	2461	0	As548_TRINITY_DN59082_c0_g1	9.41e-108	NA	NA	NA	0.589	1.39	0.353	NA	NA	NA	NA	NA	NA	NA	NA	NA	NA
TRINITY_DN29273_c0_g1_i4	1963	2	NA	NA	NA	TRINITY_DN29273_c0_g1	2111	NA	NA	NA	jcf7180001930676	0	0	0.498	0.433	0.547	0.775	0	0	1226	0.737	0	0.608	0.841	0.348	0.537	0.76	0.794	0	0	0	As548_TRINITY_DN99464_c0_g1	1.37e-111	NA	NA	NA	0	20592	0	chr6B	330938221	96.8	1750	0	2892	chr6B	596913010	96.19	105
TRINITY_DN29297_c0_g1_i5	3910	2	NA	NA	NA	TRINITY_DN29297_c0_g1	6205	NA	NA	NA	jcf7180001522977	0.217	0.385	0.892	0.193	0.345	1333	0	0.053	1142	0.423	0.296	1408	0.508	0.257	0.96	0.614	0.063	0.163	0	0	As548_TRINITY_DN43061_c0_g1	0	NA	NA	NA	0.779	0.29	0.296	chr6B	329470743	88639	757	0	913	NA	NA	NA	NA
TRINITY_DN2935_c0_g1_i28	3166	2	NA	NA	NA	TRINITY_DN2935_c0_g1	3480	NA	NA	NA	NA	1748	3143	1274	0	0.963	1075	0.969	1742	1454	0.846	2406	1354	3568	2877	1612	3.08	2325	0.968	2042	1858	As548_TRINITY_DN11484_c0_g2	0	NA	NA	NA	7852	6536	6748	NA	NA	NA	NA	NA	NA	NA	NA	NA	NA
TRINITY_DN2949_c0_g1_i5	2548	2	NA	NA	NA	TRINITY_DN2949_c0_g1	3635	NA	NA	NA	jcf7180001638192	0.827	1072	0.162	0.409	0.132	0.579	0	0.318	0.332	0.683	0.817	0.64	1007	0	0.413	0.51	0.183	0	0.344	0.846	As548_TRINITY_DN5579_c0_g1	0	NA	NA	NA	4116	8462	3516	NA	NA	NA	NA	NA	NA	NA	NA	NA	NA
TRINITY_DN2975_c1_g2_i2	2961	2	NA	NA	NA	TRINITY_DN2975_c1_g2	3038	NA	NA	NA	NA	0.474	2951	2305	2.66	5991	2119	1763	0.92	2482	7579	2747	3029	2219	3316	3387	1686	2711	7.54	0.279	1842	As548_TRINITY_DN3294_c0_g1	0	NA	NA	NA	13296	28764	5292	chr6S	8023479	96	50	7.34e-13	82.4	NA	NA	NA	NA
TRINITY_DN29763_c0_g1_i1	1662	2	NA	NA	NA	TRINITY_DN29763_c0_g1	1662	NA	NA	NA	NA	0.556	0.301	0.846	0.614	0.456	1044	0	0.31	1111	0	0.305	1.13	0.44	0.114	0.816	0.156	0.225	0	0	0.237	As548_TRINITY_DN17343_c0_g1	0	NA	NA	NA	0.21	0.396	1104	NA	NA	NA	NA	NA	NA	NA	NA	NA	NA
TRINITY_DN29780_c1_g1_i2	285	2	NA	NA	NA	TRINITY_DN29780_c1_g1	396	NA	NA	NA	NA	0	0	0.961	0	0	1809	0	0	0	0	4489	3615	3148	0	0.489	0	0	0	0	0	As548_TRINITY_DN41386_c0_g1	1.92e-103	NA	NA	NA	0	0	2435	NA	NA	NA	NA	NA	NA	NA	NA	NA	NA
TRINITY_DN2982_c0_g1_i18	917	2	NA	NA	NA	TRINITY_DN2982_c0_g1	2200	NA	NA	NA	jcf7180001934684	5162	2794	10772	0.505	1581	1871	0	3016	5826	3285	1158	7711	3773	2468	5028	1675	2718	2751	2042	6719	As548_TRINITY_DN21265_c0_g1	9.1e-69	NA	NA	NA	0	0	4507	chr6S	6937481	83028	601	9.53e-140	503	chr6S	6937579	82469	559
TRINITY_DN29837_c0_g2_i2	488	2	NA	NA	NA	TRINITY_DN29837_c0_g2	616	NA	NA	NA	jcf7180001942611	0	0.434	0.475	0	0.132	0.93	0	0.31	0.395	0	1.49	0.789	1877	0.84	0.547	0.416	2044	0	0	3589	As548_TRINITY_DN1881_c0_g3	1.1e-102	NA	NA	NA	2088	1513	1263	chr6B	709198375	93382	136	1.05e-49	202	chr6B	52098552	87342	79
TRINITY_DN2986_c0_g1_i7	2166	2	NA	NA	NA	TRINITY_DN2986_c0_g1	2673	NA	NA	NA	NA	2832	10297	2768	1444	5.18	3059	2017	0.999	4861	1507	2927	4948	2698	6716	3186	3631	3175	3953	0.892	3881	As548_TRINITY_DN7006_c0_g1	0	NA	NA	NA	4226	7424	10879	NA	NA	NA	NA	NA	NA	NA	NA	NA	NA
TRINITY_DN30157_c1_g1_i16	1335	2	NA	NA	NA	TRINITY_DN30157_c1_g1	2100	NA	NA	NA	NA	4146	4637	6243	4224	4998	7.09	7648	11594	6283	1388	4247	5951	4858	4422	6516	3933	3294	0.764	10232	1992	As548_TRINITY_DN20487_c0_g1	1.69e-140	NA	NA	NA	22736	20548	25173	NA	NA	NA	NA	NA	NA	NA	NA	NA	NA
TRINITY_DN302_c1_g1_i7	2348	2	NA	NA	NA	TRINITY_DN302_c1_g1	2687	NA	NA	NA	NA	0.677	2433	3429	0	0	3028	1528	1.45	1558	0	0	2698	1779	1969	2553	1925	1777	0	0	1.17	As548_TRINITY_DN4596_c0_g1	0	NA	NA	NA	5654	6808	6931	NA	NA	NA	NA	NA	NA	NA	NA	NA	NA
TRINITY_DN3041_c0_g1_i16	3271	2	NA	NA	NA	TRINITY_DN3041_c0_g1	4746	NA	NA	NA	NA	0	0.229	0	0	0	0.083	0	0.239	0.104	0	0	0.021	0.186	0	0	0	0.225	0	0	0	As548_TRINITY_DN4909_c0_g1	0	NA	NA	NA	9.36	7028	4632	NA	NA	NA	NA	NA	NA	NA	NA	NA	NA
TRINITY_DN3046_c0_g1_i18	3564	2	NA	NA	NA	TRINITY_DN3046_c0_g1	4082	NA	NA	NA	NA	4187	9273	6521	0.421	4339	5891	0	3697	5359	1301	8575	4916	6.07	6973	5.93	8293	13753	3994	0	7961	As548_TRINITY_DN26920_c0_g1	0	NA	NA	NA	15843	22818	26106	NA	NA	NA	NA	NA	NA	NA	NA	NA	NA
TRINITY_DN3046_c0_g1_i6	3532	2	NA	NA	NA	TRINITY_DN3046_c0_g1	4082	NA	NA	NA	NA	0	0.145	0.313	0.554	2.22	0.103	1704	7606	0	2093	0	2432	0.45	4278	0.988	0	0	0.183	2655	0	As548_TRINITY_DN26920_c0_g1	0	NA	NA	NA	15843	22818	26106	NA	NA	NA	NA	NA	NA	NA	NA	NA	NA
TRINITY_DN30481_c0_g1_i1	328	2	NA	NA	NA	TRINITY_DN30481_c0_g1	328	NA	NA	NA	jcf7180001891201	0	3191	0	0	0	0	0	1044	0	0	0	0	0	0	0	0	0	0	0	0	As548_TRINITY_DN8736_c0_g2	2.83e-46	NA	NA	NA	2158	1539	0.467	chr6B	668517741	98932	281	1.32e-140	503	chr6B	250784297	84967	153
TRINITY_DN30583_c0_g1_i3	1216	2	NA	NA	NA	TRINITY_DN30583_c0_g1	2058	NA	NA	NA	NA	0.122	0.542	0.336	0.217	0.172	0.341	0	0.363	0.27	0	0.485	0.139	0.274	0.167	0.509	0.354	0.421	0.764	0.183	0.387	As548_TRINITY_DN15283_c0_g1	6.39e-90	NA	NA	NA	1129	1777	0.979	NA	NA	NA	NA	NA	NA	NA	NA	NA	NA
TRINITY_DN30795_c0_g1_i5	1514	2	NA	NA	NA	TRINITY_DN30795_c0_g1	2061	NA	NA	NA	jcf7180001747448	0.271	0.566	0.475	0	0.699	0.661	0	0	0	0	0	0.501	0.557	0	0.72	0	0.562	0	0.15	0	As548_TRINITY_DN59198_c0_g1	0	NA	NA	NA	8521	10239	15056	NA	NA	NA	NA	NA	NA	NA	NA	NA	NA
TRINITY_DN307_c1_g1_i5	460	2	NA	NA	NA	TRINITY_DN307_c1_g1	2091	NA	NA	NA	NA	0	0	0.382	0	0	0	0	0	0	0	0	0	0.371	0	0	0.239	0	0	0	0	As548_TRINITY_DN17_c0_g1	0	NA	NA	NA	12507	13925	10083	NA	NA	NA	NA	NA	NA	NA	NA	NA	NA
TRINITY_DN3081_c0_g1_i4	3671	2	NA	NA	NA	TRINITY_DN3081_c0_g1	4284	NA	NA	NA	NA	1897	4576	1.9	2094	5139	1974	1626	3016	2659	2396	3322	2474	3333	5732	2572	2154	4594	2435	0	5257	As548_TRINITY_DN367_c1_g2	0	NA	NA	NA	8022	12201	7761	NA	NA	NA	NA	NA	NA	NA	NA	NA	NA
TRINITY_DN3082_c0_g1_i12	1622	2	NA	NA	NA	TRINITY_DN3082_c0_g1	2563	NA	NA	NA	jcf7180001941377	0	0.602	0	1.95	2281	0.341	0	0	0.634	1366	1724	0.843	0	1605	0	0	0	0	0	0	As548_TRINITY_DN102090_c0_g1	0	NA	NA	NA	0	2357	0.091	chr6S	779687984	83797	395	9.1e-101	374	chr6S	649630863	78926	242
TRINITY_DN3096_c0_g1_i1	7405	2	NA	NA	NA	TRINITY_DN3096_c0_g1	7769	NA	NA	NA	jcf7180001933112	2114	3456	1726	0.337	1156	2522	1195	1963	2181	1.54	4184	1493	3597	2726	1823	2737	5324	0.458	1043	1502	As548_TRINITY_DN7029_c0_g1	0	NA	NA	NA	7512	6932	5178	chr6B	542486844	99033	1034	0	1855	chr6B	542496221	99496	595
TRINITY_DN3096_c0_g1_i3	7396	2	NA	NA	NA	TRINITY_DN3096_c0_g1	7769	NA	NA	NA	jcf7180001933112	1761	2.77	0.683	0.445	2899	0.982	0	0.601	0.55	0	0.404	1237	1134	2862	1401	2247	1728	0.897	0.107	1644	As548_TRINITY_DN7029_c0_g1	0	NA	NA	NA	7512	6932	5178	chr6B	542486844	99033	1034	0	1855	chr6B	542496221	99496	595
TRINITY_DN30980_c0_g1_i3	231	2	NA	NA	NA	TRINITY_DN30980_c0_g1	475	NA	NA	NA	NA	0	0	8815	0	0	0	0	0	0	0	0	0	0	0	0	0	0	0	0	0	As548_TRINITY_DN3232_c0_g2	3.01e-102	NA	NA	NA	7073	22739	10572	NA	NA	NA	NA	NA	NA	NA	NA	NA	NA
TRINITY_DN3102_c0_g1_i14	2974	2	NA	NA	NA	TRINITY_DN3102_c0_g1	5217	NA	NA	NA	NA	2412	1397	2884	1468	1723	4051	1263	0.637	2617	3014	1086	3818	1515	0.621	3944	0.177	0.716	3097	2171	0.972	As548_TRINITY_DN1141_c0_g1	0	NA	NA	NA	84691	66448	107918	chr6B	615607525	91718	326	1.81e-120	440	chr6B	507373480	89426	331
TRINITY_DN310_c0_g1_i13	2913	2	NA	NA	NA	TRINITY_DN310_c0_g1	4570	NA	NA	NA	NA	2574	2433	3892	1324	3092	1788	3809	4422	3448	1973	2.11	2165	4448	1643	2956	3839	3105	2466	1763	5447	As548_TRINITY_DN1747_c0_g1	0	NA	NA	NA	4455	6483	16194	NA	NA	NA	NA	NA	NA	NA	NA	NA	NA
TRINITY_DN3115_c1_g1_i1	3446	2	NA	NA	NA	TRINITY_DN3115_c1_g1	4505	NA	NA	NA	jcf7180001526992	0	0.241	0.591	0.758	0.041	0.537	0	0.195	0.384	0	0.314	0.672	0.098	0.22	0.883	0	0	0	0	0	As548_TRINITY_DN246_c0_g1	0	NA	NA	NA	2737	2868	5554	chr6S	150418570	98952	1908	0	3413	chr6S	150417979	99225	645
TRINITY_DN3115_c2_g1_i1	2771	2	NA	NA	NA	TRINITY_DN3115_c2_g1	3068	NA	NA	NA	NA	0.501	0.397	0.846	0	0.73	0.465	0.127	0.221	1682	0.477	0	0.8	0.626	0	0.854	1176	0.513	0.509	0.118	1233	As548_TRINITY_DN1252_c1_g2	0	NA	NA	NA	3047	2454	3198	NA	NA	NA	NA	NA	NA	NA	NA	NA	NA
TRINITY_DN3130_c0_g1_i2	3299	2	NA	NA	NA	TRINITY_DN3130_c0_g1	3916	NA	NA	NA	NA	0.732	2059	2015	0.205	1693	0.94	0.333	2308	1537	0.878	1643	1205	1.29	2158	1612	1894	1.18	1263	0.204	0.727	As548_TRINITY_DN587_c2_g1	0	NA	NA	NA	4555	14004	7.83	NA	NA	NA	NA	NA	NA	NA	NA	NA	NA
TRINITY_DN3130_c0_g1_i5	3218	2	NA	NA	NA	TRINITY_DN3130_c0_g1	3916	NA	NA	NA	NA	0.014	0.879	0.255	0	1287	0	0.127	0.035	0	0	0.943	0	0	1658	0.566	0.25	2121	0.652	0	2403	As548_TRINITY_DN587_c2_g1	0	NA	NA	NA	4555	14004	7.83	NA	NA	NA	NA	NA	NA	NA	NA	NA	NA
TRINITY_DN3131_c0_g1_i9	963	2	NA	NA	NA	TRINITY_DN3131_c0_g1	2406	NA	NA	NA	NA	29619	16.21	39289	44688	32367	57565	30641	13849	51.42	46886	21549	55734	40411	22199	52059	34701	7375	39909	38498	7668	As548_TRINITY_DN1422_c0_g4	1.27e-77	NA	NA	NA	0	0.07	0.945	NA	NA	NA	NA	NA	NA	NA	NA	NA	NA
TRINITY_DN31464_c0_g1_i3	367	2	NA	NA	NA	TRINITY_DN31464_c0_g1	1239	NA	NA	NA	jcf7180001891219	0	0	0.151	0	0	0	0	0	0	0	0	0	0	0	0.624	0	0	0	1773	0	As548_TRINITY_DN21265_c0_g1	1.14e-40	NA	NA	NA	0	0	4507	chr6B	4163564	83946	299	2.11e-69	268	chr6B	3871695	96063	127
TRINITY_DN31618_c0_g1_i5	1087	2	NA	NA	NA	TRINITY_DN31618_c0_g1	2598	NA	NA	NA	NA	0	0.783	0.232	0	0	0.393	0	0	0.27	0.358	0	0.651	0.244	0.03	0.643	0.531	0.464	0	0	0	As548_TRINITY_DN73561_c0_g1	6.43e-71	NA	NA	NA	0	0	3175	NA	NA	NA	NA	NA	NA	NA	NA	NA	NA
TRINITY_DN3165_c0_g1_i5	1768	2	NA	NA	NA	TRINITY_DN3165_c0_g1	2853	NA	NA	NA	jcf7180001629325	4078	7864	7726	4116	7461	8278	2.35	6297	10209	1399	5674	10835	5787	6496	8829	7117	7529	9027	3.31	7051	As548_TRINITY_DN13285_c0_g1	2.81e-179	NA	NA	NA	13136	18.56	28007	NA	NA	NA	NA	NA	NA	NA	NA	NA	NA
TRINITY_DN31770_c0_g1_i6	1827	2	NA	NA	NA	TRINITY_DN31770_c0_g1	2444	NA	NA	NA	NA	0.42	1301	2166	0	0.446	0.62	0	1141	0.53	0	1194	0.832	0.127	1582	2351	0.343	1847	0.703	0	1676	As548_TRINITY_DN3061_c0_g1	0	NA	NA	NA	0.17	11726	1092	NA	NA	NA	NA	NA	NA	NA	NA	NA	NA
TRINITY_DN3179_c2_g2_i1	1961	2	NA	NA	NA	TRINITY_DN3179_c2_g2	1961	NA	NA	NA	jcf7180001941432	0	4227	0.985	0.602	3893	3121	0	0.858	2119	0	2325	3786	0.89	3589	2965	1342	3301	1131	0.172	0.711	As548_TRINITY_DN22544_c1_g1	3.27e-167	NA	NA	NA	1888	0.765	4882	chr6S	139955322	91765	680	0	933	chr6S	377620377	88813	438
TRINITY_DN317_c0_g1_i9	3396	2	NBSLRR	354	2903	TRINITY_DN317_c0_g1	5334	NBSLRR	354	4841	NA	0	0	0.29	0	0.041	0.486	0.118	0.336	0.488	0	0.62	0.448	0	0.75	0.144	0.333	0.126	0	0	0.34	As548_TRINITY_DN66509_c0_g1	1.28e-95	NBSLRR	1	288	0	1355	0.842	NA	NA	NA	NA	NA	NA	NA	NA	NA	NA
TRINITY_DN3184_c0_g1_i11	2225	2	NA	NA	NA	TRINITY_DN3184_c0_g1	2758	NA	NA	NA	jcf7180001940824	0.041	0.325	0	0	0	0.424	2595	2918	0.052	0.488	0.871	0	1.74	1991	0.461	1436	1208	0.01	1795	0	As548_TRINITY_DN177_c1_g1	0	NA	NA	NA	8911	3941	4461	chr6S	804640188	96347	219	7.63e-97	361	chr6S	804527079	91781	219
TRINITY_DN3184_c0_g1_i3	2224	2	NA	NA	NA	TRINITY_DN3184_c0_g1	2758	NA	NA	NA	jcf7180001940824	1.03	1566	0.857	0.481	1906	0.413	1723	0.336	0.831	0.477	0.97	0.469	2023	0.31	1046	0.749	2395	0.234	0.677	1.96	As548_TRINITY_DN177_c1_g1	0	NA	NA	NA	8911	3941	4461	chr6S	804640188	96347	219	7.63e-97	361	chr6S	804527079	91781	219
TRINITY_DN31889_c0_g1_i2	610	2	NA	NA	NA	TRINITY_DN31889_c0_g1	1210	NA	NA	NA	NA	0	0	0.452	0	2565	2.15	0	2467	3697	0	2316	1.77	0	1219	1238	0.479	0	1559	0.967	1146	As548_TRINITY_DN5108_c0_g1	0	NA	NA	NA	1129	2129	0.467	NA	NA	NA	NA	NA	NA	NA	NA	NA	NA
TRINITY_DN31919_c0_g1_i5	346	2	NA	NA	NA	TRINITY_DN31919_c0_g1	743	NA	NA	NA	jcf7180001929675	0	0.638	1089	0	0	1095	7011	0	0	4261	2864	2037	1202	0	4635	0.947	0	0	2547	0	As548_TRINITY_DN5876_c0_g1	3.92e-63	NA	NA	NA	0.44	5427	5246	chr6B	461903326	96244	213	4.32e-94	350	chr6B	461961519	95794	214
TRINITY_DN3191_c0_g1_i10	1909	2	NA	NA	NA	TRINITY_DN3191_c0_g1	2510	NA	NA	NA	jcf7180001935377	2534	4191	2432	0.313	5139	3152	2957	6695	2929	2223	5.63	3327	2561	4263	3416	3059	4.98	3576	2.16	4316	As548_TRINITY_DN2734_c0_g1	0	NA	NA	NA	13296	16106	12279	NA	NA	NA	NA	NA	NA	NA	NA	NA	NA
TRINITY_DN3191_c0_g1_i17	1742	2	NA	NA	NA	TRINITY_DN3191_c0_g1	2510	NA	NA	NA	jcf7180001935377	0	1144	0.243	0.818	1186	0	0	0	0	1323	0	0.608	0.958	0	0.067	0	0	0	0	0.688	As548_TRINITY_DN2734_c0_g1	0	NA	NA	NA	13296	16106	12279	NA	NA	NA	NA	NA	NA	NA	NA	NA	NA
TRINITY_DN3191_c0_g1_i2	1646	2	NA	NA	NA	TRINITY_DN3191_c0_g1	2510	NA	NA	NA	jcf7180001935377	2222	4287	1598	0	4673	3142	3.76	8039	3178	3.99	6456	2.41	3607	7276	3205	3683	7.01	2415	1913	2569	As548_TRINITY_DN2734_c0_g1	0	NA	NA	NA	13296	16106	12279	NA	NA	NA	NA	NA	NA	NA	NA	NA	NA
TRINITY_DN3210_c0_g1_i8	3392	2	NA	NA	NA	TRINITY_DN3210_c0_g1	4110	NA	NA	NA	jcf7180001889383	8455	16631	11444	6.21	20771	16815	2272	12.77	15672	7308	13558	15816	9394	17399	12926	7991	18262	13744	2956	7534	As548_TRINITY_DN985_c0_g1	0	NA	NA	NA	32836	66721	32559	chr6S	320325150	95303	809	0	1279	chr6S	320324307	88599	421
TRINITY_DN3229_c0_g1_i7	2504	2	NA	NA	NA	TRINITY_DN3229_c0_g1	3309	NA	NA	NA	jcf7180001896545	0.352	0.422	0.649	1577	0.507	1468	0	0.018	1174	0.976	0.431	0.619	1681	0.507	1008	0.895	0.33	0.245	0	0.672	As548_TRINITY_DN8304_c0_g1	0	NA	NA	NA	9.99	5111	6123	chr6S	460539644	99429	525	0	952	chr6S	460540082	99538	433
TRINITY_DN322_c0_g1_i5	3402	2	NA	NA	NA	TRINITY_DN322_c0_g1	4648	NA	NA	NA	NA	3929	8599	5363	2828	7248	9188	3427	3.29	6024	3546	3511	8287	6.54	8117	6516	5692	3835	5196	1182	1842	As548_TRINITY_DN3868_c0_g1	0	NA	NA	NA	54493	63.22	49231	NA	NA	NA	NA	NA	NA	NA	NA	NA	NA
TRINITY_DN32302_c0_g1_i1	1936	2	NA	NA	NA	TRINITY_DN32302_c0_g1	3415	NA	NA	NA	NA	3889	5648	9371	7546	7248	11.1	5024	1689	9513	6148	3609	12403	6168	7057	9615	7991	2142	7754	4.31	2988	As548_TRINITY_DN9481_c0_g4	2.72e-150	NA	NA	NA	90555	71735	123475	chr6S	204602225	85841	113	2.26e-23	117	chr6S	204602117	85841	113
TRINITY_DN32302_c0_g1_i32	750	2	NA	NA	NA	TRINITY_DN32302_c0_g1	3415	NA	NA	NA	NA	7642	5985	11328	5524	5079	14552	2438	3829	13668	1496	2846	14472	9071	7973	13262	8262	1988	4177	6.18	1779	As548_TRINITY_DN9481_c0_g4	2.72e-150	NA	NA	NA	90555	71735	123475	chr6S	204602225	85841	113	2.26e-23	117	chr6S	204602117	85841	113
TRINITY_DN3240_c1_g1_i1	1254	2	NA	NA	NA	TRINITY_DN3240_c1_g1	1760	NA	NA	NA	jcf7180001721171	0	1313	0	0	2828	0	0	0.203	0	0	3672	0.149	0.44	2287	0.317	0.395	2606	0	0	1889	As548_TRINITY_DN1736_c2_g1	0	NA	NA	NA	0.809	15288	4165	chr6S	669986691	82114	492	2.87e-104	385	NA	NA	NA	NA
TRINITY_DN3245_c0_g1_i4	2654	2	NA	NA	NA	TRINITY_DN3245_c0_g1	2916	NA	NA	NA	NA	1314	0.325	1714	0.746	1267	2212	0	0.964	2804	1312	0.952	2688	1916	0.575	2428	1.55	0.569	0	1408	0	As548_TRINITY_DN517_c0_g1	0	NA	NA	NA	4535	2569	7067	NA	NA	NA	NA	NA	NA	NA	NA	NA	NA
TRINITY_DN3254_c0_g1_i2	2800	2	NA	NA	NA	TRINITY_DN3254_c0_g1	3715	NA	NA	NA	NA	8807	13946	11537	8124	17679	9911	6042	6332	4881	7688	15174	10686	11701	16286	11727	12007	18648	11258	3085	16008	As548_TRINITY_DN189_c1_g3	0	NA	NA	NA	7872	15262	16581	chr6S	139091174	85345	232	1.41e-55	224	chr6S	137277584	91736	121
TRINITY_DN3257_c0_g1_i1	494	2	NA	NA	NA	TRINITY_DN3257_c0_g1	961	NA	NA	NA	NA	0	1036	0.197	0	0.213	0.413	4142	2361	0.654	3296	1625	0	1075	2112	0.202	1592	2613	0	0.688	4648	As548_TRINITY_DN3298_c0_g2	5.18e-53	NA	NA	NA	6603	10705	4985	chr6B	59413478	89623	106	6.19e-29	134	chr6B	59413591	86585	82
TRINITY_DN3260_c0_g1_i4	4203	2	NA	NA	NA	TRINITY_DN3260_c0_g1	5126	NA	NA	NA	NA	1003	1855	2.93	0	0.659	2.47	0	0.451	2846	1063	0	2869	0.743	1961	3627	0.51	3231	1314	0	0	As548_TRINITY_DN3485_c0_g1	0	NA	NA	NA	5125	5119	7898	NA	NA	NA	NA	NA	NA	NA	NA	NA	NA
TRINITY_DN32735_c0_g1_i1	294	2	NA	NA	NA	TRINITY_DN32735_c0_g1	361	NA	NA	NA	NA	0	4986	0	0	0	0	0	0	0	0	0	0	0	0	0	0	0	0	0	0	As548_TRINITY_DN14096_c0_g1	1.42e-64	NA	NA	NA	18021	14549	14.51	NA	NA	NA	NA	NA	NA	NA	NA	NA	NA
TRINITY_DN3275_c0_g1_i10	1322	2	NA	NA	NA	TRINITY_DN3275_c0_g1	2741	NA	NA	NA	NA	3157	3673	4135	1841	3244	2077	0.392	2043	1745	2082	4516	2869	3333	2635	3378	2404	5457	3525	0	2719	As548_TRINITY_DN6474_c0_g6	0	NA	NA	NA	5464	1.9	1184	chr6B	581287953	85714	77	8.55e-12	78.7	NA	NA	NA	NA
TRINITY_DN3275_c0_g1_i4	1013	2	NA	NA	NA	TRINITY_DN3275_c0_g1	2741	NA	NA	NA	NA	0.149	0.831	0.394	0	0.953	0.155	0	1442	0.654	1095	0.287	0.192	0.87	1333	0.422	0.687	0.667	0.438	0	0.379	As548_TRINITY_DN6474_c0_g6	0	NA	NA	NA	5464	1.9	1184	chr6B	581287953	85714	77	8.55e-12	78.7	NA	NA	NA	NA
TRINITY_DN3275_c0_g1_i5	1322	2	NA	NA	NA	TRINITY_DN3275_c0_g1	2741	NA	NA	NA	NA	0.976	1337	0.637	2636	1105	0.548	0	1353	1091	0.401	1212	0.853	2405	1613	1315	2133	2465	0	2977	0	As548_TRINITY_DN6474_c0_g6	0	NA	NA	NA	5464	1.9	1184	chr6B	581287953	85714	77	8.55e-12	78.7	NA	NA	NA	NA
TRINITY_DN3275_c0_g1_i7	1567	2	NA	NA	NA	TRINITY_DN3275_c0_g1	2741	NA	NA	NA	NA	0.515	0.711	0.683	0	0	0.341	0	0	0.291	0	0.18	0.341	1105	0.204	0.24	0.364	0.14	0	0	1391	As548_TRINITY_DN6474_c0_g6	0	NA	NA	NA	5464	1.9	1184	chr6B	581287953	85714	77	8.55e-12	78.7	NA	NA	NA	NA
TRINITY_DN3291_c0_g1_i6	2366	2	NA	NA	NA	TRINITY_DN3291_c0_g1	3835	NA	NA	NA	NA	2954	1301	4019	0.59	1.5	6.18	2056	0.248	3137	2787	1293	6687	4242	1492	9654	3267	0.218	0.764	0.333	0.506	As548_TRINITY_DN986_c2_g2	0	NA	NA	NA	95.92	50738	85.09	NA	NA	NA	NA	NA	NA	NA	NA	NA	NA
TRINITY_DN32_c0_g1_i3	2371	2	NA	NA	NA	TRINITY_DN32_c0_g1	3975	NA	NA	NA	NA	0	0	0.116	0	0.365	1984	0	0.619	1973	0.998	0.153	1973	1896	1037	2437	0.291	1.18	0.55	0	0	As548_TRINITY_DN8055_c0_g1	0	NA	NA	NA	6383	8075	8899	NA	NA	NA	NA	NA	NA	NA	NA	NA	NA
TRINITY_DN33004_c0_g1_i2	539	2	NA	NA	NA	TRINITY_DN33004_c0_g1	641	NA	NA	NA	jcf7180001670383	0.759	1228	0.88	1059	0.912	0.062	0	0.699	0	0	0	0	0.87	1143	0.058	0	1194	0	0.806	0	As548_TRINITY_DN593_c0_g2	1.49e-96	NA	NA	NA	22257	32.01	25822	chr6B	11436616	85714	168	8.61e-41	172	chr6B	19765482	89041	73
TRINITY_DN3340_c0_g1_i13	5398	2	NA	NA	NA	TRINITY_DN3340_c0_g1	6177	NA	NA	NA	jcf7180001675328	6.91	9755	9266	3839	15033	7431	1577	14522	6533	9932	14393	7465	7898	15415	10613	11487	13872	4.32	3085	10712	As548_TRINITY_DN2920_c0_g1	0	NA	NA	NA	76959	76423	57607	NA	NA	NA	NA	NA	NA	NA	NA	NA	NA
TRINITY_DN33459_c0_g1_i2	3381	2	NA	NA	NA	TRINITY_DN33459_c0_g1	4554	NA	NA	NA	jcf7180001682585	0.244	0.879	0.463	0.12	0.112	0.269	0	0.336	0.395	0	0.305	0.341	0.235	1143	0.624	0.177	0.997	0.061	0	0.19	As548_TRINITY_DN44_c0_g3	7.53e-177	NA	NA	NA	1478	0.774	0.899	chr6S	57232625	91786	280	5.81e-105	388	chr6S	57237746	90991	222
TRINITY_DN3352_c0_g2_i1	2976	2	NA	NA	NA	TRINITY_DN3352_c0_g2	3095	NA	NA	NA	NA	0.257	0	0.371	0	0	0.434	0	0	0.197	0.13	0.063	0.384	0.254	0	0.384	0.354	0.295	0	0	0	As548_TRINITY_DN3450_c0_g1	0	NA	NA	NA	1269	1821	2117	NA	NA	NA	NA	NA	NA	NA	NA	NA	NA
TRINITY_DN3357_c0_g1_i15	1536	2	NA	NA	NA	TRINITY_DN3357_c0_g1	1775	NA	NA	NA	NA	1003	0.988	2015	0	0	3359	0	3476	4497	0.943	0.207	2901	1564	1461	2936	2258	0.646	2364	1257	0.482	As548_TRINITY_DN1906_c0_g1	0	NA	NA	NA	6723	5146	9594	NA	NA	NA	NA	NA	NA	NA	NA	NA	NA
TRINITY_DN3381_c0_g1_i28	3809	2	NA	NA	NA	TRINITY_DN3381_c0_g1	6020	NA	NA	NA	jcf7180001864855	0	1	0.359	0.253	0	0.589	0	0	0.301	0.228	0.269	0.437	1212	0.689	0.25	0.083	0.316	0.805	0	0.332	As548_TRINITY_DN1243_c0_g1	0	NA	NA	NA	20239	27.77	14942	chr6B	351230373	98857	350	5.38e-176	625	chr6B	351230722	98286	350
TRINITY_DN3398_c0_g1_i17	2389	2	NA	NA	NA	TRINITY_DN3398_c0_g1	3272	NA	NA	NA	NA	0.745	1084	0.95	0.481	0.933	0.475	0	2954	0.457	0.466	2792	0.053	2004	1681	0.47	1561	2774	0	2.3	0.862	As548_TRINITY_DN17452_c1_g1	4.11e-09	NA	NA	NA	0	0.352	2435	chr6S	162993315	95122	41	7.96e-08	65.8	NA	NA	NA	NA
TRINITY_DN34110_c0_g1_i4	903	2	NA	NA	NA	TRINITY_DN34110_c0_g1	2230	NA	NA	NA	NA	0	0	0.336	0	0	0	0	0	0	0.184	0	0	0.01	0	0	0	0	0	0.591	0	As548_TRINITY_DN2843_c0_g1	2.53e-79	NA	NA	NA	3726	3237	5087	NA	NA	NA	NA	NA	NA	NA	NA	NA	NA
TRINITY_DN34158_c0_g1_i4	1696	2	NA	NA	NA	TRINITY_DN34158_c0_g1	2345	NA	NA	NA	jcf7180001543836	0.786	2095	1876	1192	2129	1406	2321	2388	2129	0.553	0.943	2.41	2209	2885	2188	1228	2613	2129	0.129	0	As548_TRINITY_DN6822_c0_g1	0	NA	NA	NA	8291	11.84	16444	NA	NA	NA	NA	NA	NA	NA	NA	NA	NA
TRINITY_DN34188_c0_g1_i7	615	2	NA	NA	NA	TRINITY_DN34188_c0_g1	1816	NA	NA	NA	NA	0	0.638	0.162	0	0	0.424	0	0	0.499	1464	0.269	1184	0	0	1545	0.302	0.787	0.316	0	0	As548_TRINITY_DN31741_c0_g1	1.03e-22	NA	NA	NA	0	2.78	0.91	NA	NA	NA	NA	NA	NA	NA	NA	NA	NA
TRINITY_DN34206_c0_g1_i2	2482	2	NA	NA	NA	TRINITY_DN34206_c0_g1	2847	NA	NA	NA	NA	0	0.205	0.533	0.265	0	0.32	0	0	0.322	0	0.198	0.427	0.371	0.045	0.605	0.25	0.155	0	0	0	As548_TRINITY_DN28294_c0_g1	2.27e-150	NA	NA	NA	2457	0	0	NA	NA	NA	NA	NA	NA	NA	NA	NA	NA
TRINITY_DN34209_c0_g1_i4	767	2	NA	NA	NA	TRINITY_DN34209_c0_g1	1930	NA	NA	NA	NA	0	0.241	0.266	0	0.71	0.362	0	0.548	0.104	0	0.027	0.608	0.254	0.28	0.422	0.208	0.625	0.55	0.355	0	As548_TRINITY_DN19940_c0_g1	0	NA	NA	NA	0.24	0.888	0.478	NA	NA	NA	NA	NA	NA	NA	NA	NA	NA
TRINITY_DN3427_c0_g1_i6	4255	2	NA	NA	NA	TRINITY_DN3427_c0_g1	4737	NA	NA	NA	NA	0.556	0.963	1239	0	0.223	1416	0.95	0.982	1402	0.857	0.808	1269	1241	1348	2025	1093	0.871	0.713	0	0.427	As548_TRINITY_DN2848_c0_g2	0	NA	NA	NA	6883	7257	10402	NA	NA	NA	NA	NA	NA	NA	NA	NA	NA
TRINITY_DN3428_c0_g1_i3	668	2	NA	NA	NA	TRINITY_DN3428_c0_g1	2084	NA	NA	NA	jcf7180001569609	0	0	0.405	0	0	0.61	7031	0.646	0.955	0	0	0.811	0.899	1317	1286	0.489	0.253	0	0.43	0	As548_TRINITY_DN571_c0_g1	7.91e-129	NA	NA	NA	501675	64486	36747	chr6B	223414940	95652	46	3.02e-10	73.1	chr6B	223414898	95455	44
TRINITY_DN3435_c2_g2_i10	900	2	NA	NA	NA	TRINITY_DN3435_c2_g2	1981	NA	NA	NA	NA	2019	3866	0.139	1336	4744	0	7922	18837	0.478	3622	23389	0.107	2502	5868	0.067	0.135	9798	0	6707	9502	As548_TRINITY_DN1063_c0_g7	0	NA	NA	NA	2108	29266	2515	NA	NA	NA	NA	NA	NA	NA	NA	NA	NA
TRINITY_DN34507_c0_g2_i1	326	2	NA	NA	NA	TRINITY_DN34507_c0_g2	326	NA	NA	NA	jcf7180001580543	0	2132	0	0	0	0	0	0	0	0	0	0	0	0	0.48	0	0	0	0	0	As548_TRINITY_DN46018_c0_g1	1.61e-78	NA	NA	NA	0	0	1366	chr6B	658651560	88596	114	5.5e-30	135	chr6B	216471836	94444	72
TRINITY_DN3451_c0_g1_i14	1728	2	NA	NA	NA	TRINITY_DN3451_c0_g1	2043	NA	NA	NA	NA	0	0.65	0.66	0.927	0	0.32	0	0	0.872	0.314	0	0.032	0.567	0	0.537	0	0.555	1915	0	0.688	As548_TRINITY_DN441_c0_g1	2.69e-153	NA	NA	NA	3786	6263	4586	NA	NA	NA	NA	NA	NA	NA	NA	NA	NA
TRINITY_DN34522_c0_g1_i7	1476	2	NA	NA	NA	TRINITY_DN34522_c0_g1	2450	NA	NA	NA	NA	0	0	0.301	0	0	0.362	0	0.318	0.634	0	0	0.576	0	0.742	0.24	1228	0	0.601	0.43	0.838	As548_TRINITY_DN75582_c0_g1	0	NA	NA	NA	11318	5858	17264	NA	NA	NA	NA	NA	NA	NA	NA	NA	NA
TRINITY_DN3456_c0_g1_i8	1175	2	NA	NA	NA	TRINITY_DN3456_c0_g1	1988	NA	NA	NA	NA	5867	9743	11027	5031	8606	10397	6698	14769	13844	6397	12956	11998	10.85	14113	12993	7762	20643	9689	9931	10.68	As548_TRINITY_DN270_c0_g1	0	NA	NA	NA	22976	33206	34812	NA	NA	NA	NA	NA	NA	NA	NA	NA	NA
TRINITY_DN3459_c0_g1_i12	4005	2	NA	NA	NA	TRINITY_DN3459_c0_g1	7155	NA	NA	NA	NA	0.488	0.795	0.417	0.614	0.882	0.424	0	1017	0.955	0.022	0.844	0.597	0.723	1105	0.873	0.468	0.527	0.448	0.204	0.356	As548_TRINITY_DN6224_c1_g3	0	NA	NA	NA	7842	6553	16308	chr6B	41866086	92381	105	4.7e-33	150	chr6B	41865974	90476	105
TRINITY_DN3461_c0_g1_i12	2068	2	NA	NA	NA	TRINITY_DN3461_c0_g1	2895	NA	NA	NA	NA	0	0.385	0	0.71	0	0	0	0	0	0	0	0	0	0	0.067	0	0	0	0	0	As548_TRINITY_DN2063_c0_g1	0	NA	NA	NA	6303	5.26	4916	chr6S	742112274	93085	188	1.07e-70	274	NA	NA	NA	NA
TRINITY_DN3461_c0_g1_i16	1990	2	NA	NA	NA	TRINITY_DN3461_c0_g1	2895	NA	NA	NA	NA	0	0.229	0	2022	0	0	0	0	0	0	0	0.117	0	0	0.067	0	0	0	0	0	As548_TRINITY_DN2063_c0_g1	0	NA	NA	NA	6303	5.26	4916	chr6S	742112274	93085	188	1.07e-70	274	NA	NA	NA	NA
TRINITY_DN3461_c0_g1_i3	2231	2	NA	NA	NA	TRINITY_DN3461_c0_g1	2895	NA	NA	NA	NA	0	0.65	0.127	0	0.456	1116	0	1353	0.685	0	0	0	0.978	0.545	0.605	0.312	0.702	0	0.086	0	As548_TRINITY_DN2063_c0_g1	0	NA	NA	NA	6303	5.26	4916	chr6S	742112274	93085	188	1.07e-70	274	NA	NA	NA	NA
TRINITY_DN34655_c0_g1_i2	1175	2	NA	NA	NA	TRINITY_DN34655_c0_g1	1472	NA	NA	NA	NA	5339	4396	7.9	6343	2514	10.8	3241	2255	11726	5053	3098	11955	8817	5694	7763	7.2	3702	10311	2837	2.3	As548_TRINITY_DN12238_c0_g1	0	NA	NA	NA	20099	9773	23.09	NA	NA	NA	NA	NA	NA	NA	NA	NA	NA
TRINITY_DN3474_c0_g1_i28	2867	2	NA	NA	NA	TRINITY_DN3474_c0_g1	4537	NA	NA	NA	jcf7180001542541	0.298	0.518	0.069	0	0	0.176	0	0	0.312	0	0	0.032	0.127	0	0.144	0.499	0.084	0	0.183	0	As548_TRINITY_DN12333_c0_g2	4.52e-174	NA	NA	NA	0	2753	0	chr6S	520059764	89.8	549	0	721	chr6S	520062374	95418	371
TRINITY_DN3483_c0_g1_i1	2602	2	NA	NA	NA	TRINITY_DN3483_c0_g1	4936	NA	NA	NA	NA	0	0.458	0	0.325	0.811	0.041	0	0	0.073	0	0.189	0.171	0.283	0.659	0.259	0.333	0.33	0	1021	0	As548_TRINITY_DN5254_c0_g2	0	NA	NA	NA	8761	16133	14919	NA	NA	NA	NA	NA	NA	NA	NA	NA	NA
TRINITY_DN3483_c0_g1_i14	2476	2	NA	NA	NA	TRINITY_DN3483_c0_g1	4936	NA	NA	NA	NA	0.515	0.626	0.938	0.734	1085	0.517	0	1.45	0.872	0.445	1113	0.736	0.655	0.454	0.768	0.541	1335	1671	0	1842	As548_TRINITY_DN5254_c0_g2	0	NA	NA	NA	8761	16133	14919	NA	NA	NA	NA	NA	NA	NA	NA	NA	NA
TRINITY_DN349_c0_g1_i4	1786	2	NA	NA	NA	TRINITY_DN349_c0_g1	2839	NA	NA	NA	jcf7180001706489	5826	8936	4.39	2636	9508	1509	2987	13681	2576	2971	11493	1418	8798	11032	1977	8667	12889	1528	2268	5542	As548_TRINITY_DN954_c1_g3	0	NA	NA	NA	13506	30629	9355	chr6S	77739433	97.98	99	3.95e-40	172	chr6S	77739056	89706	68
TRINITY_DN3501_c0_g1_i3	557	2	NA	NA	NA	TRINITY_DN3501_c0_g1	872	NA	NA	NA	jcf7180001737747	5718	7455	1077	0.289	3072	1344	9704	4891	1537	0	14168	0.331	7214	13.28	1257	6992	5436	0	1075	2545	As548_TRINITY_DN94_c0_g3	7.25e-106	NA	NA	NA	17382	21331	7226	NA	NA	NA	NA	NA	NA	NA	NA	NA	NA
TRINITY_DN3508_c1_g1_i2	5788	2	NA	NA	NA	TRINITY_DN3508_c1_g1	5998	NA	NA	NA	jcf7180001929591	0.298	1072	0.811	0.096	1581	0.971	0	1318	1309	0	1275	1557	0.381	1.59	1.19	0.708	1805	0.764	0.032	0.68	As548_TRINITY_DN931_c0_g2	0	NA	NA	NA	2717	3554	2299	chr6B	711459297	86885	488	9.29e-149	534	chr6B	711454629	87391	230
TRINITY_DN3512_c1_g1_i3	767	2	NA	NA	NA	TRINITY_DN3512_c1_g1	1585	NA	NA	NA	NA	0	0.843	0.266	0	1145	0.579	0.872	2193	1579	0	0.126	1994	0.723	0.5	0.998	0.999	1391	1192	0.484	0.601	As548_TRINITY_DN19755_c0_g1	5.08e-65	NA	NA	NA	2288	5515	7591	NA	NA	NA	NA	NA	NA	NA	NA	NA	NA
TRINITY_DN3513_c0_g1_i6	1627	2	NA	NA	NA	TRINITY_DN3513_c0_g1	1921	NA	NA	NA	jcf7180001937791	0	1493	0.591	2588	1237	0.351	0	2.52	0.26	1008	0.566	0.384	1447	2415	1449	1082	4165	0	0.656	0	As548_TRINITY_DN238_c0_g2	0	NA	NA	NA	5574	12016	7522	chr6S	661204350	94258	714	0	1074	chr6S	661203305	97561	246
TRINITY_DN352_c1_g1_i2	770	2	NA	NA	NA	TRINITY_DN352_c1_g1	1295	NA	NA	NA	jcf7180001936134	0.501	1228	0.88	0	1723	3162	0	1601	1444	1052	0.485	1728	0.626	2559	2178	1696	2332	0	0	1818	As548_TRINITY_DN1027_c0_g3	3.83e-120	NA	NA	NA	8191	12623	5565	chr6S	127722174	86738	558	3.21e-167	593	chr6S	127722174	90862	383
TRINITY_DN3532_c0_g1_i6	3053	2	NA	NA	NA	TRINITY_DN3532_c0_g1	4357	NA	NA	NA	NA	0	0	0.556	0	0	0.072	0	0	0.042	0	0	0.149	0	0	0.058	0.198	0.246	0	0	0	As548_TRINITY_DN5388_c0_g1	0	NA	NA	NA	21298	10837	39831	NA	NA	NA	NA	NA	NA	NA	NA	NA	NA
TRINITY_DN3533_c1_g1_i5	3253	2	NA	NA	NA	TRINITY_DN3533_c1_g1	3412	NA	NA	NA	jcf7180001896533	0.312	0.313	0.127	0.361	0	0.579	0	0.071	0.384	0.304	0.162	0.427	0	0.151	0.307	0	0	0	0	0	As548_TRINITY_DN22148_c0_g2	0	NA	NA	NA	1608	2401	2344	chr6B	339376545	93852	1415	0	2102	chr6B	339377847	95122	1271
TRINITY_DN35358_c0_g1_i3	3733	2	NA	NA	NA	TRINITY_DN35358_c0_g1	4232	NA	NA	NA	NA	1653	1144	3429	0	2423	2842	0	0.522	5619	0	0	3487	2268	0	2082	0.874	1356	2455	0.774	0.83	As548_TRINITY_DN7448_c0_g1	0	NA	NA	NA	8052	3791	16057	NA	NA	NA	NA	NA	NA	NA	NA	NA	NA
TRINITY_DN3537_c0_g1_i3	988	2	NA	NA	NA	TRINITY_DN3537_c0_g1	1284	NA	NA	NA	NA	0	1662	1031	0	0.061	0.496	0	1831	0.395	0	0.664	0.384	0.176	0.969	3397	0.499	0.871	1865	0.398	0.514	As548_TRINITY_DN958_c0_g1	2.44e-72	NA	NA	NA	3626	22809	22362	chr6S	403788125	83217	143	2.33e-24	119	chr6S	492002000	82517	143
TRINITY_DN353_c0_g1_i25	1316	2	NA	NA	NA	TRINITY_DN353_c0_g1	2179	NA	NA	NA	NA	0	0.602	0	0	0	0	0	0	0	0	0.988	0	0	0	0	0	0	0	0	0	As548_TRINITY_DN3481_c0_g1	0	NA	NA	NA	5634	13019	11244	chr6B	570075384	96078	51	1.46e-13	84.2	NA	NA	NA	NA
TRINITY_DN35452_c0_g1_i1	460	2	NA	NA	NA	TRINITY_DN35452_c0_g1	626	NA	NA	NA	jcf7180001765772	0	0	0.382	0	1368	0.165	0	0	0	2461	0	0	0.665	0	0.47	0.635	0.442	0	0	0	As548_TRINITY_DN15766_c0_g2	6.72e-100	NA	NA	NA	0	0	4.29	chr6S	22870851	88393	112	1.1e-29	135	chr6S	22870743	88785	107
TRINITY_DN3549_c3_g1_i1	3394	2	NA	NA	NA	TRINITY_DN3549_c3_g1	4824	NA	NA	NA	jcf7180001707199	0.406	0.482	0.429	0.048	0.487	0.413	0.813	0.575	0.509	0	0.422	0.32	1212	0.628	0.307	1.79	0.618	0	0.742	0.854	As548_TRINITY_DN4959_c0_g4	0	NA	NA	NA	4735	3395	2174	chr6S	732672647	89855	69	2.51e-14	87.9	NA	NA	NA	NA
TRINITY_DN3554_c0_g1_i3	3183	2	NA	NA	NA	TRINITY_DN3554_c0_g1	3746	NA	NA	NA	NA	0.406	1879	1112	0	0.304	0.424	0	1565	0.955	0.878	0.637	0.48	0.714	0.772	1267	0.853	1559	1.09	0.301	0.656	As548_TRINITY_DN5683_c0_g1	0	NA	NA	NA	2667	4601	2492	NA	NA	NA	NA	NA	NA	NA	NA	NA	NA
TRINITY_DN3554_c0_g1_i8	1637	2	NA	NA	NA	TRINITY_DN3554_c0_g1	3746	NA	NA	NA	NA	0	0.988	0.718	0	0	0.63	0	1442	0.415	0.098	1365	0.448	0.694	1204	0.557	0.718	1566	0.122	0	0.561	As548_TRINITY_DN5683_c0_g1	0	NA	NA	NA	2667	4601	2492	NA	NA	NA	NA	NA	NA	NA	NA	NA	NA
TRINITY_DN3555_c3_g1_i12	3839	2	NBSLRR	354	2237	TRINITY_DN3555_c3_g1	3906	NBSLRR	418	2301	NA	0.637	0.915	1031	0	1733	1199	0	0.858	1911	2581	1.76	1.13	2023	2203	1526	2.06	1573	0	0	0.719	As548_TRINITY_DN4537_c1_g1	0	NBSLRR	189	1454	0.43	1029	0.535	NA	NA	NA	NA	NA	NA	NA	NA	NA	NA
TRINITY_DN357_c1_g1_i14	1233	2	NA	NA	NA	TRINITY_DN357_c1_g1	5733	NA	NA	NA	jcf7180001934304	0.014	0	1795	0	0	0	0	0.035	0	0	1625	0.768	0	0.704	1248	0	0	1691	0	0	As548_TRINITY_DN42735_c0_g2	0	NA	NA	NA	0	0	6669	chr6S	758595586	92707	905	0	1303	chr6S	758619665	81129	1081
TRINITY_DN3581_c0_g1_i12	3285	2	NA	NA	NA	TRINITY_DN3581_c0_g1	4083	NA	NA	NA	jcf7180001611853	0	0.024	0.718	0.193	0.051	1054	0	0.08	0.935	0.781	0.548	0.651	0.89	0.78	0.691	0.603	0.337	0.153	0	0	As548_TRINITY_DN1531_c0_g1	0	NA	NA	NA	21278	15746	13212	NA	NA	NA	NA	NA	NA	NA	NA	NA	NA
TRINITY_DN3598_c0_g1_i1	985	2	NA	NA	NA	TRINITY_DN3598_c0_g1	1971	NA	NA	NA	NA	6409	15969	9046	6.92	77163	39789	18371	42052	50.62	0.52	62931	37583	10215	30649	16246	6982	25033	11401	32.92	63589	As548_TRINITY_DN101843_c0_g1	3.76e-72	NA	NA	NA	19.52	33558	66825	NA	NA	NA	NA	NA	NA	NA	NA	NA	NA
TRINITY_DN36103_c0_g1_i5	903	2	NA	NA	NA	TRINITY_DN36103_c0_g1	3997	NA	NA	NA	jcf7180001917703	0.122	0.446	0.347	0.024	0	1023	0	0	0.177	2.19	0.126	0.576	0.147	0	0.221	0.114	0	0.825	0	0	As548_TRINITY_DN3207_c0_g3	0	NA	NA	NA	3386	0.765	5315	chr6B	179466940	96174	758	0	1236	chr6B	179464592	98519	270
TRINITY_DN3611_c0_g1_i1	3504	2	NA	NA	NA	TRINITY_DN3611_c0_g1	3929	NA	NA	NA	NA	2181	2385	2.12	0.939	2129	1602	3496	3714	1849	1171	4489	1685	2737	2105	2457	2622	1222	1426	1204	3.32	As548_TRINITY_DN978_c0_g1	0	NA	NA	NA	19609	30471	17366	NA	NA	NA	NA	NA	NA	NA	NA	NA	NA
TRINITY_DN3612_c0_g1_i6	2367	2	NA	NA	NA	TRINITY_DN3612_c0_g1	3129	NA	NA	NA	jcf7180001708449	1003	1529	0.614	0.903	0.476	1168	2272	1327	1039	0	1625	1184	1349	3324	1305	2.3	1.58	0	0.72	1636	As548_TRINITY_DN21303_c0_g1	0	NA	NA	NA	9.43	13327	11118	NA	NA	NA	NA	NA	NA	NA	NA	NA	NA
TRINITY_DN3615_c0_g1_i3	3114	2	NBSLRR	1702	2958	TRINITY_DN3615_c0_g1	4656	NBSLRR	316	4579	NA	0.84	1542	1274	0.891	0.882	1054	0.45	0.088	0.602	0.445	0.494	1237	0.85	0.931	1343	1373	0.492	0.907	0.29	0.356	As548_TRINITY_DN6517_c1_g1	0	NBSLRR	1595	3715	0.909	0.959	1832	chr6B	88181325	89883	257	6.11e-85	322	chr6B	51445080	90367	218
TRINITY_DN3615_c0_g1_i6	3881	2	NBSLRR	2119	3804	TRINITY_DN3615_c0_g1	4656	NBSLRR	316	4579	jcf7180001935252	1138	1421	1726	0.505	0.527	1116	0.48	0.265	1091	0.943	0.62	1226	0.86	0.924	1977	0.812	0.716	0.927	0.14	0.957	As548_TRINITY_DN6517_c1_g1	0	NBSLRR	1595	3715	0.909	0.959	1832	chr6B	88181325	89883	257	6.11e-85	322	chr6B	51445080	90367	218
TRINITY_DN36236_c0_g1_i1	485	2	NA	NA	NA	TRINITY_DN36236_c0_g1	527	NA	NA	NA	NA	1829	2686	0.417	0.024	4308	1085	0	4024	0.571	0	2586	1173	3099	3.68	1334	1332	4516	0	1.29	3961	As548_TRINITY_DN3628_c0_g1	0	NA	NA	NA	37.81	30163	5326	NA	NA	NA	NA	NA	NA	NA	NA	NA	NA
TRINITY_DN3624_c0_g1_i3	1303	2	NA	NA	NA	TRINITY_DN3624_c0_g1	2006	NA	NA	NA	jcf7180001702485	0	1096	0	1986	0	0	0	0	0	0	1329	0.053	0	0.742	0	0	0.695	0	0	0.387	As548_TRINITY_DN5239_c1_g1	0	NA	NA	NA	3556	9139	6623	chr6S	322020356	95	60	6.19e-17	95.3	NA	NA	NA	NA
TRINITY_DN3632_c0_g1_i1	4849	2	NA	NA	NA	TRINITY_DN3632_c0_g1	7655	NA	NA	NA	jcf7180001889939	9254	6.19	12185	7594	5535	14396	11702	7783	11476	10832	8117	14579	10675	5239	14375	9.77	5254	9445	11.36	5217	As548_TRINITY_DN2823_c0_g1	0	NA	NA	NA	1309	2507	0.842	chr6S	280926583	98.3	647	0	1134	chr6S	582690340	96078	357
TRINITY_DN36366_c0_g1_i4	3266	2	NA	NA	NA	TRINITY_DN36366_c0_g1	3422	NA	NA	NA	NA	0.122	0.53	0.463	0	0.061	0.527	0.578	0	0.696	0.26	0	0.544	0.088	0.061	0.691	0.156	0.218	0.132	0.193	0.04	As548_TRINITY_DN2135_c0_g1	0	NA	NA	NA	1818	2032	5986	NA	NA	NA	NA	NA	NA	NA	NA	NA	NA
TRINITY_DN3641_c0_g1_i12	938	2	NA	NA	NA	TRINITY_DN3641_c0_g1	4483	NA	NA	NA	NA	0.854	0.963	1425	0.638	1774	2.16	1557	3599	1869	2179	1347	2261	1769	1166	2812	2893	1594	2761	3794	0	As548_TRINITY_DN27309_c1_g1	0	NA	NA	NA	13836	24577	14635	NA	NA	NA	NA	NA	NA	NA	NA	NA	NA
TRINITY_DN364_c0_g1_i4	2982	2	NA	NA	NA	TRINITY_DN364_c0_g1	3647	NA	NA	NA	jcf7180001551007	0.271	1903	1367	0.734	0	1002	0.196	0.38	0.665	0.499	0.979	0.107	0.108	2143	0.816	1113	1047	1131	0.451	0.625	As548_TRINITY_DN627_c0_g1	0	NA	NA	NA	2997	7134	7682	chr6B	402301631	90311	289	7.82e-98	364	chr6B	349726849	89655	290
TRINITY_DN36574_c0_g1_i1	621	2	NA	NA	NA	TRINITY_DN36574_c0_g1	2613	NA	NA	NA	NA	0	0.988	0.127	0	0	0	0	2352	0	0	5683	0	0.117	5504	0	0	4783	0	0	5842	As548_TRINITY_DN8682_c0_g1	9.26e-179	NA	NA	NA	0.479	25008	12302	NA	NA	NA	NA	NA	NA	NA	NA	NA	NA
TRINITY_DN36610_c0_g1_i3	635	2	NA	NA	NA	TRINITY_DN36610_c0_g1	1363	NA	NA	NA	jcf7180001645091	0.135	0.397	2803	2287	0	1095	5043	1503	3822	2646	0	1536	0.645	0.727	2639	0.78	0.421	0	0	2008	As548_TRINITY_DN524_c0_g1	2.52e-92	NA	NA	NA	10979	4416	16695	chr6S	790992438	94886	176	1.39e-71	276	chr6S	790994157	88514	148
TRINITY_DN3671_c0_g1_i2	1781	2	NA	NA	NA	TRINITY_DN3671_c0_g1	2246	NA	NA	NA	NA	0.65	0.735	0.394	0	1206	0.475	0.695	0.159	1205	1767	0.584	0.917	0.44	0.719	0.537	0.739	1531	0	0.795	1668	As548_TRINITY_DN770_c1_g1	0	NA	NA	NA	50527	59798	45.76	NA	NA	NA	NA	NA	NA	NA	NA	NA	NA
TRINITY_DN3671_c0_g1_i6	1841	2	NA	NA	NA	TRINITY_DN3671_c0_g1	2246	NA	NA	NA	NA	2.48	2987	3104	2985	4612	4072	2605	9764	5681	1952	9158	5076	3069	4338	3.32	2.56	5598	3505	4.02	9178	As548_TRINITY_DN770_c1_g1	0	NA	NA	NA	50527	59798	45.76	NA	NA	NA	NA	NA	NA	NA	NA	NA	NA
TRINITY_DN36819_c0_g1_i1	1677	2	NA	NA	NA	TRINITY_DN36819_c0_g1	1921	NA	NA	NA	NA	0	0.349	0	0	0.193	0.196	0.744	0	0.104	0	0	0	0.811	0	0.624	0	0.147	0.571	0.215	0	As548_TRINITY_DN36749_c0_g1	0	NA	NA	NA	0.579	0.88	1821	NA	NA	NA	NA	NA	NA	NA	NA	NA	NA
TRINITY_DN3685_c2_g1_i6	3269	2	NA	NA	NA	TRINITY_DN3685_c2_g1	3718	NA	NA	NA	jcf7180001528111	1558	2288	1309	1384	1186	1095	0.979	1742	0.862	0.867	0.53	0.97	0.802	1832	1.43	2.05	2086	0.703	0.903	2522	As548_TRINITY_DN1659_c0_g2	0	NA	NA	NA	3816	5.04	4.29	chr6B	704972424	86444	450	4.54e-135	488	chr6B	704972126	89031	392
TRINITY_DN36938_c0_g1_i2	780	2	NA	NA	NA	TRINITY_DN36938_c0_g1	1478	NA	NA	NA	jcf7180001630468	0	0.711	0	0	0	0	0	0	0	0.976	0	0	0	0	0	0	0	0	0	0	As548_TRINITY_DN6895_c0_g1	3.37e-126	NA	NA	NA	0.919	0.836	0.945	chr6B	166591863	93714	175	1.18e-67	263	chr6B	166593201	93182	176
TRINITY_DN36938_c0_g1_i5	883	2	NA	NA	NA	TRINITY_DN36938_c0_g1	1478	NA	NA	NA	jcf7180001630468	0	2144	4286	0	6731	0.899	0	7517	1942	0	7335	1034	0	6345	1967	0	4713	1488	0	3115	As548_TRINITY_DN6895_c0_g1	3.37e-126	NA	NA	NA	0.919	0.836	0.945	chr6B	166591863	93714	175	1.18e-67	263	chr6B	166593201	93182	176
TRINITY_DN3701_c0_g1_i1	2346	2	NA	NA	NA	TRINITY_DN3701_c0_g1	4334	NA	NA	NA	NA	0	0	0.232	0	0	0	0	0	0	0	0	0	0	0	0	0	0	0	0	0.585	As548_TRINITY_DN4229_c0_g2	0	NA	NA	NA	4026	3281	3334	NA	NA	NA	NA	NA	NA	NA	NA	NA	NA
TRINITY_DN3701_c0_g1_i11	1836	2	NA	NA	NA	TRINITY_DN3701_c0_g1	4334	NA	NA	NA	NA	1043	1409	0.672	1216	0.365	0.258	0	2105	0.332	0.249	1302	0.608	1085	1673	0.576	1207	1419	0	1515	0	As548_TRINITY_DN4229_c0_g2	0	NA	NA	NA	4026	3281	3334	NA	NA	NA	NA	NA	NA	NA	NA	NA	NA
TRINITY_DN3705_c0_g1_i1	2914	2	NA	NA	NA	TRINITY_DN3705_c0_g1	3517	NA	NA	NA	NA	0.163	0.735	0.058	0	0.172	0.868	0	0.195	0.28	0.043	0.736	0.32	0.254	1181	0.71	0.312	1356	0.53	0	0.403	As548_TRINITY_DN1911_c0_g1	0	NA	NA	NA	3846	3026	5167	NA	NA	NA	NA	NA	NA	NA	NA	NA	NA
TRINITY_DN371_c0_g1_i2	1270	2	NBSLRR	128	1258	TRINITY_DN371_c0_g1	2607	NBSLRR	590	2533	jcf7180001567675	0	0	0.544	0	0.182	1023	0	1061	0.519	0	1131	0.864	0.665	0.053	0.096	0.458	0	0	0	0.34	As548_TRINITY_DN3036_c0_g1	3.59e-123	NBSLRR	1834	5124	5484	4.02	5019	NA	NA	NA	NA	NA	NA	NA	NA	NA	NA
TRINITY_DN371_c0_g1_i2	1270	2	NBSLRR	128	1258	TRINITY_DN371_c0_g1	2607	NBSLRR	590	2533	jcf7180001567675	0	0	0.544	0	0.182	1023	0	1061	0.519	0	1131	0.864	0.665	0.053	0.096	0.458	0	0	0	0.34	As548_TRINITY_DN3036_c0_g1	3.59e-123	NBSLRR	1834	5124	5484	4.02	5019	NA	NA	NA	NA	NA	NA	NA	NA	NA	NA
TRINITY_DN37272_c0_g1_i4	1339	2	NA	NA	NA	TRINITY_DN37272_c0_g1	2849	NA	NA	NA	jcf7180001896628	0	0.47	0.081	0	0	0.217	0.098	0	0.135	0	0.099	0.192	0.557	0	0.125	0.51	0.611	0	0	0	As548_TRINITY_DN10737_c1_g3	1.73e-161	NA	NA	NA	0	0.413	0.922	chr6B	700092937	94787	211	8e-87	327	chr6B	646285881	92523	214
TRINITY_DN3739_c0_g1_i13	1610	2	NA	NA	NA	TRINITY_DN3739_c0_g1	2633	NA	NA	NA	NA	0.61	1132	0.591	2142	2.24	2687	0	1256	2607	2125	0.009	3615	2004	1408	0.365	3652	1777	0.061	0.892	1866	As548_TRINITY_DN2171_c0_g1	0	NA	NA	NA	7153	6439	7374	NA	NA	NA	NA	NA	NA	NA	NA	NA	NA
TRINITY_DN37543_c0_g1_i5	1020	2	NA	NA	NA	TRINITY_DN37543_c0_g1	2382	NA	NA	NA	NA	0	0	0.22	1252	0	0.827	0	0.239	0.426	0	0	0.405	0.098	0	0	0.499	0.119	0.978	0	0	As548_TRINITY_DN4290_c6_g1	3.81e-18	NA	NA	NA	8501	4108	5371	NA	NA	NA	NA	NA	NA	NA	NA	NA	NA
TRINITY_DN37575_c0_g1_i2	486	2	NA	NA	NA	TRINITY_DN37575_c0_g1	1464	NA	NA	NA	jcf7180001936663	0	0	0.139	2997	0	0.083	0	0	0.405	0	0	0	0.782	0	0.345	0.416	0.126	0	0.43	0	As548_TRINITY_DN47381_c0_g1	3.58e-76	NA	NA	NA	0	1.46	1309	chr6B	502905612	95315	555	0	865	chr6B	336021421	100	252
TRINITY_DN37616_c0_g1_i2	3440	2	NA	NA	NA	TRINITY_DN37616_c0_g1	3901	NA	NA	NA	NA	0.501	0.373	0.961	0	0.375	0.599	0	0	0.374	0	0.224	0.843	0.811	0.333	1295	0.988	0.316	0	0	0	As548_TRINITY_DN5667_c0_g1	0	NA	NA	NA	1818	0.853	1423	NA	NA	NA	NA	NA	NA	NA	NA	NA	NA
TRINITY_DN37616_c0_g1_i3	3368	2	NA	NA	NA	TRINITY_DN37616_c0_g1	3901	NA	NA	NA	NA	0.461	0.169	0.996	0	0	0.589	0	0	0.27	0.314	0	0.555	0.508	0.363	1209	0.603	0.14	0.713	0.129	0	As548_TRINITY_DN5667_c0_g1	0	NA	NA	NA	1818	0.853	1423	NA	NA	NA	NA	NA	NA	NA	NA	NA	NA
TRINITY_DN3778_c0_g1_i2	3020	2	NA	NA	NA	TRINITY_DN3778_c0_g1	4055	NA	NA	NA	NA	0	0.843	1286	0.373	1095	1.55	0.92	0.548	0.976	0.401	0.332	0.587	0.674	0.31	1075	0.78	1.11	0	0.064	0	As548_TRINITY_DN4186_c0_g1	0	NA	NA	NA	4535	4724	2458	chr6S	680841294	93289	149	1.99e-54	220	NA	NA	NA	NA
TRINITY_DN378_c0_g1_i12	4220	2	NA	NA	NA	TRINITY_DN378_c0_g1	7238	NA	NA	NA	NA	0	0.084	0.139	0	0	0.351	0	0	0.187	0	0.162	0.117	0.01	0.038	0.288	0.354	0.499	0	0	0	As548_TRINITY_DN259_c1_g1	0	NA	NA	NA	5225	4952	7431	NA	NA	NA	NA	NA	NA	NA	NA	NA	NA
TRINITY_DN38098_c0_g2_i11	1126	2	NA	NA	NA	TRINITY_DN38098_c0_g2	1962	NA	NA	NA	NA	0	0.662	2131	1613	1216	0.92	0.852	0.327	0.779	0.054	0	2005	1241	0.568	1219	1415	0.169	5268	0.623	1953	As548_TRINITY_DN10041_c1_g2	6.58e-35	NA	NA	NA	7063	0	4324	chr6S	412597522	90385	104	3.57e-29	135	NA	NA	NA	NA
TRINITY_DN38196_c0_g1_i4	1035	2	NA	NA	NA	TRINITY_DN38196_c0_g1	2407	NA	NA	NA	NA	1721	2625	1888	0.409	1358	2046	0	1.07	3978	0.228	2029	1781	2424	1272	1948	2071	1637	2374	1279	0	As548_TRINITY_DN16977_c0_g1	6.53e-06	NA	NA	NA	0.11	0.229	0.751	NA	NA	NA	NA	NA	NA	NA	NA	NA	NA
TRINITY_DN3821_c1_g1_i10	1318	2	NA	NA	NA	TRINITY_DN3821_c1_g1	7941	NA	NA	NA	jcf7180001942037	5339	3011	6313	7414	6.69	10862	4348	4899	9991	7048	3681	9929	4057	2.4	6055	4245	5774	10.27	9.63	7304	As548_TRINITY_DN14441_c0_g1	0	NA	NA	NA	4615	15288	4575	chr6S	152497958	97052	407	0	678	chr6S	561706530	96806	407
TRINITY_DN3821_c1_g1_i17	1028	2	NA	NA	NA	TRINITY_DN3821_c1_g1	7941	NA	NA	NA	jcf7180001942037	13401	11525	16228	22398	15793	23739	10713	11223	33.65	15538	10101	30.48	8016	7526	22666	8137	12264	16801	13736	16783	As548_TRINITY_DN14441_c0_g1	0	NA	NA	NA	4615	15288	4575	chr6S	152497958	97052	407	0	678	chr6S	561706530	96806	407
TRINITY_DN3840_c0_g1_i1	2383	2	NA	NA	NA	TRINITY_DN3840_c0_g1	3310	NA	NA	NA	jcf7180001891330	0	1867	1066	0	0	0.548	0	0	0.727	0	0.53	0.117	0	0.462	1449	0	0.351	0	0	0	As548_TRINITY_DN7976_c0_g6	3.41e-149	NA	NA	NA	0.679	0	2208	chr6S	2127367	96508	315	3.98e-145	521	chr6S	2127738	88415	328
TRINITY_DN3852_c0_g1_i4	2164	2	NA	NA	NA	TRINITY_DN3852_c0_g1	3315	NA	NA	NA	jcf7180001927701	0	0.12	0	0.951	0	0	0	0	0.644	0	0	0	0	0.167	0	0.676	0	1549	0	0.885	As548_TRINITY_DN6301_c0_g1	0	NA	NA	NA	2078	3782	2606	chr6S	101596206	93491	676	0	977	chr6S	101597386	97561	533
TRINITY_DN3852_c0_g1_i6	2251	2	NA	NA	NA	TRINITY_DN3852_c0_g1	3315	NA	NA	NA	jcf7180001927701	0.677	0.446	1.17	0.602	1622	1064	0	1946	1267	0.705	0	1578	0.176	1174	1228	0.791	0.773	0.458	0	0	As548_TRINITY_DN6301_c0_g1	0	NA	NA	NA	2078	3782	2606	chr6S	101596206	93491	676	0	977	chr6S	101597386	97561	533
TRINITY_DN3863_c0_g1_i4	6195	2	NA	NA	NA	TRINITY_DN3863_c0_g1	6618	NA	NA	NA	NA	0.027	0.855	0.22	0	0.639	0.145	0	0.327	0.467	0	0.413	0.395	0.254	1075	0.355	0.229	0.955	0.173	0	0.561	As548_TRINITY_DN11301_c0_g1	0	NA	NA	NA	5654	16467	8057	NA	NA	NA	NA	NA	NA	NA	NA	NA	NA
TRINITY_DN3876_c0_g1_i4	3291	2	NA	NA	NA	TRINITY_DN3876_c0_g1	4006	NA	NA	NA	NA	0	0	0.058	0	0	0.155	0	0	0.249	0	0.233	0.395	0.293	0.167	0.585	0.364	0	0	0.29	0	As548_TRINITY_DN950_c0_g1	0	NA	NA	NA	8711	5858	17264	NA	NA	NA	NA	NA	NA	NA	NA	NA	NA
TRINITY_DN38794_c0_g1_i1	368	2	NA	NA	NA	TRINITY_DN38794_c0_g1	368	NA	NA	NA	NA	0	0	0.44	0	0	0	0	0	0	0	0	0	0.821	0	0	1509	0	0	0	0	As548_TRINITY_DN14691_c0_g2	4.18e-40	NA	NA	NA	0	0.888	0	NA	NA	NA	NA	NA	NA	NA	NA	NA	NA
TRINITY_DN3885_c0_g1_i10	3551	2	NA	NA	NA	TRINITY_DN3885_c0_g1	4187	NA	NA	NA	NA	0.488	0.53	0.046	1288	0	0	0.617	0.327	0	0	0.233	0.064	0.499	0.053	0.393	0.843	0.569	0	0	0	As548_TRINITY_DN5522_c0_g1	0	NA	NA	NA	10789	9702	6817	NA	NA	NA	NA	NA	NA	NA	NA	NA	NA
TRINITY_DN3888_c0_g1_i12	4963	2	NA	NA	NA	TRINITY_DN3888_c0_g1	5639	NA	NA	NA	NA	0	1.12	0.371	0	0	0.579	0	0.672	0.519	0.401	0.593	0.885	0.587	1234	0.844	0.635	1173	0	0.086	0	As548_TRINITY_DN480_c1_g1	0	NA	NA	NA	4605	4213	3448	NA	NA	NA	NA	NA	NA	NA	NA	NA	NA
TRINITY_DN3888_c0_g1_i4	4963	2	NA	NA	NA	TRINITY_DN3888_c0_g1	5639	NA	NA	NA	NA	0	0	0.069	0	0	0	0	0	0	0	0.628	0	0.078	0	0	0.177	0	0	0	0	As548_TRINITY_DN480_c1_g1	0	NA	NA	NA	4605	4213	3448	NA	NA	NA	NA	NA	NA	NA	NA	NA	NA
TRINITY_DN3900_c0_g1_i25	960	2	NA	NA	NA	TRINITY_DN3900_c0_g1	6311	NA	NA	NA	jcf7180001594768	0	0.434	0	0	0	0.444	0	0.433	0.364	0	0	0.619	0.674	1234	0.585	0	0.112	0	0.312	2632	As548_TRINITY_DN324_c0_g1	4.24e-91	NA	NA	NA	226982	502933	399878	NA	NA	NA	NA	NA	NA	NA	NA	NA	NA
TRINITY_DN3905_c1_g4_i1	1480	2	NA	NA	NA	TRINITY_DN3905_c1_g4	1480	NA	NA	NA	jcf7180001934302	2.94	5275	4529	5392	7765	5157	3.76	6.27	3261	5.27	4866	4575	5806	5807	5153	5681	5563	1538	2827	2735	As548_TRINITY_DN142_c0_g4	7.35e-118	NA	NA	NA	0.14	0.396	1696	NA	NA	NA	NA	NA	NA	NA	NA	NA	NA
TRINITY_DN3908_c0_g1_i4	1559	2	NA	NA	NA	TRINITY_DN3908_c0_g1	2657	NA	NA	NA	NA	0	0.698	0.695	0.505	0.517	0	0	0.575	0.478	2245	0.844	0.896	0.665	0	0.585	0.718	1313	0.499	0.57	0	As548_TRINITY_DN5046_c0_g2	0	NA	NA	NA	1878	5577	5144	NA	NA	NA	NA	NA	NA	NA	NA	NA	NA
TRINITY_DN3910_c0_g1_i10	2125	2	NA	NA	NA	TRINITY_DN3910_c0_g1	2361	NA	NA	NA	NA	5.46	4781	13645	8678	5373	16515	2301	1503	16181	10605	2595	20274	5376	2786	13492	6774	1693	11646	7803	2435	As548_TRINITY_DN5841_c0_g1	0	NA	NA	NA	40747	18824	62364	NA	NA	NA	NA	NA	NA	NA	NA	NA	NA
TRINITY_DN3911_c0_g1_i27	1781	2	NA	NA	NA	TRINITY_DN3911_c0_g1	2902	NA	NA	NA	NA	0.149	0.313	2201	0	0.527	1064	0	0	1194	0	0	2016	0.596	0	1.9	0.343	0	0	0.473	0	As548_TRINITY_DN6224_c1_g1	8.37e-145	NA	NA	NA	13126	25307	12973	NA	NA	NA	NA	NA	NA	NA	NA	NA	NA
TRINITY_DN3926_c0_g1_i8	3724	2	NA	NA	NA	TRINITY_DN3926_c0_g1	4485	NA	NA	NA	NA	0	0	0.73	0	3031	0.372	0	0	0.135	0	0	0	1056	0.008	0.038	0.229	0	0	0.097	0	As548_TRINITY_DN1156_c0_g1	0	NA	NA	NA	3606	4882	4313	NA	NA	NA	NA	NA	NA	NA	NA	NA	NA
TRINITY_DN39357_c0_g1_i12	967	2	NA	NA	NA	TRINITY_DN39357_c0_g1	2079	NA	NA	NA	NA	0	0.494	0.463	0	0	0.558	0	0	0.634	0	0	0.384	0.528	0.447	0.653	0.26	0.232	0	0.247	0.759	As548_TRINITY_DN48352_c0_g1	0	NA	NA	NA	0.579	0.748	0.785	NA	NA	NA	NA	NA	NA	NA	NA	NA	NA
TRINITY_DN3949_c0_g2_i6	3178	2	NA	NA	NA	TRINITY_DN3949_c0_g2	3824	NA	NA	NA	jcf7180001941367	0.867	1481	0.95	0	0.426	0.94	0	1291	0.966	0.152	0.637	1984	0.587	0.878	1574	1197	0.541	2894	0	3589	As548_TRINITY_DN257_c0_g1	0	NA	NA	NA	12447	11655	18629	chr6B	670299516	90594	202	8.56e-68	265	chr6B	670299317	90594	202
TRINITY_DN39536_c0_g1_i1	732	2	NA	NA	NA	TRINITY_DN39536_c0_g1	1299	NA	NA	NA	NA	0	0.843	0.556	0.53	0.659	0.744	0	0.239	1184	1702	0	0.97	0	1423	1219	0.499	1166	0	0.688	2285	As548_TRINITY_DN1985_c0_g1	3.19e-71	NA	NA	NA	5025	2375	3949	NA	NA	NA	NA	NA	NA	NA	NA	NA	NA
TRINITY_DN3970_c0_g1_i10	3533	2	NA	NA	NA	TRINITY_DN3970_c0_g1	4634	NA	NA	NA	NA	0.772	0.602	3846	1541	0.72	2863	1723	0	3438	0	0.413	4447	0.518	0.856	2725	0.988	0	3158	0.838	0.98	As548_TRINITY_DN1365_c0_g1	0	NA	NA	NA	3696	1372	9059	NA	NA	NA	NA	NA	NA	NA	NA	NA	NA
TRINITY_DN3970_c0_g1_i2	3774	2	NA	NA	NA	TRINITY_DN3970_c0_g1	4634	NA	NA	NA	NA	0.366	0	2097	0.554	0.304	2491	0	1123	1786	0.998	0.404	1973	0.86	0.341	1.66	0.832	0.808	0	0.107	0	As548_TRINITY_DN1365_c0_g1	0	NA	NA	NA	3696	1372	9059	NA	NA	NA	NA	NA	NA	NA	NA	NA	NA
TRINITY_DN3972_c0_g1_i19	1592	2	NA	NA	NA	TRINITY_DN3972_c0_g1	2674	NA	NA	NA	jcf7180001910444	0.163	1.12	0.29	0	1348	0.186	0	1362	0.353	0.661	1419	0.501	0.596	1234	0.47	1269	1194	0	0.172	1549	As548_TRINITY_DN11115_c0_g1	0	NA	NA	NA	7073	7547	7397	NA	NA	NA	NA	NA	NA	NA	NA	NA	NA
TRINITY_DN3981_c0_g1_i13	2509	2	NA	NA	NA	TRINITY_DN3981_c0_g1	3454	NA	NA	NA	NA	0.935	1265	2073	1035	1885	1736	1156	1114	1309	0.694	1392	1034	0.811	2506	1622	1654	1447	0.998	1182	0.379	As548_TRINITY_DN18258_c0_g1	0	NA	NA	NA	4525	6597	5258	NA	NA	NA	NA	NA	NA	NA	NA	NA	NA
TRINITY_DN3989_c1_g1_i5	4472	2	NA	NA	NA	TRINITY_DN3989_c1_g1	4656	NA	NA	NA	NA	0.352	0.951	0.232	0.855	0.811	0.517	0.382	0.654	0.654	0.488	1607	0.523	0.948	0.129	0.403	1155	1651	0	0	0	As548_TRINITY_DN2518_c0_g1	0	NA	NA	NA	4725	2454	1923	NA	NA	NA	NA	NA	NA	NA	NA	NA	NA
TRINITY_DN3989_c1_g5_i1	1546	2	NA	NA	NA	TRINITY_DN3989_c1_g5	1546	NA	NA	NA	jcf7180001934065	9729	10465	18116	20171	23275	19492	14121	19536	25528	20515	18361	18429	11486	10.88	21639	11362	10887	24911	21474	13961	As548_TRINITY_DN7875_c0_g6	0	NA	NA	NA	1299	2.34	1047	chr6B	157791598	98254	1489	0	2654	NA	NA	NA	NA
TRINITY_DN39927_c0_g1_i1	1831	2	NA	NA	NA	TRINITY_DN39927_c0_g1	2074	NA	NA	NA	jcf7180001934118	0.461	0.879	0.151	0.265	0.578	0.486	0	1044	0.312	0.26	0	0.768	0	0.28	0.921	0	0.85	0.448	0.398	0	As548_TRINITY_DN8958_c0_g1	0	NA	NA	NA	0.939	0.361	1445	chr6S	16945803	97854	792	0	1369	chr6S	16944424	96165	339
TRINITY_DN39993_c0_g1_i1	525	2	NA	NA	NA	TRINITY_DN39993_c0_g1	918	NA	NA	NA	NA	0	0	0.232	0	1764	1922	0	0	1163	0.867	0	1482	0.772	0.719	1708	0.531	0.33	1712	0	0.047	As548_TRINITY_DN4534_c0_g1	0	NA	NA	NA	5654	2885	2378	NA	NA	NA	NA	NA	NA	NA	NA	NA	NA
TRINITY_DN40126_c0_g1_i2	1223	2	NA	NA	NA	TRINITY_DN40126_c0_g1	2201	NA	NA	NA	jcf7180001616546	1856	2156	2108	2215	3183	1695	0	2255	2.43	4294	3573	2.25	2033	2786	1785	1.53	4.46	1141	1913	1866	As548_TRINITY_DN1080_c2_g1	6.11e-170	NA	NA	NA	8551	17813	5.77	chr6B	269744225	93333	75	6.75e-22	111	chr6B	269744385	95522	67
TRINITY_DN4016_c0_g1_i13	3927	2	NA	NA	NA	TRINITY_DN4016_c0_g1	4657	NA	NA	NA	NA	0.108	0.674	0	0	0	0	0	0.265	0	0	0	0	1359	1083	0	1082	0	0	0	0	As548_TRINITY_DN1117_c0_g1	0	NA	NA	NA	4905	1.83	1.9	NA	NA	NA	NA	NA	NA	NA	NA	NA	NA
TRINITY_DN4016_c0_g1_i20	3937	2	NA	NA	NA	TRINITY_DN4016_c0_g1	4657	NA	NA	NA	NA	0	0.518	0	0.53	0	0.031	0	0	0.208	0	1077	0.096	0.117	0	0.048	0	0.063	0	0	0.806	As548_TRINITY_DN1117_c0_g1	0	NA	NA	NA	4905	1.83	1.9	NA	NA	NA	NA	NA	NA	NA	NA	NA	NA
TRINITY_DN40209_c0_g1_i4	734	2	NA	NA	NA	TRINITY_DN40209_c0_g1	1229	NA	NA	NA	jcf7180001587896	0	0	0.672	0	0	0.248	0	0	1433	0	0	1141	0.244	0	0.269	0.343	0.133	0	0.903	0	As548_TRINITY_DN7406_c0_g2	1.23e-159	NA	NA	NA	0.659	1091	2504	NA	NA	NA	NA	NA	NA	NA	NA	NA	NA
TRINITY_DN4024_c0_g1_i14	7946	2	NA	NA	NA	TRINITY_DN4024_c0_g1	8689	NA	NA	NA	jcf7180001896642	0	0.108	0	0	0	0	0	0	0	0	0.171	0	0	0	0	0	0.014	0.255	0	0	As548_TRINITY_DN3368_c0_g1	0	NA	NA	NA	2018	1706	2219	chr6S	710055937	98124	2132	0	3705	chr6S	710053253	99106	1231
TRINITY_DN4024_c0_g1_i7	7946	2	NA	NA	NA	TRINITY_DN4024_c0_g1	8689	NA	NA	NA	jcf7180001896642	0.217	0.566	1274	0	1125	0.682	0	0.743	0.831	0	0.682	0.757	0.42	1.37	0.691	0.572	0.983	0.55	0.064	0	As548_TRINITY_DN3368_c0_g1	0	NA	NA	NA	2018	1706	2219	chr6S	710055937	98124	2132	0	3705	chr6S	710053253	99106	1231
TRINITY_DN4030_c0_g1_i15	4113	2	NA	NA	NA	TRINITY_DN4030_c0_g1	5074	NA	NA	NA	NA	0	0	0.012	0	0	0	0	0.035	0	0	0	0	0.244	0	0	0	0	0	0	0	As548_TRINITY_DN11719_c0_g1	0	NA	NA	NA	2208	2041	4381	NA	NA	NA	NA	NA	NA	NA	NA	NA	NA
TRINITY_DN4030_c0_g1_i32	4067	2	NA	NA	NA	TRINITY_DN4030_c0_g1	5074	NA	NA	NA	NA	0.745	0.349	0.892	0.253	0.243	1891	1283	0.601	1132	1247	0.413	2005	0.371	1529	1401	1.02	0.794	1.09	0.387	0.047	As548_TRINITY_DN11719_c0_g1	0	NA	NA	NA	2208	2041	4381	NA	NA	NA	NA	NA	NA	NA	NA	NA	NA
TRINITY_DN40359_c0_g1_i9	1627	2	NA	NA	NA	TRINITY_DN40359_c0_g1	1924	NA	NA	NA	NA	1043	0.698	2629	0.433	0.395	2284	0.304	0.212	2316	0.802	0.287	2986	2199	0.833	2716	0.947	0.927	2547	0.322	0	As548_TRINITY_DN20657_c0_g1	3.83e-42	NA	NA	NA	1319	2824	0.239	chr6B	704026024	93.75	80	9.79e-25	121	chr6B	664091939	83146	89
TRINITY_DN40614_c0_g1_i5	583	2	NA	NA	NA	TRINITY_DN40614_c0_g1	949	NA	NA	NA	jcf7180001527188	0.474	0.229	0.683	0	0	0.403	0	2388	0	2353	0	0.117	0	3.18	1459	0.926	0	0	0	1526	As548_TRINITY_DN8057_c0_g1	1.04e-94	NA	NA	NA	0.749	0.589	3653	chr6B	706987214	95714	70	2.86e-22	111	NA	NA	NA	NA
TRINITY_DN4067_c0_g1_i7	1775	2	NA	NA	NA	TRINITY_DN4067_c0_g1	2483	NA	NA	NA	jcf7180001533925	0.881	0.674	1019	0.325	1744	3018	0.431	3573	2295	0.802	1993	2943	1281	2029	3493	0.978	1.58	2078	0.322	2498	As548_TRINITY_DN7246_c0_g1	7.35e-125	NA	NA	NA	2427	4592	8524	chr6B	11539750	96416	279	1.1e-124	453	chr6B	11537931	95671	231
TRINITY_DN4070_c0_g1_i6	2285	2	NA	NA	NA	TRINITY_DN4070_c0_g1	2906	NA	NA	NA	NA	1084	0.373	1981	0.83	0.618	3235	0.245	0.186	2742	1236	1024	4394	1271	0.628	3589	1124	0	1691	1322	0	As548_TRINITY_DN8164_c0_g1	0	NA	NA	NA	3317	1768	7113	NA	NA	NA	NA	NA	NA	NA	NA	NA	NA
TRINITY_DN4075_c0_g1_i10	2182	2	NA	NA	NA	TRINITY_DN4075_c0_g1	4737	NA	NA	NA	NA	0	3179	2178	0	0	1922	2918	1.38	2181	0.694	0.844	2784	3539	0.886	1833	2.57	2248	0	0	0.893	As548_TRINITY_DN2889_c0_g1	0	NA	NA	NA	7372	8357	5952	NA	NA	NA	NA	NA	NA	NA	NA	NA	NA
TRINITY_DN40784_c0_g1_i30	3223	2	NA	NA	NA	TRINITY_DN40784_c0_g1	4687	NA	NA	NA	jcf7180001538561	0	0.301	0.139	0	0.558	0.176	0	0.451	0.332	0	0.844	0.203	0	0.689	0.115	0.323	0.513	0.01	0	2032	As548_TRINITY_DN429_c0_g3	2.43e-92	NA	NA	NA	64143	94931	68213	chr6B	187992327	82692	468	9.93e-108	398	chr6B	63579162	100	157
TRINITY_DN4084_c0_g1_i3	2874	2	NA	NA	NA	TRINITY_DN4084_c0_g1	3313	NA	NA	NA	NA	0.623	1951	2595	0.277	0.831	2449	0	0.61	3074	2147	1077	1429	0.948	1847	1574	0.697	1967	1844	0	2095	As548_TRINITY_DN518_c3_g1	0	NA	NA	NA	2837	4363	4632	chr6B	145900665	92308	65	3.7e-16	93.5	NA	NA	NA	NA
TRINITY_DN4085_c0_g1_i2	2589	2	NA	NA	NA	TRINITY_DN4085_c0_g1	3822	NA	NA	NA	NA	0	0.915	0.394	0	0.375	0.362	0	0.619	0.789	0.52	0	0.491	0.753	0.114	0.557	0.843	0.435	0	0	0.561	As548_TRINITY_DN9906_c0_g2	0	NA	NA	NA	1419	1548	2447	chr6S	285685816	96721	61	2.55e-18	100	NA	NA	NA	NA
TRINITY_DN408_c0_g1_i18	1437	2	NA	NA	NA	TRINITY_DN408_c0_g1	2168	NA	NA	NA	NA	0.854	1012	0.429	5488	4339	0.816	4691	2945	0.436	0	6204	0.565	1046	0	1555	0	0	0	3977	2024	As548_TRINITY_DN6119_c0_g1	0	NA	NA	NA	1528	7204	0.398	chr6S	734251229	75692	325	1.1e-29	137	NA	NA	NA	NA
TRINITY_DN4091_c0_g1_i9	1533	2	NA	NA	NA	TRINITY_DN4091_c0_g1	2265	NA	NA	NA	jcf7180001895133	1978	0.867	2027	0	5484	0.238	0	4555	1226	0.087	5612	1504	1945	1726	0.921	2716	2311	3709	7.04	1012	As548_TRINITY_DN15810_c0_g1	0	NA	NA	NA	7192	13502	4586	chr6B	521993230	96627	593	0	979	chr6B	521993440	94139	273
TRINITY_DN4096_c0_g1_i1	1052	2	NA	NA	NA	TRINITY_DN4096_c0_g1	2214	NA	NA	NA	NA	0	0	3.95	4537	0	4919	1821	0	3085	0.661	0.512	4629	1603	1272	4405	0.624	0.26	3505	1601	0.68	As548_TRINITY_DN132_c1_g2	0	NA	NA	NA	46332	29406	79001	NA	NA	NA	NA	NA	NA	NA	NA	NA	NA
TRINITY_DN4097_c0_g1_i7	1864	2	NA	NA	NA	TRINITY_DN4097_c0_g1	2622	NA	NA	NA	NA	0.677	1566	0.869	0.626	1875	0.517	2468	0.796	0.54	1128	1347	0.459	0.626	0	0.72	0.822	0.513	0	3042	0.443	As548_TRINITY_DN74587_c0_g1	0	NA	NA	NA	2148	2261	1229	NA	NA	NA	NA	NA	NA	NA	NA	NA	NA
TRINITY_DN4107_c0_g1_i17	1341	2	NA	NA	NA	TRINITY_DN4107_c0_g1	4268	NA	NA	NA	jcf7180001622619	0.339	1409	0.394	1974	4653	0.93	1342	2857	1672	4001	3942	2325	1232	5262	0.96	2726	2423	2.15	0.247	2648	As548_TRINITY_DN310_c0_g4	0	NA	NA	NA	2158	3035	2.39	chr6B	550077046	94958	833	0	1303	chr6B	550076044	100	244
TRINITY_DN4111_c0_g1_i28	2465	2	NA	NA	NA	TRINITY_DN4111_c0_g1	3618	NA	NA	NA	NA	1504	4.6	1911	0	4258	4661	0	2963	3427	1.41	1868	3221	1955	4.52	3176	1748	4495	3607	0	0.704	As548_TRINITY_DN70476_c0_g1	3.42e-30	NA	NA	NA	0	0	5849	chr6B	216626427	90625	192	1.75e-64	254	NA	NA	NA	NA
TRINITY_DN4111_c0_g1_i5	1885	2	NA	NA	NA	TRINITY_DN4111_c0_g1	3618	NA	NA	NA	NA	0.461	2866	1564	1276	4663	2873	0	3661	2139	0.759	4.13	2986	1114	5724	3042	1249	6602	3485	0.408	2387	As548_TRINITY_DN70476_c0_g1	3.42e-30	NA	NA	NA	0	0	5849	chr6B	216626427	90625	192	1.75e-64	254	NA	NA	NA	NA
TRINITY_DN4114_c0_g1_i8	2317	2	NA	NA	NA	TRINITY_DN4114_c0_g1	3250	NA	NA	NA	NA	0.163	0.674	0	0	1409	1075	2301	1424	0.935	0.531	0.628	0.928	0.508	1461	0.134	0	1538	0.856	0.763	0	As548_TRINITY_DN1731_c0_g1	0	NA	NA	NA	1928	4416	2982	NA	NA	NA	NA	NA	NA	NA	NA	NA	NA
TRINITY_DN41188_c0_g1_i3	1829	2	NA	NA	NA	TRINITY_DN41188_c0_g1	2217	NA	NA	NA	NA	0.271	1	0.73	0.722	0	0.517	0	2105	1.61	2104	1006	0.661	0.489	1575	0.768	0.656	2655	2.18	0.279	3715	As548_TRINITY_DN11839_c0_g1	0	NA	NA	NA	4575	8805	4347	NA	NA	NA	NA	NA	NA	NA	NA	NA	NA
TRINITY_DN4118_c0_g1_i10	2224	2	NA	NA	NA	TRINITY_DN4118_c0_g1	2675	NA	NA	NA	NA	1721	1987	0.243	0	1632	0.145	0.646	2414	0.364	0.119	2.46	0.448	0.42	4058	0.441	0.146	3575	0.061	0.236	1779	As548_TRINITY_DN6699_c0_g1	0	NA	NA	NA	2737	6008	3494	chr6S	108160909	95652	46	1.08e-10	75	NA	NA	NA	NA
TRINITY_DN4118_c0_g1_i3	1418	2	NA	NA	NA	TRINITY_DN4118_c0_g1	2675	NA	NA	NA	NA	0.244	1373	0.29	0	0.892	0	0.94	0.557	0	0	0.207	0.203	0.323	0.871	0.749	0.354	1601	0.937	0	1613	As548_TRINITY_DN6699_c0_g1	0	NA	NA	NA	2737	6008	3494	chr6S	108160909	95652	46	1.08e-10	75	NA	NA	NA	NA
TRINITY_DN4123_c0_g1_i5	2502	2	NA	NA	NA	TRINITY_DN4123_c0_g1	4745	NA	NA	NA	jcf7180001927965	0.474	1084	5.78	0	2281	1716	0.813	0.345	2835	0.651	1095	1749	1447	1757	5278	1.02	1145	1946	0.129	1336	As548_TRINITY_DN68147_c0_g1	1.11e-115	NA	NA	NA	0.35	1504	0	chr6S	5549330	79841	377	1.38e-66	261	chr6S	729384679	83333	246
TRINITY_DN4125_c0_g1_i4	2388	2	NA	NA	NA	TRINITY_DN4125_c0_g1	2898	NA	NA	NA	jcf7180001528010	0	2987	0.382	3478	1145	0.992	2027	2467	0.374	2873	0.207	1397	0.831	1931	0.489	1093	2465	2.69	3128	1257	As548_TRINITY_DN4855_c0_g1	0	NA	NA	NA	17022	13942	17833	chr6B	657941158	91453	117	8.73e-37	161	chr6B	657938474	92308	104
TRINITY_DN412_c0_g1_i1	2621	2	NA	NA	NA	TRINITY_DN412_c0_g1	4692	NA	NA	NA	NA	0.203	0	0.846	0	0	0.982	0	2768	1589	2537	0.817	1.12	0	2695	2361	2976	0	0.866	0	2269	As548_TRINITY_DN1684_c0_g1	0	NA	NA	NA	48969	65322	108055	NA	NA	NA	NA	NA	NA	NA	NA	NA	NA
TRINITY_DN41300_c0_g1_i7	1491	2	NA	NA	NA	TRINITY_DN41300_c0_g1	2310	NA	NA	NA	jcf7180001573245	0	0.277	0.521	0	0	0.145	0	0.389	0.249	0.26	0	0.139	0.479	0.333	0.106	0.541	0.337	0	0	0	As548_TRINITY_DN6012_c0_g1	0	NA	NA	NA	0.689	0.633	1525	chr6B	85108869	92727	55	2e-12	80.5	NA	NA	NA	NA
TRINITY_DN4132_c0_g1_i6	1438	2	NA	NA	NA	TRINITY_DN4132_c0_g1	2553	NA	NA	NA	NA	0	0	0.069	0.758	0.436	0.114	1577	0	0	0.824	0	0	0	1817	0	0.104	0	0	0	0	As548_TRINITY_DN5219_c0_g1	0	NA	NA	NA	11458	11057	7044	NA	NA	NA	NA	NA	NA	NA	NA	NA	NA
TRINITY_DN4134_c0_g1_i2	3322	2	NA	NA	NA	TRINITY_DN4134_c0_g1	4246	NA	NA	NA	NA	1.03	3769	1089	2.19	0.831	0.692	0	3255	1475	1019	3816	0.96	1672	3195	1152	3746	4383	0	3568	2798	As548_TRINITY_DN171_c0_g2	0	NA	NA	NA	11928	14382	6418	NA	NA	NA	NA	NA	NA	NA	NA	NA	NA
TRINITY_DN41368_c0_g1_i8	992	2	NA	NA	NA	TRINITY_DN41368_c0_g1	1625	NA	NA	NA	NA	0.203	0.915	0.475	0	1216	0.548	1253	1132	0.862	1366	0.835	0.64	0.147	1764	0.806	0.988	1.04	0	1526	0.53	As548_TRINITY_DN14000_c0_g1	0	NA	NA	NA	0.739	0.809	1.57	NA	NA	NA	NA	NA	NA	NA	NA	NA	NA
TRINITY_DN4151_c0_g1_i8	1931	2	NA	NA	NA	TRINITY_DN4151_c0_g1	2736	NA	NA	NA	jcf7180001909513	0	0	0.568	0.59	0.264	0.217	0	0	0.602	0	0.26	0.448	0	0	0.25	0.291	0	0	0	0	As548_TRINITY_DN73429_c0_g1	0	NA	NA	NA	29799	20909	57743	chr6S	796046939	88631	906	0	1027	chr6S	796045500	94769	325
TRINITY_DN4156_c0_g1_i4	3317	2	NA	NA	NA	TRINITY_DN4156_c0_g1	3883	NA	NA	NA	NA	0.921	0.614	1089	0	0.466	1581	0.47	0.601	1672	0.867	1311	1205	1046	1075	2217	0.78	0.997	1467	0	0.585	As548_TRINITY_DN8369_c0_g1	0	NA	NA	NA	7412	6289	5519	NA	NA	NA	NA	NA	NA	NA	NA	NA	NA
TRINITY_DN4161_c1_g1_i5	489	2	NA	NA	NA	TRINITY_DN4161_c1_g1	684	NA	NA	NA	NA	0	0.53	0.88	0	0	1064	0	1088	0.623	0	0	1162	0	0	1161	0	0.19	0	0	0	As548_TRINITY_DN5194_c0_g2	2.48e-144	NA	NA	NA	1349	2956	6532	NA	NA	NA	NA	NA	NA	NA	NA	NA	NA
TRINITY_DN41657_c0_g1_i9	1138	2	NA	NA	NA	TRINITY_DN41657_c0_g1	2209	NA	NA	NA	jcf7180001712040	0.501	0.554	0.035	0	0.436	0.837	0	0	1039	0.477	0.072	0	0	0.083	0.701	0	0.534	0.306	0	0.553	As548_TRINITY_DN7626_c0_g5	3.13e-103	NA	NA	NA	1209	1592	2515	chr6S	475864812	96145	441	0	713	chr6S	475865282	99479	192
TRINITY_DN41727_c0_g1_i6	209	2	NA	NA	NA	TRINITY_DN41727_c0_g1	1156	NA	NA	NA	NA	0	49.75	0	0	0	0	0	0	0	0	0	0	0	0	0	0	0	0	0	0	As548_TRINITY_DN5631_c0_g1	2.27e-47	NA	NA	NA	3746	0	1092	chr6B	508172048	99324	148	1.96e-69	268	NA	NA	NA	NA
TRINITY_DN4176_c0_g1_i2	3455	2	NA	NA	NA	TRINITY_DN4176_c0_g1	5129	NA	NA	NA	NA	1545	2842	0.741	0	1216	1189	0	0.734	1153	1626	1086	0.992	1.3	2635	2159	0.687	4081	2.14	0	0.957	As548_TRINITY_DN3939_c0_g1	0	NA	NA	NA	9.63	6351	7693	NA	NA	NA	NA	NA	NA	NA	NA	NA	NA
TRINITY_DN41780_c0_g1_i1	823	2	NA	NA	NA	TRINITY_DN41780_c0_g1	1335	NA	NA	NA	NA	0.488	0.482	2166	0	1804	0.982	0	1972	3157	0.835	0.53	2.09	0.225	0	2505	0.676	1377	3393	0	0.664	As548_TRINITY_DN88160_c0_g1	6.95e-83	NA	NA	NA	0	0	5645	NA	NA	NA	NA	NA	NA	NA	NA	NA	NA
TRINITY_DN4178_c0_g1_i6	1175	2	NA	NA	NA	TRINITY_DN4178_c0_g1	1552	NA	NA	NA	NA	0	0.337	0	0	0	0.093	0	2246	2887	0	0	0	0.088	0.167	0.489	0	0.541	0.54	0	0	As548_TRINITY_DN15354_c0_g1	1.35e-85	NA	NA	NA	34334	42187	43962	NA	NA	NA	NA	NA	NA	NA	NA	NA	NA
TRINITY_DN4195_c0_g1_i13	5137	2	NA	NA	NA	TRINITY_DN4195_c0_g1	5531	NA	NA	NA	jcf7180001744987	0.65	0	1124	0	0.091	0.424	0	0	0.727	0.239	0	1301	0.577	1416	0.844	0.77	1.11	0.571	0	0	As548_TRINITY_DN7378_c0_g1	0	NA	NA	NA	3257	1847	2868	chr6S	457480807	96296	135	9.8e-54	219	chr6S	457480429	90446	157
TRINITY_DN41982_c0_g1_i1	1710	2	NA	NA	NA	TRINITY_DN41982_c0_g1	2526	NA	NA	NA	NA	0.732	1108	0.208	0.505	0.882	0.413	0.617	0.796	0.228	0	0.512	0.48	0.499	0.386	0.317	1238	1011	0	0.72	1391	As548_TRINITY_DN90889_c0_g1	0	NA	NA	NA	2707	7283	0.307	NA	NA	NA	NA	NA	NA	NA	NA	NA	NA
TRINITY_DN4205_c0_g1_i11	2077	2	NA	NA	NA	TRINITY_DN4205_c0_g1	3215	NA	NA	NA	NA	0.366	1096	0.683	0	2484	0.269	1547	2839	1361	0.933	2514	0.384	0.792	1476	0.844	1082	2606	0.846	0	0.569	As548_TRINITY_DN1447_c0_g1	0	NA	NA	NA	3986	4715	3699	NA	NA	NA	NA	NA	NA	NA	NA	NA	NA
TRINITY_DN4206_c0_g1_i2	1715	2	NA	NA	NA	TRINITY_DN4206_c0_g1	2015	NA	NA	NA	jcf7180001941553	0	0.422	0.104	0	0.598	0.351	0	0	0.197	0	0.18	0.235	0.645	0.606	0.106	0.229	0.569	0.346	0	0.237	As548_TRINITY_DN964_c0_g4	1.65e-125	NA	NA	NA	0	9826	0	chr6B	489707853	94212	501	0	750	NA	NA	NA	NA
TRINITY_DN4219_c0_g1_i8	1447	2	NA	NA	NA	TRINITY_DN4219_c0_g1	2239	NA	NA	NA	NA	0	2397	8513	11723	5.19	3204	8304	12036	12806	2.83	13297	9172	8886	7541	0	6774	12847	6898	25375	12182	As548_TRINITY_DN16170_c0_g1	0	NA	NA	NA	13895	22009	10367	NA	NA	NA	NA	NA	NA	NA	NA	NA	NA
TRINITY_DN42244_c0_g1_i5	998	2	NA	NA	NA	TRINITY_DN42244_c0_g1	2169	NA	NA	NA	NA	0	0.747	0.371	0.373	0.527	0.31	0.225	0.469	0.322	0	1059	0.875	1134	0	0.355	0.468	0.218	0.55	0.838	0	As548_TRINITY_DN17781_c0_g1	0	NA	NA	NA	1199	4398	4586	NA	NA	NA	NA	NA	NA	NA	NA	NA	NA
TRINITY_DN42374_c0_g1_i1	2154	2	NA	NA	NA	TRINITY_DN42374_c0_g1	2154	NA	NA	NA	jcf7180001939100	0.596	0.638	0.614	0.289	0.568	1023	0.333	0.557	1018	0.401	0.207	0.896	0.371	0.507	0.825	0.416	0.45	0.479	0.15	0.411	As548_TRINITY_DN32146_c0_g1	0	NA	NA	NA	0.24	0.176	1.07	chr6B	690730482	99074	864	0	1548	chr6B	690732148	99253	669
TRINITY_DN4244_c0_g1_i20	1699	2	NA	NA	NA	TRINITY_DN4244_c0_g1	3608	NA	NA	NA	NA	5569	16065	1413	2395	35368	1943	3192	29919	3303	0.336	48143	3.37	2014	24335	1929	4.12	23705	2904	2.15	25344	As548_TRINITY_DN1781_c0_g1	0	NA	NA	NA	13456	35.74	13042	NA	NA	NA	NA	NA	NA	NA	NA	NA	NA
TRINITY_DN4244_c0_g1_i21	1714	2	NA	NA	NA	TRINITY_DN4244_c0_g1	3608	NA	NA	NA	NA	3401	13308	0.683	1.24	23.66	0.899	0.969	20801	2316	2049	36983	1258	0.792	13719	1487	1165	17314	3067	1773	37328	As548_TRINITY_DN1781_c0_g1	0	NA	NA	NA	13456	35.74	13042	NA	NA	NA	NA	NA	NA	NA	NA	NA	NA
TRINITY_DN4244_c0_g1_i6	1660	2	NA	NA	NA	TRINITY_DN4244_c0_g1	3608	NA	NA	NA	NA	2.29	8526	0.927	1.24	40659	3007	2066	42035	0.291	2331	8772	1354	3509	17876	2351	2622	26255	3026	7889	25328	As548_TRINITY_DN1781_c0_g1	0	NA	NA	NA	13456	35.74	13042	NA	NA	NA	NA	NA	NA	NA	NA	NA	NA
TRINITY_DN4246_c0_g2_i4	1238	2	NA	NA	NA	TRINITY_DN4246_c0_g2	1772	NA	NA	NA	jcf7180001615747	0.447	0.301	0.579	0	0	0	0	1088	0	0	0.171	0	0	0	0.077	0.364	0.246	0	0.763	0	As548_TRINITY_DN19287_c0_g1	1.16e-101	NA	NA	NA	1798	3316	4484	NA	NA	NA	NA	NA	NA	NA	NA	NA	NA
TRINITY_DN424_c0_g1_i10	2993	2	NA	NA	NA	TRINITY_DN424_c0_g1	4868	NA	NA	NA	jcf7180001592308	0.176	0.951	0.208	0	0.487	0.806	0	1716	0.239	1984	0.045	0.629	1202	2385	1027	2487	1615	0.346	0	0.443	As548_TRINITY_DN485_c0_g1	0	NA	NA	NA	5564	15675	9832	chr6B	49502885	97436	39	3.3e-08	67.6	NA	NA	NA	NA
TRINITY_DN42532_c0_g2_i1	251	2	NA	NA	NA	TRINITY_DN42532_c0_g2	251	NA	NA	NA	jcf7180001893769	0	0	7842	0	0	0	0	0	0	46.68	6375	4362	0	0	0	0	6258	0	0	0	As548_TRINITY_DN25625_c1_g1	3.74e-09	NA	NA	NA	1538	1592	1388	chr6B	140754322	91447	152	8.6e-52	207	chr6B	545597923	88.06	67
TRINITY_DN4254_c0_g1_i7	1705	2	NA	NA	NA	TRINITY_DN4254_c0_g1	2297	NA	NA	NA	NA	0	0.975	1344	2588	0	1829	0.862	0.088	0.727	1117	0.952	1397	0.303	0.803	1564	1467	0.281	4595	0	0	As548_TRINITY_DN7160_c0_g1	0	NA	NA	NA	3187	5.41	5019	NA	NA	NA	NA	NA	NA	NA	NA	NA	NA
TRINITY_DN4260_c0_g1_i7	2586	2	NA	NA	NA	TRINITY_DN4260_c0_g1	3509	NA	NA	NA	jcf7180001889542	2005	0	2548	0.253	0.112	0.393	1567	0.177	1464	1453	0.826	3733	2268	0.56	2543	2008	0.281	3189	1709	0.506	As548_TRINITY_DN21309_c0_g1	0	NA	NA	NA	16193	2357	32889	chr6B	172265020	99771	437	0	802	chr6B	172265604	93516	401
TRINITY_DN42653_c0_g1_i1	1797	2	NA	NA	NA	TRINITY_DN42653_c0_g1	2185	NA	NA	NA	NA	1504	0.988	2004	1962	0.405	1984	0.95	0	2825	2212	0.557	2656	1623	0.22	1104	1904	0.091	0.937	1827	0.379	As548_TRINITY_DN36255_c0_g1	0	NA	NA	NA	3866	2824	2788	NA	NA	NA	NA	NA	NA	NA	NA	NA	NA
TRINITY_DN42731_c0_g1_i7	1441	2	NA	NA	NA	TRINITY_DN42731_c0_g1	1985	NA	NA	NA	NA	0	0.759	0	0	0	0.093	0	0	0	0	0	0.224	0.342	0.091	0.278	0	0	0	0	0.617	As548_TRINITY_DN32059_c0_g1	0	NA	NA	NA	0	0.968	0.558	NA	NA	NA	NA	NA	NA	NA	NA	NA	NA
TRINITY_DN4282_c0_g1_i6	1719	2	NA	NA	NA	TRINITY_DN4282_c0_g1	2163	NA	NA	NA	NA	2547	2.77	0.417	0.205	1662	1199	0	0	0.197	1908	3017	1557	1857	1673	1468	1571	1257	0.978	2386	1257	As548_TRINITY_DN6203_c1_g1	0	NA	NA	NA	3317	4574	3.46	NA	NA	NA	NA	NA	NA	NA	NA	NA	NA
TRINITY_DN4285_c0_g1_i11	2914	2	NA	NA	NA	TRINITY_DN4285_c0_g1	3190	NA	NA	NA	NA	0.163	0	0.973	0	1024	0.083	0	0	0.883	0	0	0.469	0.068	0	0.48	0	0	1977	0.279	0	As548_TRINITY_DN887_c0_g1	0	NA	NA	NA	4455	5155	3482	NA	NA	NA	NA	NA	NA	NA	NA	NA	NA
TRINITY_DN4285_c0_g1_i3	2428	2	NA	NA	NA	TRINITY_DN4285_c0_g1	3190	NA	NA	NA	NA	0	1.18	0.857	0	1662	1137	1342	0.61	1028	0.51	0.44	0.629	0.938	1401	1094	0.687	1159	1375	1311	0.68	As548_TRINITY_DN887_c0_g1	0	NA	NA	NA	4455	5155	3482	NA	NA	NA	NA	NA	NA	NA	NA	NA	NA
TRINITY_DN4291_c0_g1_i7	1804	2	NA	NA	NA	TRINITY_DN4291_c0_g1	3228	NA	NA	NA	NA	1043	1409	0	0.505	0	0	0	0.363	0	0.596	0.009	0	0	0.787	0	0	0	0	0	0	As548_TRINITY_DN7871_c0_g1	0	NA	NA	NA	2298	2498	3004	NA	NA	NA	NA	NA	NA	NA	NA	NA	NA
TRINITY_DN4293_c1_g1_i2	4421	2	NA	NA	NA	TRINITY_DN4293_c1_g1	4981	NA	NA	NA	jcf7180001890180	0	0.422	0.151	0	0.253	0.455	0	0.292	0.125	0.217	0.602	0.128	0.098	0	0.163	0.343	0.035	0.54	0.312	0.158	As548_TRINITY_DN9342_c0_g1	0	NA	NA	NA	2427	1865	3596	chr6B	183180743	95422	415	0	660	chr6B	183182951	95143	350
TRINITY_DN4293_c1_g1_i7	4666	2	NA	NA	NA	TRINITY_DN4293_c1_g1	4981	NA	NA	NA	jcf7180001890180	0.65	1204	0.892	0.373	0.821	1147	0.431	0.407	1412	0.304	1113	1269	1202	1.62	1.42	0.895	1313	0.886	0	0.656	As548_TRINITY_DN9342_c0_g1	0	NA	NA	NA	2427	1865	3596	chr6B	183180743	95422	415	0	660	chr6B	183182951	95143	350
TRINITY_DN4297_c0_g1_i1	7109	2	NA	NA	NA	TRINITY_DN4297_c0_g1	7316	NA	NA	NA	NA	0.962	2204	2131	0.397	1125	2263	1449	1433	1901	0.726	1401	2133	2033	1514	2783	1831	1.04	0.102	0.645	0.466	As548_TRINITY_DN18983_c0_g1	0	NA	NA	NA	7332	4442	9366	NA	NA	NA	NA	NA	NA	NA	NA	NA	NA
TRINITY_DN429_c0_g1_i13	2741	2	NA	NA	NA	TRINITY_DN429_c0_g1	6540	NA	NA	NA	jcf7180001892604	0.041	0.783	1367	0.217	1825	0.734	0.392	0.433	1246	1193	0.108	0.448	0.714	0.757	1449	0.531	0.625	0.316	1569	0.538	As548_TRINITY_DN80_c0_g1	0	NA	NA	NA	252296	46155	94774	chr6S	725386630	98404	188	1.43e-87	331	chr6S	725386971	94086	186
TRINITY_DN4300_c0_g1_i1	2042	2	NA	NA	NA	TRINITY_DN4300_c0_g1	2729	NA	NA	NA	NA	1287	2698	1876	1047	1875	2263	0	2123	2088	0.466	1948	2.09	3187	2196	2341	2768	3428	2557	1419	2846	As548_TRINITY_DN26455_c0_g1	0	NA	NA	NA	4585	4513	4746	NA	NA	NA	NA	NA	NA	NA	NA	NA	NA
TRINITY_DN4301_c0_g1_i5	3086	2	NA	NA	NA	TRINITY_DN4301_c0_g1	4547	NA	NA	NA	jcf7180001533959	0	0.409	0	0	0	0	0	0	0	0	0	0.299	0	0	0	0	0	0	0	0	As548_TRINITY_DN8532_c0_g1	0	NA	NA	NA	11658	11119	11471	chr6B	594656518	98262	1381	0	2418	chr6B	594655390	98896	1178
TRINITY_DN4309_c0_g1_i1	1693	2	NA	NA	NA	TRINITY_DN4309_c0_g1	2131	NA	NA	NA	NA	0.881	1746	0	0	0.76	0.444	0	1176	0.488	0	0.934	0.395	1378	1469	0.384	0.728	0.555	0.754	0	0	As548_TRINITY_DN6058_c0_g1	0	NA	NA	NA	6174	3862	3494	NA	NA	NA	NA	NA	NA	NA	NA	NA	NA
TRINITY_DN4317_c0_g1_i11	1031	2	NA	NA	NA	TRINITY_DN4317_c0_g1	2951	NA	NA	NA	NA	0.745	1999	1668	2756	2869	2966	0	1017	2378	0.651	2379	2.56	1114	2559	2975	0.978	3378	0	0.838	2949	As548_TRINITY_DN2662_c0_g1	0	NA	NA	NA	12936	26143	22442	NA	NA	NA	NA	NA	NA	NA	NA	NA	NA
TRINITY_DN43423_c0_g1_i11	852	2	NA	NA	NA	TRINITY_DN43423_c0_g1	2788	NA	NA	NA	jcf7180001528045	0	0	0.058	0	0.618	0.165	0	0	0.073	0	0	0.192	0.039	0	0	0.312	0.035	0	0	0	As548_TRINITY_DN17489_c0_g1	1.29e-172	NA	NA	NA	4286	2006	1559	chr6S	537459818	86667	255	1.03e-70	274	chr6S	791353916	87692	65
TRINITY_DN43736_c1_g1_i1	242	2	NA	NA	NA	TRINITY_DN43736_c1_g1	242	NA	NA	NA	NA	0	16005	0	0	0	0	0	0	0	0	0	0	0	0	3522	0	0	0	0	0	As548_TRINITY_DN15556_c0_g2	7.04e-76	NA	NA	NA	0.879	0.95	1309	NA	NA	NA	NA	NA	NA	NA	NA	NA	NA
TRINITY_DN44163_c0_g1_i6	454	2	NA	NA	NA	TRINITY_DN44163_c0_g1	967	NA	NA	NA	jcf7180001793360	0.677	0	1459	0	1257	1426	6003	2485	2067	0	0.584	4415	0.381	2143	1823	1561	0.857	4707	0	1652	As548_TRINITY_DN96971_c0_g1	1.82e-72	NA	NA	NA	0	0.405	1115	chr6B	366781601	78783	608	3.4e-96	357	NA	NA	NA	NA
TRINITY_DN441_c0_g1_i2	2456	2	NA	NA	NA	TRINITY_DN441_c0_g1	5602	NA	NA	NA	NA	0	0	0.116	0	0	0.041	0	0	0	0	0	0	0.714	0	1238	0.166	0	0	0	0	As548_TRINITY_DN50135_c0_g1	0	NA	NA	NA	1239	3404	0.319	chr6S	38767426	75978	179	8.12e-15	89.8	NA	NA	NA	NA
TRINITY_DN4427_c0_g1_i15	1158	2	NA	NA	NA	TRINITY_DN4427_c0_g1	4163	NA	NA	NA	NA	0.65	1252	0.371	0	1257	0.217	0	0.92	0.405	0	1.85	0.203	1632	1613	0.796	0.708	1152	0.071	0	0.372	As548_TRINITY_DN4778_c0_g1	0	NA	NA	NA	6104	4038	2026	chr6B	684764345	82301	113	1.67e-15	91.6	NA	NA	NA	NA
TRINITY_DN4429_c0_g1_i4	4116	2	NA	NA	NA	TRINITY_DN4429_c0_g1	4297	NA	NA	NA	NA	0.352	2662	3336	0	1.49	4237	0.147	1557	4632	1377	1284	4.98	1623	1545	4453	2404	2964	2455	0.935	0.609	As548_TRINITY_DN13541_c0_g1	0	NA	NA	NA	1698	2366	5838	NA	NA	NA	NA	NA	NA	NA	NA	NA	NA
TRINITY_DN4439_c0_g1_i21	1674	2	NA	NA	NA	TRINITY_DN4439_c0_g1	2356	NA	NA	NA	jcf7180001891331	0.285	0	0.498	0.265	0.101	0.486	0	0.186	0.706	0.412	0.539	0.608	0	0	0.537	0.551	0.611	0	0.656	2.19	As548_TRINITY_DN5915_c0_g1	0	NA	NA	NA	10699	7187	10288	chr6B	112905732	93913	460	0	695	chr6B	112906965	96218	238
TRINITY_DN4441_c0_g1_i12	2539	2	NA	NA	NA	TRINITY_DN4441_c0_g1	3150	NA	NA	NA	jcf7180001892588	0.569	2782	1784	0	0.781	2098	3114	0.619	1786	1063	0.754	1749	2033	0.81	3224	1706	0.822	0.54	0	0	As548_TRINITY_DN4440_c0_g1	0	NA	NA	NA	14015	12289	26038	chr6B	551031802	97579	537	0	920	chr6B	551030909	83924	367
TRINITY_DN4445_c0_g1_i20	1192	2	NA	NA	NA	TRINITY_DN4445_c0_g1	2188	NA	NA	NA	NA	0	3179	2317	0.722	2484	2.16	1665	1424	2191	0	1598	1365	1975	1953	2409	1592	1608	1518	2579	2964	As548_TRINITY_DN1886_c0_g1	2.38e-109	NA	NA	NA	5834	2085	4723	NA	NA	NA	NA	NA	NA	NA	NA	NA	NA
TRINITY_DN4463_c0_g1_i13	3652	2	NA	NA	NA	TRINITY_DN4463_c0_g1	4151	NA	NA	NA	NA	2412	6443	2502	3009	3538	3245	1469	3334	1994	1561	5109	3231	6315	6829	3.33	4.63	9215	1997	0.86	3486	As548_TRINITY_DN597_c0_g1	0	NA	NA	NA	16862	12843	7.83	NA	NA	NA	NA	NA	NA	NA	NA	NA	NA
TRINITY_DN4475_c0_g1_i11	1039	2	NA	NA	NA	TRINITY_DN4475_c0_g1	2446	NA	NA	NA	NA	0.976	1457	0	0.012	1429	0.362	0	0.566	0.82	0	0.135	0.448	0.782	1484	0.595	1582	0.344	0	0.623	0.885	As548_TRINITY_DN8983_c0_g1	2.43e-174	NA	NA	NA	56371	11928	54648	NA	NA	NA	NA	NA	NA	NA	NA	NA	NA
TRINITY_DN4484_c0_g1_i10	2412	2	NA	NA	NA	TRINITY_DN4484_c0_g1	3427	NA	NA	NA	jcf7180001900271	0.068	0.012	0.116	0	0	0.382	0	0.256	0.499	0	0.162	0.448	0.547	0	0.873	0.187	0.274	0	0.451	0	As548_TRINITY_DN3383_c0_g1	0	NA	NA	NA	1678	0.792	1536	chr6B	68246730	83.82	445	9.3e-112	411	chr6B	68247097	92593	270
TRINITY_DN45255_c0_g1_i1	302	2	NA	NA	NA	TRINITY_DN45255_c0_g1	396	NA	NA	NA	NA	0	0	2409	0	0	0	0	0	0	0	0	0	0	0	0.345	0	0	0	0	0	As548_TRINITY_DN3917_c0_g2	3.47e-46	NA	NA	NA	33575	3149	0	NA	NA	NA	NA	NA	NA	NA	NA	NA	NA
TRINITY_DN45283_c0_g1_i1	2766	2	NA	NA	NA	TRINITY_DN45283_c0_g1	3115	NA	NA	NA	NA	0.257	0.361	0.116	0.578	0	0.341	0	0	0.104	1052	0.198	0.363	0	0.182	0.403	0	0.295	1049	0	0.64	As548_TRINITY_DN93844_c0_g1	0	NA	NA	NA	0.909	0.501	0.922	NA	NA	NA	NA	NA	NA	NA	NA	NA	NA
TRINITY_DN4550_c0_g1_i4	2205	2	NA	NA	NA	TRINITY_DN4550_c0_g1	2858	NA	NA	NA	NA	0	2457	1112	1456	0.436	1871	0	0	1786	0	0.763	2634	0.997	0.318	1852	1862	0.976	2068	0.398	0	As548_TRINITY_DN6173_c0_g1	0	NA	NA	NA	3267	2463	3528	NA	NA	NA	NA	NA	NA	NA	NA	NA	NA
TRINITY_DN4558_c0_g1_i18	3016	2	NA	NA	NA	TRINITY_DN4558_c0_g1	4441	NA	NA	NA	NA	0.176	0.891	0.208	0	0.456	0.134	0.206	0.115	0.54	0.586	0.314	0.245	0.655	0.553	0.883	0.104	0.555	0	0.204	0	As548_TRINITY_DN4471_c0_g1	0	NA	NA	NA	1309	0.73	1479	NA	NA	NA	NA	NA	NA	NA	NA	NA	NA
TRINITY_DN4558_c0_g1_i30	1902	2	NA	NA	NA	TRINITY_DN4558_c0_g1	4441	NA	NA	NA	NA	0	1421	0.579	0	0	0.145	0	0.991	0.8	0	0.359	0.885	0.479	0.159	0.921	0.343	0.723	0	0	0.403	As548_TRINITY_DN4471_c0_g1	0	NA	NA	NA	1309	0.73	1479	NA	NA	NA	NA	NA	NA	NA	NA	NA	NA
TRINITY_DN45592_c0_g1_i2	268	2	NA	NA	NA	TRINITY_DN45592_c0_g1	470	NA	NA	NA	NA	0	0	0.753	0	0	0	0	0	0	0	0	0.672	0	0	0	0	0	0	0	0	As548_TRINITY_DN22987_c0_g1	1.56e-15	NA	NA	NA	13046	0	9138	NA	NA	NA	NA	NA	NA	NA	NA	NA	NA
TRINITY_DN4559_c0_g1_i14	1708	2	NA	NA	NA	TRINITY_DN4559_c0_g1	3431	NA	NA	NA	NA	0.447	0.879	0.811	0	1257	1023	0.695	0.486	0.831	0	1.32	0.757	0.743	0.636	1065	2081	0.99	0	0	1178	As548_TRINITY_DN224_c0_g1	0	NA	NA	NA	6114	14611	11301	NA	NA	NA	NA	NA	NA	NA	NA	NA	NA
TRINITY_DN455_c1_g1_i5	2116	2	NA	NA	NA	TRINITY_DN455_c1_g1	3174	NA	NA	NA	jcf7180001864831	2994	2047	3452	2852	1956	2883	2879	1353	3261	2299	2029	2656	2991	0.924	2553	2934	1805	1518	1924	0.593	As548_TRINITY_DN8786_c0_g2	0	NA	NA	NA	10059	8638	6748	chr6B	525981541	98624	218	5.22e-104	385	NA	NA	NA	NA
TRINITY_DN4560_c0_g1_i1	964	2	NA	NA	NA	TRINITY_DN4560_c0_g1	2872	NA	NA	NA	NA	0	0.506	0	0	0	0	0	0	0	0	0	0	0	0	0	0	0	0	1537	0.648	As548_TRINITY_DN84_c0_g2	0	NA	NA	NA	13296	11.84	6453	NA	NA	NA	NA	NA	NA	NA	NA	NA	NA
TRINITY_DN4568_c0_g1_i12	2446	2	NA	NA	NA	TRINITY_DN4568_c0_g1	3103	NA	NA	NA	NA	0.786	3203	2479	0	2747	4217	0.264	0	3001	1735	1176	4.82	0.958	3066	5383	1644	3048	3393	0.204	2356	As548_TRINITY_DN504_c0_g2	0	NA	NA	NA	2757	6105	7841	NA	NA	NA	NA	NA	NA	NA	NA	NA	NA
TRINITY_DN4576_c0_g1_i3	2866	2	NA	NA	NA	TRINITY_DN4576_c0_g1	3412	NA	NA	NA	jcf7180001582958	0.474	1397	0.301	0.205	2595	0.351	0	2538	0.177	0.304	1724	0.235	1369	1666	0.307	0.978	2311	0.367	0.129	1723	As548_TRINITY_DN4610_c0_g1	0	NA	NA	NA	5095	8.7	4165	NA	NA	NA	NA	NA	NA	NA	NA	NA	NA
TRINITY_DN4578_c0_g1_i6	895	2	NA	NA	NA	TRINITY_DN4578_c0_g1	4003	NA	NA	NA	jcf7180001924454	0.732	1855	0.046	0	1521	0.258	0	0.513	0	0	0	0.117	0.714	1348	0	0.531	0.583	0	0	0	As548_TRINITY_DN1803_c0_g1	0	NA	NA	NA	9.9	20839	9.32	chr6B	398843273	99017	407	0	730	chr6B	398840339	98496	399
TRINITY_DN4579_c0_g1_i3	6441	2	NA	NA	NA	TRINITY_DN4579_c0_g1	7102	NA	NA	NA	jcf7180001928226	1938	4384	4251	0.662	3467	6191	1528	2069	5743	1442	2801	5247	4487	5724	4817	4037	4123	2058	0.516	1075	As548_TRINITY_DN15956_c0_g3	0	NA	NA	NA	3616	5.63	3915	chr6S	678403393	99055	1164	0	2089	chr6S	678382195	99728	367
TRINITY_DN4580_c0_g1_i3	2598	2	NA	NA	NA	TRINITY_DN4580_c0_g1	3725	NA	NA	NA	jcf7180001930234	0.23	0.59	1066	0.349	0.324	1767	0	0	1142	0	0.278	1706	0.538	0.121	1603	0.749	0.155	1589	0	0.016	As548_TRINITY_DN74222_c0_g2	0	NA	NA	NA	9011	0	27301	chr6B	715704754	96535	404	0	665	chr6B	715708739	96979	331
TRINITY_DN4585_c0_g1_i3	4426	2	NA	NA	NA	TRINITY_DN4585_c0_g1	5216	NA	NA	NA	NA	0.461	1337	0.046	0.505	1318	0.103	0	1946	0.208	0	2092	0.128	0.587	0.886	0.403	0.884	0.843	0.285	0	0.688	As548_TRINITY_DN5658_c0_g1	0	NA	NA	NA	7532	13054	9605	NA	NA	NA	NA	NA	NA	NA	NA	NA	NA
TRINITY_DN45886_c0_g1_i2	1174	2	NA	NA	NA	TRINITY_DN45886_c0_g1	1174	NA	NA	NA	NA	0.257	0.277	0.614	0	0.112	0.827	0	0.15	0.976	0.13	0	0.373	0.43	0.5	0.816	0.083	1454	1814	0.623	0	As548_TRINITY_DN9686_c0_g1	0	NA	NA	NA	0.11	0.809	1149	NA	NA	NA	NA	NA	NA	NA	NA	NA	NA
TRINITY_DN4594_c0_g1_i13	1483	2	NA	NA	NA	TRINITY_DN4594_c0_g1	3369	NA	NA	NA	jcf7180001561652	7181	9105	4471	7751	13888	4.94	4436	19235	5671	3437	21.01	4213	6725	16998	4155	7492	12439	2659	14305	19059	As548_TRINITY_DN63932_c0_g1	1.58e-162	NA	NA	NA	10819	32327	11562	NA	NA	NA	NA	NA	NA	NA	NA	NA	NA
TRINITY_DN4597_c0_g1_i18	1494	2	NA	NA	NA	TRINITY_DN4597_c0_g1	2790	NA	NA	NA	NA	0.42	0	2873	0.71	0.862	3576	0	0	2212	0	0	2698	1681	0	2821	1654	0.344	0.581	0	0.569	As548_TRINITY_DN1245_c0_g1	4.84e-142	NA	NA	NA	5494	4504	11494	chr6S	802349451	88506	87	1.44e-19	104	chr6S	733424076	88372	86
TRINITY_DN4597_c0_g1_i34	1521	2	NA	NA	NA	TRINITY_DN4597_c0_g1	2790	NA	NA	NA	jcf7180001581245	0	0	2942	0	0.253	0.424	0	0	1693	0.325	0.269	0	1457	0.348	0	0.021	0	0.01	0.15	0	As548_TRINITY_DN1245_c0_g1	4.84e-142	NA	NA	NA	5494	4504	11494	chr6S	802349451	88506	87	1.44e-19	104	chr6S	733424076	88372	86
TRINITY_DN4617_c0_g1_i6	1757	2	NA	NA	NA	TRINITY_DN4617_c0_g1	2747	NA	NA	NA	NA	2073	1156	3927	4417	1064	5.86	0.96	1176	5723	1789	0.646	6495	2825	0.424	7687	1665	1047	6755	4321	1431	As548_TRINITY_DN677_c0_g2	0	NA	NA	NA	4595	4073	15113	NA	NA	NA	NA	NA	NA	NA	NA	NA	NA
TRINITY_DN46251_c0_g3_i2	879	2	NA	NA	NA	TRINITY_DN46251_c0_g3	1170	NA	NA	NA	NA	0.257	0.145	0.29	0	0	0.641	0	0.283	0.841	0	0	0.683	0.215	0.379	1651	0.687	0.162	1111	0.312	0	As548_TRINITY_DN3863_c1_g1	2.83e-81	NBSLRR	519	2789	1419	0.211	3903	NA	NA	NA	NA	NA	NA	NA	NA	NA	NA
TRINITY_DN4642_c0_g1_i4	4234	2	NA	NA	NA	TRINITY_DN4642_c0_g1	5614	NA	NA	NA	jcf7180001703025	0	0.096	0.185	0	0	0.341	0.94	0	0.301	0.455	0.18	0.491	0.411	0	0.461	0	0.204	0	0	0	As548_TRINITY_DN3120_c1_g3	0	NA	NA	NA	2368	1557	1.65	NA	NA	NA	NA	NA	NA	NA	NA	NA	NA
TRINITY_DN4642_c0_g1_i5	5229	2	NA	NA	NA	TRINITY_DN4642_c0_g1	5614	NA	NA	NA	jcf7180001703025	0	0.482	0	0.361	0	0	0	0	0	0	0	0	0	0	0	0.375	0	0.183	0.086	1.17	As548_TRINITY_DN3120_c1_g3	0	NA	NA	NA	2368	1557	1.65	NA	NA	NA	NA	NA	NA	NA	NA	NA	NA
TRINITY_DN46485_c0_g1_i6	1134	2	NA	NA	NA	TRINITY_DN46485_c0_g1	1781	NA	NA	NA	jcf7180001914194	0	0.65	0.405	0	0	0.258	0	0	0.021	0.564	0.467	0	0.401	0.666	0.768	0.458	0	0	0.355	0	As548_TRINITY_DN15005_c0_g1	8.42e-153	NA	NA	NA	1019	7213	4791	NA	NA	NA	NA	NA	NA	NA	NA	NA	NA
TRINITY_DN4650_c0_g1_i5	1440	2	NBSLRR	178	747	TRINITY_DN4650_c0_g1	1745	NBSLRR	314	883	jcf7180001538869	0	0.12	0.359	0	0.436	1313	0	0.336	0.322	0.38	0	0.427	0.704	0.507	0.902	0.146	0.232	0	0	0	As548_TRINITY_DN1369_c1_g2	0	NBSLRR	1158	1727	9.47	28817	12029	chr6B	610817454	83.24	179	1.45e-37	163	NA	NA	NA	NA
TRINITY_DN4651_c0_g1_i7	1978	2	NA	NA	NA	TRINITY_DN4651_c0_g1	2208	NA	NA	NA	NA	0	3914	3012	1324	2271	2.15	0	1689	2129	2765	1131	1962	1691	2635	1737	2851	4334	2537	0.892	0.569	As548_TRINITY_DN1397_c0_g2	0	NA	NA	NA	7362	7107	10254	NA	NA	NA	NA	NA	NA	NA	NA	NA	NA
TRINITY_DN465_c0_g1_i21	1637	2	NA	NA	NA	TRINITY_DN465_c0_g1	3176	NA	NA	NA	NA	1924	4805	3.29	1011	7065	4268	2203	7102	4196	0.401	6132	4074	2972	4868	4721	2237	4.06	4096	0.849	0	As548_TRINITY_DN7641_c1_g1	0	NA	NA	NA	12117	17654	5849	NA	NA	NA	NA	NA	NA	NA	NA	NA	NA
TRINITY_DN4665_c0_g1_i4	1975	2	NA	NA	NA	TRINITY_DN4665_c0_g1	2534	NA	NA	NA	jcf7180001900320	0	1012	1459	0.927	0.841	1798	0	0.389	1734	0.792	0.162	1696	0	0.045	1948	0.177	0.351	0.479	0	0.451	As548_TRINITY_DN5946_c0_g1	0	NA	NA	NA	6343	4539	6384	chr6B	552400760	99634	273	1.42e-138	499	chr6B	552402602	98155	271
TRINITY_DN4686_c0_g1_i4	2132	2	NA	NA	NA	TRINITY_DN4686_c0_g1	2978	NA	NA	NA	jcf7180001531409	2303	3.24	1.32	1.36	5018	1984	2252	1406	2472	3329	2433	2037	3118	3248	1679	3663	4221	0	0	0	As548_TRINITY_DN4756_c0_g1	0	NA	NA	NA	5364	11858	7204	chr6S	496411847	94946	277	1.72e-118	433	chr6S	496411547	95154	227
TRINITY_DN4688_c0_g1_i11	777	2	NA	NA	NA	TRINITY_DN4688_c0_g1	2925	NA	NA	NA	NA	0	0	0.185	0	0	0	0	0	0	0	0	0	0	0	0	0	0.014	0	0	0	As548_TRINITY_DN1739_c0_g1	0	NA	NA	NA	5634	15262	4404	chr6B	707241539	92174	115	2.45e-37	163	chr6B	134669463	90722	97
TRINITY_DN4689_c0_g1_i6	2801	2	NA	NA	NA	TRINITY_DN4689_c0_g1	3822	NA	NA	NA	jcf7180001724185	1179	3228	2768	0.554	1754	2243	0	1822	3012	0	1796	2879	2.19	3437	2879	2268	3856	2476	0.279	1.96	As548_TRINITY_DN9019_c0_g1	0	NA	NA	NA	6533	5682	5679	chr6S	690385417	86087	115	5.45e-25	122	NA	NA	NA	NA
TRINITY_DN4696_c0_g1_i17	2531	2	NA	NA	NA	TRINITY_DN4696_c0_g1	3988	NA	NA	NA	jcf7180001930300	3076	3252	7054	5247	4866	10.17	2066	3449	16472	6397	3538	11721	1867	3278	5671	3975	2016	14519	3429	3771	As548_TRINITY_DN4212_c0_g1	0	NA	NA	NA	13945	13599	16126	chr6S	595345812	81754	285	2.52e-58	233	NA	NA	NA	NA
TRINITY_DN4729_c0_g1_i4	2178	2	NA	NA	NA	TRINITY_DN4729_c0_g1	3068	NA	NA	NA	NA	0	0.096	0.822	0	0.284	1251	0	0.018	0.862	0.401	0.431	0.992	0.86	1234	1535	0.853	1763	0	0	0	As548_TRINITY_DN2650_c0_g1	0	NA	NA	NA	3556	3642	5827	NA	NA	NA	NA	NA	NA	NA	NA	NA	NA
TRINITY_DN4744_c0_g1_i4	1064	2	NA	NA	NA	TRINITY_DN4744_c0_g1	2258	NA	NA	NA	NA	1206	5961	1911	0	3943	1509	0	5209	2077	1648	3995	2762	1476	3672	2936	0.916	5921	2761	0.473	3399	As548_TRINITY_DN513_c0_g1	0	NA	NA	NA	39599	41413	45578	NA	NA	NA	NA	NA	NA	NA	NA	NA	NA
TRINITY_DN4762_c0_g1_i3	936	2	NA	NA	NA	TRINITY_DN4762_c0_g1	1220	NA	NA	NA	jcf7180001533966	5393	6636	8.34	7943	6184	6.78	2487	10055	7.27	5.27	12319	10.11	5337	8965	7533	6.67	7319	18.89	2945	0.34	As548_TRINITY_DN64072_c0_g1	0	NA	NA	NA	15654	11444	29645	chr6B	576812590	99799	498	0	915	chr6B	576813088	91304	391
TRINITY_DN4770_c0_g1_i11	1410	2	NA	NA	NA	TRINITY_DN4770_c0_g1	1879	NA	NA	NA	NA	2439	4336	2073	3454	9894	5147	6855	3467	6221	11288	6078	6036	6393	5194	3416	6649	5078	10413	3353	2087	As548_TRINITY_DN15874_c0_g1	5.31e-155	NA	NA	NA	27331	36901	15579	NA	NA	NA	NA	NA	NA	NA	NA	NA	NA
TRINITY_DN4785_c0_g1_i4	1229	2	NA	NA	NA	TRINITY_DN4785_c0_g1	1803	NA	NA	NA	jcf7180001941540	5217	7924	2467	3538	12337	2356	6894	11.24	4279	4771	8072	3007	10469	10108	2034	7845	12186	6796	6169	4387	As548_TRINITY_DN25571_c0_g1	8.35e-168	NA	NA	NA	4865	7248	3778	chr6B	190376287	91253	423	4.59e-152	544	chr6B	190377061	100	206
TRINITY_DN4837_c0_g1_i24	956	2	NA	NA	NA	TRINITY_DN4837_c0_g1	7477	NA	NA	NA	jcf7180001566383	1463	2035	0.278	0	2332	0.62	0.734	0	0.613	0.39	2011	0.864	0.987	1.09	0.921	2945	1342	0.754	0.666	0.53	As548_TRINITY_DN1009_c0_g1	0	NA	NA	NA	14245	14496	5497	NA	NA	NA	NA	NA	NA	NA	NA	NA	NA
TRINITY_DN4848_c0_g1_i5	2096	2	NA	NA	NA	TRINITY_DN4848_c0_g1	2753	NA	NA	NA	jcf7180001933168	0.447	0.325	0.475	0	0	0.765	0	1.22	0.332	2787	1086	0.139	1867	1264	0.71	0.916	0.428	0.988	3278	3194	As548_TRINITY_DN609_c1_g2	0	NA	NA	NA	10149	8858	6635	chr6S	657170150	92116	482	0	662	chr6S	657170777	98889	270
TRINITY_DN4855_c0_g1_i1	3734	2	NBSLRR	413	3385	TRINITY_DN4855_c0_g1	4160	NBSLRR	413	3811	NA	1.45	3649	4124	2034	6701	7162	0	4944	10334	1832	6527	7636	1525	4.24	5345	1935	6.35	5339	0.494	5194	As548_TRINITY_DN22701_c0_g1	0	NBSLRR	331	3306	1598	2929	4017	NA	NA	NA	NA	NA	NA	NA	NA	NA	NA
TRINITY_DN4858_c0_g1_i8	1118	2	NA	NA	NA	TRINITY_DN4858_c0_g1	2333	NA	NA	NA	NA	0.19	1578	0	0	0	0	0	0	0	0	0	0	0	0	0	0.656	0	0.479	0	0	As548_TRINITY_DN10105_c0_g1	0	NA	NA	NA	2927	2428	1457	NA	NA	NA	NA	NA	NA	NA	NA	NA	NA
TRINITY_DN485_c0_g1_i8	958	2	NA	NA	NA	TRINITY_DN485_c0_g1	1291	NA	NA	NA	jcf7180001889378	0.257	1084	0	0	0	0.083	0	0	0.384	0.9	0.997	0.917	0.342	1166	0.365	0	0.337	0	0	0	As548_TRINITY_DN403_c0_g1	3.77e-130	NA	NA	NA	73263	122622	71991	chr6B	524063855	90492	589	0	741	chr6B	524063469	88971	136
TRINITY_DN4868_c0_g1_i5	2519	2	NA	NA	NA	TRINITY_DN4868_c0_g1	2614	NA	NA	NA	NA	0.325	1349	0.718	0.205	0.892	0.672	0	0.389	0.28	0.13	0.709	0.288	0.293	0.613	0.384	0.874	0.478	0.723	0.118	0.672	As548_TRINITY_DN6346_c0_g1	0	NA	NA	NA	0.959	2445	1.4	NA	NA	NA	NA	NA	NA	NA	NA	NA	NA
TRINITY_DN4868_c0_g1_i9	1795	2	NA	NA	NA	TRINITY_DN4868_c0_g1	2614	NA	NA	NA	NA	0.948	1084	0	0	1064	0.238	0	0.106	0.81	0.184	0	0	0	0.386	0.47	0.375	0.934	0.082	0.301	0	As548_TRINITY_DN6346_c0_g1	0	NA	NA	NA	0.959	2445	1.4	NA	NA	NA	NA	NA	NA	NA	NA	NA	NA
TRINITY_DN4882_c0_g1_i16	2416	2	NA	NA	NA	TRINITY_DN4882_c0_g1	4528	NA	NA	NA	NA	0	0	0.093	0	0	0	0	0.867	0	0.878	0.862	0	0.411	0	0	0.416	0.351	0	2526	0	As548_TRINITY_DN653_c0_g1	0	NA	NA	NA	22267	24507	15568	NA	NA	NA	NA	NA	NA	NA	NA	NA	NA
TRINITY_DN4903_c0_g1_i4	1806	2	NA	NA	NA	TRINITY_DN4903_c0_g1	2551	NA	NA	NA	NA	0.921	1325	1286	2106	1622	0.558	2154	2883	0.478	0.184	2622	0.373	1544	2907	0.509	0.416	1.58	0	1322	0	As548_TRINITY_DN6148_c0_g1	0	NA	NA	NA	2567	13362	4006	NA	NA	NA	NA	NA	NA	NA	NA	NA	NA
TRINITY_DN49080_c0_g2_i3	2073	2	NA	NA	NA	TRINITY_DN49080_c0_g2	2431	NA	NA	NA	jcf7180001587947	0	0	0.058	0	0	0	0	0	0	0	0	0.181	0	0.333	0.278	0	0.07	0	0	0	As548_TRINITY_DN6136_c0_g1	0	NA	NA	NA	1059	2868	1.32	chr6S	14715755	85393	178	5.61e-43	182	chr6S	56808163	89286	84
TRINITY_DN490_c0_g1_i8	876	2	NA	NA	NA	TRINITY_DN490_c0_g1	3349	NA	NA	NA	NA	2751	1578	3764	1697	3659	4031	2536	2901	5743	3101	3582	4746	2053	3082	5.47	2986	2346	4554	3138	4103	As548_TRINITY_DN4389_c0_g1	0	NA	NA	NA	5824	24172	17059	NA	NA	NA	NA	NA	NA	NA	NA	NA	NA
TRINITY_DN49133_c0_g1_i1	3993	2	NA	NA	NA	TRINITY_DN49133_c0_g1	4644	NA	NA	NA	NA	0.163	0	0.73	0	0	0.093	0	0.256	0.519	0	0	0.523	0	0.189	0.384	0.343	0.042	0	0	0	As548_TRINITY_DN4779_c0_g1	0	NA	NA	NA	4016	0.994	3608	NA	NA	NA	NA	NA	NA	NA	NA	NA	NA
TRINITY_DN49347_c0_g1_i2	237	2	NA	NA	NA	TRINITY_DN49347_c0_g1	460	NA	NA	NA	NA	0	16631	0	0	0	0	0	0	0	0	0	0	0	13424	0	0	0	0	0	0	As548_TRINITY_DN24621_c0_g2	4.07e-46	NA	NA	NA	3856	2709	8547	NA	NA	NA	NA	NA	NA	NA	NA	NA	NA
TRINITY_DN4971_c1_g1_i5	4260	2	NA	NA	NA	TRINITY_DN4971_c1_g1	4487	NA	NA	NA	NA	0.135	1108	1124	0	1561	1199	0.783	0.876	1153	0.716	0.305	1066	1212	0.734	1334	0.458	1377	0	0.903	2364	As548_TRINITY_DN3201_c0_g1	0	NA	NA	NA	2657	3932	2.72	NA	NA	NA	NA	NA	NA	NA	NA	NA	NA
TRINITY_DN49735_c0_g1_i2	716	2	NA	NA	NA	TRINITY_DN49735_c0_g1	828	NA	NA	NA	NA	0	0.65	1112	1.36	0	0.63	0	0.991	0.447	0.564	0.242	0.352	1212	0	0.288	0.874	0.281	2.15	0.086	0	As548_TRINITY_DN55619_c0_g1	3.99e-128	NA	NA	NA	0	1064	0.626	NA	NA	NA	NA	NA	NA	NA	NA	NA	NA
TRINITY_DN499_c0_g1_i1	1703	2	NA	NA	NA	TRINITY_DN499_c0_g1	5536	NA	NA	NA	jcf7180001521631	1341	0.434	1923	2648	1561	0.94	0	1.07	1963	3567	1095	2112	1564	0.598	1171	1394	0.618	3413	0	0.822	As548_TRINITY_DN1065_c0_g1	4.23e-180	NA	NA	NA	6813	13.01	6293	chr6B	227521720	97.5	240	1.51e-111	411	chr6B	565754575	97.5	240
TRINITY_DN5006_c0_g1_i19	3727	2	NA	NA	NA	TRINITY_DN5006_c0_g1	6930	NA	NA	NA	jcf7180001549916	0	0.686	0.44	0	0	0.734	0	0	0	0.445	0	0.363	0.401	0.174	0.259	0.291	0.33	0	0	0.332	As548_TRINITY_DN3707_c0_g1	0	NA	NA	NA	14355	21331	3824	chr6B	395675460	97333	150	9.37e-65	255	chr6B	288946785	92079	101
TRINITY_DN5013_c0_g1_i16	2550	2	NA	NA	NA	TRINITY_DN5013_c0_g1	5365	NA	NA	NA	NA	0.813	1674	3.44	0.806	1855	3.69	1733	0.23	3001	2.44	1248	4277	1935	1219	3119	1998	1601	2241	0.344	2071	As548_TRINITY_DN99936_c0_g1	0	NA	NA	NA	7882	8022	17526	NA	NA	NA	NA	NA	NA	NA	NA	NA	NA
TRINITY_DN5015_c0_g1_i6	3399	2	NA	NA	NA	TRINITY_DN5015_c0_g1	4084	NA	NA	NA	jcf7180001892149	3022	4.36	2.27	0	2423	2491	1185	1512	2773	1832	2496	3669	3666	3952	2764	4661	3224	0.785	0.258	1249	As548_TRINITY_DN1943_c0_g1	0	NA	NA	NA	6164	5515	4928	chr6B	175337921	95979	373	6.14e-169	601	chr6B	175337744	94468	235
TRINITY_DN5018_c0_g1_i8	1490	2	NA	NA	NA	TRINITY_DN5018_c0_g1	2341	NA	NA	NA	jcf7180001858335	0.84	1722	1158	1107	0.953	2697	0	1185	1485	1334	1706	1194	0.87	0.924	2054	0.364	1.44	0.662	0	0.142	As548_TRINITY_DN240_c2_g1	0	NA	NA	NA	1748	3079	5884	NA	NA	NA	NA	NA	NA	NA	NA	NA	NA
TRINITY_DN5021_c0_g1_i15	3176	2	NA	NA	NA	TRINITY_DN5021_c0_g1	4842	NA	NA	NA	NA	0	0.012	1.17	0	0	1953	0	0.292	0.945	0	0	0.949	1212	0	1.18	0.042	0.063	1335	0	0.229	As548_TRINITY_DN11351_c0_g1	0	NA	NA	NA	0.549	0.677	4.04	chr6B	633605541	94.34	53	1.17e-12	82.4	chr6B	126635168	95745	47
TRINITY_DN50241_c0_g1_i2	781	2	NA	NA	NA	TRINITY_DN50241_c0_g1	905	NA	NA	NA	NA	0.068	0.446	0.116	0	0	0.889	0	0	0.904	1464	0.18	0.309	0.479	0	0.413	0.031	0.471	0	0	0.719	As548_TRINITY_DN3543_c0_g2	0	NA	NA	NA	4525	5797	6339	NA	NA	NA	NA	NA	NA	NA	NA	NA	NA
TRINITY_DN50254_c0_g1_i1	445	2	NA	NA	NA	TRINITY_DN50254_c0_g1	695	NA	NA	NA	jcf7180001932804	0	0	0.591	0	0	0	0	0	0.488	0	0	0.267	1281	0	0.595	0	0	0	0	0	As548_TRINITY_DN5051_c0_g1	1.74e-46	NA	NA	NA	11638	7301	21429	chr6S	15551335	84644	267	1.5e-68	265	chr6S	15843625	83396	265
TRINITY_DN5028_c0_g1_i22	2454	2	NA	NA	NA	TRINITY_DN5028_c0_g1	4894	NA	NA	NA	jcf7180001889024	0.352	0.988	0.243	0	1135	0.32	0	0.469	0.582	0	0.35	0.128	0.86	0.454	0.413	0.323	0.604	0	0	0.498	As548_TRINITY_DN14053_c1_g1	1.55e-79	NA	NA	NA	3816	0.651	0.376	chr6B	596915273	96115	901	0	1445	chr6B	252384008	94.69	904
TRINITY_DN5029_c0_g1_i13	2331	2	NA	NA	NA	TRINITY_DN5029_c0_g1	2998	NA	NA	NA	NA	0	0.289	0.463	0.168	0.112	0.31	0	0.088	0.353	1865	0.224	0.075	0.235	0.008	0.048	0.021	0.098	0	0	1.81	As548_TRINITY_DN3614_c0_g1	0	NA	NA	NA	10709	4134	1548	NA	NA	NA	NA	NA	NA	NA	NA	NA	NA
TRINITY_DN5032_c0_g1_i2	1716	2	NA	NA	NA	TRINITY_DN5032_c0_g1	2029	NA	NA	NA	jcf7180001552272	0.42	1867	1135	0	1298	0.971	0	2158	1828	0	1293	1077	1163	0	1372	1217	1552	1121	0	0	As548_TRINITY_DN11231_c0_g1	0	NA	NA	NA	2447	2287	2276	NA	NA	NA	NA	NA	NA	NA	NA	NA	NA
TRINITY_DN5041_c0_g1_i7	3608	2	NBSLRR	796	3189	TRINITY_DN5041_c0_g1	4306	NBSLRR	825	3410	jcf7180001932335	0	0.301	0.301	0	0.405	0.227	0	0.071	0.55	0	0	0.288	0.792	0.318	0.48	0.916	0.211	0	0.172	0.379	As548_TRINITY_DN1266_c2_g1	0	NBSLRR	225	1571	0.43	0.906	1707	chr6B	155551509	99713	1396	0	2556	chr6B	155549541	99529	850
TRINITY_DN505_c0_g1_i13	1410	2	NA	NA	NA	TRINITY_DN505_c0_g1	2024	NA	NA	NA	NA	0.61	1337	0	0	0	0	0	0.248	0	0	0.009	0.256	1193	0.893	0	0.042	0.288	0	0.269	0.775	As548_TRINITY_DN17722_c0_g1	5.77e-150	NA	NA	NA	2767	1821	5053	NA	NA	NA	NA	NA	NA	NA	NA	NA	NA
TRINITY_DN5063_c0_g1_i8	1197	2	NA	NA	NA	TRINITY_DN5063_c0_g1	2030	NA	NA	NA	jcf7180001917600	11273	11718	19969	11422	10188	23967	6.15	9596	18404	8447	15246	24.71	15904	12008	24595	12642	11484	27224	12424	5186	As548_TRINITY_DN2070_c0_g1	0	NA	NA	NA	65771	46946	75098	chr6B	444305840	96732	153	9.77e-65	254	chr6B	444305611	90845	142
TRINITY_DN5066_c0_g1_i10	1352	2	NA	NA	NA	TRINITY_DN5066_c0_g1	4493	NA	NA	NA	jcf7180001916283	0.745	1	0.336	0.662	0.264	0.847	0.039	0	0.499	1052	0.62	1077	0.44	0.159	0.566	0.323	0.428	0.367	0.301	0.743	As548_TRINITY_DN996_c0_g1	0	NA	NA	NA	194746	97121	247087	chr6B	3388165	97866	656	0	1133	chr6B	3385008	98113	265
TRINITY_DN5070_c0_g1_i18	4706	2	NA	NA	NA	TRINITY_DN5070_c0_g1	7272	NA	NA	NA	jcf7180001929298	0.285	0	0.405	0	0.03	0.599	0	0.292	0.145	0.325	0	0.981	0	0.295	1152	1009	0.295	1233	0	0	As548_TRINITY_DN34984_c0_g1	4.65e-126	NA	NA	NA	0	0.572	0.444	chr6B	239326107	96.97	99	1.7e-37	165	chr6B	22468629	97778	45
TRINITY_DN5073_c0_g1_i7	4556	2	NA	NA	NA	TRINITY_DN5073_c0_g1	4991	NA	NA	NA	NA	0.732	0.867	0.429	0.084	0.476	0.579	0.01	1176	0.737	1128	0.709	0.8	1349	1257	0.413	0.874	1784	0.418	0.14	0	As548_TRINITY_DN7929_c0_g2	0	NA	NA	NA	2907	2542	1946	NA	NA	NA	NA	NA	NA	NA	NA	NA	NA
TRINITY_DN50775_c0_g1_i4	356	2	NA	NA	NA	TRINITY_DN50775_c0_g1	801	NA	NA	NA	jcf7180001604280	0	0.12	0	0	0.487	0	2752	0	0	5801	0	0	1232	1.34	0	0	0.464	0	0	3802	As548_TRINITY_DN12941_c0_g1	1.91e-81	NA	NA	NA	6743	46.92	22738	chr6B	394403907	81773	203	5.05e-39	167	chr6B	151230157	81281	203
TRINITY_DN50775_c0_g1_i7	355	2	NA	NA	NA	TRINITY_DN50775_c0_g1	801	NA	NA	NA	jcf7180001604280	0	2216	0	0	0	0	0	1707	0.384	0	0	0	1241	0	0.173	0	0	0	0	0	As548_TRINITY_DN12941_c0_g1	1.91e-81	NA	NA	NA	6743	46.92	22738	chr6B	394403907	81773	203	5.05e-39	167	chr6B	151230157	81281	203
TRINITY_DN5079_c0_g1_i1	2164	2	NA	NA	NA	TRINITY_DN5079_c0_g1	2471	NA	NA	NA	jcf7180001846843	1789	2565	6707	1529	2585	6211	0	2662	6574	2039	2272	5727	3187	3846	6641	3975	3097	3861	2.15	1.85	As548_TRINITY_DN430_c0_g2	0	NA	NA	NA	9.38	9711	14999	NA	NA	NA	NA	NA	NA	NA	NA	NA	NA
TRINITY_DN5099_c0_g1_i24	4427	2	NA	NA	NA	TRINITY_DN5099_c0_g1	5251	NA	NA	NA	NA	0	0.157	0.579	0	0.142	0.093	0	0.283	0.415	0	0	0.235	0.205	0	0.288	0.354	0.302	0	0	0	As548_TRINITY_DN5646_c0_g1	0	NA	NA	NA	4825	8805	3403	NA	NA	NA	NA	NA	NA	NA	NA	NA	NA
TRINITY_DN50_c0_g1_i11	2023	2	NA	NA	NA	TRINITY_DN50_c0_g1	5624	NA	NA	NA	NA	0	0.277	0	0	0	0	0	0	0	1.67	0	0	0	0	0	0	0	0.173	0	0.206	As548_TRINITY_DN530_c0_g2	1.33e-105	NA	NA	NA	8601	13933	3562	NA	NA	NA	NA	NA	NA	NA	NA	NA	NA
TRINITY_DN5101_c0_g1_i9	1512	2	NA	NA	NA	TRINITY_DN5101_c0_g1	7902	NA	NA	NA	jcf7180001924312	0.813	0.422	2467	0.566	1287	2046	1077	1079	1475	0.618	1544	2144	1.73	1529	3378	1269	0.927	0	0.236	0.806	As548_TRINITY_DN963_c0_g1	0	NA	NA	NA	16373	18587	19506	chr6B	415879652	99781	456	0	837	chr6B	325035563	98568	419
TRINITY_DN5103_c0_g1_i10	2508	2	NA	NA	NA	TRINITY_DN5103_c0_g1	3055	NA	NA	NA	NA	0.393	0.265	0.695	0	1135	0.785	0	1335	1018	1.03	0.691	0.757	0.538	0.545	0.739	0.572	1342	0.397	0	0	As548_TRINITY_DN3301_c0_g1	0	NA	NA	NA	4535	7899	4598	NA	NA	NA	NA	NA	NA	NA	NA	NA	NA
TRINITY_DN5103_c0_g1_i9	2508	2	NA	NA	NA	TRINITY_DN5103_c0_g1	3055	NA	NA	NA	NA	0.677	1397	0.313	0	0.811	0.134	0	1574	0.249	0.575	1311	0.021	0.762	1401	0.058	0.146	0.323	0	0.699	0.909	As548_TRINITY_DN3301_c0_g1	0	NA	NA	NA	4535	7899	4598	NA	NA	NA	NA	NA	NA	NA	NA	NA	NA
TRINITY_DN5122_c0_g1_i4	2701	2	NA	NA	NA	TRINITY_DN5122_c0_g1	3809	NA	NA	NA	jcf7180001542850	0.108	0.145	0.568	0	0.547	2883	0	2627	1423	0	0.826	0.747	0.293	0.803	1132	0.094	0	2007	0.548	0.435	As548_TRINITY_DN6203_c0_g4	0	NA	NA	NA	8341	4917	11562	chr6B	423831118	91946	149	4.05e-51	209	chr6B	448910523	91275	149
TRINITY_DN51379_c0_g1_i4	1289	2	NA	NA	NA	TRINITY_DN51379_c0_g1	1598	NA	NA	NA	NA	0.962	1096	0.718	0	0.385	0.93	0.186	1875	0.55	0	1149	1418	1241	0.386	0.988	0.895	3245	0.723	0.408	0.379	As548_TRINITY_DN3083_c0_g1	0	NA	NA	NA	8871	7398	6009	NA	NA	NA	NA	NA	NA	NA	NA	NA	NA
TRINITY_DN5142_c0_g1_i5	1139	2	NA	NA	NA	TRINITY_DN5142_c0_g1	4006	NA	NA	NA	NA	0	1542	0	1167	0	0	0	0	0.073	0	0	0.224	0	0	0.451	0.978	0.428	0.53	0.258	0.372	As548_TRINITY_DN228_c0_g1	0	NA	NA	NA	0.33	3738	0.706	chr6B	164364597	75581	602	3.2e-72	279	chr6B	408212379	79424	243
TRINITY_DN5143_c0_g2_i2	2459	2	NA	NA	NA	TRINITY_DN5143_c0_g2	2962	NA	NA	NA	NA	0.054	0.325	0.718	0	0.669	1581	0	0	0.82	0	0.171	1429	0.792	0	1651	0.146	0.766	0.744	0.43	0.466	As548_TRINITY_DN3081_c0_g1	0	NA	NA	NA	0.479	1029	2686	chr6S	240281442	87879	66	9.25e-12	78.7	NA	NA	NA	NA
TRINITY_DN5149_c0_g1_i12	2756	2	NA	NA	NA	TRINITY_DN5149_c0_g1	3316	NA	NA	NA	NA	1.49	1	4981	4273	1014	5932	4054	0.548	7229	2863	0.79	5887	1662	0.954	5307	1831	0.639	4707	2096	0.949	As548_TRINITY_DN1701_c0_g1	0	NA	NA	NA	12237	9342	31921	NA	NA	NA	NA	NA	NA	NA	NA	NA	NA
TRINITY_DN51780_c0_g1_i2	764	2	NA	NA	NA	TRINITY_DN51780_c0_g1	1507	NA	NA	NA	NA	0.474	1457	0.683	0	0	0.031	0	0.973	0.509	0.51	0.467	0	1808	0.409	0.096	1467	0.169	0	0	0	As548_TRINITY_DN12339_c0_g3	1.94e-168	NA	NA	NA	1259	0.299	0.455	NA	NA	NA	NA	NA	NA	NA	NA	NA	NA
TRINITY_DN5189_c0_g1_i10	2342	2	NA	NA	NA	TRINITY_DN5189_c0_g1	2794	NA	NA	NA	NA	1328	1349	1077	0	4754	1.85	0	2423	2659	0.108	1517	1525	2248	4134	1276	2216	2.95	0.571	0	2648	As548_TRINITY_DN98_c0_g1	0	NA	NA	NA	4266	7169	3972	NA	NA	NA	NA	NA	NA	NA	NA	NA	NA
TRINITY_DN52000_c0_g1_i3	2478	2	NA	NA	NA	TRINITY_DN52000_c0_g1	2972	NA	NA	NA	jcf7180001892450	0.027	0.325	0.66	0	0.243	1581	0	0.15	0.904	0.401	0.449	1365	0.254	0.394	0.739	0.208	0.14	0.377	0	0.213	As548_TRINITY_DN385_c2_g1	1.39e-162	NA	NA	NA	25873	14426	29.27	chr6B	197657207	83333	606	1.64e-153	549	chr6B	197534316	82187	567
TRINITY_DN5204_c0_g1_i9	843	2	NA	NA	NA	TRINITY_DN5204_c0_g1	2506	NA	NA	NA	NA	4146	34443	22228	7245	24582	23.16	2154	20473	18788	16243	26.9	28965	14653	20216	26.37	17616	71003	11146	2719	18142	As548_TRINITY_DN847_c0_g1	0	NA	NA	NA	115409	164915	64423	NA	NA	NA	NA	NA	NA	NA	NA	NA	NA
TRINITY_DN5206_c0_g1_i15	935	2	NA	NA	NA	TRINITY_DN5206_c0_g1	2560	NA	NA	NA	jcf7180001703568	0	0.807	0	0	0.182	0.3	0	0.716	0	0.347	0	0.373	0.401	0.356	0.509	0.427	1004	0	0.473	0	As548_TRINITY_DN642_c0_g1	2.52e-179	NA	NA	NA	18.99	17663	9195	NA	NA	NA	NA	NA	NA	NA	NA	NA	NA
TRINITY_DN52369_c0_g1_i1	767	2	NA	NA	NA	TRINITY_DN52369_c0_g1	891	NA	NA	NA	NA	0	0.65	0.301	0	0.416	0.548	0	0.106	0	0	0	0.192	0.254	0.22	0.422	1093	0.084	0.479	0	0	As548_TRINITY_DN17084_c0_g1	0	NA	NA	NA	0.36	0	0.728	NA	NA	NA	NA	NA	NA	NA	NA	NA	NA
TRINITY_DN52412_c0_g1_i3	692	2	NA	NA	NA	TRINITY_DN52412_c0_g1	1377	NA	NA	NA	NA	0	0	0.313	1167	0.243	1044	0	0	1101	0	0	2229	0.577	0	1.66	0.302	0.147	0	1967	0	As548_TRINITY_DN64769_c0_g1	2.4e-132	NA	NA	NA	2138	0.317	2561	NA	NA	NA	NA	NA	NA	NA	NA	NA	NA
TRINITY_DN5278_c0_g1_i15	1471	2	NA	NA	NA	TRINITY_DN5278_c0_g1	3806	NA	NA	NA	NA	0	1361	2815	0.06	0	2563	7521	1.53	2648	0	0	5204	2.62	0.098	7284	3538	0.597	2272	2762	0	As548_TRINITY_DN3547_c0_g1	0	NA	NA	NA	75811	50254	42186	NA	NA	NA	NA	NA	NA	NA	NA	NA	NA
TRINITY_DN527_c0_g1_i13	2870	2	NBSLRR	520	2820	TRINITY_DN527_c0_g1	9116	NBSLRR	4134	8519	jcf7180001522011	0.705	3565	5004	0.481	4.47	2863	0	5.2	3604	1301	4543	2282	1.73	4891	5048	2591	5261	1.07	1472	3929	As548_TRINITY_DN2515_c0_g2	2.27e-70	NBSLRR	3745	6299	1848	35529	3926	chr6B	149467979	96.97	693	0	1158	chr6B	149457226	91898	432
TRINITY_DN527_c0_g1_i13	2870	2	NBSLRR	520	2820	TRINITY_DN527_c0_g1	9116	NBSLRR	4134	8519	jcf7180001522011	0.705	3565	5004	0.481	4.47	2863	0	5.2	3604	1301	4543	2282	1.73	4891	5048	2591	5261	1.07	1472	3929	As548_TRINITY_DN2515_c0_g2	2.27e-70	NBSLRR	3745	6299	1848	35529	3926	chr6B	149467979	96.97	693	0	1158	chr6B	149457226	91898	432
TRINITY_DN5280_c0_g1_i1	1013	2	NA	NA	NA	TRINITY_DN5280_c0_g1	3819	NA	NA	NA	NA	0	0	0.069	0	0.324	0.372	0	1114	0.042	0	0	0.171	0	0	0.144	0.177	0.183	0	0.021	0	As548_TRINITY_DN6890_c0_g1	0	NA	NA	NA	4725	7.53	3835	NA	NA	NA	NA	NA	NA	NA	NA	NA	NA
TRINITY_DN5280_c0_g1_i2	2229	2	NA	NA	NA	TRINITY_DN5280_c0_g1	3819	NA	NA	NA	NA	0.149	0.132	0.741	0	1967	0	0	0	0.104	1475	0.368	0.405	0	1022	0.557	1061	0	0	0.043	0.119	As548_TRINITY_DN6890_c0_g1	0	NA	NA	NA	4725	7.53	3835	NA	NA	NA	NA	NA	NA	NA	NA	NA	NA
TRINITY_DN5280_c0_g1_i7	2223	2	NA	NA	NA	TRINITY_DN5280_c0_g1	3819	NA	NA	NA	NA	0	0	0.405	0	0.811	0	0	0	0	0	0	0.011	0.117	0.606	0	1301	1988	0	0.032	1557	As548_TRINITY_DN6890_c0_g1	0	NA	NA	NA	4725	7.53	3835	NA	NA	NA	NA	NA	NA	NA	NA	NA	NA
TRINITY_DN5315_c0_g1_i2	2005	2	NA	NA	NA	TRINITY_DN5315_c0_g1	2816	NA	NA	NA	NA	0.176	0.205	0	0	1115	0.289	0.098	0	0.249	1171	0	0.117	0.997	0.84	0	0	0	1243	0.946	0.348	As548_TRINITY_DN5260_c0_g1	0	NA	NA	NA	14964	10195	12746	NA	NA	NA	NA	NA	NA	NA	NA	NA	NA
TRINITY_DN5343_c0_g1_i10	2842	2	NA	NA	NA	TRINITY_DN5343_c0_g1	3471	NA	NA	NA	NA	0.434	1939	1436	0	0.669	0.475	1185	0	0	0	0.359	0.309	1711	0	0.441	0.385	0.281	0.509	0	0	As548_TRINITY_DN47086_c0_g1	0	NA	NA	NA	1259	1882	2117	NA	NA	NA	NA	NA	NA	NA	NA	NA	NA
TRINITY_DN538_c0_g1_i8	3106	2	NA	NA	NA	TRINITY_DN538_c0_g1	3644	NA	NA	NA	NA	0	0.337	0.197	0	0.547	0.599	0	0.177	0	0	0.081	0.395	0.215	0.371	0	0.073	0.035	0	0	1636	As548_TRINITY_DN28950_c0_g1	0	NA	NA	NA	2787	14866	14316	NA	NA	NA	NA	NA	NA	NA	NA	NA	NA
TRINITY_DN538_c0_g1_i9	3118	2	NA	NA	NA	TRINITY_DN538_c0_g1	3644	NA	NA	NA	NA	0	0.554	0.29	0	0.568	0.444	0	0.672	0	0.477	0.171	0.405	0.156	0.424	1603	0.083	0.049	0.408	0	1099	As548_TRINITY_DN28950_c0_g1	0	NA	NA	NA	2787	14866	14316	NA	NA	NA	NA	NA	NA	NA	NA	NA	NA
TRINITY_DN53945_c0_g2_i1	217	2	NA	NA	NA	TRINITY_DN53945_c0_g2	217	NA	NA	NA	NA	0	0	23.49	0	0	0	0	0	0	0	0	0	0	0	0	0	0	0	0	0	As548_TRINITY_DN26707_c0_g1	4.92e-62	NA	NA	NA	0	1865	0	NA	NA	NA	NA	NA	NA	NA	NA	NA	NA
TRINITY_DN539_c0_g1_i2	3237	2	NA	NA	NA	TRINITY_DN539_c0_g1	3978	NA	NA	NA	jcf7180001758329	0.596	1373	0.429	0	0.943	0.723	1087	0.867	0.55	0.998	1059	0.715	1261	2627	0.825	1592	2606	0.937	1634	0	As548_TRINITY_DN4356_c0_g1	0	NA	NA	NA	10959	13239	4347	NA	NA	NA	NA	NA	NA	NA	NA	NA	NA
TRINITY_DN5413_c0_g1_i14	1775	2	NA	NA	NA	TRINITY_DN5413_c0_g1	2112	NA	NA	NA	NA	0	0.626	0	0	0	0.568	0.02	0	0	0	5531	0	0.029	0	0	0	0	0.785	0.86	0	As548_TRINITY_DN2761_c0_g2	0	NA	NA	NA	1928	1346	2208	NA	NA	NA	NA	NA	NA	NA	NA	NA	NA
TRINITY_DN5427_c1_g1_i4	1426	2	NA	NA	NA	TRINITY_DN5427_c1_g1	2000	NA	NA	NA	NA	3238	2.12	5062	4706	17081	11534	4328	6023	13283	8219	5935	11945	6921	4611	6996	7731	5134	6816	8157	26846	As548_TRINITY_DN202_c0_g2	0	NA	NA	NA	8511	6527	15.75	NA	NA	NA	NA	NA	NA	NA	NA	NA	NA
TRINITY_DN5430_c0_g1_i7	487	2	NA	NA	NA	TRINITY_DN5430_c0_g1	4150	NA	NA	NA	NA	0	1024	1089	0	0.537	1654	0	1017	0.955	0	2846	1589	0.714	2461	0.557	1446	1.11	1304	0	0	As548_TRINITY_DN489_c0_g1	0	NA	NA	NA	3087	3967	3755	NA	NA	NA	NA	NA	NA	NA	NA	NA	NA
TRINITY_DN5433_c0_g1_i4	2692	2	NA	NA	NA	TRINITY_DN5433_c0_g1	3727	NA	NA	NA	NA	10582	11525	7239	3743	7755	9735	10468	11373	11092	6517	10011	10825	15034	12765	10162	7.46	11364	3648	7.48	8.19	As548_TRINITY_DN1102_c0_g1	0	NA	NA	NA	28.65	24595	12.7	NA	NA	NA	NA	NA	NA	NA	NA	NA	NA
TRINITY_DN5448_c0_g1_i14	1440	2	NA	NA	NA	TRINITY_DN5448_c0_g1	3784	NA	NA	NA	jcf7180001900557	0	0.193	0	0.361	0	0.155	2321	0	0	0	0	0.064	0	0.492	0	0	0	0	0	0	As548_TRINITY_DN92032_c0_g1	0	NA	NA	NA	10769	8189	6976	chr6S	755857234	98142	1130	0	1971	chr6S	755858364	97.79	1131
TRINITY_DN5450_c0_g1_i27	4753	2	NA	NA	NA	TRINITY_DN5450_c0_g1	6433	NA	NA	NA	jcf7180001712942	2629	4444	1135	0.915	3.7	3907	0.627	0.681	0	2.06	2281	3061	4565	5997	1315	1509	4.27	4738	0.72	2664	As548_TRINITY_DN4889_c0_g1	0	NA	NA	NA	6563	21.34	4552	chr6B	366782574	77947	721	2.3e-100	374	chr6B	366782901	100	172
TRINITY_DN5458_c0_g1_i21	603	2	NA	NA	NA	TRINITY_DN5458_c0_g1	5948	NA	NA	NA	NA	0	1469	5.12	1372	0.091	4981	0	1052	3251	0.054	2352	2165	2082	1529	5796	0.239	1461	2017	0	2134	As548_TRINITY_DN1017_c1_g2	0	NA	NA	NA	4206	41062	6453	chr6S	146228586	79333	150	3.1e-14	87.9	NA	NA	NA	NA
TRINITY_DN547_c0_g1_i14	3782	2	NA	NA	NA	TRINITY_DN547_c0_g1	4701	NA	NA	NA	NA	0	0	0.058	0	0.497	0	0	0.442	0.187	0.748	0	0.245	0.117	0.03	0.547	0.021	0	0.571	0.032	0	As548_TRINITY_DN6862_c0_g1	0	NA	NA	NA	4765	4196	5849	NA	NA	NA	NA	NA	NA	NA	NA	NA	NA
TRINITY_DN54_c1_g1_i5	1212	2	NA	NA	NA	TRINITY_DN54_c1_g1	2685	NA	NA	NA	NA	0.989	1397	0.695	0	3072	1561	0	1052	1412	0.802	3017	1429	0.694	2552	1785	0.936	2121	0.774	1247	1897	As548_TRINITY_DN344_c0_g1	0	NA	NA	NA	6943	12852	9582	NA	NA	NA	NA	NA	NA	NA	NA	NA	NA
TRINITY_DN5506_c0_g1_i5	326	2	NA	NA	NA	TRINITY_DN5506_c0_g1	1831	NA	NA	NA	NA	2032	0	2815	0	1612	1.84	0	0	3729	0	0	0.469	0	0	6.65	3673	5338	0	0	0	As548_TRINITY_DN3742_c0_g1	3.89e-176	NA	NA	NA	6473	2762	3824	NA	NA	NA	NA	NA	NA	NA	NA	NA	NA
TRINITY_DN55078_c0_g1_i3	733	2	NA	NA	NA	TRINITY_DN55078_c0_g1	863	NA	NA	NA	NA	0.989	2.3	1969	0.746	4734	1705	1.42	3608	3147	1442	3466	0.725	3177	2506	1871	2664	3982	1049	0.269	3099	As548_TRINITY_DN24926_c0_g1	6.08e-42	NBSLRR	759	6410	6453	11506	2413	NA	NA	NA	NA	NA	NA	NA	NA	NA	NA
TRINITY_DN5510_c0_g1_i9	1096	2	NA	NA	NA	TRINITY_DN5510_c0_g1	1981	NA	NA	NA	NA	1639	0.975	6347	4489	0	5136	0	1486	5297	0	0.395	6036	1222	0.772	6295	2352	1208	2486	3085	0	As548_TRINITY_DN2976_c0_g2	1.25e-131	NA	NA	NA	24105	20144	59985	NA	NA	NA	NA	NA	NA	NA	NA	NA	NA
TRINITY_DN5519_c0_g2_i1	3751	2	NA	NA	NA	TRINITY_DN5519_c0_g2	5807	NA	NA	NA	jcf7180001649339	1084	2481	0.151	1107	0.182	0.413	0.098	3122	0	1052	0.871	0.949	3196	5073	0.019	0.76	2634	0	0.419	3225	As548_TRINITY_DN6224_c1_g1	0	NA	NA	NA	13126	25307	12973	chr6S	154759838	93333	240	7.52e-95	355	chr6S	53322591	83206	131
TRINITY_DN5528_c0_g1_i12	1116	2	NA	NA	NA	TRINITY_DN5528_c0_g1	2692	NA	NA	NA	NA	0.122	0.843	0.382	0	0	0.041	0	1088	0.197	0	0	0.32	0	0	0.106	0	0.379	0.672	0	1241	As548_TRINITY_DN168_c0_g4	0	NA	NA	NA	3696	4521	4313	NA	NA	NA	NA	NA	NA	NA	NA	NA	NA
TRINITY_DN553_c0_g1_i1	2885	2	NA	NA	NA	TRINITY_DN553_c0_g1	4297	NA	NA	NA	NA	0	0.482	7981	0.445	0.679	9322	0	0.548	7104	0.466	0.602	8788	5103	0.666	14.96	1696	0.246	3923	0.785	0.838	As548_TRINITY_DN10998_c0_g2	3.33e-170	NA	NA	NA	2697	0.677	4336	NA	NA	NA	NA	NA	NA	NA	NA	NA	NA
TRINITY_DN553_c0_g1_i11	2546	2	NA	NA	NA	TRINITY_DN553_c0_g1	4297	NA	NA	NA	NA	2967	0.723	6938	2732	0.385	7679	0	0.769	6917	2613	0.332	8276	4555	0.492	7351	3496	0.197	3912	1257	0.775	As548_TRINITY_DN10998_c0_g2	3.33e-170	NA	NA	NA	2697	0.677	4336	NA	NA	NA	NA	NA	NA	NA	NA	NA	NA
TRINITY_DN553_c0_g1_i8	2839	2	NA	NA	NA	TRINITY_DN553_c0_g1	4297	NA	NA	NA	NA	0.528	0.626	6116	0.253	0.811	5695	0.666	0.203	6242	0.737	0.449	6825	2473	0.288	6113	1706	0.281	3586	0.58	0	As548_TRINITY_DN10998_c0_g2	3.33e-170	NA	NA	NA	2697	0.677	4336	NA	NA	NA	NA	NA	NA	NA	NA	NA	NA
TRINITY_DN55481_c0_g1_i1	653	2	NA	NA	NA	TRINITY_DN55481_c0_g1	1053	NA	NA	NA	jcf7180001906941	0.108	0	0.382	0	0	0.475	1567	0	0.177	0	0	0.97	0.811	0	0.643	0	0.204	0	0	0	As548_TRINITY_DN7574_c0_g1	0	NA	NA	NA	0	10204	1809	NA	NA	NA	NA	NA	NA	NA	NA	NA	NA
TRINITY_DN5560_c0_g1_i19	2695	2	NA	NA	NA	TRINITY_DN5560_c0_g1	3647	NA	NA	NA	NA	0.434	2071	0	0	0.304	0.331	0.666	3821	0.218	0.575	2658	0.075	1945	2756	0	1478	3891	0	0.871	2308	As548_TRINITY_DN5110_c0_g1	0	NA	NA	NA	43934	29723	18231	NA	NA	NA	NA	NA	NA	NA	NA	NA	NA
TRINITY_DN557_c0_g1_i36	1768	2	NA	NA	NA	TRINITY_DN557_c0_g1	6725	NA	NA	NA	NA	0	0	0.185	0	0	0.031	0	0	0	0	0	0	0	0	0	0	0	1488	0	0	As548_TRINITY_DN1112_c0_g1	0	NA	NA	NA	13885	12825	9081	chr6S	585144258	88158	152	1.56e-42	182	chr6S	737328821	82993	147
TRINITY_DN55899_c0_g1_i1	358	2	NA	NA	NA	TRINITY_DN55899_c0_g1	358	NA	NA	NA	NA	0	1578	0	0	0	0	0	0	0	0	0	0	0	0	0	1498	0	0	0	0	As548_TRINITY_DN98444_c0_g1	8.41e-67	NA	NA	NA	0	0	5.61	NA	NA	NA	NA	NA	NA	NA	NA	NA	NA
TRINITY_DN5608_c0_g1_i8	1143	2	NA	NA	NA	TRINITY_DN5608_c0_g1	3392	NA	NA	NA	NA	0	1469	1054	0	1328	0.413	0	1583	0.343	0.336	1.85	0.213	0.049	0.507	0.297	0	2149	0.672	0.172	1834	As548_TRINITY_DN4647_c3_g1	0	NA	NA	NA	0	3668	0.387	NA	NA	NA	NA	NA	NA	NA	NA	NA	NA
TRINITY_DN5609_c0_g1_i21	2728	2	NA	NA	NA	TRINITY_DN5609_c0_g1	3799	NA	NA	NA	jcf7180001933666	0.434	0.59	0.382	0	0.355	0.651	0	0.31	0.789	0.466	0.09	0.832	0.85	0.22	0.509	0.208	0.576	0.448	0	0	As548_TRINITY_DN8840_c0_g1	1.05e-174	NA	NA	NA	2487	1355	0.421	chr6B	423092445	96998	1166	0	1936	chr6B	423095196	99123	456
TRINITY_DN5615_c0_g1_i16	2873	2	NA	NA	NA	TRINITY_DN5615_c0_g1	5537	NA	NA	NA	NA	0.366	0.879	0.799	0	1348	0.94	0.519	0.265	0.893	0.38	0	0.715	0.694	0.31	0.806	0	0.927	0	0.623	0	As548_TRINITY_DN4807_c1_g1	0	NA	NA	NA	1179	1794	2765	chr6B	674935107	97917	48	3.73e-13	84.2	NA	NA	NA	NA
TRINITY_DN5615_c0_g1_i20	4786	2	NA	NA	NA	TRINITY_DN5615_c0_g1	5537	NA	NA	NA	NA	0.149	0.482	0.753	0	0	0.785	0	0	1298	0.347	0	0.747	0.166	0.242	0.48	0.843	0	0	0	0.34	As548_TRINITY_DN4807_c1_g1	0	NA	NA	NA	1179	1794	2765	chr6B	674935107	97917	48	3.73e-13	84.2	NA	NA	NA	NA
TRINITY_DN5630_c0_g1_i8	1211	2	NA	NA	NA	TRINITY_DN5630_c0_g1	1938	NA	NA	NA	NA	0	0.169	0.429	0	0.578	0.331	0	0	0.332	0.998	0.44	0.075	0.479	0.235	0.326	0.687	0.274	0.611	0.011	0	As548_TRINITY_DN4668_c0_g1	9.92e-98	NA	NA	NA	5564	8497	5838	NA	NA	NA	NA	NA	NA	NA	NA	NA	NA
TRINITY_DN5634_c0_g1_i12	2424	2	NA	NA	NA	TRINITY_DN5634_c0_g1	3237	NA	NA	NA	jcf7180001921715	0.705	1505	0	0	1358	0.568	0	0	0	0	0	0	0	2377	0.182	0	1601	0	0	0	As548_TRINITY_DN38539_c0_g1	1.12e-14	NA	NA	NA	0.929	0.334	0.546	chr6S	592293876	86498	474	5.07e-139	501	chr6S	592295475	86498	474
TRINITY_DN5653_c0_g1_i32	3623	2	NA	NA	NA	TRINITY_DN5653_c0_g1	5044	NA	NA	NA	NA	0	2866	0.151	0.205	0	0.496	1528	2839	0	4283	2.11	0.181	0.635	0	0.873	0	0.59	1467	1386	3399	As548_TRINITY_DN3203_c0_g2	0	NA	NA	NA	9.24	22457	9559	NA	NA	NA	NA	NA	NA	NA	NA	NA	NA
TRINITY_DN5659_c0_g1_i1	1193	2	NA	NA	NA	TRINITY_DN5659_c0_g1	1608	NA	NA	NA	jcf7180001522634	0	0	2467	0.144	1.45	0.031	1244	0.991	3.51	0	0.233	2069	0	0	3234	0.572	0	1875	0.613	1842	As548_TRINITY_DN2166_c0_g1	7.38e-173	NA	NA	NA	5884	10.23	6441	NA	NA	NA	NA	NA	NA	NA	NA	NA	NA
TRINITY_DN56774_c0_g1_i2	806	2	NA	NA	NA	TRINITY_DN56774_c0_g1	1121	NA	NA	NA	NA	0	0.361	0.278	1131	0.466	0.227	0	0.38	0.322	0	0.404	0.181	0	0	0.624	0.395	0.59	0	0.656	0	As548_TRINITY_DN16089_c0_g1	4.31e-114	NA	NA	NA	0.17	0.695	1434	NA	NA	NA	NA	NA	NA	NA	NA	NA	NA
TRINITY_DN56848_c0_g1_i1	301	2	NA	NA	NA	TRINITY_DN56848_c0_g1	331	NA	NA	NA	NA	0	5335	0	0	0	0	0	0	0	0	0	0	0	0	0	0	1004	0	0	0	As548_TRINITY_DN4215_c0_g1	1.03e-45	NA	NA	NA	105809	115162	58949	NA	NA	NA	NA	NA	NA	NA	NA	NA	NA
TRINITY_DN5698_c0_g1_i1	4986	2	NA	NA	NA	TRINITY_DN5698_c0_g1	8013	NBSLRR	740	4367	NA	0	0.012	0.139	0	0	0.072	0	0.035	0.073	0	0.09	0.053	0	0.167	0.01	0.01	0.056	0	0	0.174	As548_TRINITY_DN5389_c0_g1	0	NBSLRR	719	4045	1239	0.748	2.64	NA	NA	NA	NA	NA	NA	NA	NA	NA	NA
TRINITY_DN5720_c0_g2_i5	1159	2	NA	NA	NA	TRINITY_DN5720_c0_g2	2085	NA	NA	NA	NA	0.705	1987	2479	0	0	1199	0.49	1884	2046	0	1.14	0.853	0.538	1537	1958	0.187	2.03	0.102	0	0.806	As548_TRINITY_DN54216_c0_g1	1.71e-125	NA	NA	NA	0	0	7511	NA	NA	NA	NA	NA	NA	NA	NA	NA	NA
TRINITY_DN5721_c0_g1_i7	1536	2	NA	NA	NA	TRINITY_DN5721_c0_g1	2368	NA	NA	NA	NA	0.068	0.951	0.463	0	3234	1519	0	0	1755	0	5109	1866	1838	0.106	1775	0.364	2725	0	0	1067	As548_TRINITY_DN3400_c0_g3	0	NA	NA	NA	3247	12377	7135	NA	NA	NA	NA	NA	NA	NA	NA	NA	NA
TRINITY_DN5729_c0_g1_i17	3339	2	NA	NA	NA	TRINITY_DN5729_c0_g1	3835	NA	NA	NA	jcf7180001711345	0.569	0.638	0.023	0	0	0	0	0	0.093	0	0	0.213	0.068	0.204	0	0.042	0.541	0	0	0	As548_TRINITY_DN4293_c0_g1	0	NA	NA	NA	7522	6.43	4791	NA	NA	NA	NA	NA	NA	NA	NA	NA	NA
TRINITY_DN572_c0_g1_i10	609	2	NA	NA	NA	TRINITY_DN572_c0_g1	5872	NA	NA	NA	NA	0	0.337	0.139	0	0.335	0.548	0	0.557	0.748	0	0.35	0.395	0.098	0.288	0.192	0.666	0	1844	0.204	0	As548_TRINITY_DN4565_c0_g1	0	NA	NA	NA	11947	20197	13759	NA	NA	NA	NA	NA	NA	NA	NA	NA	NA
TRINITY_DN5730_c0_g1_i3	1414	2	NA	NA	NA	TRINITY_DN5730_c0_g1	2312	NA	NA	NA	jcf7180001934937	0.474	0.723	1.17	1348	0.852	4496	0.999	0.398	2493	2743	0.844	1856	1828	0.757	3071	1405	1004	3505	1795	0.83	As548_TRINITY_DN32410_c0_g1	5.03e-161	NA	NA	NA	1728	0.545	3107	chr6B	711625194	93233	266	8.14e-106	390	chr6B	711515249	91698	265
TRINITY_DN57335_c0_g1_i2	2129	2	NA	NA	NA	TRINITY_DN57335_c0_g1	2523	NA	NA	NA	jcf7180001635274	0.203	1529	0.556	0	0.862	0.672	0.01	0.61	0.623	0.011	1437	0.373	1339	1204	0.892	0.749	1391	0.02	0	0.016	As548_TRINITY_DN11444_c0_g1	0	NA	NA	NA	1838	1487	1036	NA	NA	NA	NA	NA	NA	NA	NA	NA	NA
TRINITY_DN57419_c0_g1_i1	351	2	NA	NA	NA	TRINITY_DN57419_c0_g1	480	NA	NA	NA	NA	0	0	1.9	0	0	0.868	0	0	2378	0	0.727	1056	1623	0.878	0.173	0.354	0	0	0	0	As548_TRINITY_DN30720_c0_g1	1.5e-60	NA	NA	NA	2887	0.449	0	NA	NA	NA	NA	NA	NA	NA	NA	NA	NA
TRINITY_DN5745_c0_g1_i25	2035	2	NA	NA	NA	TRINITY_DN5745_c0_g1	2494	NA	NA	NA	NA	0.542	2517	0.892	1.42	0	1654	1655	2803	1631	1789	0.898	1088	1789	1719	3829	0.26	0.527	2659	0	0.435	As548_TRINITY_DN13960_c1_g1	0	NA	NA	NA	23036	20399	42084	NA	NA	NA	NA	NA	NA	NA	NA	NA	NA
TRINITY_DN575_c0_g1_i21	5240	2	NA	NA	NA	TRINITY_DN575_c0_g1	6465	NA	NA	NA	jcf7180001540625	0.014	0.53	1934	0.072	0	0.01	0	0	0.218	0.108	0	0.619	0.02	0.545	0.844	0.156	0.534	0.214	0	0.332	As548_TRINITY_DN1647_c0_g1	0	NA	NA	NA	1718	2.05	7.67	NA	NA	NA	NA	NA	NA	NA	NA	NA	NA
TRINITY_DN57966_c0_g1_i1	683	2	NA	NA	NA	TRINITY_DN57966_c0_g1	1071	NA	NA	NA	NA	0.61	0.313	1019	0	0	1044	0.705	0	0.467	0	0	1162	0.587	0.151	1603	0.114	0	0	0.881	0	As548_TRINITY_DN2634_c0_g2	2.51e-101	NA	NA	NA	3287	1161	7022	NA	NA	NA	NA	NA	NA	NA	NA	NA	NA
TRINITY_DN5802_c0_g1_i2	3078	2	NA	NA	NA	TRINITY_DN5802_c0_g1	3920	NA	NA	NA	jcf7180001932754	0	0.265	0.498	0	0.162	0.785	0	1928	0.696	0	0.045	0.597	0.665	1673	0.422	0.198	1229	0.52	0.097	0	As548_TRINITY_DN817_c1_g2	0	NA	NA	NA	4915	11963	1878	chr6S	695725546	81707	656	4.68e-150	538	chr6S	695723131	84167	240
TRINITY_DN5803_c1_g1_i15	1077	2	NA	NA	NA	TRINITY_DN5803_c1_g1	1895	NA	NA	NA	jcf7180001531661	4458	0	8293	2527	0.182	10.48	1244	0	4227	4402	0	13694	4594	0.273	17024	1082	0.218	4157	8.91	0.451	As548_TRINITY_DN32054_c0_g1	7.55e-94	NA	NA	NA	2038	2507	2231	NA	NA	NA	NA	NA	NA	NA	NA	NA	NA
TRINITY_DN58054_c0_g2_i4	899	2	NA	NA	NA	TRINITY_DN58054_c0_g2	1161	NA	NA	NA	NA	0	0.096	0.463	1625	1176	0.599	0.823	0	0.53	0	0	0.672	0.577	1401	1.67	0.541	0.246	0	0	0.087	As548_TRINITY_DN5912_c0_g1	1.94e-162	NA	NA	NA	8092	11444	21065	NA	NA	NA	NA	NA	NA	NA	NA	NA	NA
TRINITY_DN580_c0_g1_i11	4791	2	NA	NA	NA	TRINITY_DN580_c0_g1	6555	NA	NA	NA	jcf7180001865058	0.135	9562	0.892	0.06	2524	1127	0.029	0.009	0.623	1.41	0	2282	8612	0.598	1651	0.437	2486	0.693	0	4.15	As548_TRINITY_DN1112_c1_g1	0	NA	NA	NA	23485	26961	17651	chr6S	156639847	96386	166	8.8e-70	272	chr6S	331653819	96855	159
TRINITY_DN58117_c1_g2_i1	278	2	NA	NA	NA	TRINITY_DN58117_c1_g2	278	NA	NA	NA	NA	0	0	4633	0	0	0	0	0	0	0	0	0	0	0	0	3028	0	0	0	0	As548_TRINITY_DN19818_c0_g1	8.74e-31	NA	NA	NA	0	3307	0	NA	NA	NA	NA	NA	NA	NA	NA	NA	NA
TRINITY_DN58247_c0_g2_i1	298	2	NA	NA	NA	TRINITY_DN58247_c0_g2	298	NA	NA	NA	NA	0	0	2236	0	0	0	0	0	0	0	0	0	0	0	2246	0	0	0	0	0	As548_TRINITY_DN12327_c0_g2	2.26e-136	NA	NA	NA	0	0	3744	NA	NA	NA	NA	NA	NA	NA	NA	NA	NA
TRINITY_DN5838_c1_g1_i1	3466	2	NA	NA	NA	TRINITY_DN5838_c1_g1	4613	NA	NA	NA	jcf7180001940910	0.257	1493	0.568	0	0.831	0.558	0	0.601	0.499	0.466	0	0.181	0.772	0	0.336	0.874	0	0	0.355	0.419	As548_TRINITY_DN24733_c0_g2	0	NA	NA	NA	2567	20425	6885	chr6B	353789357	99184	245	4.45e-121	442	chr6B	353789113	98776	245
TRINITY_DN5841_c0_g1_i2	3967	2	NA	NA	NA	TRINITY_DN5841_c0_g1	5344	NA	NA	NA	NA	0.298	0.614	0.313	0	0.679	0.052	0	0.371	0.197	0.553	0.826	0.491	0.459	0.583	0.24	0.531	0.421	0.194	0	0	As548_TRINITY_DN11658_c0_g1	0	NA	NA	NA	1019	2709	1.73	NA	NA	NA	NA	NA	NA	NA	NA	NA	NA
TRINITY_DN5845_c0_g1_i13	4586	2	NA	NA	NA	TRINITY_DN5845_c0_g1	5039	NA	NA	NA	jcf7180001529332	0.339	0.915	0.544	0	1004	0.134	0	1388	0.488	0.141	2334	0.704	0.499	1802	0.384	1.03	1384	0	0	0.514	As548_TRINITY_DN7967_c0_g1	0	NA	NA	NA	4445	4565	15534	chr6B	526037061	98.58	845	0	1495	chr6B	526032279	97043	744
TRINITY_DN5847_c0_g1_i11	4581	2	NA	NA	NA	TRINITY_DN5847_c0_g1	4890	NA	NA	NA	NA	0.312	0.145	0.359	0	0.345	0.3	0.078	0.504	0.197	0.77	0.135	0.32	0.645	0.727	0.259	1.03	0.414	0.163	0.57	0.862	As548_TRINITY_DN9746_c0_g1	0	NA	NA	NA	13446	8489	8547	NA	NA	NA	NA	NA	NA	NA	NA	NA	NA
TRINITY_DN58490_c0_g1_i1	427	2	NA	NA	NA	TRINITY_DN58490_c0_g1	427	NA	NA	NA	jcf7180001567179	0	1192	0.185	0	0	0	0	0.752	0	0	0	0	0.088	0	0	0	0	0	0	0	As548_TRINITY_DN77949_c0_g1	5.94e-84	NA	NA	NA	0	0	13725	NA	NA	NA	NA	NA	NA	NA	NA	NA	NA
TRINITY_DN5849_c0_g1_i11	968	2	NA	NA	NA	TRINITY_DN5849_c0_g1	4308	NA	NA	NA	NA	0.474	0.662	1378	0.518	0.72	0.971	1018	0.327	0.779	0	1095	2581	0.899	1605	1171	1124	1538	0	0.849	1304	As548_TRINITY_DN870_c0_g1	0	NA	NA	NA	3087	4407	6669	chr6B	22711525	88095	294	3.35e-92	346	chr6B	22711167	86.78	295
TRINITY_DN5876_c0_g1_i4	1966	2	NA	NA	NA	TRINITY_DN5876_c0_g1	2989	NA	NA	NA	jcf7180001701556	0	0.072	0.023	0	0.294	0.041	1684	0	0.073	0	0.009	0.096	0.029	0.015	0.038	0.021	0.091	0	0	0	As548_TRINITY_DN7616_c0_g1	0	NA	NA	NA	5974	7802	7841	chr6B	633907578	96296	270	2.87e-121	442	chr6B	633904463	84234	444
TRINITY_DN5879_c0_g1_i1	1783	2	NA	NA	NA	TRINITY_DN5879_c0_g1	2016	NA	NA	NA	NA	0	1457	0.347	1276	0	0	0	0.142	0	0.51	0	0.459	0	1052	0.461	0.749	0.042	0.255	0.709	0	As548_TRINITY_DN19325_c0_g1	0	NA	NA	NA	3027	5084	8717	NA	NA	NA	NA	NA	NA	NA	NA	NA	NA
TRINITY_DN5886_c0_g1_i1	2233	2	NA	NA	NA	TRINITY_DN5886_c0_g1	2682	NA	NA	NA	NA	2276	6539	5166	3779	10755	3266	5513	9.94	8277	5584	8566	4756	2454	4929	4462	2123	8562	5318	4826	7376	As548_TRINITY_DN63944_c0_g1	7.46e-170	NA	NA	NA	15444	19176	12.12	NA	NA	NA	NA	NA	NA	NA	NA	NA	NA
TRINITY_DN58909_c0_g1_i1	2308	2	NA	NA	NA	TRINITY_DN58909_c0_g1	2416	NA	NA	NA	NA	0	0	0.579	0	0	0.269	0	0	0.187	0	0	0.235	0.078	0	0.547	0.042	0	0.061	0	0	As548_TRINITY_DN7397_c0_g1	0	NA	NA	NA	0.729	0	1377	NA	NA	NA	NA	NA	NA	NA	NA	NA	NA
TRINITY_DN5896_c0_g1_i8	556	2	NA	NA	NA	TRINITY_DN5896_c0_g1	1932	NA	NA	NA	NA	0	1048	0.498	0	0.507	0.982	0	0	0.685	0	0	0.715	1153	0.75	0.365	0.635	1594	0	0	0	As548_TRINITY_DN8667_c0_g1	9.08e-158	NA	NA	NA	1349	2463	2276	NA	NA	NA	NA	NA	NA	NA	NA	NA	NA
TRINITY_DN5899_c0_g1_i3	1158	2	NA	NA	NA	TRINITY_DN5899_c0_g1	3216	NA	NA	NA	NA	0	1084	1.61	0.662	2027	3317	3457	1565	1444	0.889	3223	3679	0.674	2438	1219	0.843	0.983	1335	1214	4593	As548_TRINITY_DN1671_c0_g1	1.56e-137	NA	NA	NA	2088	13388	4563	NA	NA	NA	NA	NA	NA	NA	NA	NA	NA
TRINITY_DN59056_c0_g1_i6	786	2	NA	NA	NA	TRINITY_DN59056_c0_g1	1880	NA	NA	NA	NA	0	0	0.162	0	0	0	0	0	0	0	0.045	0.032	0.411	0	0.221	0.104	0	0	0	0.648	As548_TRINITY_DN576_c1_g1	0	NA	NA	NA	13456	41026	23512	NA	NA	NA	NA	NA	NA	NA	NA	NA	NA
TRINITY_DN59067_c0_g1_i4	501	2	NA	NA	NA	TRINITY_DN59067_c0_g1	902	NA	NA	NA	jcf7180001895364	0	0.747	0.197	0	0	0.723	0	1105	0.28	0	1077	0	0.547	0.727	0.71	0.52	0	0	0	0	As548_TRINITY_DN1052_c1_g1	1.56e-132	NA	NA	NA	0.4	0.528	1263	chr6S	81607428	99554	224	8.6e-112	409	chr6S	81607447	87336	229
TRINITY_DN5919_c0_g1_i1	955	2	NA	NA	NA	TRINITY_DN5919_c0_g1	2009	NA	NA	NA	NA	15717	21979	13529	21459	35327	23109	14875	14751	13367	35218	29611	19079	13636	19443	12.6	15254	11835	22344	28718	24.87	As548_TRINITY_DN5067_c0_g1	2.07e-144	NA	NA	NA	24714	16106	36178	NA	NA	NA	NA	NA	NA	NA	NA	NA	NA
TRINITY_DN5923_c1_g1_i1	281	2	NA	NA	NA	TRINITY_DN5923_c1_g1	1232	NA	NA	NA	NA	0	8803	1077	13504	0	0	0	0	0	8848	0	0	0.489	8616	0	0	0	0	0	25731	As548_TRINITY_DN4119_c0_g1	5.02e-74	NA	NA	NA	3386	2859	1309	chr6S	53670214	95349	43	2.28e-09	69.4	chr6S	349514779	92857	42
TRINITY_DN5931_c0_g1_i5	2078	2	NA	NA	NA	TRINITY_DN5931_c0_g1	2741	NA	NA	NA	NA	32207	40392	36116	49057	92409	41608	45045	90.18	65451	40586	78.93	52503	28426	47.17	54027	38738	54006	54642	56597	86507	As548_TRINITY_DN92_c1_g2	0	NA	NA	NA	35103	36487	33367	chr6S	16798009	87391	230	7.91e-67	261	NA	NA	NA	NA
TRINITY_DN595_c0_g1_i17	1888	2	NA	NA	NA	TRINITY_DN595_c0_g1	3060	NA	NA	NA	NA	4133	8.49	3463	11578	0.517	4268	5572	10825	5795	29005	8.44	4767	9.98	2521	6381	4672	2009	16933	9028	15905	As548_TRINITY_DN1268_c0_g2	2.37e-170	NA	NA	NA	217502	346446	98689	NA	NA	NA	NA	NA	NA	NA	NA	NA	NA
TRINITY_DN5972_c0_g1_i3	1440	2	NA	NA	NA	TRINITY_DN5972_c0_g1	2878	NA	NA	NA	NA	0	0.06	0.394	3418	1784	0.827	0	1574	0.914	0.596	1688	0.459	0.43	0	0.749	0.312	1356	0	0.795	2206	As548_TRINITY_DN2704_c2_g1	6.19e-171	NA	NA	NA	3366	11136	2322	chr6S	379047005	77564	156	1.93e-13	84.2	NA	NA	NA	NA
TRINITY_DN5988_c0_g1_i1	782	2	NA	NA	NA	TRINITY_DN5988_c0_g1	2514	NA	NA	NA	NA	0.23	2264	0.347	0	1987	1199	2.34	1857	0.322	0	0.359	0.885	0.723	1.37	0.806	0.427	1784	0	0	0.957	As548_TRINITY_DN9971_c1_g1	0	NA	NA	NA	5824	9175	6088	NA	NA	NA	NA	NA	NA	NA	NA	NA	NA
TRINITY_DN5989_c0_g1_i6	2527	2	NA	NA	NA	TRINITY_DN5989_c0_g1	2952	NA	NA	NA	jcf7180001902455	0.691	2324	4946	0.867	0.456	3586	1.4	1052	3188	0	0	2293	0.665	1666	6.89	0.718	0.562	0.723	1924	0.838	As548_TRINITY_DN8612_c0_g1	0	NA	NA	NA	6943	3439	16308	NA	NA	NA	NA	NA	NA	NA	NA	NA	NA
TRINITY_DN5992_c0_g3_i2	1738	2	NA	NA	NA	TRINITY_DN5992_c0_g3	2652	NA	NA	NA	jcf7180001936841	6585	10.02	4378	1637	12316	0.351	5298	45103	4944	0.672	40278	1642	3.05	20776	2.37	2341	24724	4035	6094	65708	As548_TRINITY_DN28970_c0_g1	4.5e-157	NA	NA	NA	4495	36329	28246	chr6S	152664530	85227	88	1.06e-15	91.6	NA	NA	NA	NA
TRINITY_DN6018_c0_g1_i1	2542	2	NA	NA	NA	TRINITY_DN6018_c0_g1	3330	NA	NA	NA	NA	1043	1228	1.32	0	1804	1023	0	0.743	1423	0	1086	0.757	0.938	1764	1305	1051	1.58	0.622	0	0.901	As548_TRINITY_DN9852_c0_g1	0	NA	NA	NA	1309	3589	2686	NA	NA	NA	NA	NA	NA	NA	NA	NA	NA
TRINITY_DN60327_c1_g1_i1	332	2	NA	NA	NA	TRINITY_DN60327_c1_g1	436	NA	NA	NA	NA	0	2264	0	0	0	0	0	0	0	0	0	0	0	0	0	0	0	0	0	0	As548_TRINITY_DN8116_c1_g1	1.1e-26	NA	NA	NA	24914	46735	58028	NA	NA	NA	NA	NA	NA	NA	NA	NA	NA
TRINITY_DN6035_c0_g1_i2	2293	2	NA	NA	NA	TRINITY_DN6035_c0_g1	2839	NA	NA	NA	NA	0	0.951	0.996	0	0	0.744	0	0	1163	0.911	0	1045	0.714	0.326	0.969	0	0.716	1325	0	0	As548_TRINITY_DN1283_c0_g2	0	NA	NA	NA	1069	1715	2879	NA	NA	NA	NA	NA	NA	NA	NA	NA	NA
TRINITY_DN6035_c0_g1_i4	2711	2	NA	NA	NA	TRINITY_DN6035_c0_g1	2839	NA	NA	NA	NA	0.474	0.578	0.672	0	0.558	0.31	0	0.327	0.758	0	0.153	0.565	0.391	0.257	0.969	0.812	0.358	0.907	0	0.182	As548_TRINITY_DN1283_c0_g2	0	NA	NA	NA	1069	1715	2879	NA	NA	NA	NA	NA	NA	NA	NA	NA	NA
TRINITY_DN6040_c0_g3_i1	1442	2	NA	NA	NA	TRINITY_DN6040_c0_g3	1442	NA	NA	NA	jcf7180001890962	5176	4805	9649	7907	7643	10903	8882	5669	9389	11.7	7748	9022	5044	5633	8742	3621	2065	5104	8082	4561	As548_TRINITY_DN2674_c0_g1	1.3e-55	NA	NA	NA	10579	10978	5269	chr6B	20028001	77638	1109	3.53e-177	627	chr6B	708955287	74849	1328
TRINITY_DN6085_c0_g1_i15	3357	2	NA	NA	NA	TRINITY_DN6085_c0_g1	5487	NA	NA	NA	NA	0	0.289	0.938	0.385	0	1695	0	0.363	1257	0.065	0	1301	0.225	0.628	1123	0.666	0.344	1253	0	0.277	As548_TRINITY_DN6756_c0_g1	0	NA	NA	NA	5095	4557	9696	NA	NA	NA	NA	NA	NA	NA	NA	NA	NA
TRINITY_DN6108_c2_g1_i3	4053	2	NA	NA	NA	TRINITY_DN6108_c2_g1	4238	NA	NA	NA	NA	0.705	0.626	0.973	1167	1135	0.754	2076	0.893	0.623	0	0.53	0.938	0.831	0.242	0.48	0.822	0.78	1223	0.075	0	As548_TRINITY_DN6278_c0_g1	0	NA	NA	NA	3786	1258	2947	NA	NA	NA	NA	NA	NA	NA	NA	NA	NA
TRINITY_DN6113_c0_g1_i6	1306	2	NA	NA	NA	TRINITY_DN6113_c0_g1	4806	NA	NA	NA	NA	0.312	0	0.649	0	0.355	0	0.166	0.902	0.789	0.596	0.781	0	0.762	1446	0.441	0.114	0.147	0.418	1655	0.696	As548_TRINITY_DN34369_c0_g1	4e-120	NA	NA	NA	0	0	1081	NA	NA	NA	NA	NA	NA	NA	NA	NA	NA
TRINITY_DN6116_c0_g1_i1	5540	2	NBSLRR	321	4831	TRINITY_DN6116_c0_g1	7802	NBSLRR	952	7093	jcf7180001534211	0	0.458	0	0	0	0	0	0	0	0	0	0	0	0	0	0	0	0	0	0	As548_TRINITY_DN4720_c0_g1	0	NBSLRR	993	4760	2397	18033	7852	NA	NA	NA	NA	NA	NA	NA	NA	NA	NA
TRINITY_DN6116_c0_g1_i2	3359	2	NBSLRR	321	1715	TRINITY_DN6116_c0_g1	7802	NBSLRR	952	7093	jcf7180001538574	0.163	0.783	0.452	0	0	0.661	0	0	0	0	0	0.352	0	0	0	0.229	0.506	0	0	0	As548_TRINITY_DN4720_c0_g1	0	NBSLRR	993	4760	2397	18033	7852	NA	NA	NA	NA	NA	NA	NA	NA	NA	NA
TRINITY_DN6117_c0_g1_i6	1737	2	NA	NA	NA	TRINITY_DN6117_c0_g1	2797	NA	NA	NA	NA	0	0.53	0.324	0	1409	0.351	1156	0.531	0.426	0.011	0	0.053	0.225	0.136	0	0	0.66	0	0.258	0.158	As548_TRINITY_DN23427_c0_g1	0	NA	NA	NA	4315	8005	2504	NA	NA	NA	NA	NA	NA	NA	NA	NA	NA
TRINITY_DN6119_c0_g1_i1	1581	2	NA	NA	NA	TRINITY_DN6119_c0_g1	2091	NA	NA	NA	NA	6612	9984	0.429	5909	32651	0.723	3457	17688	0.571	3719	19349	0.523	2424	13008	1036	1321	8738	2364	3203	6.15	As548_TRINITY_DN73282_c0_g1	0	NA	NA	NA	13076	133819	9446	NA	NA	NA	NA	NA	NA	NA	NA	NA	NA
TRINITY_DN6133_c0_g1_i25	2263	2	NA	NA	NA	TRINITY_DN6133_c0_g1	3894	NA	NA	NA	NA	0.312	0.108	1124	0	2119	2429	1224	0.38	0	0.011	0.539	3541	0.782	0.886	3656	0	2135	1.6	0	3581	As548_TRINITY_DN29851_c0_g1	0	NA	NA	NA	61386	120291	127.97	NA	NA	NA	NA	NA	NA	NA	NA	NA	NA
TRINITY_DN6157_c0_g1_i19	1052	2	NA	NA	NA	TRINITY_DN6157_c0_g1	2625	NA	NA	NA	jcf7180001596732	0	0	0.22	0	0	0	0	0	0	0	1033	0	0	0	0	0	0	0	0	0	As548_TRINITY_DN11329_c0_g1	2.21e-110	NA	NA	NA	6333	5779	6509	NA	NA	NA	NA	NA	NA	NA	NA	NA	NA
TRINITY_DN6161_c1_g1_i6	516	2	NA	NA	NA	TRINITY_DN6161_c1_g1	2080	NA	NA	NA	jcf7180001634696	0	1421	0	0	0	0	0	0.416	0.353	1811	0	0.203	0	0	0	0.323	0	0	0	0	As548_TRINITY_DN8442_c0_g1	1.8e-90	NA	NA	NA	3027	6632	1036	chr6B	44465990	93.86	342	6.96e-141	507	chr6B	44465352	93927	247
TRINITY_DN6165_c0_g1_i9	1430	2	NA	NA	NA	TRINITY_DN6165_c0_g1	1717	NA	NA	NA	NA	1219	0.265	1425	2588	1034	0.816	0.441	0.371	0.488	0	0	0.821	1642	0.409	1017	0.895	0.225	0.499	1709	0	As548_TRINITY_DN12_c0_g1	0	NA	NA	NA	21278	11.91	31.99	NA	NA	NA	NA	NA	NA	NA	NA	NA	NA
TRINITY_DN61725_c0_g1_i5	1471	2	NA	NA	NA	TRINITY_DN61725_c0_g1	3669	NA	NA	NA	NA	0.203	0.096	1529	0.265	0.558	2077	0	0	2119	0	0	1557	0.89	0.076	2447	0.479	0.14	0	0.473	0	As548_TRINITY_DN3286_c0_g1	0	NA	NA	NA	0.839	0.457	3164	NA	NA	NA	NA	NA	NA	NA	NA	NA	NA
TRINITY_DN6172_c0_g1_i13	1966	2	NA	NA	NA	TRINITY_DN6172_c0_g1	2413	NA	NA	NA	jcf7180001553507	0	1192	1008	0.999	0.963	1209	0	0.584	3573	1702	0	2186	2366	2044	1123	1779	1.96	1437	0	2079	As548_TRINITY_DN4225_c0_g1	0	NA	NA	NA	3526	3703	3221	NA	NA	NA	NA	NA	NA	NA	NA	NA	NA
TRINITY_DN6172_c0_g1_i2	1732	2	NA	NA	NA	TRINITY_DN6172_c0_g1	2413	NA	NA	NA	jcf7180001711957	0	1108	0.29	0	0	1695	0	0.336	1963	0.249	0.458	1002	0.821	0.644	1478	0	0.941	0.041	0.441	0	As548_TRINITY_DN4225_c0_g1	0	NA	NA	NA	3526	3703	3221	NA	NA	NA	NA	NA	NA	NA	NA	NA	NA
TRINITY_DN6175_c0_g1_i5	4022	2	NA	NA	NA	TRINITY_DN6175_c0_g1	5654	NA	NA	NA	jcf7180001893079	0.664	0.891	0.718	0	0.72	1158	0	0.814	0.602	0.911	0.377	1066	0.723	1355	0.777	1145	1349	2129	0.441	0.609	As548_TRINITY_DN12853_c0_g1	0	NA	NA	NA	12167	13643	14225	NA	NA	NA	NA	NA	NA	NA	NA	NA	NA
TRINITY_DN61767_c0_g1_i18	728	2	NA	NA	NA	TRINITY_DN61767_c0_g1	2204	NA	NA	NA	NA	0.149	0.337	0.521	0	1693	0	0	0	0.073	1019	0	0	0	0	0	0	0	0.886	1225	0	As548_TRINITY_DN9488_c0_g1	1.79e-135	NA	NA	NA	5964	6747	9889	NA	NA	NA	NA	NA	NA	NA	NA	NA	NA
TRINITY_DN6179_c1_g1_i2	4327	2	NA	NA	NA	TRINITY_DN6179_c1_g1	4870	NA	NA	NA	NA	0	0.542	0.568	0	0.213	0.486	0	0	0.582	0	0.054	0.779	0.215	0.159	0.691	0.25	0	0.438	0.021	0	As548_TRINITY_DN8841_c0_g1	0	NA	NA	NA	0.38	0.932	1639	NA	NA	NA	NA	NA	NA	NA	NA	NA	NA
TRINITY_DN6181_c0_g1_i2	3660	2	NA	NA	NA	TRINITY_DN6181_c0_g1	6136	NA	NA	NA	NA	0.406	0.108	1286	0.217	0.264	1.22	0.029	0.336	0.717	0.412	0	1365	1329	0	1862	0.572	0.407	0	0.064	0	As548_TRINITY_DN5174_c1_g1	0	NA	NA	NA	2857	1504	5007	NA	NA	NA	NA	NA	NA	NA	NA	NA	NA
TRINITY_DN6181_c0_g1_i9	5151	2	NA	NA	NA	TRINITY_DN6181_c0_g1	6136	NA	NA	NA	NA	0.366	0.963	1807	0	0.335	2697	0	0.168	1911	0.661	0.117	2325	1496	0.553	3397	0.853	0.358	1.06	0.924	0.419	As548_TRINITY_DN5174_c1_g1	0	NA	NA	NA	2857	1504	5007	NA	NA	NA	NA	NA	NA	NA	NA	NA	NA
TRINITY_DN6184_c0_g1_i6	2669	2	NA	NA	NA	TRINITY_DN6184_c0_g1	2798	NA	NA	NA	jcf7180001536514	1328	1831	2259	0	1602	0.455	1107	1415	2752	0.596	1724	1749	0.909	2824	1948	1217	2676	0	0	0	As548_TRINITY_DN14136_c0_g1	0	NA	NA	NA	5045	4266	6384	chr6B	116180957	88789	223	1.34e-69	270	chr6B	11192540	81081	333
TRINITY_DN6184_c0_g1_i9	2669	2	NA	NA	NA	TRINITY_DN6184_c0_g1	2798	NA	NA	NA	jcf7180001536514	0	1144	0	0	1368	0.734	0.842	0.504	0	0	0	0.747	0.87	0.295	0.441	0	0.969	0	0	0	As548_TRINITY_DN14136_c0_g1	0	NA	NA	NA	5045	4266	6384	chr6B	116180957	88789	223	1.34e-69	270	chr6B	11192540	81081	333
TRINITY_DN61989_c0_g1_i2	671	2	NA	NA	NA	TRINITY_DN61989_c0_g1	777	NA	NA	NA	NA	0	0.434	1344	0	0	5384	1361	0.168	2.16	2385	0	2037	0.772	1075	3.09	0.603	0.632	1151	0	1004	As548_TRINITY_DN3386_c2_g1	9.9e-164	NA	NA	NA	75321	43973	108647	NA	NA	NA	NA	NA	NA	NA	NA	NA	NA
TRINITY_DN61_c0_g1_i16	4747	2	NA	NA	NA	TRINITY_DN61_c0_g1	11273	NBSLRR	759	2468	NA	0.149	1939	0.73	0	0.365	0.217	0	0.115	0.395	0	0.207	0.853	0.567	2309	1056	0.395	1686	0.102	0	0	As548_TRINITY_DN13877_c1_g1	0	NBSLRR	144	1329	1359	1082	0.91	chr6S	791128088	84657	919	0	898	chr6S	791126470	81075	856
TRINITY_DN61_c0_g1_i16	4747	2	NA	NA	NA	TRINITY_DN61_c0_g1	11273	NBSLRR	759	2468	NA	0.149	1939	0.73	0	0.365	0.217	0	0.115	0.395	0	0.207	0.853	0.567	2309	1056	0.395	1686	0.102	0	0	As548_TRINITY_DN13877_c1_g1	0	NBSLRR	144	1329	1359	1082	0.91	chr6S	791128088	84657	919	0	898	chr6S	791126470	81075	856
TRINITY_DN61_c0_g1_i16	4747	2	NA	NA	NA	TRINITY_DN61_c0_g1	11273	NBSLRR	3444	8891	NA	0.149	1939	0.73	0	0.365	0.217	0	0.115	0.395	0	0.207	0.853	0.567	2309	1056	0.395	1686	0.102	0	0	As548_TRINITY_DN13877_c1_g1	0	NBSLRR	144	1329	1359	1082	0.91	chr6S	791128088	84657	919	0	898	chr6S	791126470	81075	856
TRINITY_DN61_c0_g1_i16	4747	2	NA	NA	NA	TRINITY_DN61_c0_g1	11273	NBSLRR	3444	8891	NA	0.149	1939	0.73	0	0.365	0.217	0	0.115	0.395	0	0.207	0.853	0.567	2309	1056	0.395	1686	0.102	0	0	As548_TRINITY_DN13877_c1_g1	0	NBSLRR	144	1329	1359	1082	0.91	chr6S	791128088	84657	919	0	898	chr6S	791126470	81075	856
TRINITY_DN62332_c0_g1_i1	2175	2	NA	NA	NA	TRINITY_DN62332_c0_g1	2693	NA	NA	NA	NA	0.149	0	0.544	0	0.841	0.506	0	0.239	1226	0.293	0	1536	0	0.288	0.768	0.104	0.309	0	0	0.134	As548_TRINITY_DN74019_c0_g1	0	NA	NA	NA	4685	2102	10925	NA	NA	NA	NA	NA	NA	NA	NA	NA	NA
TRINITY_DN6233_c0_g1_i4	2816	2	NA	NA	NA	TRINITY_DN6233_c0_g1	3084	NA	NA	NA	NA	0.108	0.867	0.869	0.373	1064	0.382	0	1459	0.395	0.9	0.386	0.747	1095	1378	0.912	0.479	0.857	1732	0.301	1344	As548_TRINITY_DN1589_c0_g2	0	NA	NA	NA	1778	4908	3425	NA	NA	NA	NA	NA	NA	NA	NA	NA	NA
TRINITY_DN6234_c0_g1_i6	3182	2	NA	NA	NA	TRINITY_DN6234_c0_g1	3322	NA	NA	NA	NA	0.325	0.169	1089	0	0.649	0.258	0	0	1226	0.889	0.135	0.629	0.332	0.008	0.624	1186	0	0.948	0.387	0	As548_TRINITY_DN25620_c0_g1	0	NA	NA	NA	4625	3219	5474	NA	NA	NA	NA	NA	NA	NA	NA	NA	NA
TRINITY_DN6264_c0_g1_i2	1631	2	NA	NA	NA	TRINITY_DN6264_c0_g1	2775	NA	NA	NA	NA	0	2132	1.39	0.794	1166	2181	0.607	1.84	2171	0.163	1616	2304	0.196	2044	2601	0.479	3357	0	0.387	2553	As548_TRINITY_DN32197_c0_g1	0	NA	NA	NA	0.35	1399	1616	NA	NA	NA	NA	NA	NA	NA	NA	NA	NA
TRINITY_DN62659_c0_g1_i1	560	2	NA	NA	NA	TRINITY_DN62659_c0_g1	1020	NA	NA	NA	jcf7180001720911	0	0.181	0	0	0.547	0.269	0	0	0.239	0	0	0.437	0	0.318	0.931	0.52	0.337	0	0	0	As548_TRINITY_DN39570_c0_g1	5.02e-118	NA	NA	NA	0	0	1343	NA	NA	NA	NA	NA	NA	NA	NA	NA	NA
TRINITY_DN626_c0_g1_i2	1549	2	NA	NA	NA	TRINITY_DN626_c0_g1	2905	NA	NA	NA	NA	1829	3468	3197	1264	0.517	0.444	5533	3785	0.623	0.64	2056	0.416	2.18	3748	2006	3.6	2592	0	2601	0.806	As548_TRINITY_DN107_c0_g2	8.74e-115	NA	NA	NA	1668	1293	1946	NA	NA	NA	NA	NA	NA	NA	NA	NA	NA
TRINITY_DN63013_c0_g1_i2	1126	2	NA	NA	NA	TRINITY_DN63013_c0_g1	1323	NA	NA	NA	NA	0	1168	1193	0	0.912	0.568	0	0.513	1537	0	0.323	0.736	0.929	0.477	0.94	1925	1208	1946	0	0	As548_TRINITY_DN16_c0_g1	0	NA	NA	NA	5424	5339	5588	NA	NA	NA	NA	NA	NA	NA	NA	NA	NA
TRINITY_DN63062_c0_g1_i5	1455	2	NA	NA	NA	TRINITY_DN63062_c0_g1	2088	NA	NA	NA	jcf7180001910652	0	1457	0	0	0.963	0	0	1212	0.021	0	0	0	0	0.469	0.576	0	0	0	0.011	0	As548_TRINITY_DN59011_c0_g1	9.76e-163	NA	NA	NA	0	0.836	1252	chr6S	668862589	87676	284	1.62e-87	329	chr6S	237239953	87681	276
TRINITY_DN6311_c0_g2_i2	1815	2	NA	NA	NA	TRINITY_DN6311_c0_g2	2087	NA	NA	NA	jcf7180001896518	0.84	1397	2143	3719	3822	3059	1772	1265	3386	2494	1921	1.77	1672	1083	4366	1155	0.646	6083	1096	1399	As548_TRINITY_DN65307_c0_g1	1.23e-176	NA	NA	NA	0	0	1.07	chr6B	143786251	93.95	876	0	1297	chr6B	143787203	96144	389
TRINITY_DN63170_c0_g2_i2	564	2	NA	NA	NA	TRINITY_DN63170_c0_g2	608	NA	NA	NA	NA	1.91	0.253	2.34	0	0	1995	0	0	1049	1778	0	4277	1662	0	2.15	0.76	0	1966	1.01	0.775	As548_TRINITY_DN1163_c1_g1	3.9e-102	NA	NA	NA	141112	28008	289786	NA	NA	NA	NA	NA	NA	NA	NA	NA	NA
TRINITY_DN63179_c1_g1_i2	257	2	NA	NA	NA	TRINITY_DN63179_c1_g1	287	NA	NA	NA	NA	0	0	5317	0	0	0.93	0	0	0	0	0	0	0	0	0	0	0	0	0	0	As548_TRINITY_DN9000_c0_g2	1.43e-68	NA	NA	NA	6044	0	12621	NA	NA	NA	NA	NA	NA	NA	NA	NA	NA
TRINITY_DN6331_c0_g1_i6	1793	2	NA	NA	NA	TRINITY_DN6331_c0_g1	2238	NA	NA	NA	NA	1274	0.289	2838	0.722	1774	2997	0	1203	3313	1.42	1024	3509	1.75	1052	2802	2664	0.829	3464	2193	1668	As548_TRINITY_DN3265_c0_g1	0	NA	NA	NA	3257	2.78	7488	NA	NA	NA	NA	NA	NA	NA	NA	NA	NA
TRINITY_DN6337_c0_g1_i9	1746	2	NA	NA	NA	TRINITY_DN6337_c0_g1	2670	NA	NA	NA	NA	1585	1228	4112	1252	1744	6118	0.754	0.345	7104	4099	0.233	5855	2747	1696	5585	2726	1356	1885	0.903	0.704	As548_TRINITY_DN23400_c0_g1	2.2e-125	NA	NA	NA	9.96	5383	14851	NA	NA	NA	NA	NA	NA	NA	NA	NA	NA
TRINITY_DN6338_c0_g1_i7	2333	2	NA	NA	NA	TRINITY_DN6338_c0_g1	2901	NA	NA	NA	NA	0	0	0.116	0	0	0	0	0	0	0.488	0	0.021	0	0	0	0	0	0	0	0	As548_TRINITY_DN11662_c0_g1	0	NA	NA	NA	3726	3862	1935	NA	NA	NA	NA	NA	NA	NA	NA	NA	NA
TRINITY_DN6343_c0_g1_i3	896	2	NA	NA	NA	TRINITY_DN6343_c0_g1	3509	NA	NA	NA	jcf7180001584048	0.732	1192	0.023	0	0.821	0.32	0	0.327	0.197	0.813	0	0.085	0.89	0.356	0.269	0.166	0.752	0	0	0	As548_TRINITY_DN1837_c0_g1	0	NA	NA	NA	7932	22607	6123	NA	NA	NA	NA	NA	NA	NA	NA	NA	NA
TRINITY_DN634_c0_g1_i10	1639	2	NA	NA	NA	TRINITY_DN634_c0_g1	5142	NA	NA	NA	jcf7180001673257	0.108	4179	1448	0	0.71	0.31	1028	3511	0	0	2.2	0.117	0	1817	0.202	0.271	1658	0.082	0.591	1265	As548_TRINITY_DN2195_c0_g1	5.27e-154	NA	NA	NA	6044	65647	5007	chr6B	153394923	86555	119	4.39e-27	130	chr6B	153680948	89796	98
TRINITY_DN6350_c0_g1_i1	15536	2	NA	NA	NA	TRINITY_DN6350_c0_g1	15630	NA	NA	NA	NA	1382	2866	3069	1095	1.49	2956	0.617	0.999	2545	0.336	1832	2773	2151	3082	3541	2341	3196	1325	0.441	1834	As548_TRINITY_DN401_c1_g1	0	NA	NA	NA	7742	6237	9161	NA	NA	NA	NA	NA	NA	NA	NA	NA	NA
TRINITY_DN6350_c0_g1_i2	15538	2	NA	NA	NA	TRINITY_DN6350_c0_g1	15630	NA	NA	NA	NA	0.718	1529	1703	0	1247	2522	1.41	1698	1444	0	1006	2.08	1359	2317	2572	1654	2374	0.998	0.236	1549	As548_TRINITY_DN401_c1_g1	0	NA	NA	NA	7742	6237	9161	NA	NA	NA	NA	NA	NA	NA	NA	NA	NA
TRINITY_DN6352_c0_g1_i6	3600	2	NA	NA	NA	TRINITY_DN6352_c0_g1	7419	NA	NA	NA	jcf7180001640709	0	0.458	0.301	0	1044	0.186	0	0.097	0.073	0	0.144	0.725	0.274	0.076	0.393	1.02	0.337	0	0	0	As548_TRINITY_DN5167_c0_g2	0	NA	NA	NA	5424	5084	3903	chr6B	234685666	79157	1756	0	1173	chr6B	234692586	98.54	411
TRINITY_DN6355_c0_g1_i15	1262	2	NA	NA	NA	TRINITY_DN6355_c0_g1	3273	NA	NA	NA	NA	0.569	1156	0.394	0	0.537	0.62	0	0.92	0.582	0.228	0.269	0.896	0.616	1037	1132	1165	1313	1.62	0.29	0	As548_TRINITY_DN7076_c0_g1	4.33e-153	NA	NA	NA	1179	1654	2549	chr6S	248685362	89961	259	7.11e-88	331	chr6S	248685512	94521	73
TRINITY_DN6358_c0_g1_i5	935	2	NA	NA	NA	TRINITY_DN6358_c0_g1	1389	NA	NA	NA	jcf7180001554251	1382	0.891	4575	4044	0.324	6501	1547	0.31	10022	1171	3.96	6.58	2796	1817	5374	4443	0.435	5155	2311	2972	As548_TRINITY_DN16271_c0_g1	1.82e-153	NA	NA	NA	2857	5718	21691	NA	NA	NA	NA	NA	NA	NA	NA	NA	NA
TRINITY_DN6409_c1_g1_i4	1771	2	NA	NA	NA	TRINITY_DN6409_c1_g1	2091	NA	NA	NA	NA	0.271	0.518	1355	0	0.426	3018	0	0	1901	0	1149	1429	0.528	2317	1132	0.375	1089	0.897	0	0	As548_TRINITY_DN941_c0_g1	0	NA	NA	NA	29219	18015	40104	NA	NA	NA	NA	NA	NA	NA	NA	NA	NA
TRINITY_DN6409_c1_g1_i8	1516	2	NA	NA	NA	TRINITY_DN6409_c1_g1	2091	NA	NA	NA	NA	0	0.349	1332	1288	0	1664	0	0.619	1246	0	0.62	2101	0	0.689	0.758	0.968	0.871	4493	0	0	As548_TRINITY_DN941_c0_g1	0	NA	NA	NA	29219	18015	40104	NA	NA	NA	NA	NA	NA	NA	NA	NA	NA
TRINITY_DN640_c1_g1_i11	1319	2	NA	NA	NA	TRINITY_DN640_c1_g1	1941	NA	NA	NA	jcf7180001711684	4742	8755	1054	3731	3639	0.227	4573	15211	1818	0.228	8.97	0	4.77	8798	1603	3777	6785	0	5.18	9178	As548_TRINITY_DN3655_c0_g1	1.19e-151	NA	NA	NA	2657	7151	3482	chr6S	235431632	96386	83	3.53e-29	135	NA	NA	NA	NA
TRINITY_DN641_c0_g1_i26	2910	2	NA	NA	NA	TRINITY_DN641_c0_g1	3479	NA	NA	NA	NA	2032	2.24	1517	0.674	0	0	0	2998	1246	0	0	1557	0.401	0	0.461	2726	1995	0.306	0.516	0.862	As548_TRINITY_DN10217_c0_g1	0	NA	NA	NA	9.08	10459	5701	NA	NA	NA	NA	NA	NA	NA	NA	NA	NA
TRINITY_DN64217_c0_g1_i1	918	2	NA	NA	NA	TRINITY_DN64217_c0_g1	2026	NA	NA	NA	NA	0.461	0	0.834	0	0.041	0.568	0	0	0.862	0	0	1194	0.303	0.318	0.585	0.926	0.218	0	0.494	0	As548_TRINITY_DN1648_c0_g2	0	NA	NA	NA	2987	2.56	5007	NA	NA	NA	NA	NA	NA	NA	NA	NA	NA
TRINITY_DN643_c0_g1_i1	1189	2	NA	NA	NA	TRINITY_DN643_c0_g1	1288	NA	NA	NA	NA	22032	8322	32814	25.78	15.51	50.01	13367	5908	52936	36259	10478	47256	33509	10592	35564	36355	5036	32176	24526	5557	As548_TRINITY_DN937_c8_g1	0	NA	NA	NA	103462	67873	147692	NA	NA	NA	NA	NA	NA	NA	NA	NA	NA
TRINITY_DN6450_c0_g1_i4	1216	2	NA	NA	NA	TRINITY_DN6450_c0_g1	2848	NA	NA	NA	NA	0.054	1481	1066	0.542	1561	2542	0	1229	1745	1551	0.826	1536	1.74	1189	1986	2383	1398	0.805	0	0	As548_TRINITY_DN5896_c0_g1	0	NA	NA	NA	9.74	4082	5383	NA	NA	NA	NA	NA	NA	NA	NA	NA	NA
TRINITY_DN6469_c0_g1_i15	2490	2	NA	NA	NA	TRINITY_DN6469_c0_g1	3186	NA	NA	NA	NA	0	0.903	0.776	0	0	0.837	0	1698	1818	0	0.072	0.587	0	0	0.95	0	1292	0	0	0	As548_TRINITY_DN5041_c0_g1	0	NA	NA	NA	4915	4257	18345	NA	NA	NA	NA	NA	NA	NA	NA	NA	NA
TRINITY_DN64749_c0_g1_i2	625	2	NA	NA	NA	TRINITY_DN64749_c0_g1	1599	NA	NA	NA	jcf7180001895354	0	0	0.313	0	0.122	0	0	1.15	0.415	0	1.49	0	0.156	1.59	0.605	0	1953	0	0	0	As548_TRINITY_DN30941_c0_g2	1.73e-109	NA	NA	NA	0	0.132	0.683	chr6S	784926872	87903	124	1.34e-32	147	chr6S	784965477	87097	124
TRINITY_DN64749_c0_g1_i4	502	2	NA	NA	NA	TRINITY_DN64749_c0_g1	1599	NA	NA	NA	jcf7180001924312	0.474	0.506	0.637	0	0	0.61	0	0	0.904	0	0.467	0.949	1095	1651	0.844	0.26	0.119	0	0	0	As548_TRINITY_DN30941_c0_g2	1.73e-109	NA	NA	NA	0	0.132	0.683	chr6S	784926872	87903	124	1.34e-32	147	chr6S	784965477	87097	124
TRINITY_DN6496_c0_g1_i2	1371	2	NA	NA	NA	TRINITY_DN6496_c0_g1	2496	NA	NA	NA	NA	7086	13741	7726	2672	10015	7917	0	11975	8973	3405	13432	8159	5523	16809	8723	6919	11884	12216	5094	13866	As548_TRINITY_DN5458_c1_g1	0	NA	NA	NA	23396	21261	21554	NA	NA	NA	NA	NA	NA	NA	NA	NA	NA
TRINITY_DN65198_c0_g3_i1	1201	2	NA	NA	NA	TRINITY_DN65198_c0_g3	1268	NA	NA	NA	jcf7180001600255	0	0.554	0.151	0	0.243	0.558	0	0	0.114	0	0.135	0.693	0.831	0.583	0.566	0.447	0.716	0.255	0	0.158	As548_TRINITY_DN33594_c0_g1	0	NA	NA	NA	0.34	0.941	0.967	NA	NA	NA	NA	NA	NA	NA	NA	NA	NA
TRINITY_DN6523_c1_g2_i15	3253	2	NA	NA	NA	TRINITY_DN6523_c1_g2	5613	NA	NA	NA	jcf7180001526169	0.379	0.325	1158	1252	0.264	1168	0	0	1246	0.781	0.251	1269	0.88	0.121	0.892	1259	0	0.988	0.312	0.024	As548_TRINITY_DN1832_c0_g1	0	NA	NA	NA	12317	5339	30681	chr6B	477789623	97147	736	0	1243	chr6B	477788910	87048	664
TRINITY_DN65284_c0_g1_i1	220	2	NA	NA	NA	TRINITY_DN65284_c0_g1	336	NA	NA	NA	NA	0	0	25089	0	0	0	0	0	0	0	0	7604	0	0	0	0	0	0	0	0	As548_TRINITY_DN11573_c0_g1	4.34e-124	NA	NA	NA	0.26	0.449	0.797	NA	NA	NA	NA	NA	NA	NA	NA	NA	NA
TRINITY_DN6529_c0_g1_i8	3294	2	NA	NA	NA	TRINITY_DN6529_c0_g1	3647	NA	NA	NA	jcf7180001767638	0.501	2252	0.591	0	1338	1044	0.078	0.389	1309	0	1104	1002	0.743	0.348	1535	0.843	1566	3016	0	1968	As548_TRINITY_DN627_c1_g1	0	NA	NA	NA	2847	3404	2856	NA	NA	NA	NA	NA	NA	NA	NA	NA	NA
TRINITY_DN652_c0_g1_i9	2737	2	NA	NA	NA	TRINITY_DN652_c0_g1	8741	NA	NA	NA	NA	0.556	0.65	1.83	0.469	0.091	1323	0	0.398	0.447	0.683	0.557	2346	0.948	0.386	1756	1363	0	0.418	0	0	As548_TRINITY_DN13465_c0_g1	0	NA	NA	NA	3836	3835	7386	chr6B	180273696	95349	86	1.61e-28	135	chr6B	180273643	97368	38
TRINITY_DN6542_c0_g1_i12	908	2	NA	NA	NA	TRINITY_DN6542_c0_g1	3528	NA	NA	NA	NA	0.42	0.494	0.324	1336	0	0	0	0	0.052	0	0	0.139	0.753	0.485	0.048	0	0.485	0	0	0	As548_TRINITY_DN8208_c0_g1	0	NA	NA	NA	1419	2094	0.854	chr6B	157945244	82158	241	3.78e-46	193	NA	NA	NA	NA
TRINITY_DN6562_c0_g1_i5	1341	2	NA	NA	NA	TRINITY_DN6562_c0_g1	2317	NA	NA	NA	NA	1545	2132	4737	2612	1693	3483	2722	1751	4393	2667	0.952	4437	2199	1295	5422	2528	1805	1528	2547	2719	As548_TRINITY_DN1705_c0_g1	0	NA	NA	NA	9.81	7767	17947	NA	NA	NA	NA	NA	NA	NA	NA	NA	NA
TRINITY_DN6619_c0_g1_i20	1416	2	NA	NA	NA	TRINITY_DN6619_c0_g1	2344	NA	NA	NA	jcf7180001929675	0.312	0.554	0.556	0.313	0.03	0.847	1302	0	0.924	0	0	0.949	0.587	0.167	0.144	1665	0.983	0.387	0.849	0.332	As548_TRINITY_DN8152_c0_g1	1.08e-172	NA	NA	NA	5684	2613	5292	chr6S	595137783	99.74	384	0	704	chr6S	595139431	92055	365
TRINITY_DN6626_c0_g1_i10	1649	2	NA	NA	NA	TRINITY_DN6626_c0_g1	2245	NA	NA	NA	jcf7180001930289	0.854	1397	1.61	1.36	2615	2615	0	1318	3344	2819	2182	2506	1818	3.71	3378	2039	4228	1325	0.903	2.34	As548_TRINITY_DN19755_c1_g1	0	NA	NA	NA	9.26	7591	12268	chr6B	588836564	98174	493	0	861	chr6B	588832707	94333	547
TRINITY_DN66322_c1_g1_i1	1026	2	NA	NA	NA	TRINITY_DN66322_c1_g1	1026	NA	NA	NA	NA	4.16	4817	4807	4273	5707	4.32	1665	3997	6886	1887	8144	3679	2864	2688	5633	3694	3435	3.25	0	0.443	As548_TRINITY_DN2291_c0_g1	4.16e-74	NA	NA	NA	17891	27234	21.77	NA	NA	NA	NA	NA	NA	NA	NA	NA	NA
TRINITY_DN66401_c0_g1_i1	381	2	NA	NA	NA	TRINITY_DN66401_c0_g1	381	NA	NA	NA	NA	0	3396	0	0	0.132	0	0	1194	0	0	0	0	0	0	0	0	0	0	0	0	As548_TRINITY_DN26614_c0_g1	2.47e-77	NA	NA	NA	0	2217	0	NA	NA	NA	NA	NA	NA	NA	NA	NA	NA
TRINITY_DN6648_c0_g1_i2	2045	2	NA	NA	NA	TRINITY_DN6648_c0_g1	4671	NA	NA	NA	NA	0	0	0.058	0	0	0	1224	0	0.55	0	0	0	0	0	0	0	0	0	0	0	As548_TRINITY_DN7426_c0_g1	0	NA	NA	NA	14285	21613	8569	NA	NA	NA	NA	NA	NA	NA	NA	NA	NA
TRINITY_DN6656_c0_g1_i7	2851	2	NA	NA	NA	TRINITY_DN6656_c0_g1	3075	NA	NA	NA	NA	0	0.06	0	0	0	0	0	0	0	0.813	0.135	0	0	0.833	0	0	0	0	0	0	As548_TRINITY_DN3445_c0_g1	0	NA	NA	NA	8391	4275	7909	NA	NA	NA	NA	NA	NA	NA	NA	NA	NA
TRINITY_DN6664_c0_g1_i13	2581	2	NA	NA	NA	TRINITY_DN6664_c0_g1	6081	NA	NA	NA	NA	0	0	0.266	0	0	0	0	0	0	0	0	0	0	0	0	0	0	0	0	0	As548_TRINITY_DN8458_c0_g1	0	NA	NA	NA	2248	2.34	3835	NA	NA	NA	NA	NA	NA	NA	NA	NA	NA
TRINITY_DN666_c0_g1_i11	1687	2	NA	NA	NA	TRINITY_DN666_c0_g1	2737	NA	NA	NA	NA	2913	6865	0.151	0.036	3984	0.103	2869	5678	1174	0.022	8494	0.075	3138	3975	0.566	5816	3512	0	0.086	3138	As548_TRINITY_DN9531_c0_g1	1.71e-141	NA	NA	NA	19.12	40481	11801	NA	NA	NA	NA	NA	NA	NA	NA	NA	NA
TRINITY_DN66747_c0_g1_i4	1610	2	NA	NA	NA	TRINITY_DN66747_c0_g1	1793	NA	NA	NA	jcf7180001893087	0.19	0.674	0.625	0	0.699	0.971	0	0.522	0.966	0.347	0.287	0.576	0.499	0.5	0.912	0.406	1145	0.856	0	0	As548_TRINITY_DN12240_c0_g1	0	NA	NA	NA	2168	4.02	1753	chr6B	225871220	98677	756	0	1339	chr6B	225870369	98397	312
TRINITY_DN6679_c0_g1_i1	2244	2	NA	NA	NA	TRINITY_DN6679_c0_g1	3594	NA	NA	NA	NA	1924	2385	1784	0.373	1956	1509	0	1061	2306	0.987	2011	2965	2004	3634	2658	3153	2.95	1946	1365	2435	As548_TRINITY_DN2754_c1_g1	0	NA	NA	NA	18401	8216	7966	NA	NA	NA	NA	NA	NA	NA	NA	NA	NA
TRINITY_DN6683_c0_g1_i7	287	2	NA	NA	NA	TRINITY_DN6683_c0_g1	1458	NA	NA	NA	NA	0	4.48	0.463	0	0	0	0	0	0	0	0	1738	1.29	0	0	0	0	0	0	0	As548_TRINITY_DN21011_c0_g1	2.89e-42	NA	NA	NA	0	1821	1445	NA	NA	NA	NA	NA	NA	NA	NA	NA	NA
TRINITY_DN668_c0_g1_i6	350	2	NA	NA	NA	TRINITY_DN668_c0_g1	2430	NA	NA	NA	NA	5488	21.34	25413	75463	176394	72.54	62359	114041	188284	73072	133242	101763	7419	45663	52357	15597	47495	66094	51836	156934	As548_TRINITY_DN2322_c0_g2	2.27e-35	NA	NA	NA	1888	0.607	1582	chr6S	82675560	91473	129	2.61e-41	176	chr6S	275930909	90299	134
TRINITY_DN6703_c0_g1_i7	1986	2	NA	NA	NA	TRINITY_DN6703_c0_g1	2735	NA	NA	NA	jcf7180001713843	0.962	1072	0.347	0	1257	0.806	1283	1565	1132	0.759	0.871	0.875	1007	1469	0.825	0.687	1559	0	0.752	0.893	As548_TRINITY_DN2326_c0_g1	0	NA	NA	NA	3586	20021	11175	NA	NA	NA	NA	NA	NA	NA	NA	NA	NA
TRINITY_DN6728_c0_g1_i8	2124	2	NA	NA	NA	TRINITY_DN6728_c0_g1	2939	NA	NA	NA	NA	0	0	0.591	0	0	0.651	0.588	0	0.706	0.824	1526	0.459	1.75	2544	1094	0	0.927	0	0	2545	As548_TRINITY_DN9474_c0_g1	0	NA	NA	NA	3227	3228	1696	NA	NA	NA	NA	NA	NA	NA	NA	NA	NA
TRINITY_DN6730_c0_g1_i2	891	2	NA	NA	NA	TRINITY_DN6730_c0_g1	1353	NA	NA	NA	jcf7180001565474	1829	2722	2896	0	3.72	1674	2634	2662	3105	2234	4121	2613	3206	4861	2207	3413	5141	2078	4.6	2759	As548_TRINITY_DN257_c1_g1	3.28e-81	NA	NA	NA	9.39	13766	10288	NA	NA	NA	NA	NA	NA	NA	NA	NA	NA
TRINITY_DN6731_c0_g1_i14	3441	2	NA	NA	NA	TRINITY_DN6731_c0_g1	4447	NA	NA	NA	jcf7180001936770	0.921	0.638	1077	0.325	0	1829	0.979	0	1277	0.564	0.799	0.938	2033	1931	1516	2227	2.36	0.652	0.494	0.719	As548_TRINITY_DN3619_c0_g1	0	NA	NA	NA	8851	11295	11733	chr6B	645549091	98257	1951	0	3397	chr6B	645551607	97627	632
TRINITY_DN6732_c0_g1_i3	1724	2	NA	NA	NA	TRINITY_DN6732_c0_g1	2377	NA	NA	NA	jcf7180001549394	5731	5.07	7216	9592	15337	1612	5.67	8181	8028	4706	13.98	6825	10802	8298	6679	7606	9721	0	3396	5099	As548_TRINITY_DN4290_c1_g3	0	NA	NA	NA	26692	38748	38272	chr6S	696811598	85333	225	1.49e-58	233	chr6S	696811078	78571	322
TRINITY_DN6751_c0_g1_i4	663	2	NA	NA	NA	TRINITY_DN6751_c0_g1	2665	NA	NA	NA	NA	0	0	0.29	0	0	0.661	0	0.522	0.561	0.943	0.431	0.949	0.186	0	0.518	0.499	0.646	1987	0	0	As548_TRINITY_DN3807_c0_g2	3.62e-133	NA	NA	NA	2158	4134	5758	chr6S	789065792	80859	256	1.02e-45	191	chr6S	38421466	79681	251
TRINITY_DN675_c0_g1_i1	1859	2	NA	NA	NA	TRINITY_DN675_c0_g1	3471	NA	NA	NA	NA	0.84	2264	4402	1.89	7724	11079	1802	3308	11102	3101	4893	10291	2.6	4543	7284	3174	5521	6358	1139	4957	As548_TRINITY_DN63866_c0_g1	6.71e-67	NA	NA	NA	0.869	0.554	0.512	NA	NA	NA	NA	NA	NA	NA	NA	NA	NA
TRINITY_DN6778_c0_g1_i26	6786	2	NA	NA	NA	TRINITY_DN6778_c0_g1	11408	NA	NA	NA	NA	0	0.554	0.88	0.301	0.365	0.837	0	0.177	0.717	0.629	0.341	0.938	0.371	0.447	1238	0.395	0.625	0.265	0.107	0.079	As548_TRINITY_DN16258_c0_g1	0	NA	NA	NA	1988	2014	4563	NA	NA	NA	NA	NA	NA	NA	NA	NA	NA
TRINITY_DN6778_c0_g1_i28	11055	2	NA	NA	NA	TRINITY_DN6778_c0_g1	11408	NA	NA	NA	NA	0.23	0.566	0.718	0.084	0.081	0.961	0	0.318	0.727	0.271	0	1141	0.244	0.522	0.787	0.614	0.927	0.764	0	0.277	As548_TRINITY_DN16258_c0_g1	0	NA	NA	NA	1988	2014	4563	NA	NA	NA	NA	NA	NA	NA	NA	NA	NA
TRINITY_DN6778_c0_g1_i50	10997	2	NA	NA	NA	TRINITY_DN6778_c0_g1	11408	NA	NA	NA	NA	0.23	0	0.938	0	0.274	0.889	0	0.115	0.862	0	0	0.875	0.489	0.182	0.979	0.354	0.471	0.408	0	0.055	As548_TRINITY_DN16258_c0_g1	0	NA	NA	NA	1988	2014	4563	NA	NA	NA	NA	NA	NA	NA	NA	NA	NA
TRINITY_DN6787_c0_g1_i2	1484	2	NA	NA	NA	TRINITY_DN6787_c0_g1	2118	NA	NA	NA	jcf7180001529542	0.786	1662	0.811	0	0.993	0.982	1.4	3378	1257	0.607	3116	0.715	1007	0.53	1084	0.572	1405	1803	0	0.83	As548_TRINITY_DN19749_c0_g1	0	NA	NA	NA	3706	4671	2413	chr6B	582867361	98684	228	2.66e-110	405	chr6B	582865475	93548	248
TRINITY_DN6801_c0_g1_i1	6050	2	NA	NA	NA	TRINITY_DN6801_c0_g1	6449	NA	NA	NA	jcf7180001528017	0.312	1.77	1471	0.855	1085	1581	0.666	1548	2347	0.824	1221	1877	1261	1166	1468	1238	1917	0.581	0	0.379	As548_TRINITY_DN9149_c0_g1	0	NA	NA	NA	3267	3598	4222	NA	NA	NA	NA	NA	NA	NA	NA	NA	NA
TRINITY_DN6806_c0_g1_i13	1967	2	NA	NA	NA	TRINITY_DN6806_c0_g1	3607	NA	NA	NA	jcf7180001534273	0	1493	0.069	0	0	0.145	0	0	0.114	0	0.736	0.043	0.293	0	0.585	0	0.499	0	0	0	As548_TRINITY_DN7578_c0_g1	1.78e-127	NA	NA	NA	1279	3554	3676	chr6S	34773223	92823	209	3.7e-76	292	chr6S	34774392	94505	182
TRINITY_DN6824_c0_g1_i7	3373	2	NA	NA	NA	TRINITY_DN6824_c0_g1	6071	NA	NA	NA	jcf7180001892143	0	0.265	0.069	0	0	0.103	0	0.133	0.01	0	0	0.021	0	0	0.029	0.042	0.035	0	0.086	0	As548_TRINITY_DN3255_c0_g2	0	NA	NA	NA	0.4	1882	1138	chr6B	156531902	92998	1771	0	2577	chr6B	156739688	84291	1757
TRINITY_DN6835_c0_g1_i13	2743	2	NA	NA	NA	TRINITY_DN6835_c0_g1	3393	NA	NA	NA	NA	0.366	0	0.695	0.855	0.162	0.754	0	0	0.53	0	0	0.661	0.987	0.061	0.873	0.26	0	0.132	0.129	0.261	As548_TRINITY_DN1290_c0_g1	0	NA	NA	NA	7033	2639	8478	chr6S	556315707	89781	274	2.63e-92	346	chr6S	556315081	89542	153
TRINITY_DN6858_c0_g1_i10	1163	2	NA	NA	NA	TRINITY_DN6858_c0_g1	3932	NA	NA	NA	NA	0.068	0.181	1135	0.445	0.649	1943	0	0.469	1568	0	0	1653	0.45	0.492	1353	1.28	0.197	1.63	1171	0.711	As548_TRINITY_DN1994_c0_g1	0	NA	NA	NA	6953	3088	11.54	chr6S	662417620	83673	294	6.85e-64	252	chr6S	278186523	86747	83
TRINITY_DN6861_c0_g1_i23	3381	2	NA	NA	NA	TRINITY_DN6861_c0_g1	4178	NA	NA	NA	jcf7180001901393	0	3468	0.046	0	0	0.723	0	2308	1496	0.846	0.808	0.821	0	3627	1094	0.447	2353	0	0	0.988	As548_TRINITY_DN10220_c0_g1	0	NA	NA	NA	1019	3026	1946	chr6S	159474119	96.04	303	3.94e-136	492	chr6S	159474476	92466	292
TRINITY_DN688_c0_g1_i12	7233	2	NA	NA	NA	TRINITY_DN688_c0_g1	8354	NA	NA	NA	jcf7180001867129	0	0	0.788	0	0	0.506	0	0	0.426	0	0	0.075	0.059	1878	0.71	0.146	1559	0	0	0	As548_TRINITY_DN17526_c0_g2	0	NA	NA	NA	1379	0.449	1775	chr6B	350040086	80228	703	4.73e-138	499	chr6B	224248742	95238	42
TRINITY_DN688_c0_g1_i17	7114	2	NA	NA	NA	TRINITY_DN688_c0_g1	8354	NA	NA	NA	jcf7180001867129	0	0.193	0	0.903	0	0.021	0	0.168	0	0	5468	0	3988	2688	0	5764	0	3006	3353	2332	As548_TRINITY_DN17526_c0_g2	0	NA	NA	NA	1379	0.449	1775	chr6B	350040086	80228	703	4.73e-138	499	chr6B	224248742	95238	42
TRINITY_DN688_c0_g1_i4	7128	2	NA	NA	NA	TRINITY_DN688_c0_g1	8354	NA	NA	NA	jcf7180001867129	2818	7093	5.27	0	3953	1953	2184	6642	3864	2678	2.37	3413	1241	4149	6564	1582	10557	0	0	0	As548_TRINITY_DN17526_c0_g2	0	NA	NA	NA	1379	0.449	1775	chr6B	350040086	80228	703	4.73e-138	499	chr6B	224248742	95238	42
TRINITY_DN6894_c0_g1_i2	1488	2	NA	NA	NA	TRINITY_DN6894_c0_g1	2369	NA	NA	NA	jcf7180001730800	0	9755	0	0	8708	0	0	1291	0.395	0	2263	0	0	14121	0	0	30216	6164	0.892	9.21	As548_TRINITY_DN153_c0_g3	0	NA	NA	NA	95.23	69518	73573	NA	NA	NA	NA	NA	NA	NA	NA	NA	NA
TRINITY_DN6894_c0_g2_i9	1970	2	NA	NA	NA	TRINITY_DN6894_c0_g2	3321	NA	NA	NA	jcf7180001730800	12.14	27687	9799	14322	31506	17084	5092	36083	16908	12979	36004	16477	12532	23547	12571	8803	41.11	28375	7502	20269	As548_TRINITY_DN153_c0_g1	0	NA	NA	NA	69038	104941	66153	NA	NA	NA	NA	NA	NA	NA	NA	NA	NA
TRINITY_DN6903_c0_g1_i8	11422	2	NA	NA	NA	TRINITY_DN6903_c0_g1	12369	NA	NA	NA	jcf7180001523195	0	0.349	0	0	0	0.124	0.294	0	0	0	0	0.032	0	0	0	0	0.084	0	0	0	As548_TRINITY_DN5328_c0_g1	0	NA	NA	NA	3726	4038	5622	chr6B	97822411	89778	225	1.65e-74	289	chr6B	243239962	90521	211
TRINITY_DN6912_c0_g1_i6	1762	2	NA	NA	NA	TRINITY_DN6912_c0_g1	5199	NA	NA	NA	NA	1098	0.59	2363	1613	1804	2346	0.529	0.814	1558	1767	1392	2.41	1691	1734	2284	2185	2.1	1977	0.881	1075	As548_TRINITY_DN1337_c3_g1	0	NA	NA	NA	10929	6861	7204	chr6B	247032847	91935	62	2.71e-14	87.9	chr6B	511292308	94643	56
TRINITY_DN6920_c0_g1_i13	2350	2	NA	NA	NA	TRINITY_DN6920_c0_g1	2779	NA	NA	NA	NA	0	0.602	0.208	0	0.852	0.878	0	0.124	0.862	0	0.467	0.277	0	0.719	0.777	0.479	0.365	0	0.29	0	As548_TRINITY_DN8314_c0_g1	0	NA	NA	NA	1429	4284	5929	NA	NA	NA	NA	NA	NA	NA	NA	NA	NA
TRINITY_DN6947_c0_g1_i1	2698	2	NA	NA	NA	TRINITY_DN6947_c0_g1	3050	NA	NA	NA	NA	0.176	0.397	0.313	0.409	0	0	0.294	0	0.135	0	0	0.053	0	0.167	0.192	1072	0	1375	0.602	0.142	As548_TRINITY_DN9878_c0_g1	0	NA	NA	NA	5085	3897	4142	NA	NA	NA	NA	NA	NA	NA	NA	NA	NA
TRINITY_DN694_c0_g1_i3	2518	2	NA	NA	NA	TRINITY_DN694_c0_g1	3761	NA	NA	NA	jcf7180001926650	4471	11212	4181	1408	7258	2274	16941	16069	2389	12708	20247	3925	14233	15832	4433	8189	18086	1681	2214	2727	As548_TRINITY_DN12594_c1_g1	0	NA	NA	NA	33605	20.1	11357	chr6S	365631891	100	97	3.14e-42	180	chr6S	615890984	100	97
TRINITY_DN6956_c1_g2_i2	2621	2	NA	NA	NA	TRINITY_DN6956_c1_g2	3088	NA	NA	NA	NA	0.461	0	0.811	0	0.061	1292	0	0	1485	0	0.925	2911	0.225	1204	3186	0.76	0	0	0	0.427	As548_TRINITY_DN1282_c1_g1	0	NA	NA	NA	6194	3782	17776	NA	NA	NA	NA	NA	NA	NA	NA	NA	NA
TRINITY_DN6956_c1_g2_i4	2741	2	NA	NA	NA	TRINITY_DN6956_c1_g2	3088	NA	NA	NA	NA	0	0.397	0.776	0	0	0	0	0	0.893	0	0	1258	0.479	0	0.816	0	0	0	0	0	As548_TRINITY_DN1282_c1_g1	0	NA	NA	NA	6194	3782	17776	NA	NA	NA	NA	NA	NA	NA	NA	NA	NA
TRINITY_DN69826_c0_g1_i3	916	2	NA	NA	NA	TRINITY_DN69826_c0_g1	1095	NA	NA	NA	NA	0	0.65	0.579	0	0.497	0.434	0	0.663	1568	0.282	1.93	1493	1007	0.697	0.422	1165	1728	2364	0	0	As548_TRINITY_DN100567_c0_g1	0	NA	NA	NA	1798	1962	1.98	NA	NA	NA	NA	NA	NA	NA	NA	NA	NA
TRINITY_DN6982_c0_g1_i4	1424	2	NA	NA	NA	TRINITY_DN6982_c0_g1	1836	NA	NA	NA	NA	26449	36.37	28.17	16067	10.36	21517	20966	30051	26868	17869	26289	21511	23627	40704	36283	31662	40956	22598	10146	20008	As548_TRINITY_DN312_c0_g1	0	NA	NA	NA	81545	64328	76475	NA	NA	NA	NA	NA	NA	NA	NA	NA	NA
TRINITY_DN69878_c0_g1_i2	942	2	NA	NA	NA	TRINITY_DN69878_c0_g1	1359	NA	NA	NA	NA	0	0	0.081	2672	0	0.196	0	0.849	0	0	0.961	0	0	0	0.24	1946	1672	0	0	0	As548_TRINITY_DN8205_c0_g1	2.11e-33	NA	NA	NA	5205	2674	2902	chr6B	44537317	87151	179	8.58e-49	200	chr6B	44539430	85714	154
TRINITY_DN6993_c2_g1_i5	1226	2	NA	NA	NA	TRINITY_DN6993_c2_g1	1437	NA	NA	NA	NA	0	0.988	0.811	0.373	0.912	0.878	1283	0.265	1766	0.857	0.853	1.28	0.244	1817	0.825	0.697	1426	0	0.204	0	As548_TRINITY_DN7016_c0_g1	0	NA	NA	NA	1868	3457	3755	NA	NA	NA	NA	NA	NA	NA	NA	NA	NA
TRINITY_DN6994_c0_g1_i6	1897	2	NA	NA	NA	TRINITY_DN6994_c0_g1	2574	NA	NA	NA	NA	0.257	1204	0.278	0	0.497	0.506	0	0.08	0.488	0.423	0.108	0.437	0.44	0.666	0.499	0.458	0.702	0.53	0	0.506	As548_TRINITY_DN28684_c1_g1	2.39e-40	NA	NA	NA	1039	0.194	2595	chr6S	492074663	85477	241	3.48e-60	239	chr6S	8390833	96296	54
TRINITY_DN69_c1_g1_i17	3379	2	NA	NA	NA	TRINITY_DN69_c1_g1	4462	NA	NA	NA	jcf7180001657746	1328	2288	0.707	1661	0	1137	1498	0	1298	1746	0.961	2208	1994	2658	0.691	2487	4088	2517	1376	0	As548_TRINITY_DN22081_c0_g1	0	NA	NA	NA	20658	44501	11175	chr6S	142337251	84211	76	1.81e-10	75	NA	NA	NA	NA
TRINITY_DN69_c1_g1_i19	3382	2	NA	NA	NA	TRINITY_DN69_c1_g1	4462	NA	NA	NA	jcf7180001657746	0	1168	0.452	0	6417	1085	0	4.13	1963	0	4453	1386	0.01	2279	1171	0.01	2023	0	0.011	3866	As548_TRINITY_DN22081_c0_g1	0	NA	NA	NA	20658	44501	11175	chr6S	142337251	84211	76	1.81e-10	75	NA	NA	NA	NA
TRINITY_DN7008_c0_g1_i3	3956	2	NA	NA	NA	TRINITY_DN7008_c0_g1	4316	NA	NA	NA	jcf7180001522126	0.461	0	0.602	0.168	0	0.475	1753	0.407	0.758	1008	0.287	0.832	2033	0.356	0.48	1.8	0.253	0.408	0.333	0	As548_TRINITY_DN10259_c2_g1	0	NA	NA	NA	7123	5445	4472	chr6B	92344865	83008	359	9.47e-83	315	NA	NA	NA	NA
TRINITY_DN7008_c0_g1_i6	3956	2	NA	NA	NA	TRINITY_DN7008_c0_g1	4316	NA	NA	NA	jcf7180001522126	2073	1722	2.27	0.168	1926	1054	0	0.31	1402	0.867	0.35	1738	1369	0.962	2073	1873	0.646	1793	1816	0.68	As548_TRINITY_DN10259_c2_g1	0	NA	NA	NA	7123	5445	4472	chr6B	92344865	83008	359	9.47e-83	315	NA	NA	NA	NA
TRINITY_DN7024_c0_g1_i6	1856	2	NA	NA	NA	TRINITY_DN7024_c0_g1	2378	NA	NA	NA	NA	2141	3505	1691	1601	3132	1302	0	2317	2191	0.564	3421	2005	1584	2211	1919	1561	3196	0.835	0.903	3202	As548_TRINITY_DN10745_c0_g1	0	NA	NA	NA	4995	6307	5326	NA	NA	NA	NA	NA	NA	NA	NA	NA	NA
TRINITY_DN7027_c0_g1_i1	3584	2	NA	NA	NA	TRINITY_DN7027_c0_g1	4561	NA	NA	NA	jcf7180001549815	0	2108	1193	0.108	1703	3297	0.078	0.327	0.831	1193	0.162	1984	3187	0.795	1574	0.874	2648	0.173	0	0	As548_TRINITY_DN8959_c0_g3	0	NA	NA	NA	2158	2841	3972	chr6B	585814521	95531	716	0	1138	chr6B	585796926	99479	192
TRINITY_DN702_c0_g6_i1	1607	2	NA	NA	NA	TRINITY_DN702_c0_g6	1607	NA	NA	NA	jcf7180001730942	3455	4287	1888	7919	5271	1519	9205	4829	1.88	11331	4139	1589	4282	1696	1852	4245	2297	2201	8716	2237	As548_TRINITY_DN8970_c0_g4	1.68e-134	NA	NA	NA	6613	10793	6487	chr6S	81164237	89524	210	3.56e-68	265	chr6S	766953364	84.08	201
TRINITY_DN7041_c0_g1_i9	1497	2	NA	NA	NA	TRINITY_DN7041_c0_g1	2304	NA	NA	NA	jcf7180001541543	0	0	0.452	0	0	0.372	0	0	0.384	0	0	0.032	0	0	0.134	0	0	0	0	0.19	As548_TRINITY_DN13419_c0_g1	0	NA	NA	NA	4455	3906	5.61	chr6B	653303654	96.45	169	1.83e-72	279	NA	NA	NA	NA
TRINITY_DN7051_c0_g1_i12	1365	2	NA	NA	NA	TRINITY_DN7051_c0_g1	2501	NA	NA	NA	NA	0	0.482	0.417	0	0.618	0.444	0.793	0.557	0.467	0.325	0	0.48	0.332	0.424	0.796	0.562	0.955	0	0.301	0	As548_TRINITY_DN2440_c0_g1	0	NA	NA	NA	1369	2067	3585	NA	NA	NA	NA	NA	NA	NA	NA	NA	NA
TRINITY_DN7058_c0_g1_i6	1669	2	NA	NA	NA	TRINITY_DN7058_c0_g1	2086	NA	NA	NA	jcf7180001896519	4282	8587	6394	1601	8667	6656	5.67	14194	8568	0	9248	7849	5.66	9654	7322	7.2	8948	7234	2268	6316	As548_TRINITY_DN17325_c0_g1	0	NA	NA	NA	8961	12676	9366	chr6S	164364294	98128	374	0	652	chr6S	164364593	98494	332
TRINITY_DN705_c0_g1_i1	7079	2	NA	NA	NA	TRINITY_DN705_c0_g1	7686	NA	NA	NA	NA	0.054	0.048	0.521	0.156	0.669	0.537	0.852	0.486	0.291	0	1203	0.277	1281	0.288	0.662	1373	1.18	0	0	0	As548_TRINITY_DN615_c0_g1	0	NA	NA	NA	2637	4988	3095	NA	NA	NA	NA	NA	NA	NA	NA	NA	NA
TRINITY_DN7088_c0_g1_i2	1101	2	NA	NA	NA	TRINITY_DN7088_c0_g1	1795	NA	NA	NA	NA	1192	1903	0.811	0.879	1135	0.713	1028	0.548	2191	0	0.691	1365	1662	0.863	1036	0.718	0.815	1732	0	0.775	As548_TRINITY_DN2923_c0_g1	1.76e-179	NA	NA	NA	6164	6254	4552	NA	NA	NA	NA	NA	NA	NA	NA	NA	NA
TRINITY_DN71083_c0_g1_i1	1481	2	NA	NA	NA	TRINITY_DN71083_c0_g1	1931	NA	NA	NA	NA	0.312	0.181	0.347	0	0.365	0.269	0.343	0	0.364	0.087	0.808	0.704	0.704	0.78	0.451	0.864	0.59	0	0	0.545	As548_TRINITY_DN10354_c0_g1	0	NA	NA	NA	1399	0.95	0.444	NA	NA	NA	NA	NA	NA	NA	NA	NA	NA
TRINITY_DN7121_c0_g1_i3	1934	2	NA	NA	NA	TRINITY_DN7121_c0_g1	2318	NA	NA	NA	NA	0.528	1481	0.822	1071	0.983	0.382	0.519	0.548	0.291	0.867	1086	0.789	1232	0.492	0.749	1.02	0.653	0.408	1236	0.814	As548_TRINITY_DN1594_c0_g1	0	NA	NA	NA	4695	6808	5.11	NA	NA	NA	NA	NA	NA	NA	NA	NA	NA
TRINITY_DN71314_c0_g1_i3	1297	2	NA	NA	NA	TRINITY_DN71314_c0_g1	1716	NA	NA	NA	NA	0	0	0.521	1396	0	3193	0	0.035	0.675	0	0	0.864	0.235	0.863	0.729	0	0.197	0.448	0	0	As548_TRINITY_DN6227_c0_g1	0	NA	NA	NA	29299	17276	42255	NA	NA	NA	NA	NA	NA	NA	NA	NA	NA
TRINITY_DN7149_c0_g1_i2	2571	2	NA	NA	NA	TRINITY_DN7149_c0_g1	3125	NA	NA	NA	NA	0.406	0	2027	0	0	1716	0	0.027	2202	0	0.162	2666	0	0	2562	0.042	0.077	1569	0	0.474	As548_TRINITY_DN3505_c0_g1	0	NA	NA	NA	1678	1803	4893	NA	NA	NA	NA	NA	NA	NA	NA	NA	NA
TRINITY_DN714_c0_g1_i33	1451	2	NA	NA	NA	TRINITY_DN714_c0_g1	3580	NA	NA	NA	jcf7180001929399	2.48	3071	0.73	0	6609	0	0	4316	0	1399	5306	0	0	4.52	0.432	1155	3463	0	0	0	As548_TRINITY_DN45_c1_g1	0	NA	NA	NA	16862	82.66	9002	chr6B	473214905	95539	269	4.49e-115	422	chr6B	473541030	81888	392
TRINITY_DN7164_c0_g1_i2	2063	2	NA	NA	NA	TRINITY_DN7164_c0_g1	2355	NA	NA	NA	NA	0.501	1758	0.486	1204	0.527	0.486	0	1212	1122	1.41	1212	0.629	1065	1764	0.816	1384	2458	0.917	0	1.36	As548_TRINITY_DN924_c0_g1	0	NA	NA	NA	4815	6404	2936	NA	NA	NA	NA	NA	NA	NA	NA	NA	NA
TRINITY_DN7171_c0_g1_i1	3169	2	NA	NA	NA	TRINITY_DN7171_c0_g1	4063	NA	NA	NA	jcf7180001562614	1355	2.89	0.753	0	0.649	0.579	1518	4776	0.519	1247	4247	0.693	1701	5785	0.864	1.53	3561	0.346	0.527	1889	As548_TRINITY_DN1001_c0_g1	0	NA	NA	NA	5804	4126	3243	chr6B	32797147	89902	307	1.11e-106	394	NA	NA	NA	NA
TRINITY_DN7177_c0_g2_i1	1564	2	NA	NA	NA	TRINITY_DN7177_c0_g2	2188	NA	NA	NA	jcf7180001914350	0.718	1361	0.857	0	1277	0.92	0	0.548	0.395	0	0.602	0.938	0.518	0.681	0.432	0.666	1517	0.998	0.849	0.783	As548_TRINITY_DN9331_c0_g1	0	NA	NA	NA	2198	3193	4928	chr6B	211214800	96213	581	0	950	chr6B	211214524	100	339
TRINITY_DN7177_c0_g2_i2	1538	2	NA	NA	NA	TRINITY_DN7177_c0_g2	2188	NA	NA	NA	jcf7180001914350	0.217	1819	0.938	0	0.639	0.382	0	0	0.395	0.943	0.817	0.32	0.411	1189	1075	0.208	1068	0.866	0	0	As548_TRINITY_DN9331_c0_g1	0	NA	NA	NA	2198	3193	4928	chr6B	211214800	96213	581	0	950	chr6B	211214524	100	339
TRINITY_DN71953_c0_g1_i4	756	2	NA	NA	NA	TRINITY_DN71953_c0_g1	1302	NA	NA	NA	NA	0.583	0	0.95	0	6194	0.723	2037	5218	1901	0	1652	0.811	1173	2067	1641	2882	3371	1.63	2182	9557	As548_TRINITY_DN324_c3_g1	2.35e-107	NA	NA	NA	0.39	2269	1081	NA	NA	NA	NA	NA	NA	NA	NA	NA	NA
TRINITY_DN7214_c0_g1_i7	2309	2	NA	NA	NA	TRINITY_DN7214_c0_g1	2991	NA	NA	NA	NA	0	0.157	2652	0.241	0	2.16	0.255	0	1724	0.239	0	3.21	0.235	0.583	2265	0.458	0.211	1651	0.806	0.19	As548_TRINITY_DN18539_c0_g1	0	NA	NA	NA	5125	3263	23682	NA	NA	NA	NA	NA	NA	NA	NA	NA	NA
TRINITY_DN7222_c0_g1_i5	781	2	NA	NA	NA	TRINITY_DN7222_c0_g1	3087	NA	NA	NA	NA	0.623	1397	0.625	0	0.77	0.248	0	2857	0.208	0.716	2263	0	0.371	1.37	0.566	0.437	1117	1987	0	1565	As548_TRINITY_DN282_c0_g2	0	NA	NA	NA	5484	28694	5.28	chr6S	617751144	87282	401	6.38e-123	448	chr6S	111701894	96377	138
TRINITY_DN7223_c0_g1_i14	2027	2	NA	NA	NA	TRINITY_DN7223_c0_g1	2702	NA	NA	NA	NA	0	0.169	0.232	0	0.142	0	0	0.354	0.28	0	0	0.245	0	0.212	0.173	0	0.808	0	0	0.443	As548_TRINITY_DN4893_c0_g1	4.46e-177	NA	NA	NA	2747	12253	4996	NA	NA	NA	NA	NA	NA	NA	NA	NA	NA
TRINITY_DN7246_c0_g1_i8	1283	2	NA	NA	NA	TRINITY_DN7246_c0_g1	2035	NA	NA	NA	jcf7180001522011	3753	5443	3625	5825	4785	3783	2438	3051	4372	5432	6348	3775	9961	6042	3196	9375	3343	4.85	4.74	4719	As548_TRINITY_DN6150_c0_g1	0	NA	NA	NA	6154	7.09	7056	chr6B	511279262	87.2	125	2.21e-31	143	NA	NA	NA	NA
TRINITY_DN7265_c0_g1_i13	456	2	NA	NA	NA	TRINITY_DN7265_c0_g1	2787	NA	NA	NA	jcf7180001891247	1098	0	1425	0	1.47	2491	0	0.274	0.654	0	0	1002	1056	0.818	1689	3486	0.077	0	3.45	0	As548_TRINITY_DN79_c3_g1	6.52e-111	NA	NA	NA	4685	1056	2674	chr6B	676123992	97222	288	3.39e-135	488	chr6B	676136795	92115	279
TRINITY_DN72729_c0_g1_i1	1622	2	NA	NA	NA	TRINITY_DN72729_c0_g1	1816	NA	NA	NA	jcf7180001601102	0.135	0	0.232	0	0.507	0.093	0	0.203	0.177	0	0.916	0.8	0.156	0	0	0.042	0	0	0.021	0	As548_TRINITY_DN18056_c0_g1	0	NA	NA	NA	1538	1469	2822	NA	NA	NA	NA	NA	NA	NA	NA	NA	NA
TRINITY_DN7279_c0_g1_i9	1767	2	NA	NA	NA	TRINITY_DN7279_c0_g1	2050	NA	NA	NA	jcf7180001549703	0.528	0.397	1749	0.493	1409	1375	0	1132	2.97	1486	0	2229	0	0.651	0.422	0.749	1.44	2995	0.752	0	As548_TRINITY_DN11668_c0_g1	0	NA	NA	NA	0.549	0.642	1423	chr6S	461834126	89521	334	1.19e-113	416	chr6S	461835258	98312	237
TRINITY_DN7303_c0_g1_i6	1813	2	NA	NA	NA	TRINITY_DN7303_c0_g1	2692	NA	NA	NA	NA	0.149	0.578	1205	0.842	0.466	0.083	0.333	0.486	0.769	0.401	0.898	0.405	0.029	0.061	0.393	0.666	0.653	1783	0	3589	As548_TRINITY_DN1597_c0_g1	0	NA	NA	NA	3746	9.57	5963	NA	NA	NA	NA	NA	NA	NA	NA	NA	NA
TRINITY_DN7307_c0_g1_i1	3155	2	NA	NA	NA	TRINITY_DN7307_c0_g1	3532	NA	NA	NA	jcf7180001935707	0.23	1012	1274	0.265	0.223	0.93	0.333	0.566	1132	0.466	0.054	0.672	0.587	0.477	1171	0.603	0.815	0.428	0.462	0.372	As548_TRINITY_DN4800_c0_g1	0	NA	NA	NA	5314	3334	2925	chr6S	627268064	98.2	1000	0	1748	chr6S	627270117	98.2	1000
TRINITY_DN7307_c0_g1_i7	3157	2	NA	NA	NA	TRINITY_DN7307_c0_g1	3532	NA	NA	NA	jcf7180001935707	0.759	1168	0.614	0	0.405	0.93	0	0.46	0.623	0	0.512	1109	0.772	0.409	0.768	1.03	1082	1.09	0.279	0.68	As548_TRINITY_DN4800_c0_g1	0	NA	NA	NA	5314	3334	2925	chr6S	627268064	98.2	1000	0	1748	chr6S	627270117	98.2	1000
TRINITY_DN7315_c0_g1_i3	4024	2	NA	NA	NA	TRINITY_DN7315_c0_g1	4648	NA	NA	NA	NA	0.461	1782	0.185	0	3426	0.393	0.92	3201	0.737	0.152	3295	0.245	0.978	4.02	0.211	1.03	2234	0	0	2648	As548_TRINITY_DN8377_c0_g1	0	NA	NA	NA	3566	7371	1195	NA	NA	NA	NA	NA	NA	NA	NA	NA	NA
TRINITY_DN73221_c0_g1_i2	681	2	NA	NA	NA	TRINITY_DN73221_c0_g1	767	NA	NA	NA	NA	0	0	0.591	0	0	1643	0	0	1.08	0	0	1013	0.596	1242	1094	0	0	0.774	0	0	As548_TRINITY_DN16526_c1_g1	0	NA	NA	NA	0.559	1.61	1696	chr6B	95971631	94231	104	8.08e-37	159	NA	NA	NA	NA
TRINITY_DN7324_c0_g1_i15	544	2	NA	NA	NA	TRINITY_DN7324_c0_g1	1301	NA	NA	NA	jcf7180001560764	14945	80966	155107	94647	142151	213529	41295	78657	208786	39491	148.02	209413	33715	82.46	167531	28593	23059	200858	82349	73107	As548_TRINITY_DN3260_c2_g1	3.22e-66	NA	NA	NA	903205	414688	1742594	chr6B	117837347	87192	203	2.91e-58	231	chr6B	117772477	88.8	125
TRINITY_DN7354_c0_g1_i4	618	2	NA	NA	NA	TRINITY_DN7354_c0_g1	798	NA	NA	NA	NA	1355	0.397	3.73	0.83	0.335	5.86	5445	0.389	2389	1312	1464	5994	0.86	0.485	5451	2.3	1454	1589	5557	1281	As548_TRINITY_DN12142_c0_g1	1.42e-107	NA	NA	NA	24584	4249	24126	NA	NA	NA	NA	NA	NA	NA	NA	NA	NA
TRINITY_DN73569_c0_g1_i4	697	2	NA	NA	NA	TRINITY_DN73569_c0_g1	1025	NA	NA	NA	jcf7180001891256	0.556	0.963	0.023	0	0.618	0.961	0	0	0.623	0	0.323	0.043	0.283	0.363	0.595	0.531	0.73	0	0	0	As548_TRINITY_DN7367_c0_g1	4.34e-44	NA	NA	NA	0.4	0.545	0.501	chr6B	63985976	96296	189	2.85e-82	311	chr6B	63985672	95161	124
TRINITY_DN7356_c0_g1_i2	850	2	NA	NA	NA	TRINITY_DN7356_c0_g1	1431	NA	NA	NA	NA	0.569	1.06	0.973	0	0.375	0.713	0	0	0.841	0.51	0.162	0.512	0.313	0.772	0.835	0.832	0.464	0.693	0	0	As548_TRINITY_DN3437_c0_g1	1.46e-149	NA	NA	NA	14045	8726	13.69	NA	NA	NA	NA	NA	NA	NA	NA	NA	NA
TRINITY_DN73708_c0_g1_i1	1155	2	NA	NA	NA	TRINITY_DN73708_c0_g1	1639	NA	NA	NA	NA	0	0	0.486	0	0	0.062	0	0	0	0	0	0.075	0	0	0.269	0.291	0.084	0	0	0	As548_TRINITY_DN42788_c0_g1	0	NA	NA	NA	3307	0.308	3.38	NA	NA	NA	NA	NA	NA	NA	NA	NA	NA
TRINITY_DN7392_c0_g1_i23	4668	2	NA	NA	NA	TRINITY_DN7392_c0_g1	5330	NA	NA	NA	NA	0	0.313	0	0.229	0.801	1416	0	0.69	0.82	0.781	0.413	1.29	0	0.379	1017	0	0.632	0.346	0	0.901	As548_TRINITY_DN33082_c0_g1	0	NA	NA	NA	3636	3052	5.61	chr6S	268031866	85.65	223	1.57e-56	228	chr6S	268031650	85.65	223
TRINITY_DN740_c0_g1_i3	4416	2	NA	NA	NA	TRINITY_DN740_c0_g1	4591	NA	NA	NA	NA	0.108	0.542	2386	0.505	0	1478	0.323	0	1184	0.531	0.548	1365	0.567	0.333	1881	0.541	1138	1009	0.15	0	As548_TRINITY_DN13226_c0_g2	0	NA	NA	NA	2467	0.941	5041	NA	NA	NA	NA	NA	NA	NA	NA	NA	NA
TRINITY_DN7411_c0_g1_i1	1900	2	NA	NA	NA	TRINITY_DN7411_c0_g1	2116	NA	NA	NA	NA	0.501	5456	0.336	0.217	4075	0	0.568	3007	0.093	0	4777	0.128	0.469	10971	0.278	0	1889	0.825	0.043	1012	As548_TRINITY_DN7234_c0_g3	8.15e-119	NA	NA	NA	0.15	1188	0.58	chr6S	234800548	82558	516	4.39e-118	431	chr6S	758798729	94203	69
TRINITY_DN7434_c0_g1_i15	5072	2	NA	NA	NA	TRINITY_DN7434_c0_g1	5220	NA	NA	NA	jcf7180001890609	0.542	1.65	0.452	0	1358	0.599	0.255	2485	0.499	0	0.449	0.427	1153	1635	0.25	0.895	2578	0.622	0.269	1004	As548_TRINITY_DN366_c0_g2	0	NA	NA	NA	4286	3501	2219	chr6B	547719436	91096	146	4.33e-47	196	chr6B	547719292	91096	146
TRINITY_DN7457_c0_g1_i8	2564	2	NA	NA	NA	TRINITY_DN7457_c0_g1	3153	NA	NA	NA	NA	0	0.855	0.243	0	0.193	0.331	0.578	0.61	0.291	0	0.602	0.107	0.225	0.75	0.384	0.052	1686	0.795	0	1241	As548_TRINITY_DN20886_c0_g1	5.44e-147	NA	NA	NA	0	1249	1275	NA	NA	NA	NA	NA	NA	NA	NA	NA	NA
TRINITY_DN7502_c0_g1_i2	1636	2	NA	NA	NA	TRINITY_DN7502_c0_g1	2193	NA	NA	NA	NA	0	0.397	2815	0	2696	3504	0	2176	4196	1279	0.431	3007	1339	1.9	3982	1883	2.55	2394	1	1036	As548_TRINITY_DN6248_c1_g2	0	NA	NA	NA	21647	2032	22.92	NA	NA	NA	NA	NA	NA	NA	NA	NA	NA
TRINITY_DN7509_c0_g1_i4	1713	2	NA	NA	NA	TRINITY_DN7509_c0_g1	2036	NA	NA	NA	NA	1748	0.975	2861	0.554	1034	2408	0	1866	1776	0.651	1033	2.89	1378	1688	2649	1051	1861	1518	0.279	1502	As548_TRINITY_DN7793_c0_g2	0	NA	NA	NA	3217	2102	2.97	NA	NA	NA	NA	NA	NA	NA	NA	NA	NA
TRINITY_DN7514_c0_g1_i3	2061	2	NA	NA	NA	TRINITY_DN7514_c0_g1	3242	NA	NA	NA	jcf7180001678569	2981	7792	4471	3.55	8464	4.01	1273	6314	5982	0.792	7192	4586	3998	8571	4961	6274	8204	2822	3439	8071	As548_TRINITY_DN27533_c0_g1	0	NA	NA	NA	23555	26618	17833	NA	NA	NA	NA	NA	NA	NA	NA	NA	NA
TRINITY_DN7533_c0_g2_i10	4308	2	NA	NA	NA	TRINITY_DN7533_c0_g2	5059	NA	NA	NA	NA	1423	2541	1819	2311	4947	1116	0	5474	1454	1995	2307	1141	2307	3.74	1708	2872	5106	1162	1.87	5676	As548_TRINITY_DN2299_c0_g3	0	NA	NA	NA	1169	10001	5258	NA	NA	NA	NA	NA	NA	NA	NA	NA	NA
TRINITY_DN7535_c0_g1_i3	1873	2	NA	NA	NA	TRINITY_DN7535_c0_g1	2318	NA	NA	NA	jcf7180001939294	0.176	0	0.776	0.53	0	1054	0	0.159	0.602	0.542	0.817	1045	0.323	0.31	1123	0.26	0.435	0.132	0.247	0.957	As548_TRINITY_DN100258_c0_g1	0	NA	NA	NA	4535	5762	5679	chr6B	520243101	86.55	171	1.49e-43	183	chr6B	520243141	85496	131
TRINITY_DN75427_c0_g1_i1	250	2	NA	NA	NA	TRINITY_DN75427_c0_g1	250	NA	NA	NA	NA	0	0	6776	0	0	0	0	0	0	0	0	0	0	0	0	0	0	0	0	0	As548_TRINITY_DN4606_c0_g1	4.15e-113	NA	NA	NA	3486	2269	3505	NA	NA	NA	NA	NA	NA	NA	NA	NA	NA
TRINITY_DN758_c0_g1_i2	2657	2	NA	NA	NA	TRINITY_DN758_c0_g1	3097	NA	NA	NA	NA	0.948	0.638	1726	2527	1277	2108	6453	3025	2223	3.22	2451	1909	4477	3384	1324	4089	2093	1528	4697	1312	As548_TRINITY_DN1428_c0_g1	0	NA	NA	NA	26183	15921	14385	NA	NA	NA	NA	NA	NA	NA	NA	NA	NA
TRINITY_DN7594_c0_g1_i1	2648	2	NA	NA	NA	TRINITY_DN7594_c0_g1	3330	NA	NA	NA	jcf7180001714058	1084	1	1297	0.59	0.852	1716	0.48	1052	1007	0.954	1203	1546	1906	1893	1555	2102	1412	0.53	0.537	0.395	As548_TRINITY_DN15119_c0_g1	0	NA	NA	NA	2108	1548	0.592	chr6S	35765263	96296	81	2.19e-28	134	NA	NA	NA	NA
TRINITY_DN7595_c0_g1_i1	1646	2	NA	NA	NA	TRINITY_DN7595_c0_g1	2078	NA	NA	NA	NA	0.176	0.626	0.985	0.662	0.831	1271	0	0.336	1194	2.57	0.305	0.875	1202	0	0.806	1436	0.836	0	0.785	0.632	As548_TRINITY_DN12797_c0_g1	0	NA	NA	NA	2777	2507	3664	NA	NA	NA	NA	NA	NA	NA	NA	NA	NA
TRINITY_DN7614_c0_g1_i6	5387	2	NA	NA	NA	TRINITY_DN7614_c0_g1	6439	NA	NA	NA	jcf7180001704516	0.434	0.506	0.324	0.168	0	0.424	0	0.416	0.831	0	0.449	0.267	0.518	0.825	0.25	0.343	0.688	0.285	0	0	As548_TRINITY_DN3345_c0_g1	0	NA	NA	NA	4975	4917	1798	NA	NA	NA	NA	NA	NA	NA	NA	NA	NA
TRINITY_DN7644_c0_g1_i47	3680	2	NA	NA	NA	TRINITY_DN7644_c0_g1	10142	NA	NA	NA	NA	0	0	0.811	0	0	0.765	0	0.283	0.872	0.065	0	1568	0.117	0	0.816	0.229	0	0.255	0.064	0.063	As548_TRINITY_DN2955_c0_g1	5.05e-122	NA	NA	NA	4485	5929	6737	chr6S	74881348	81.25	224	3.96e-40	174	chr6S	74881568	81043	211
TRINITY_DN7670_c0_g1_i9	3263	2	NA	NA	NA	TRINITY_DN7670_c0_g1	7582	NA	NA	NA	jcf7180001908472	0.854	1782	1819	0.205	0.527	2429	0.206	0.831	0.769	0.423	1194	0.832	0.86	1969	1823	1946	1.32	1681	0	0.798	As548_TRINITY_DN11743_c0_g1	0	NA	NA	NA	2378	2208	3118	NA	NA	NA	NA	NA	NA	NA	NA	NA	NA
TRINITY_DN7673_c0_g1_i6	1749	2	NA	NA	NA	TRINITY_DN7673_c0_g1	3142	NA	NA	NA	NA	0.976	1385	1135	1697	1004	1.55	0	1866	1797	1692	0.97	1472	1222	1552	1.18	1727	2795	0.489	0.043	0.664	As548_TRINITY_DN8733_c0_g1	0	NA	NA	NA	7612	8964	5474	NA	NA	NA	NA	NA	NA	NA	NA	NA	NA
TRINITY_DN7688_c0_g1_i21	4048	2	NA	NA	NA	TRINITY_DN7688_c0_g1	7239	NA	NA	NA	NA	0	0.506	0.718	0.313	0.659	0.94	0	0	0.758	0.39	0	1333	1261	0.795	0.461	1082	0.997	0.163	0	0	As548_TRINITY_DN7165_c0_g1	0	NA	NA	NA	4665	3941	5622	NA	NA	NA	NA	NA	NA	NA	NA	NA	NA
TRINITY_DN7698_c0_g2_i2	1790	2	NA	NA	NA	TRINITY_DN7698_c0_g2	2086	NA	NA	NA	NA	0.257	0.409	0.869	0.277	0.466	1137	0	0.902	1267	0.325	0.323	1098	0.87	1264	1468	0.406	0.183	0.438	0	0.751	As548_TRINITY_DN5523_c0_g1	0	NA	NA	NA	3366	4715	8399	chr6S	313704533	97674	43	8.39e-11	75	NA	NA	NA	NA
TRINITY_DN76_c0_g1_i1	2471	2	NA	NA	NA	TRINITY_DN76_c0_g1	5571	NBSLRR	3509	5485	NA	0.203	0.409	0.568	0	1308	0.703	0	0.654	0.218	0	0	0.149	0.235	0.848	0.144	0.822	0.794	0	0.322	0	As548_TRINITY_DN16763_c1_g4	2.87e-97	NA	NA	NA	0	0.686	1229	chr6S	173273502	75148	676	1.23e-77	298	chr6S	173273996	76773	409
TRINITY_DN7701_c0_g1_i14	1574	2	NA	NA	NA	TRINITY_DN7701_c0_g1	3445	NA	NA	NA	NA	0.122	0.229	0.405	0	0	0.124	0	0.035	0.28	0	0.368	0.395	0.547	0.204	0.393	0.593	0.112	0.672	1204	0.174	As548_TRINITY_DN1604_c2_g2	2.2e-126	NA	NA	NA	4735	5401	1764	NA	NA	NA	NA	NA	NA	NA	NA	NA	NA
TRINITY_DN7707_c0_g2_i3	2139	2	NA	NA	NA	TRINITY_DN7707_c0_g2	2278	NA	NA	NA	NA	2832	4974	3799	0.746	4592	2057	1.89	4006	3.23	0.716	4238	1994	5.64	5027	2677	4079	6532	0.998	2171	6095	As548_TRINITY_DN7410_c0_g1	0	NA	NA	NA	6283	15209	5804	NA	NA	NA	NA	NA	NA	NA	NA	NA	NA
TRINITY_DN7709_c0_g1_i6	2624	2	NA	NA	NA	TRINITY_DN7709_c0_g1	3879	NA	NA	NA	jcf7180001527079	0.081	0.494	0.498	0	0.872	0.61	0	0.265	0.675	0	0.081	0.565	0.43	1037	0.422	0.177	0.737	0	0	0.68	As548_TRINITY_DN1007_c0_g2	0	NA	NA	NA	7652	6501	5462	chr6B	440982498	96525	259	2.91e-117	429	chr6B	69428894	84536	291
TRINITY_DN7715_c0_g1_i14	1853	2	NA	NA	NA	TRINITY_DN7715_c0_g1	2529	NA	NA	NA	jcf7180001585112	8347	12898	9903	2.66	9823	9963	9352	10825	9347	9629	1877	13395	9922	12902	12254	11581	11652	12532	7803	8047	As548_TRINITY_DN10540_c0_g1	0	NA	NA	NA	14265	11708	18334	NA	NA	NA	NA	NA	NA	NA	NA	NA	NA
TRINITY_DN7716_c0_g1_i16	1847	2	NA	NA	NA	TRINITY_DN7716_c0_g1	3970	NA	NA	NA	NA	0.352	0.12	0.405	0	1744	1344	0	0.398	1319	0	0.431	1002	0.645	0.515	0.393	0.468	1025	0.02	0	0.656	As548_TRINITY_DN14201_c0_g1	1.25e-84	NA	NA	NA	5404	1671	2572	NA	NA	NA	NA	NA	NA	NA	NA	NA	NA
TRINITY_DN77280_c0_g1_i17	1312	2	NA	NA	NA	TRINITY_DN77280_c0_g1	1603	NA	NA	NA	NA	0	0.783	0.347	0	0	0.734	0	0.097	0	0	0.584	0.896	0	0.81	0.605	0.271	1208	0	0	0.759	As548_TRINITY_DN27694_c0_g1	0	NA	NA	NA	2477	2.7	3243	NA	NA	NA	NA	NA	NA	NA	NA	NA	NA
TRINITY_DN7741_c0_g1_i5	1375	2	NA	NA	NA	TRINITY_DN7741_c0_g1	3051	NA	NA	NA	NA	0.285	1542	0.915	1456	0.598	1798	1342	2034	1392	0	2388	0.629	0.01	1454	1.42	0.687	2557	0.591	0.129	2648	As548_TRINITY_DN7280_c0_g1	0	NA	NA	NA	4445	4002	4085	NA	NA	NA	NA	NA	NA	NA	NA	NA	NA
TRINITY_DN7754_c0_g1_i10	877	2	NA	NA	NA	TRINITY_DN7754_c0_g1	3112	NA	NA	NA	jcf7180001893410	0	0.831	0.127	0.518	0.335	0.341	0.92	0.84	0.685	0	0	0.405	0.117	0.545	0.365	0.635	0.288	0	0	0	As548_TRINITY_DN3419_c0_g1	0	NA	NA	NA	1598	2991	4177	chr6B	422647882	93968	630	0	926	chr6B	422650674	96325	517
TRINITY_DN77823_c0_g1_i2	701	2	NA	NA	NA	TRINITY_DN77823_c0_g1	701	NBSLRR	41	595	jcf7180001592290	0	0.253	0.521	0	0	0.672	0	0	0.042	0.618	0	0.821	0.401	0.863	0.912	0.874	0.133	0.876	0	0	As548_TRINITY_DN10274_c0_g8	0	NBSLRR	72	1343	0.38	0	1104	chr6S	796038677	80676	621	2.99e-130	470	chr6S	795903424	80072	557
TRINITY_DN7803_c0_g1_i3	3186	2	NA	NA	NA	TRINITY_DN7803_c0_g1	4548	NA	NA	NA	NA	1572	4323	1761	1926	3386	2811	2732	3175	1932	1149	3753	3061	3157	3437	1852	4401	3821	1284	1494	0.933	As548_TRINITY_DN6803_c0_g1	0	NA	NA	NA	13036	13881	10527	NA	NA	NA	NA	NA	NA	NA	NA	NA	NA
TRINITY_DN78154_c0_g1_i3	2928	2	NA	NA	NA	TRINITY_DN78154_c0_g1	3631	NA	NA	NA	NA	0.163	0	0.347	0	0.091	0.424	0	0	1205	0	0.215	0.651	0.332	0	0.173	0.156	0	0.377	0	0	As548_TRINITY_DN11107_c0_g1	0	NA	NA	NA	0.589	1328	2435	NA	NA	NA	NA	NA	NA	NA	NA	NA	NA
TRINITY_DN7818_c1_g1_i1	11541	2	NA	NA	NA	TRINITY_DN7818_c1_g1	11815	NA	NA	NA	NA	0.325	0.602	0.66	0.084	0.852	0.351	0	0	0.125	1063	1455	0	0	0.53	0.969	1561	0.274	0	0.021	0.071	As548_TRINITY_DN4854_c0_g1	0	NA	NA	NA	5075	2806	6441	NA	NA	NA	NA	NA	NA	NA	NA	NA	NA
TRINITY_DN7818_c1_g1_i2	11540	2	NA	NA	NA	TRINITY_DN7818_c1_g1	11815	NA	NA	NA	NA	0.542	0.879	0.266	0.156	0	1251	0	0.539	0.644	0	0	1.28	1349	0.409	1008	0.864	1391	0	0.548	0.134	As548_TRINITY_DN4854_c0_g1	0	NA	NA	NA	5075	2806	6441	NA	NA	NA	NA	NA	NA	NA	NA	NA	NA
TRINITY_DN7830_c0_g1_i5	4057	2	NA	NA	NA	TRINITY_DN7830_c0_g1	5215	NBSLRR	2177	4936	NA	0.23	0.975	0.649	0	0.922	0.362	0.196	0.531	0.654	0.466	0.781	0.299	1427	1015	0.413	1186	1004	0	0	0	As548_TRINITY_DN8176_c0_g1	0	NBSLRR	409	2951	0.789	1319	1263	NA	NA	NA	NA	NA	NA	NA	NA	NA	NA
TRINITY_DN7841_c0_g1_i1	6069	2	NA	NA	NA	TRINITY_DN7841_c0_g1	6565	NA	NA	NA	jcf7180001521519	0	1084	0.232	0.349	0	1075	0	0.221	0.083	0.889	1212	0.501	0.411	0.803	0.297	0.198	0.815	0	0	0	As548_TRINITY_DN11242_c0_g1	0	NA	NA	NA	7642	7.38	7.83	chr6S	495232347	97797	817	0	1397	chr6S	495231533	97739	752
TRINITY_DN7841_c0_g1_i23	1812	2	NA	NA	NA	TRINITY_DN7841_c0_g1	6565	NA	NA	NA	jcf7180001521519	0	0.024	0	0	0	0.103	0	0.018	0.53	0	0.296	0.192	0.811	0	0.134	0.208	0.288	0.01	0.58	0	As548_TRINITY_DN11242_c0_g1	0	NA	NA	NA	7642	7.38	7.83	chr6S	495232347	97797	817	0	1397	chr6S	495231533	97739	752
TRINITY_DN7841_c0_g1_i28	2949	2	NA	NA	NA	TRINITY_DN7841_c0_g1	6565	NA	NA	NA	jcf7180001521519	0.379	0.59	0	0	0.223	0.176	0	0	0.914	0.954	0	0	0.411	0	0.182	0.094	0.232	0	0.129	0	As548_TRINITY_DN11242_c0_g1	0	NA	NA	NA	7642	7.38	7.83	chr6S	495232347	97797	817	0	1397	chr6S	495231533	97739	752
TRINITY_DN7859_c0_g2_i2	2032	2	NA	NA	NA	TRINITY_DN7859_c0_g2	2301	NA	NA	NA	jcf7180001922125	0.732	0.891	0.417	0	0.487	0.527	0	0.628	0.613	0.141	0.584	0.875	1554	0.734	0.614	0.479	0.583	0	0.72	0.435	As548_TRINITY_DN17938_c0_g4	5.34e-116	NA	NA	NA	14924	0	3926	chr6B	279176791	87379	103	1.52e-23	117	NA	NA	NA	NA
TRINITY_DN785_c1_g1_i4	2971	2	NA	NA	NA	TRINITY_DN785_c1_g1	4687	NA	NA	NA	NA	0.352	1036	0.544	0.71	0.345	1478	0.294	0	0.488	0.358	0	1173	0.371	0.606	1152	0.364	0.204	1.63	0.183	0.569	As548_TRINITY_DN7721_c0_g1	0	NA	NA	NA	3037	4732	4859	NA	NA	NA	NA	NA	NA	NA	NA	NA	NA
TRINITY_DN788_c0_g1_i8	3680	2	NA	NA	NA	TRINITY_DN788_c0_g1	5154	NA	NA	NA	NA	0.257	5817	6486	0	4521	1064	0	5687	2773	0.933	5306	2421	1241	0.712	3.33	2289	6167	2731	0.43	0.767	As548_TRINITY_DN2_c3_g1	0	NA	NA	NA	150682	315069	190607	NA	NA	NA	NA	NA	NA	NA	NA	NA	NA
TRINITY_DN7894_c0_g1_i15	6216	2	NA	NA	NA	TRINITY_DN7894_c0_g1	6400	NA	NA	NA	jcf7180001620985	0.556	0.638	0.579	0	0.405	0.672	0	0	1007	0.043	0.386	0.555	0.166	0.386	0.365	0.697	0.913	0	0	0	As548_TRINITY_DN9310_c0_g1	0	NA	NA	NA	2617	4046	3573	NA	NA	NA	NA	NA	NA	NA	NA	NA	NA
TRINITY_DN7894_c0_g1_i22	6212	2	NA	NA	NA	TRINITY_DN7894_c0_g1	6400	NA	NA	NA	jcf7180001620985	0	0.373	0.151	0.722	0.446	0.558	0	0	0.571	0.781	0.368	0.587	0.469	0.916	0.912	0.791	0.421	0	0	0	As548_TRINITY_DN9310_c0_g1	0	NA	NA	NA	2617	4046	3573	NA	NA	NA	NA	NA	NA	NA	NA	NA	NA
TRINITY_DN7897_c1_g1_i2	291	2	NA	NA	NA	TRINITY_DN7897_c1_g1	832	NA	NA	NA	jcf7180001936183	0	2939	0	0	4217	0.94	0	0	0.478	0	0	0	0	0	0	0	0	0	0	0	As548_TRINITY_DN33327_c0_g1	1.17e-93	NA	NA	NA	2108	2234	4097	chr6B	665131218	95252	337	1.25e-149	534	chr6B	665424559	94955	337
TRINITY_DN7930_c0_g1_i11	1507	2	NA	NA	NA	TRINITY_DN7930_c0_g1	3201	NA	NA	NA	NA	0.027	0	0.429	0	0.375	0	0	0	0.28	0	0	0.043	0	0	0	0	0	0	0	0	As548_TRINITY_DN826_c0_g1	1.27e-98	NA	NA	NA	17552	21173	25014	NA	NA	NA	NA	NA	NA	NA	NA	NA	NA
TRINITY_DN7939_c0_g2_i10	1108	2	NA	NA	NA	TRINITY_DN7939_c0_g2	1644	NA	NA	NA	NA	0.881	0.349	1494	0	1135	1282	0	0.964	1142	0	0	0.917	1046	0.439	2.15	0.853	0.232	0	0.838	2522	As548_TRINITY_DN4036_c0_g1	0	NA	NA	NA	10289	14549	21349	NA	NA	NA	NA	NA	NA	NA	NA	NA	NA
TRINITY_DN7960_c0_g1_i1	3769	2	NA	NA	NA	TRINITY_DN7960_c0_g1	4091	NA	NA	NA	NA	0	2168	0	0	0	0.072	0	0.327	0	0	0	0.331	0.469	0.969	0	0.624	1517	0	0	0.04	As548_TRINITY_DN246_c2_g1	0	NA	NA	NA	1438	1953	1343	chr6S	89697634	91.88	234	8.97e-83	315	chr6S	86580204	92727	110
TRINITY_DN7960_c0_g1_i13	3769	2	NA	NA	NA	TRINITY_DN7960_c0_g1	4091	NA	NA	NA	NA	0	0	0.371	0.012	0.182	0.31	0	0.743	0.571	0	1535	0.139	0.381	1121	0.729	0	1096	0	0	0.822	As548_TRINITY_DN246_c2_g1	0	NA	NA	NA	1438	1953	1343	chr6S	89697634	91.88	234	8.97e-83	315	chr6S	86580204	92727	110
TRINITY_DN8015_c0_g1_i9	5412	2	NA	NA	NA	TRINITY_DN8015_c0_g1	6549	NA	NA	NA	jcf7180001901288	0.068	0	0.313	0	0.223	0.176	0	0	0.031	0	0	0.213	0.381	0.068	0.259	0	0.906	0	0	0	As548_TRINITY_DN4265_c0_g1	0	NA	NA	NA	2527	1645	2583	chr6B	291771467	92564	1049	0	1443	chr6B	455136939	91512	860
TRINITY_DN8021_c0_g1_i2	2112	2	NA	NA	NA	TRINITY_DN8021_c0_g1	2276	NA	NA	NA	jcf7180001895363	2791	1855	4413	1336	0.558	1095	2713	0.425	4175	1995	1284	4906	1.76	0.568	6497	2227	1.44	2364	1139	1265	As548_TRINITY_DN91125_c0_g1	0	NA	NA	NA	7912	4891	10686	chr6S	189016818	99234	261	2.78e-130	472	chr6S	189021555	86747	415
TRINITY_DN802_c2_g1_i8	333	2	NA	NA	NA	TRINITY_DN802_c2_g1	911	NA	NA	NA	NA	0	2.3	0.429	4056	0	0.63	0	0	0	0	0	0.213	0.205	0.432	2169	0.219	0	0	4213	0	As548_TRINITY_DN3457_c0_g2	7.07e-156	NA	NA	NA	34784	32511	62762	NA	NA	NA	NA	NA	NA	NA	NA	NA	NA
TRINITY_DN8071_c0_g1_i2	2938	2	NA	NA	NA	TRINITY_DN8071_c0_g1	3050	NA	NA	NA	NA	0	2589	3116	0.746	2027	3855	1381	1088	4653	1.16	2281	5183	1.76	2665	3464	1758	2.43	0.754	0.494	1881	As548_TRINITY_DN7300_c0_g1	0	NA	NA	NA	1189	1267	2777	NA	NA	NA	NA	NA	NA	NA	NA	NA	NA
TRINITY_DN8093_c0_g1_i69	3476	2	NA	NA	NA	TRINITY_DN8093_c0_g1	5396	NA	NA	NA	jcf7180001927153	0	0.614	0	0	0	0	0	0	0.125	0	0	0	0	0	0	0	0	0	0	0	As548_TRINITY_DN1225_c2_g1	0	NA	NA	NA	3536	2006	1764	chr6B	288801453	96269	536	0	874	chr6B	259712508	92913	508
TRINITY_DN80978_c0_g1_i1	470	2	NA	NA	NA	TRINITY_DN80978_c0_g1	542	NA	NA	NA	jcf7180001705472	0	0	1656	0	0.72	1933	0	0	0.81	1551	0	1.44	2.18	1068	1814	1758	0.26	2527	0	0	As548_TRINITY_DN6810_c0_g1	0	NA	NA	NA	1079	1601	2458	chr6B	682857455	87879	99	3.43e-24	117	NA	NA	NA	NA
TRINITY_DN8112_c0_g1_i8	2817	2	NA	NA	NA	TRINITY_DN8112_c0_g1	3646	NA	NA	NA	NA	1192	1794	3023	1625	0.882	3307	1439	0.513	3573	1637	0.521	3157	2796	1295	3416	2029	0.499	0.499	0.258	0.704	As548_TRINITY_DN5699_c0_g1	0	NA	NA	NA	14785	10608	14555	NA	NA	NA	NA	NA	NA	NA	NA	NA	NA
TRINITY_DN8113_c0_g1_i4	306	2	NA	NA	NA	TRINITY_DN8113_c0_g1	1182	NA	NA	NA	NA	0	3553	0	23409	0	0	14571	2918	0	4793	0	2165	0	2271	0	0	5191	17779	7083	4166	As548_TRINITY_DN16198_c0_g1	3.69e-80	NA	NA	NA	1638	0	1024	chr6B	716684738	92437	119	2.1e-39	169	chr6B	151231313	90756	119
TRINITY_DN8118_c0_g1_i3	3329	2	NA	NA	NA	TRINITY_DN8118_c0_g1	5678	NA	NA	NA	NA	0.406	0.566	0.127	0	0.71	0.32	0	0.531	0.021	0.434	0.413	0.416	0.538	1022	0.489	0.395	0.688	0.774	0	0.15	As548_TRINITY_DN5089_c0_g1	0	NA	NA	NA	4985	4451	1923	NA	NA	NA	NA	NA	NA	NA	NA	NA	NA
TRINITY_DN8118_c0_g1_i4	5373	2	NA	NA	NA	TRINITY_DN8118_c0_g1	5678	NA	NA	NA	NA	0.176	0.711	0.266	0	0.608	0.279	0.304	0	0.415	0	0.637	0.277	0.235	0	0.921	0.479	0.351	0.316	0	0.443	As548_TRINITY_DN5089_c0_g1	0	NA	NA	NA	4985	4451	1923	NA	NA	NA	NA	NA	NA	NA	NA	NA	NA
TRINITY_DN8122_c0_g1_i5	5174	2	NA	NA	NA	TRINITY_DN8122_c0_g1	5337	NA	NA	NA	NA	0	0.686	0.51	0	0.02	0.641	0	0.416	0.55	0.26	0.296	0.608	0.411	0.159	0.461	0.114	0.295	0.693	0	0	As548_TRINITY_DN17279_c0_g2	0	NA	NA	NA	1658	3967	3767	NA	NA	NA	NA	NA	NA	NA	NA	NA	NA
TRINITY_DN8124_c0_g1_i11	8308	2	NA	NA	NA	TRINITY_DN8124_c0_g1	10095	NA	NA	NA	NA	0	0.253	0.359	0	0	0.589	0	0.088	0.312	0	0.7	0.693	0.254	0	0.653	0.583	0.112	1.1	0.204	0	As548_TRINITY_DN2790_c0_g1	0	NA	NA	NA	2967	4416	3824	NA	NA	NA	NA	NA	NA	NA	NA	NA	NA
TRINITY_DN8124_c0_g1_i2	8314	2	NA	NA	NA	TRINITY_DN8124_c0_g1	10095	NA	NA	NA	NA	0.691	0.807	1089	0	0.75	1705	0	0.035	1049	0	0	1077	0.753	0.78	1468	0.739	0.555	0.662	0	0	As548_TRINITY_DN2790_c0_g1	0	NA	NA	NA	2967	4416	3824	NA	NA	NA	NA	NA	NA	NA	NA	NA	NA
TRINITY_DN8141_c0_g1_i16	3333	2	NA	NA	NA	TRINITY_DN8141_c0_g1	4273	NA	NA	NA	NA	0.217	1855	0.822	0	1186	0.641	0	0.354	1007	0.477	1275	0.992	1114	1931	0.681	0.874	1896	0.734	0.161	0.538	As548_TRINITY_DN7692_c0_g1	0	NA	NA	NA	3456	5304	2344	NA	NA	NA	NA	NA	NA	NA	NA	NA	NA
TRINITY_DN8143_c0_g1_i9	2750	2	NA	NA	NA	TRINITY_DN8143_c0_g1	3316	NA	NA	NA	NA	0.122	0.867	0.498	0.205	0	0.341	0	0	0.499	0.033	0	0.064	0.596	0.159	0.058	0	0.295	0	0	0	As548_TRINITY_DN5778_c0_g1	0	NA	NA	NA	3037	3202	4051	NA	NA	NA	NA	NA	NA	NA	NA	NA	NA
TRINITY_DN8187_c0_g1_i7	1776	2	NA	NA	NA	TRINITY_DN8187_c0_g1	2301	NA	NA	NA	NA	0	1024	1946	0.265	1287	0.713	0	0.318	0.852	0	0.485	0.341	1339	0	1881	1332	0.78	1386	0	0.514	As548_TRINITY_DN5797_c0_g1	0	NA	NA	NA	4425	3.87	5132	NA	NA	NA	NA	NA	NA	NA	NA	NA	NA
TRINITY_DN8191_c0_g1_i7	1635	2	NA	NA	NA	TRINITY_DN8191_c0_g1	1804	NA	NA	NA	NA	2629	4432	2108	1095	2798	0.331	5.64	6704	0.312	1.67	10828	0.651	1.73	4808	1046	1.54	2557	0	1924	8443	As548_TRINITY_DN12150_c0_g1	0	NA	NA	NA	2228	6439	3323	NA	NA	NA	NA	NA	NA	NA	NA	NA	NA
TRINITY_DN8247_c0_g1_i11	1962	2	NA	NA	NA	TRINITY_DN8247_c0_g1	3130	NA	NA	NA	NA	0.393	0.084	0.73	1781	0.405	0.971	0	0.124	0.8	0	0.171	1141	0.225	0.28	1065	0.447	0.232	0	0	0.901	As548_TRINITY_DN9847_c0_g1	0	NA	NA	NA	0.42	0.317	3266	NA	NA	NA	NA	NA	NA	NA	NA	NA	NA
TRINITY_DN8253_c0_g1_i2	2352	2	NA	NA	NA	TRINITY_DN8253_c0_g1	2567	NA	NA	NA	jcf7180001630319	0.664	0.747	1228	0	0.487	1199	0	0	1059	0	0.934	1077	0.274	0.273	0.624	0.999	0.576	0	0	0	As548_TRINITY_DN25211_c0_g1	0	NA	NA	NA	0.559	0.202	1844	NA	NA	NA	NA	NA	NA	NA	NA	NA	NA
TRINITY_DN8263_c0_g1_i25	2536	2	NA	NA	NA	TRINITY_DN8263_c0_g1	3125	NA	NA	NA	NA	0	0	0.22	0	0	0.072	0	0	0	0	0	0.064	0.196	0	0.297	0.229	0	0	0	0	As548_TRINITY_DN3934_c0_g3	0	NA	NA	NA	8741	11.4	6601	NA	NA	NA	NA	NA	NA	NA	NA	NA	NA
TRINITY_DN8276_c0_g1_i10	391	2	NA	NA	NA	TRINITY_DN8276_c0_g1	2495	NA	NA	NA	NA	0	0	1911	0	0	0.982	0	0	2358	0	0	0.875	2033	0	1459	0.988	0	0	0	0	As548_TRINITY_DN23452_c1_g1	0	NA	NA	NA	6443	2.19	10515	NA	NA	NA	NA	NA	NA	NA	NA	NA	NA
TRINITY_DN827_c0_g1_i7	1542	2	NA	NA	NA	TRINITY_DN827_c0_g1	4573	NA	NA	NA	NA	8333	5046	11.56	8.75	6964	20525	5944	5492	14083	8013	5208	14.44	8534	6.33	15728	6503	5738	10087	6341	4727	As548_TRINITY_DN80_c0_g1	2.12e-172	NA	NA	NA	252296	46155	94774	NA	NA	NA	NA	NA	NA	NA	NA	NA	NA
TRINITY_DN83366_c0_g2_i1	272	2	NA	NA	NA	TRINITY_DN83366_c0_g2	272	NA	NA	NA	NA	0	0	0.672	0	0	4279	0	0	0	0	0	1813	0	0	2015	0	0	0	0	0	As548_TRINITY_DN103496_c0_g1	3.78e-64	NA	NA	NA	0	0	4837	NA	NA	NA	NA	NA	NA	NA	NA	NA	NA
TRINITY_DN8337_c0_g1_i3	1546	2	NA	NA	NA	TRINITY_DN8337_c0_g1	3188	NA	NA	NA	NA	5772	7491	5.56	3611	7805	3638	0.95	10082	5.12	5075	9921	4426	8954	11902	4529	8719	11084	6612	6384	4427	As548_TRINITY_DN1242_c0_g1	0	NA	NA	NA	8072	17135	6601	NA	NA	NA	NA	NA	NA	NA	NA	NA	NA
TRINITY_DN83456_c0_g1_i1	751	2	NA	NA	NA	TRINITY_DN83456_c0_g1	751	NA	NA	NA	NA	0	0.47	0.498	1023	0.76	0.465	0	0	0.779	0.9	1634	0.363	0.626	0.704	0.653	0.437	0.119	0.662	1752	0.909	As548_TRINITY_DN14606_c0_g1	0	NA	NA	NA	1219	1583	2435	NA	NA	NA	NA	NA	NA	NA	NA	NA	NA
TRINITY_DN8366_c0_g1_i2	2892	2	NA	NA	NA	TRINITY_DN8366_c0_g1	3857	NA	NA	NA	jcf7180001771852	0.068	0	0.405	0.53	0.882	0.744	0.764	0.035	1361	1507	0	0.672	0	0	0	0.843	0.091	0.937	0	0	As548_TRINITY_DN1613_c0_g1	0	NA	NA	NA	2118	1.02	4814	NA	NA	NA	NA	NA	NA	NA	NA	NA	NA
TRINITY_DN8392_c0_g1_i17	2096	2	NA	NA	NA	TRINITY_DN8392_c0_g1	3320	NA	NA	NA	NA	0	0.578	0.602	0.096	0.608	0.248	0.48	0	0.083	0	0	0.757	0.117	0.719	1027	0.728	0	0.438	0.258	0	As548_TRINITY_DN5591_c0_g2	0	NA	NA	NA	1598	0.607	1935	NA	NA	NA	NA	NA	NA	NA	NA	NA	NA
TRINITY_DN8407_c0_g1_i3	671	2	NA	NA	NA	TRINITY_DN8407_c0_g1	909	NA	NA	NA	NA	0.867	1072	6139	0	0.324	1116	1528	0	2.16	1.67	0	0.64	0	0.538	10278	0.864	0.878	4656	1139	1628	As548_TRINITY_DN5678_c0_g1	1.05e-54	NA	NA	NA	2338	16546	8182	NA	NA	NA	NA	NA	NA	NA	NA	NA	NA
TRINITY_DN840_c0_g1_i2	1746	2	NA	NA	NA	TRINITY_DN840_c0_g1	1841	NA	NA	NA	jcf7180001570641	3347	9201	8143	3502	4237	16815	0.695	10427	21613	2993	8727	14387	6.97	9.85	12475	4016	13682	17402	0.989	10127	As548_TRINITY_DN2290_c0_g3	0	NA	NA	NA	5225	8365	12.45	NA	NA	NA	NA	NA	NA	NA	NA	NA	NA
TRINITY_DN8415_c1_g1_i10	2753	2	NA	NA	NA	TRINITY_DN8415_c1_g1	4469	NA	NA	NA	NA	0	0.674	0.695	0.77	1044	0.682	0	0.955	0.737	0.802	1607	1034	0.039	0.863	0.739	0.333	0.492	0	0	0.656	As548_TRINITY_DN2210_c0_g1	0	NA	NA	NA	1508	5507	3562	NA	NA	NA	NA	NA	NA	NA	NA	NA	NA
TRINITY_DN8415_c1_g1_i6	4087	2	NA	NA	NA	TRINITY_DN8415_c1_g1	4469	NA	NA	NA	NA	0.745	1048	1888	0	1216	1984	0	1928	2088	1117	1553	3007	0.958	2075	1.91	2591	2037	0.581	0.398	0	As548_TRINITY_DN2210_c0_g1	0	NA	NA	NA	1508	5507	3562	NA	NA	NA	NA	NA	NA	NA	NA	NA	NA
TRINITY_DN8418_c0_g1_i7	739	2	NA	NA	NA	TRINITY_DN8418_c0_g1	2037	NA	NA	NA	jcf7180001890071	0	0	2282	0	0.547	2.46	2321	1778	0.966	2093	0.584	2698	2493	1787	3.56	1332	0.527	0.785	0.602	0	As548_TRINITY_DN482_c0_g3	0	NA	NA	NA	4505	2094	4.29	chr6S	795443723	92.33	352	1.91e-136	492	chr6S	795442504	97884	189
TRINITY_DN8431_c0_g1_i2	1223	2	NA	NA	NA	TRINITY_DN8431_c0_g1	2502	NA	NA	NA	NA	0.786	1156	1031	0	1186	0.899	0.803	1212	1329	1052	1903	1269	0.459	1128	1411	0.864	1833	1355	0.838	0.522	As548_TRINITY_DN6849_c0_g1	0	NA	NA	NA	4106	5225	5679	NA	NA	NA	NA	NA	NA	NA	NA	NA	NA
TRINITY_DN8486_c0_g1_i1	1357	2	NA	NA	NA	TRINITY_DN8486_c0_g1	1530	NA	NA	NA	NA	0	0.217	0.95	0	0.426	0.506	0	0.027	0.384	0.878	0.278	0.437	0.499	0	0.528	2091	0.147	0	0	1115	As548_TRINITY_DN670_c1_g1	0	NA	NA	NA	2777	1786	3141	NA	NA	NA	NA	NA	NA	NA	NA	NA	NA
TRINITY_DN8505_c0_g1_i3	1713	2	NA	NA	NA	TRINITY_DN8505_c0_g1	2273	NA	NA	NA	NA	0.054	0.458	0	0	1429	0.155	2056	1.38	0	0.954	1077	0.875	0.391	1386	0	0	0.723	0	0.946	0	As548_TRINITY_DN192_c0_g1	0	NA	NA	NA	4935	8937	4.7	NA	NA	NA	NA	NA	NA	NA	NA	NA	NA
TRINITY_DN8507_c0_g1_i6	2952	2	NA	NA	NA	TRINITY_DN8507_c0_g1	3499	NA	NA	NA	jcf7180001742699	0.014	0	0.22	0	0	1085	0.999	0.398	0.239	0	0.431	0.97	0.85	0.538	0.633	0.978	0.253	0	0.58	0.126	As548_TRINITY_DN20607_c0_g1	0	NA	NA	NA	0.669	0.431	1559	chr6B	37931264	90206	194	1.69e-64	254	NA	NA	NA	NA
TRINITY_DN85250_c0_g1_i6	1225	2	NA	NA	NA	TRINITY_DN85250_c0_g1	1605	NA	NA	NA	NA	0.149	0.337	0.046	0.072	0.172	0.134	0	0.84	0.073	0	0	0	0.166	0.197	0.163	0.333	0.787	0	0.322	0.474	As548_TRINITY_DN33138_c0_g1	1.11e-66	NA	NA	NA	0.759	0	0.353	NA	NA	NA	NA	NA	NA	NA	NA	NA	NA
TRINITY_DN853_c1_g1_i2	2192	2	NA	NA	NA	TRINITY_DN853_c1_g1	2549	NA	NA	NA	NA	2317	3.95	0.695	0	3568	0.527	1439	1742	0.852	2364	2918	1045	3539	4429	1017	2539	5099	0.56	0.279	1739	As548_TRINITY_DN64273_c0_g1	0	NA	NA	NA	13416	7794	1935	NA	NA	NA	NA	NA	NA	NA	NA	NA	NA
TRINITY_DN85406_c1_g2_i1	1348	2	NA	NA	NA	TRINITY_DN85406_c1_g2	1348	NA	NA	NA	NA	0.488	0	0.568	0	0	0.465	0	0	0.364	0.737	0	0.555	0.244	0	0.672	0.416	0	1.06	0	0	As548_TRINITY_DN712_c3_g1	2.52e-82	NA	NA	NA	0	0	0.523	chr6S	791126047	85034	441	1.28e-121	442	chr6S	791127075	88213	263
TRINITY_DN8559_c0_g1_i6	2759	2	NA	NA	NA	TRINITY_DN8559_c0_g1	3457	NA	NA	NA	NA	0.081	0	0.417	0	0.578	0.238	0.617	0.486	0.374	0	0.422	0.149	0	0.394	0	0.25	0.407	0	0	0	As548_TRINITY_DN8911_c0_g1	0	NA	NA	NA	3946	10608	6748	NA	NA	NA	NA	NA	NA	NA	NA	NA	NA
TRINITY_DN860_c0_g1_i12	2690	2	NA	NA	NA	TRINITY_DN860_c0_g1	3264	NA	NA	NA	jcf7180001934717	0	3553	1958	0.542	4379	1643	3271	6942	2378	0.325	7407	1717	2.59	6042	1334	2216	5177	0	0.881	1621	As548_TRINITY_DN4106_c0_g1	0	NA	NA	NA	2567	7618	1616	NA	NA	NA	NA	NA	NA	NA	NA	NA	NA
TRINITY_DN860_c0_g1_i20	2707	2	NA	NA	NA	TRINITY_DN860_c0_g1	3264	NA	NA	NA	jcf7180001934717	1098	2.24	0	0	2321	0.734	0	3759	0.519	0	2227	0.427	2463	2196	0.01	1987	2276	0.214	0.58	0	As548_TRINITY_DN4106_c0_g1	0	NA	NA	NA	2567	7618	1616	NA	NA	NA	NA	NA	NA	NA	NA	NA	NA
TRINITY_DN8611_c0_g1_i6	955	2	NA	NA	NA	TRINITY_DN8611_c0_g1	1457	NA	NA	NA	NA	0	1313	0	0	0	0	0	0	0	0.043	1.49	0	0	0	0	0.375	0	0	0	0	As548_TRINITY_DN12140_c0_g1	0	NA	NA	NA	12437	18851	10458	chr6B	621821809	84.98	253	6.97e-65	254	NA	NA	NA	NA
TRINITY_DN8616_c0_g1_i7	2452	2	NA	NA	NA	TRINITY_DN8616_c0_g1	3864	NA	NA	NA	NA	0	0	0.116	0	0	0	0	0	0	0	0	0	0	0	0	0	0	0	0	0	As548_TRINITY_DN9077_c0_g1	3.21e-120	NA	NA	NA	0.489	8752	0.91	NA	NA	NA	NA	NA	NA	NA	NA	NA	NA
TRINITY_DN8627_c0_g1_i11	1439	2	NA	NA	NA	TRINITY_DN8627_c0_g1	2467	NA	NA	NA	NA	0	0.397	0	0	0	0.196	0	0	0	0	0	0.224	0	0	0	0	0	0	0	0	As548_TRINITY_DN6811_c1_g1	0	NA	NA	NA	4775	13203	6601	NA	NA	NA	NA	NA	NA	NA	NA	NA	NA
TRINITY_DN8633_c0_g1_i12	1391	2	NA	NA	NA	TRINITY_DN8633_c0_g1	2203	NA	NA	NA	NA	0	0	0.22	0	0	0.217	0	0	0	0	0	0	0	0	0	0	0	0	0	0	As548_TRINITY_DN1425_c1_g1	0	NA	NA	NA	6064	3536	2674	NA	NA	NA	NA	NA	NA	NA	NA	NA	NA
TRINITY_DN86524_c0_g1_i2	532	2	NA	NA	NA	TRINITY_DN86524_c0_g1	773	NA	NA	NA	NA	0	0.409	0.707	0	0	0.754	0	0.044	0.987	0.976	0	1109	0	0.348	0.48	0.572	0	1844	1784	0.569	As548_TRINITY_DN356_c0_g3	4.48e-177	NA	NA	NA	1578	1953	1548	NA	NA	NA	NA	NA	NA	NA	NA	NA	NA
TRINITY_DN8652_c0_g1_i11	735	2	NA	NA	NA	TRINITY_DN8652_c0_g1	2148	NA	NA	NA	NA	0	0.253	0.035	0	0	0.124	0	0	0.083	0.542	0.26	0	0.254	0	0.173	0	0.674	0	0	0	As548_TRINITY_DN2243_c0_g1	0	NA	NA	NA	1399	2613	2242	NA	NA	NA	NA	NA	NA	NA	NA	NA	NA
TRINITY_DN8652_c0_g1_i8	534	2	NA	NA	NA	TRINITY_DN8652_c0_g1	2148	NA	NA	NA	NA	0	0	2.12	0	0.223	2015	2.84	0.769	1246	0.716	2765	1045	1095	2249	1353	0.593	2325	0	0.709	0	As548_TRINITY_DN2243_c0_g1	0	NA	NA	NA	1399	2613	2242	NA	NA	NA	NA	NA	NA	NA	NA	NA	NA
TRINITY_DN8676_c0_g1_i1	4349	2	NA	NA	NA	TRINITY_DN8676_c0_g1	4687	NA	NA	NA	NA	0	4408	0	0.277	3872	0	0	0.088	0	0.759	0	0	0	1469	0	0	0.787	0	0	0	As548_TRINITY_DN3770_c0_g1	0	NA	NA	NA	3626	5383	3778	NA	NA	NA	NA	NA	NA	NA	NA	NA	NA
TRINITY_DN8682_c0_g1_i2	2680	2	NA	NA	NA	TRINITY_DN8682_c0_g1	4405	NA	NA	NA	NA	0	0.361	0	0	0	0	0.235	0	0	0.195	0	0	0	0	0	0	0	0	0	0	As548_TRINITY_DN8566_c0_g1	0	NA	NA	NA	1918	2287	4108	NA	NA	NA	NA	NA	NA	NA	NA	NA	NA
TRINITY_DN868_c0_g1_i1	3198	2	NA	NA	NA	TRINITY_DN868_c0_g1	4044	NA	NA	NA	NA	0.393	1746	0.811	1167	0.892	0.723	0	1.45	0.779	0	0.467	0.437	1466	1613	0.681	1467	2444	1111	1483	2569	As548_TRINITY_DN1704_c1_g1	0	NA	NA	NA	8351	12429	6987	NA	NA	NA	NA	NA	NA	NA	NA	NA	NA
TRINITY_DN868_c0_g1_i5	1704	2	NA	NA	NA	TRINITY_DN868_c0_g1	4044	NA	NA	NA	NA	4024	6467	2977	1119	3913	2863	1802	6677	4.58	1095	7138	2602	5024	5277	3032	5785	7242	3026	2397	3565	As548_TRINITY_DN1704_c1_g1	0	NA	NA	NA	8351	12429	6987	NA	NA	NA	NA	NA	NA	NA	NA	NA	NA
TRINITY_DN868_c0_g1_i6	3168	2	NA	NA	NA	TRINITY_DN868_c0_g1	4044	NA	NA	NA	NA	1653	3649	1969	0.746	3274	1664	3437	4723	2877	2331	3053	2602	3.48	6.11	2543	5161	4277	1212	0.301	1407	As548_TRINITY_DN1704_c1_g1	0	NA	NA	NA	8351	12429	6987	NA	NA	NA	NA	NA	NA	NA	NA	NA	NA
TRINITY_DN8691_c0_g1_i7	2951	2	NA	NA	NA	TRINITY_DN8691_c0_g1	3210	NA	NA	NA	NA	0.19	1.71	0.359	0	0.304	0.579	0	0.195	0.228	0	0.718	0.299	0.469	0.999	0.403	0.77	1264	0.744	0	0	As548_TRINITY_DN9792_c0_g1	0	NA	NA	NA	2587	2058	2686	NA	NA	NA	NA	NA	NA	NA	NA	NA	NA
TRINITY_DN87125_c0_g1_i7	1167	2	NA	NA	NA	TRINITY_DN87125_c0_g1	2092	NA	NA	NA	jcf7180001525575	0.393	0.289	0.417	0.457	0.801	0.816	0.441	0.133	0.218	1117	0.198	1088	1652	0.56	1219	1.8	0.119	0	0.215	0	As548_TRINITY_DN4665_c0_g1	1.36e-111	NA	NA	NA	0.989	1188	0.808	chr6S	531066800	86867	632	0	671	chr6S	531063914	94318	264
TRINITY_DN8719_c0_g1_i8	1059	2	NA	NA	NA	TRINITY_DN8719_c0_g1	4612	NA	NA	NA	NA	0.081	0	0.556	0	0.335	0.641	0	0.124	0.364	1171	0	0.085	0.049	0	0.067	0.219	0.239	0	0	0	As548_TRINITY_DN839_c0_g1	0	NA	NA	NA	3486	4856	5656	NA	NA	NA	NA	NA	NA	NA	NA	NA	NA
TRINITY_DN87246_c0_g1_i1	304	2	NA	NA	NA	TRINITY_DN87246_c0_g1	304	NA	NA	NA	NA	0	2071	0.996	0	0	0	0	0	2981	0	0	0	0	2014	1008	0	0	0	0	0	As548_TRINITY_DN94238_c0_g1	1.28e-09	NA	NA	NA	0	0	3573	NA	NA	NA	NA	NA	NA	NA	NA	NA	NA
TRINITY_DN8737_c0_g1_i16	7234	2	NA	NA	NA	TRINITY_DN8737_c0_g1	8159	NA	NA	NA	NA	0.108	1144	0.243	0	0.395	0.217	0	0	0.447	0	0.242	0.523	0.186	0.356	0.393	0.822	0.464	0	0	0.356	As548_TRINITY_DN18596_c0_g3	0	NA	NA	NA	3806	2929	4802	NA	NA	NA	NA	NA	NA	NA	NA	NA	NA
TRINITY_DN8772_c0_g1_i10	1157	2	NA	NA	NA	TRINITY_DN8772_c0_g1	1573	NA	NA	NA	NA	0	1987	1077	3526	1652	1509	0	1229	0.426	0	1877	1408	1.76	0.416	1142	0.146	2964	0	4621	0	As548_TRINITY_DN833_c0_g1	0	NA	NA	NA	4345	2947	3664	NA	NA	NA	NA	NA	NA	NA	NA	NA	NA
TRINITY_DN87939_c0_g1_i2	959	2	NA	NA	NA	TRINITY_DN87939_c0_g1	1594	NA	NA	NA	NA	0	0.458	0.95	0	0	0.486	0	0	0	0.217	0.952	0.459	0	0	0.998	0.062	1032	0	0	0	As548_TRINITY_DN3813_c1_g2	0	NA	NA	NA	0.23	0.299	1582	NA	NA	NA	NA	NA	NA	NA	NA	NA	NA
TRINITY_DN8809_c0_g1_i7	1997	2	NA	NA	NA	TRINITY_DN8809_c0_g1	3489	NA	NA	NA	NA	0	0.47	0	0	0	0	0	0	0	0	0.198	0	0.723	0.356	0.576	0	0	0	0.129	0	As548_TRINITY_DN5987_c0_g1	0	NA	NA	NA	1778	0.51	3608	NA	NA	NA	NA	NA	NA	NA	NA	NA	NA
TRINITY_DN8828_c0_g1_i21	1443	2	NA	NA	NA	TRINITY_DN8828_c0_g1	3179	NA	NA	NA	jcf7180001546234	0.948	1517	0.069	0	0.122	0.269	0	1114	0.457	1355	1329	0.256	1779	0.363	0.509	2362	1784	0	0	1.96	As548_TRINITY_DN19026_c0_g1	3.28e-149	NA	NA	NA	3466	2014	0.819	chr6S	520058245	97525	202	2.47e-92	346	chr6S	520057948	97838	185
TRINITY_DN88571_c0_g1_i3	502	2	NA	NA	NA	TRINITY_DN88571_c0_g1	709	NA	NA	NA	jcf7180001928727	0	0	0.324	0	0	0.072	3467	0	0	0	0	0.064	0	0.333	0	0.198	0.302	0	0	0	As548_TRINITY_DN13131_c0_g3	1.77e-46	NA	NA	NA	14655	1575	3824	chr6B	191540137	97186	533	0	898	NA	NA	NA	NA
TRINITY_DN8857_c0_g2_i1	2375	2	NA	NA	NA	TRINITY_DN8857_c0_g2	3691	NA	NA	NA	jcf7180001576817	0.339	0.506	0.741	0.06	0.608	0.134	0.529	1203	0.53	0.195	0.844	0.427	0.567	1423	0.509	1009	0.955	0.041	0	0.719	As548_TRINITY_DN11565_c0_g1	0	NA	NA	NA	1468	1205	1331	NA	NA	NA	NA	NA	NA	NA	NA	NA	NA
TRINITY_DN8859_c0_g1_i8	2393	2	NA	NA	NA	TRINITY_DN8859_c0_g1	3484	NA	NA	NA	jcf7180001939862	0	0.072	0.417	0	0.152	0.217	0	0.142	0.602	0.217	0	0.395	0.371	0.681	0.461	0.447	0.253	0.041	0	0	As548_TRINITY_DN4374_c0_g1	0	NA	NA	NA	3776	3818	4939	chr6B	634334199	98542	343	1.12e-170	606	chr6B	634331905	99083	327
TRINITY_DN88_c0_g3_i1	1602	2	NA	NA	NA	TRINITY_DN88_c0_g3	2315	NA	NA	NA	jcf7180001525057	1816	2168	0.695	1252	1156	1323	0.607	1831	1537	2017	1571	1397	3226	1227	0.969	2622	2613	1.09	1333	0.253	As548_TRINITY_DN26323_c0_g1	4.12e-122	NA	NA	NA	0	2085	0.41	chr6S	496404050	93978	548	0	828	chr6S	496404836	94026	385
TRINITY_DN8908_c0_g1_i6	1679	2	NA	NA	NA	TRINITY_DN8908_c0_g1	2070	NA	NA	NA	NA	0	0	0.591	0	0.304	0.176	0	0	1589	0.477	1042	0.885	0.499	1158	0.355	1498	1032	0.051	0	0	As548_TRINITY_DN3378_c0_g1	1.27e-151	NA	NA	NA	32975	3079	6009	NA	NA	NA	NA	NA	NA	NA	NA	NA	NA
TRINITY_DN89327_c0_g1_i1	1237	2	NA	NA	NA	TRINITY_DN89327_c0_g1	1540	NA	NA	NA	NA	0	0.265	0.232	0	0.112	0.599	0	0.212	0.613	0	0.126	0.938	0.254	0.144	0.461	0.281	0.091	0.937	0	0	As548_TRINITY_DN2230_c2_g1	9.09e-177	NA	NA	NA	2038	3052	4643	NA	NA	NA	NA	NA	NA	NA	NA	NA	NA
TRINITY_DN8932_c0_g1_i2	1151	2	NA	NA	NA	TRINITY_DN8932_c0_g1	1243	NA	NA	NA	jcf7180001935645	7032	8274	8143	11012	6082	9136	9528	7066	11705	8056	8521	10601	7889	5179	12014	7179	9391	7886	4944	7549	As548_TRINITY_DN36765_c0_g1	0	NA	NA	NA	25413	36048	50175	chr6S	622752194	92844	545	0	767	chr6S	622747980	98.78	328
TRINITY_DN8939_c0_g1_i10	1751	2	NA	NA	NA	TRINITY_DN8939_c0_g1	3450	NA	NA	NA	jcf7180001733506	0	0.674	1.83	0.963	0.476	2863	0.176	0.531	1371	0	0.62	2.4	0.743	0.75	2198	1238	0.99	1294	0.365	0	As548_TRINITY_DN2409_c0_g2	0	NA	NA	NA	26862	2182	7.17	NA	NA	NA	NA	NA	NA	NA	NA	NA	NA
TRINITY_DN8940_c0_g1_i20	2223	2	NA	NA	NA	TRINITY_DN8940_c0_g1	2837	NA	NA	NA	NA	0	0	0.741	0	0	0	0	0	0	0	0	0	0.088	0.363	0.288	0.031	0	0	0	0	As548_TRINITY_DN7211_c1_g1	0	NA	NA	NA	1858	1249	3778	NA	NA	NA	NA	NA	NA	NA	NA	NA	NA
TRINITY_DN8940_c0_g1_i3	2193	2	NA	NA	NA	TRINITY_DN8940_c0_g1	2837	NA	NA	NA	NA	0.298	0.686	0.371	0.277	0.76	1685	0	0.398	1963	1019	0.745	1781	1.73	0.591	1286	1176	0	1.06	0	0	As548_TRINITY_DN7211_c1_g1	0	NA	NA	NA	1858	1249	3778	NA	NA	NA	NA	NA	NA	NA	NA	NA	NA
TRINITY_DN8951_c0_g1_i2	1907	2	NA	NA	NA	TRINITY_DN8951_c0_g1	2611	NA	NA	NA	jcf7180001526981	0.176	1529	1077	0.818	1115	0.971	0.382	0.442	1475	0.358	1616	0.821	1085	1272	1574	0.645	0.871	1039	0.312	0.372	As548_TRINITY_DN6968_c0_g1	0	NA	NA	NA	5145	4082	2879	chr6B	708674284	88471	425	1.48e-133	483	chr6B	708674064	96078	255
TRINITY_DN8956_c0_g1_i7	1480	2	NA	NA	NA	TRINITY_DN8956_c0_g1	2058	NA	NA	NA	NA	0	0.385	0.776	0	0.75	0.351	0	0	0.769	0.434	0	0.661	0	0	0.566	0.052	0.597	2119	0.204	0	As548_TRINITY_DN60539_c0_g1	0	NA	NA	NA	3836	3431	4.7	chr6S	738807902	95652	69	6.31e-22	111	NA	NA	NA	NA
TRINITY_DN8972_c0_g1_i2	769	2	NA	NA	NA	TRINITY_DN8972_c0_g1	1577	NA	NA	NA	NA	0.813	2071	1.17	3238	0.264	1623	2654	0.239	3209	2689	1176	1973	1056	0	1862	1.8	0.674	0	1247	0.783	As548_TRINITY_DN2081_c0_g1	1.55e-174	NA	NA	NA	3446	4.53	9559	NA	NA	NA	NA	NA	NA	NA	NA	NA	NA
TRINITY_DN8975_c0_g1_i7	2583	2	NA	NA	NA	TRINITY_DN8975_c0_g1	3340	NA	NA	NA	NA	0.135	1048	0.903	0.698	1044	1158	0	1574	1402	1583	1185	2453	0.596	0.083	1516	0.208	0.674	2028	1.29	2.34	As548_TRINITY_DN62_c0_g2	0	NA	NA	NA	1079	1451	4097	NA	NA	NA	NA	NA	NA	NA	NA	NA	NA
TRINITY_DN8982_c0_g2_i2	3347	2	NA	NA	NA	TRINITY_DN8982_c0_g2	4154	NA	NA	NA	jcf7180001941209	2873	24315	2039	2732	33401	4041	2575	23.48	3427	6875	21638	3882	6481	26227	3244	5015	10894	6134	0.849	8814	As548_TRINITY_DN2034_c0_g1	0	NA	NA	NA	11558	7547	6282	chr6S	796964135	95148	474	0	743	chr6S	796961954	95642	413
TRINITY_DN8982_c0_g2_i8	3517	2	NA	NA	NA	TRINITY_DN8982_c0_g2	4154	NA	NA	NA	jcf7180001941209	0.271	1758	0	0	6204	0.32	0	3821	0.28	0	4759	0.128	0.059	4202	0.336	0.031	2227	0.927	0	3557	As548_TRINITY_DN2034_c0_g1	0	NA	NA	NA	11558	7547	6282	chr6S	796964135	95148	474	0	743	chr6S	796961954	95642	413
TRINITY_DN8994_c0_g1_i1	2036	2	NA	NA	NA	TRINITY_DN8994_c0_g1	2198	NA	NA	NA	NA	1531	3119	0.672	0.578	2544	0.682	1107	2069	0.789	2342	2622	0.213	2199	3574	1027	2726	4523	0.489	1.73	2261	As548_TRINITY_DN102031_c0_g1	0	NA	NA	NA	1089	1249	0.25	NA	NA	NA	NA	NA	NA	NA	NA	NA	NA
TRINITY_DN8999_c0_g1_i3	2226	2	NA	NA	NA	TRINITY_DN8999_c0_g1	3201	NA	NA	NA	jcf7180001939521	0.501	1.12	0.452	0.505	0.841	0	0.715	0.531	0.197	0.976	0.745	0	0.117	0.583	0.086	0.822	0.836	0	0.613	0	As548_TRINITY_DN7673_c1_g5	0	NA	NA	NA	0	1012	0.182	chr6B	476430338	94437	1582	0	2381	chr6B	476428713	96388	526
TRINITY_DN9012_c0_g1_i5	3271	2	NBSLRR	412	2254	TRINITY_DN9012_c0_g1	5884	NBSLRR	671	2867	NA	0	0	0.116	0	0.152	0.455	0	0	0	0	0	0	0	0	0.211	0	0	0	0	0	As548_TRINITY_DN29917_c1_g1	0	NA	NA	NA	0	0.528	0.91	chr6S	326904013	100	43	5.13e-12	80.5	chr6S	462682605	100	43
TRINITY_DN9100_c0_g1_i16	4172	2	NA	NA	NA	TRINITY_DN9100_c0_g1	4773	NA	NA	NA	NA	0	0	0.313	0	0	0	0	0.159	0	0	0	0	0	0.045	0	0	0	0	0	0	As548_TRINITY_DN4133_c0_g1	0	NA	NA	NA	3946	3457	3801	NA	NA	NA	NA	NA	NA	NA	NA	NA	NA
TRINITY_DN9111_c0_g1_i20	3095	2	NA	NA	NA	TRINITY_DN9111_c0_g1	4376	NA	NA	NA	NA	0	2108	0.429	0.963	0	1302	3506	0	0.436	0	0	0.981	1476	1015	0.345	0.208	0	0.102	0	1289	As548_TRINITY_DN20_c0_g1	0	NA	NA	NA	3486	4609	3175	NA	NA	NA	NA	NA	NA	NA	NA	NA	NA
TRINITY_DN9111_c0_g1_i21	3322	2	NA	NA	NA	TRINITY_DN9111_c0_g1	4376	NA	NA	NA	NA	0.447	1.18	0	0	0	1199	0	0.027	0	0.857	1706	1557	0.137	4157	0.211	0	1103	1498	0	0	As548_TRINITY_DN20_c0_g1	0	NA	NA	NA	3486	4609	3175	NA	NA	NA	NA	NA	NA	NA	NA	NA	NA
TRINITY_DN9111_c0_g1_i6	3394	2	NA	NA	NA	TRINITY_DN9111_c0_g1	4376	NA	NA	NA	NA	0.081	0.229	0	0	1531	0.134	0	0.186	0	0	0.611	0.331	0.02	1696	0.067	0	0.351	0	0	0	As548_TRINITY_DN20_c0_g1	0	NA	NA	NA	3486	4609	3175	NA	NA	NA	NA	NA	NA	NA	NA	NA	NA
TRINITY_DN9153_c0_g1_i4	1582	2	NA	NA	NA	TRINITY_DN9153_c0_g1	2096	NA	NA	NA	NA	0.596	0.723	0.533	0	0.71	0.165	0	0.752	0.135	0	1176	0.555	0.254	0.371	0.23	0.125	1335	0	0	1328	As548_TRINITY_DN6078_c0_g2	0	NA	NA	NA	1029	3888	2117	NA	NA	NA	NA	NA	NA	NA	NA	NA	NA
TRINITY_DN9171_c0_g1_i7	4149	2	NA	NA	NA	TRINITY_DN9171_c0_g1	4358	NA	NA	NA	NA	0	1782	0.324	0	0.314	0.434	0	0.654	0.156	0	0.602	0.576	1349	0.469	0.067	1.28	0	0	0	0	As548_TRINITY_DN8240_c0_g1	0	NA	NA	NA	3057	4671	1969	NA	NA	NA	NA	NA	NA	NA	NA	NA	NA
TRINITY_DN920_c0_g1_i4	3122	2	NA	NA	NA	TRINITY_DN920_c0_g1	7263	NA	NA	NA	NA	0.447	3035	1251	1131	2.99	1995	0.539	2184	2129	0.488	2119	2506	1447	3263	1.67	1582	4572	1.1	0	2087	As548_TRINITY_DN770_c0_g1	0	NA	NA	NA	11688	17338	33105	chr6B	117773022	91026	156	2.16e-51	211	chr6B	117791998	91026	156
TRINITY_DN9216_c0_g1_i5	1806	2	NA	NA	NA	TRINITY_DN9216_c0_g1	2531	NA	NA	NA	NA	0	0.145	0.035	0.301	3518	0.858	0	4546	0.779	0.553	3448	0.576	0.743	1098	0	0.01	1805	0.01	0	7059	As548_TRINITY_DN986_c1_g1	0	NA	NA	NA	6503	11.84	3277	NA	NA	NA	NA	NA	NA	NA	NA	NA	NA
TRINITY_DN921_c0_g1_i10	908	2	NA	NA	NA	TRINITY_DN921_c0_g1	1872	NA	NA	NA	NA	0	1024	0.521	0	1328	0.227	0	0	2503	0	0	1386	0	0.606	0.365	0	0.681	0	0.602	0	As548_TRINITY_DN8781_c0_g1	3.49e-87	NA	NA	NA	2827	6113	16228	chr6S	725208799	88.71	124	4.37e-33	148	chr6S	223679863	87.5	128
TRINITY_DN9261_c0_g1_i10	1249	2	NA	NA	NA	TRINITY_DN9261_c0_g1	2104	NA	NA	NA	NA	0	0.674	0	0	1399	0.475	0	0.389	0.924	0	0	0.661	0.244	0.038	0.806	0	0.112	0.907	0	0	As548_TRINITY_DN14300_c0_g1	0	NA	NA	NA	0.15	1645	2162	NA	NA	NA	NA	NA	NA	NA	NA	NA	NA
TRINITY_DN9267_c0_g1_i11	2211	2	NA	NA	NA	TRINITY_DN9267_c0_g1	2585	NA	NA	NA	jcf7180001661938	0.108	0	0.799	0.53	0	1.53	0.069	0.416	1984	0.054	0	0.619	0	0	0.864	0	0.14	0	0	0	As548_TRINITY_DN15447_c0_g1	0	NA	NA	NA	2857	1874	5508	chr6B	33372474	93952	248	9.18e-101	374	chr6B	612967285	95.5	200
TRINITY_DN9267_c0_g1_i13	2251	2	NA	NA	NA	TRINITY_DN9267_c0_g1	2585	NA	NA	NA	jcf7180001633084	1.03	1.77	0.846	0	0.061	2046	1009	0.142	1329	2114	0.889	1301	1554	2294	1276	2.57	0	1956	0.301	0.229	As548_TRINITY_DN15447_c0_g1	0	NA	NA	NA	2857	1874	5508	chr6B	33372474	93952	248	9.18e-101	374	chr6B	612967285	95.5	200
TRINITY_DN9267_c0_g1_i9	2251	2	NA	NA	NA	TRINITY_DN9267_c0_g1	2585	NA	NA	NA	jcf7180001633084	0.827	1626	0.892	1661	0	1798	0.813	0.239	1028	0.271	0.189	1674	2278	0.765	0.739	2903	0	1671	1.44	0	As548_TRINITY_DN15447_c0_g1	0	NA	NA	NA	2857	1874	5508	chr6B	33372474	93952	248	9.18e-101	374	chr6B	612967285	95.5	200
TRINITY_DN9312_c0_g1_i4	2651	2	NA	NA	NA	TRINITY_DN9312_c0_g1	3258	NA	NA	NA	NA	0.298	0.542	0.834	0.132	0.628	0.703	0	0.548	0.737	0.369	0.826	0.501	0.371	0.659	0.537	0.395	0.864	0.295	0.086	0.719	As548_TRINITY_DN17472_c0_g1	0	NA	NA	NA	0.36	2419	1206	NA	NA	NA	NA	NA	NA	NA	NA	NA	NA
TRINITY_DN9319_c0_g1_i8	2219	2	NA	NA	NA	TRINITY_DN9319_c0_g1	2708	NA	NA	NA	NA	0.244	1578	1274	0	0	0.568	0	0.787	1194	0	0	0.384	0.831	0.984	1363	0.01	0.92	1936	0.075	0	As548_TRINITY_DN10218_c0_g1	0	NA	NA	NA	1738	2375	3061	NA	NA	NA	NA	NA	NA	NA	NA	NA	NA
TRINITY_DN933_c0_g1_i11	1553	2	NA	NA	NA	TRINITY_DN933_c0_g1	2803	NA	NA	NA	NA	1612	3625	2166	0.253	2291	1767	2321	3.44	2056	3144	2343	1941	4487	2726	1612	3912	4411	0.571	0	1.96	As548_TRINITY_DN1114_c0_g1	0	NA	NA	NA	14994	8796	6.35	NA	NA	NA	NA	NA	NA	NA	NA	NA	NA
TRINITY_DN9350_c0_g1_i12	1779	2	NA	NA	NA	TRINITY_DN9350_c0_g1	2995	NA	NA	NA	NA	0.569	0	1517	0.457	0.507	1127	0.676	0.212	1797	0.293	0.171	1621	0.655	0.167	1209	0.541	0.197	1049	0.075	0.372	As548_TRINITY_DN31225_c0_g1	0	NA	NA	NA	3746	4609	14055	NA	NA	NA	NA	NA	NA	NA	NA	NA	NA
TRINITY_DN9350_c0_g1_i13	2396	2	NA	NA	NA	TRINITY_DN9350_c0_g1	2995	NA	NA	NA	NA	0	0	0.95	0	0.294	1282	0	0	0.55	0	0	1013	0.235	0	1171	0.312	0.527	0	0	0.846	As548_TRINITY_DN31225_c0_g1	0	NA	NA	NA	3746	4609	14055	NA	NA	NA	NA	NA	NA	NA	NA	NA	NA
TRINITY_DN9350_c0_g1_i4	2314	2	NA	NA	NA	TRINITY_DN9350_c0_g1	2995	NA	NA	NA	NA	0.379	0.193	0.973	0.397	0	0.227	0	0.062	1589	0.358	0.79	0.757	0.274	0.757	0.653	0	0	1009	0	0	As548_TRINITY_DN31225_c0_g1	0	NA	NA	NA	3746	4609	14055	NA	NA	NA	NA	NA	NA	NA	NA	NA	NA
TRINITY_DN9363_c0_g1_i4	3991	2	NBSLRR	77	1975	TRINITY_DN9363_c0_g1	4799	NBSLRR	148	2553	NA	0.122	0.542	0.127	0	0.446	0.124	0.118	0.539	0.353	0	0.808	0.352	0.342	0.659	0.297	0.874	0.576	0	0.247	0.727	As548_TRINITY_DN4348_c1_g1	0	NBSLRR	2913	4262	3396	2551	4541	NA	NA	NA	NA	NA	NA	NA	NA	NA	NA
TRINITY_DN9397_c0_g1_i2	935	2	NA	NA	NA	TRINITY_DN9397_c0_g1	1393	NA	NA	NA	NA	0.312	0.181	0.313	0.806	0.456	0.248	0	0.177	0.208	0	0.045	0.651	0	0.772	0.432	0.354	0.442	0	0.236	0.656	As548_TRINITY_DN2709_c0_g1	0	NA	NA	NA	9051	4.68	3209	chr6B	83251318	98305	59	7.1e-20	104	chr6B	83264235	94915	59
TRINITY_DN940_c0_g1_i10	1737	2	NA	NA	NA	TRINITY_DN940_c0_g1	3381	NA	NA	NA	NA	0.488	2.77	2212	0	1.49	2098	0.304	1194	1506	0.586	1885	1557	1486	2173	3061	1373	2205	3158	0.054	1107	As548_TRINITY_DN5542_c0_g1	0	NA	NA	NA	8351	15728	16718	NA	NA	NA	NA	NA	NA	NA	NA	NA	NA
TRINITY_DN9415_c0_g1_i1	2295	2	NA	NA	NA	TRINITY_DN9415_c0_g1	3537	NA	NA	NA	NA	1816	0.518	3625	2744	1683	2914	2928	0.398	4289	2.96	0	4426	2845	0	3.1	3548	0	3607	3353	0	As548_TRINITY_DN9392_c0_g1	0	NA	NA	NA	0.44	0.449	0.637	NA	NA	NA	NA	NA	NA	NA	NA	NA	NA
TRINITY_DN9415_c0_g1_i10	2674	2	NA	NA	NA	TRINITY_DN9415_c0_g1	3537	NA	NA	NA	NA	1477	0.795	1911	0.469	0.233	3317	0	0	3542	2288	0.539	3061	0.538	0.015	1929	1925	0.372	3281	0.774	0	As548_TRINITY_DN9392_c0_g1	0	NA	NA	NA	0.44	0.449	0.637	NA	NA	NA	NA	NA	NA	NA	NA	NA	NA
TRINITY_DN9415_c0_g1_i12	2670	2	NA	NA	NA	TRINITY_DN9415_c0_g1	3537	NA	NA	NA	NA	2073	0	2722	3382	0	2181	2752	0.363	3292	1355	0.808	5087	1173	1015	3426	1686	0.815	1936	1193	1415	As548_TRINITY_DN9392_c0_g1	0	NA	NA	NA	0.44	0.449	0.637	NA	NA	NA	NA	NA	NA	NA	NA	NA	NA
TRINITY_DN9435_c0_g1_i2	460	2	NA	NA	NA	TRINITY_DN9435_c0_g1	1331	NA	NA	NA	jcf7180001890578	7493	12055	9649	3442	7856	13001	7638	18086	10.22	4467	16835	6591	14936	18012	7619	17803	15.15	1671	1.29	8198	As548_TRINITY_DN131_c0_g1	4.08e-95	NA	NA	NA	30528	34473	30.59	chr6S	474721337	93897	426	1.94e-179	634	chr6S	474720205	95.57	158
TRINITY_DN9460_c0_g1_i4	1331	2	NA	NA	NA	TRINITY_DN9460_c0_g1	5024	NA	NA	NA	NA	0.976	0.482	1344	0.674	0	1.22	0	0.274	0.893	0	0.691	1514	0.782	0.863	1.66	0.603	0.4	0	0	0.617	As548_TRINITY_DN1557_c0_g1	0	NA	NA	NA	2757	0.897	4552	chr6S	116555676	94054	185	4.02e-72	279	chr6S	255373070	93514	185
TRINITY_DN9491_c0_g1_i11	1560	2	NA	NA	NA	TRINITY_DN9491_c0_g1	3025	NA	NA	NA	NA	0.447	0.915	0.683	0.65	1014	0.548	0.196	1654	0.935	0.629	0.997	0.875	1701	0.515	0.633	1238	1468	0.856	0.656	0	As548_TRINITY_DN6704_c0_g1	0	NA	NA	NA	3706	2111	4063	NA	NA	NA	NA	NA	NA	NA	NA	NA	NA
TRINITY_DN9493_c0_g1_i2	2580	2	NA	NA	NA	TRINITY_DN9493_c0_g1	3397	NA	NA	NA	jcf7180001889266	0.325	0.132	0.614	0	0.253	0.227	0	0.053	0.623	0.358	0	0.427	0.567	0.454	0.624	0	0.274	0	0.193	0.617	As548_TRINITY_DN11006_c0_g1	0	NA	NA	NA	1938	3096	4814	chr6B	497054	82443	262	1.29e-55	224	NA	NA	NA	NA
TRINITY_DN9493_c0_g1_i7	2983	2	NA	NA	NA	TRINITY_DN9493_c0_g1	3397	NA	NA	NA	jcf7180001889266	0.298	1.12	0.961	0	1095	1158	0	0.849	0.623	0	0.386	0.821	0.303	0.681	1612	0.635	0.478	0.948	0.398	0.53	As548_TRINITY_DN11006_c0_g1	0	NA	NA	NA	1938	3096	4814	chr6B	497054	82443	262	1.29e-55	224	NA	NA	NA	NA
TRINITY_DN95333_c0_g2_i2	581	2	NA	NA	NA	TRINITY_DN95333_c0_g2	1154	NA	NA	NA	jcf7180001927981	0	0	0.197	0	0	0.052	0	0	0	0	0	0	0.088	0	0.288	0	0.091	0	0	0	As548_TRINITY_DN19671_c0_g1	0	NA	NA	NA	1808	1531	0.808	chr6S	65295931	100	417	0	771	chr6S	65200410	80057	707
TRINITY_DN954_c0_g1_i6	2442	2	NA	NA	NA	TRINITY_DN954_c0_g1	3174	NA	NA	NA	NA	0	0.626	1332	1805	1612	0.951	0	1353	0.81	0	0	1376	1945	2279	1161	0.76	2873	1233	0	0.047	As548_TRINITY_DN19314_c0_g1	0	NA	NA	NA	14405	7547	7773	NA	NA	NA	NA	NA	NA	NA	NA	NA	NA
TRINITY_DN9573_c0_g1_i1	262	2	NA	NA	NA	TRINITY_DN9573_c0_g1	1021	NA	NA	NA	jcf7180001925109	0	11.61	11768	0	11536	9601	0	0	11684	0	0	13299	4927	17096	9788	0	0.864	0	0	0	As548_TRINITY_DN290_c0_g1	2.64e-31	NA	NA	NA	15004	38933	22089	chr6B	631192926	92181	243	1.3e-90	339	chr6B	631535281	83566	286
TRINITY_DN959_c1_g1_i4	1609	2	NA	NA	NA	TRINITY_DN959_c1_g1	4185	NA	NA	NA	jcf7180001739757	1.45	2818	1795	0	1946	2046	3163	2503	2119	1.03	5827	2943	2385	4853	2.15	2841	7909	0.723	2.73	18664	As548_TRINITY_DN277_c0_g1	0	NA	NA	NA	0.37	2182	5212	NA	NA	NA	NA	NA	NA	NA	NA	NA	NA
TRINITY_DN959_c1_g1_i5	980	2	NA	NA	NA	TRINITY_DN959_c1_g1	4185	NA	NA	NA	jcf7180001739757	41706	85433	9834	12288	91162	5405	40247	138379	4715	31814	139.67	7.22	54.78	125958	2303	81638	160915	0	48074	246215	As548_TRINITY_DN277_c0_g1	0	NA	NA	NA	0.37	2182	5212	NA	NA	NA	NA	NA	NA	NA	NA	NA	NA
TRINITY_DN9600_c0_g1_i2	1464	2	NA	NA	NA	TRINITY_DN9600_c0_g1	1536	NA	NA	NA	jcf7180001587081	1165	0.518	1251	1143	0.781	0.434	0	1654	0.945	0	2442	1141	0.538	1.81	1401	0.26	1503	0	0.86	0.308	As548_TRINITY_DN9518_c4_g1	0	NA	NA	NA	2517	1918	4.29	NA	NA	NA	NA	NA	NA	NA	NA	NA	NA
TRINITY_DN9620_c0_g1_i6	1526	2	NA	NA	NA	TRINITY_DN9620_c0_g1	2079	NA	NA	NA	NA	0	0.614	0	0.433	0	0.269	0	0	0	0	0.287	0	0.43	0.189	0	0	0	0	0	0	As548_TRINITY_DN32536_c0_g1	0	NA	NA	NA	1159	4715	2219	NA	NA	NA	NA	NA	NA	NA	NA	NA	NA
TRINITY_DN9627_c0_g1_i1	2061	2	NA	NA	NA	TRINITY_DN9627_c0_g1	2446	NA	NA	NA	jcf7180001722812	1247	1084	3405	0.65	2048	3193	0	0.451	3.5	0.694	1912	3989	2336	3036	3858	1582	2.5	1498	0.881	2087	As548_TRINITY_DN6574_c0_g1	0	NA	NA	NA	9.79	12051	19472	chr6S	736265023	86713	143	2.06e-32	147	chr6S	736265093	93617	94
TRINITY_DN9650_c0_g1_i5	2576	2	NA	NA	NA	TRINITY_DN9650_c0_g1	2626	NA	NA	NA	jcf7180001580278	0.921	1337	0.788	0	0.77	0.248	0	1097	0.447	0.629	1571	0.267	1359	0.136	0.451	1249	1243	0	0.591	1747	As548_TRINITY_DN17795_c0_g1	0	NA	NA	NA	2517	2674	1662	chr6S	591469105	98078	1561	0	2717	chr6S	591472319	88.15	692
TRINITY_DN9655_c0_g1_i4	2323	2	NA	NA	NA	TRINITY_DN9655_c0_g1	3186	NA	NA	NA	NA	0.122	0.446	0	0	0.02	0	0.548	0	0.26	0.466	0	0	0	0	0	0	0.133	0	0	0	As548_TRINITY_DN37957_c0_g1	0	NA	NA	NA	0.19	0	0.683	NA	NA	NA	NA	NA	NA	NA	NA	NA	NA
TRINITY_DN965_c1_g1_i7	2167	2	NA	NA	NA	TRINITY_DN965_c1_g1	4061	NA	NA	NA	NA	0	3456	0.637	0	0	0.94	0	3493	1516	0.249	0	1525	0	0.795	1737	0.926	3912	0	0.559	1668	As548_TRINITY_DN6425_c0_g1	0	NA	NA	NA	5454	10661	5849	NA	NA	NA	NA	NA	NA	NA	NA	NA	NA
TRINITY_DN9730_c0_g1_i15	3746	2	NA	NA	NA	TRINITY_DN9730_c0_g1	4603	NA	NA	NA	jcf7180001890630	0.163	0.855	0.556	0.156	0.213	0.558	0	0.097	1423	0.26	0	0.736	0.557	0.189	0.873	0.25	0.218	0.56	0.161	0.071	As548_TRINITY_DN6393_c0_g1	0	NA	NA	NA	1179	2225	3926	chr6S	144585784	99.13	1149	0	2067	chr6S	144581709	96641	1042
TRINITY_DN973_c0_g1_i10	13395	2	NA	NA	NA	TRINITY_DN973_c0_g1	20787	NA	NA	NA	jcf7180001703043	0.434	0.614	0.846	0.036	0.335	0.971	0	0.142	1059	0.434	0.189	0.981	0.645	0.257	1017	0.468	0.323	0.387	0	0	As548_TRINITY_DN336_c0_g1	0	NA	NA	NA	3656	5419	8547	chr6S	792909178	93043	1538	0	2246	chr6S	792915767	89744	1638
TRINITY_DN9745_c0_g2_i7	1569	2	NA	NA	NA	TRINITY_DN9745_c0_g2	2808	NA	NA	NA	NA	0	1313	1251	1384	0.922	0.92	0	0	1859	0	1033	1472	1261	1658	1526	0.926	1082	2028	0.215	1.02	As548_TRINITY_DN6357_c0_g1	8.04e-150	NA	NA	NA	3287	4601	3881	NA	NA	NA	NA	NA	NA	NA	NA	NA	NA
TRINITY_DN9751_c0_g1_i5	1974	2	NA	NA	NA	TRINITY_DN9751_c0_g1	2722	NA	NA	NA	NA	0	0.397	0.359	0	0.172	0	0.588	0.08	0.177	0	0	1418	0	0.591	0.413	0	1194	0.214	0.193	0.079	As548_TRINITY_DN24432_c0_g1	0	NA	NA	NA	0.939	1926	1593	NA	NA	NA	NA	NA	NA	NA	NA	NA	NA
TRINITY_DN976_c0_g1_i8	1490	2	NA	NA	NA	TRINITY_DN976_c0_g1	3338	NA	NA	NA	jcf7180001555195	1951	2818	2618	2852	0.892	3007	4671	1044	4777	0.857	1.49	3519	3578	2468	2284	2081	0.351	4514	1021	1.66	As548_TRINITY_DN9555_c0_g1	0	NA	NA	NA	46072	16326	49367	NA	NA	NA	NA	NA	NA	NA	NA	NA	NA
TRINITY_DN9781_c0_g1_i12	1585	2	NA	NA	NA	TRINITY_DN9781_c0_g1	2309	NA	NA	NA	NA	1.26	0	2815	0	0	1.55	0	0	2358	0.249	1042	3253	1134	0.984	2639	0.094	0.042	1325	0.398	0.498	As548_TRINITY_DN6775_c0_g1	0	NA	NA	NA	1778	1.24	10083	NA	NA	NA	NA	NA	NA	NA	NA	NA	NA
TRINITY_DN9781_c0_g1_i15	1649	2	NA	NA	NA	TRINITY_DN9781_c0_g1	2309	NA	NA	NA	NA	0	0	0.579	0	0	0.393	0	0	0.499	0	0	0	0	0	0.825	0.832	0	0	0	0	As548_TRINITY_DN6775_c0_g1	0	NA	NA	NA	1778	1.24	10083	NA	NA	NA	NA	NA	NA	NA	NA	NA	NA
TRINITY_DN9797_c0_g1_i2	6192	2	NA	NA	NA	TRINITY_DN9797_c0_g1	6442	NA	NA	NA	NA	0	0.795	0.591	0.265	0.426	0.062	0	0.115	0.478	0.575	0.368	0.608	0.342	0.795	0.624	0.302	0.421	0.163	0.086	0	As548_TRINITY_DN14191_c0_g1	0	NA	NA	NA	2158	1909	1889	NA	NA	NA	NA	NA	NA	NA	NA	NA	NA
TRINITY_DN9810_c0_g1_i2	2388	2	NA	NA	NA	TRINITY_DN9810_c0_g1	3785	NA	NA	NA	NA	0.257	0.337	0.637	0	0.73	0.837	0.891	0.451	0.312	0.401	0.952	1109	0.87	0.545	1027	1124	0.59	0.265	0.086	0.482	As548_TRINITY_DN7313_c0_g1	0	NA	NA	NA	3596	2788	5053	NA	NA	NA	NA	NA	NA	NA	NA	NA	NA
TRINITY_DN9810_c0_g1_i6	1635	2	NA	NA	NA	TRINITY_DN9810_c0_g1	3785	NA	NA	NA	NA	0.569	0.759	0.544	0	0.172	0.641	0.333	0.212	0.457	0.705	0.539	0.256	0.469	0.916	0.461	1124	0.492	0	0	2221	As548_TRINITY_DN7313_c0_g1	0	NA	NA	NA	3596	2788	5053	NA	NA	NA	NA	NA	NA	NA	NA	NA	NA
TRINITY_DN98130_c0_g1_i1	229	2	NA	NA	NA	TRINITY_DN98130_c0_g1	229	NA	NA	NA	NA	0	0	3.22	0	0	0	0	0	0	0	0	2506	0	0	3042	0	0	0	0	0	As548_TRINITY_DN30312_c0_g1	1.76e-106	NA	NA	NA	0.559	1135	1821	NA	NA	NA	NA	NA	NA	NA	NA	NA	NA
TRINITY_DN9844_c0_g1_i30	2674	2	NA	NA	NA	TRINITY_DN9844_c0_g1	4347	NA	NA	NA	NA	0.108	0.289	0	0	0.375	0.424	0	0.018	0	0.304	0	0.128	0	0.061	0.086	0.551	0.239	0	0	0	As548_TRINITY_DN34665_c0_g1	1.04e-95	NA	NA	NA	0	0	2.47	chr6S	701495353	87.73	489	2.38e-158	566	NA	NA	NA	NA
TRINITY_DN9846_c0_g1_i5	1513	2	NA	NA	NA	TRINITY_DN9846_c0_g1	2853	NA	NA	NA	NA	2317	2421	2.27	0.638	1004	4754	0	1707	3292	1746	0.799	3498	3744	1234	3781	3101	1131	1915	2064	0	As548_TRINITY_DN9092_c0_g2	0	NA	NA	NA	12877	5.04	10.72	NA	NA	NA	NA	NA	NA	NA	NA	NA	NA
[truncated: 7 more rows]
[truncated: 3 more columns]
